# Supplementary material for: Boosting quantum yields and circularly polarized luminescence of penta- and hexahelicenes by doping with two BN-groups
Source: Royal Society of Chemistry journal article supplement (doi:10.1039/d3sc02685j), 2023-10-25
Supplement: d3sc02685j1.zip [file d3sc02685j1.zip]

## Sheet: Hoja2
	ETDM Coordinates (Gaussian)	x	y	z	Dipole Strength (Gauss)	Oscillator Strength (Gauss)	MTDM Coordinates (Gaussian)	x	y	z	ETDM Coordinates (CGS)	x	y	z	MTDM Coordinates (CGS)	x	y	z	Scalar product	Modulus Etrans (esu cm)	Modulus Mtrans (erg G-1)	mu·m	cosine	angle (rad)	angle (°)	D	G	R (erg esu cm G-1)	g [4R/(D+G)]	g [4*modulusMtrans*cos/modulusEtrans]	Wavelength
S1 > S0	1	0.0531	-0.0029	1.2215	1.4949	0.1243	1	-2.1505	0.0023	1.4021	Transition 1	1.34964e-19	-7.37093e-21	3.10469e-18	Transition 1	1.99438e-20	-2.13302e-23	-1.30031e-20	-3.76787e-38	3.10763e-18	2.38083e-20	7.39873e-38	-0.509259	2.10512	120.615	9.65735e-36	5.66834e-40	-3.76787e-38	-0.0156053	-0.0156062	391.83 nm
S0 > S1	1	-0.0679	-0.0019	0.907	0.8272	0.071	1	-1.9428	0.0022	1.1879	Transition 1	-1.72581e-19	-4.82923e-21	2.30532e-18	Transition 1	1.80175e-20	-2.04028e-23	-1.10166e-20	-2.85062e-38	2.31178e-18	2.11187e-20	4.88217e-38	-0.583884	2.1943	125.724	5.34432e-36	4.45998e-40	-2.85062e-38	-0.0213339	-0.0213357	353.86 nm
