# Supplementary material for: Boosting quantum yields and circularly polarized luminescence of penta- and hexahelicenes by doping with two BN-groups
Source: Royal Society of Chemistry journal article supplement (doi:10.1039/d3sc02685j), 2023-10-25
Supplement: d3sc02685j2.pdf [file d3sc02685j2.pdf]

# Supplementary Information

## Boosting Quantum Yields and Circularly Polarized Luminescence of Penta- and Hexahelicenes by Doping with Two BN-Groups

Yannik Appiarius,<sup>a,b</sup> Sandra Míguez-Lago,<sup>c</sup> Pim Puylaert,<sup>d</sup> Noah Wolf,<sup>a</sup> Sourabh Kumar,<sup>e</sup> Martin Molkenhain,<sup>a</sup> Delia Miguel,<sup>f</sup> Tim Neudecker,<sup>b,e,g</sup> Michal Juríček,<sup>h</sup> Araceli G. Campaña,<sup>c</sup> and Anne Staubitz<sup>a,b\*</sup>

a. University of Bremen, Institute for Organic and Analytical Chemistry, Leobener Strasse 7, 28359 Bremen, Germany; E-mail: staubitz@uni-bremen.de.

b. University of Bremen, MAPEX Center for Materials and Processes, 28359 Bremen, Germany.

c. University of Granada, Unidad de Excelencia de Química, Department of Organic Chemistry, 18071 Granada, Spain.

d. University of Bremen, Institute for Inorganic Chemistry and Crystallography, 28359 Bremen, Germany.

e. University of Bremen, Institute for Physical and Theoretical Chemistry, 28359 Bremen, Germany.

f. University of Granada, Unidad de Excelencia de Química, Department of Physical Chemistry, 18071 Granada, Spain.

g. University of Bremen, Bremen Center for Computational Materials Science, 28359 Bremen, Germany.

h. University of Zurich, Department of Chemistry, 8057 Zurich, Switzerland.

### Abstract:

The incorporation of boron–nitrogen (BN) units into polycyclic aromatic hydrocarbons (PAHs) as an isoelectronic replacement of two carbon atoms can significantly improve their optical properties, while the geometries are mostly retained. We report the first non- $\pi$ -extended penta- and hexahelicenes comprising two aromatic 1,2-azaborinine rings. Comparing them with their all-carbon analogs regarding structural, spectral and (chir)optical properties allowed us to quantify the impact of the heteroatoms. In particular, BN-hexahelicene **BN[6]** exhibited a crystal structure congruent with its analog **CC[6]**, but displayed a fivefold higher fluorescence quantum yield ( $\Phi_{fl} = 0.17$ ) and an outstanding luminescence dissymmetry factor ( $|g_{lum}| = 1.33 \times 10^{-2}$ ). Such an unusual magnification of both properties at the same time makes BN-helicenes suitable candidates as circularly polarized luminescence emitters for applications in materials science.

|           |                                                                                                                     |    |
|-----------|---------------------------------------------------------------------------------------------------------------------|----|
| <b>1.</b> | <b>General Methods and Materials</b> .....                                                                          | 1  |
| 1.1.      | NMR Spectroscopy.....                                                                                               | 1  |
| 1.2.      | IR Spectroscopy.....                                                                                                | 1  |
| 1.3.      | Melting Points.....                                                                                                 | 1  |
| 1.4.      | Optical Measurements.....                                                                                           | 1  |
| 1.5.      | Time-Resolved Fluorescence.....                                                                                     | 2  |
| 1.6.      | Mass Spectrometry.....                                                                                              | 2  |
| 1.7.      | Photochemical Setup.....                                                                                            | 2  |
| 1.8.      | Chromatography.....                                                                                                 | 3  |
| 1.9.      | Single Crystals.....                                                                                                | 3  |
| 1.10.     | (CSP)-HPLC.....                                                                                                     | 3  |
| 1.11.     | Chemicals.....                                                                                                      | 3  |
| 1.12.     | Solvents.....                                                                                                       | 5  |
| <b>2.</b> | <b>Experimental Procedures</b> .....                                                                                | 6  |
| 2.1.      | Synthetic Route towards <b>BN[5]</b> and <b>BN[5]-(CN)<sub>2</sub></b> .....                                        | 6  |
| 2.1.1.    | 1-Hydro-2-mesityl-1,2-azaborinine ( <b>14</b> ).....                                                                | 6  |
| 2.1.2.    | 1-Hydro-2-mesityl-6-(4,4,5,5-tetramethyl-1,3,2-dioxaborolan-2-yl)-1,2-azaborinine ( <b>3</b> ).....                 | 7  |
| 2.1.3.    | 1,4-bis(trimethylsilyl)-2,3-dibromobenzene ( <b>15</b> ).....                                                       | 7  |
| 2.1.4.    | 2,3-Dibromo-1,4-diiodobenzene ( <b>16</b> ).....                                                                    | 8  |
| 2.1.5.    | 2,3-Dibromo-1,4-bis(trimethylsilyl)ethynylbenzene ( <b>1</b> ).....                                                 | 8  |
| 2.1.6.    | 1,2-bis(6-(1-Hydro-2-mesityl)-1,2-azaborinyl)-3,6-bis(trimethylsilyl)ethynylbenzene ( <b>4</b> ).....               | 9  |
| 2.1.7.    | 1,14-Dihydro-2,13-dimesityl-1,14-diaza-2,13-diborapentahelicene ( <b>BN[5]</b> ).....                               | 9  |
| 2.1.8.    | 3,12-Dibromo-1,14-dihydro-2,13-dimesityl-1,14-diaza-2,13-diborapentahelicene ( <b>BN[5]-Br<sub>2</sub></b> ).....   | 10 |
| 2.1.9.    | 3,12-Dicyano-1,14-dihydro-2,13-dimesityl-1,14-diaza-2,13-diborapentahelicene ( <b>BN[5]-(CN)<sub>2</sub></b> )..... | 11 |
| 2.2.      | Synthetic Route towards <b>BN[6]</b> .....                                                                          | 11 |
| 2.2.1.    | 1,8-Dibromo-2,7-bis(trifluoromethylsulfonyl)naphthalene ( <b>17</b> ).....                                          | 12 |
| 2.2.2.    | 1,8-Dibromo-2,7-bis(trimethylsilylethynyl)naphthalene ( <b>2</b> ).....                                             | 12 |
| 2.2.3.    | 1,8-bis(6-(1-Hydro-2-mesityl)-1,2-azaborinyl)-2,7-bis(trimethylsilyl)ethynyl)naphthalene ( <b>5</b> ).....          | 13 |
| 2.2.4.    | 1,16-Dihydro-2,15-dimesityl-1,16-diaza-2,15-diborahexahelicene ( <b>BN[6]</b> ).....                                | 13 |
| 2.3.      | Synthetic Route towards <b>CC[5]</b> .....                                                                          | 14 |
| 2.3.1.    | ( <i>E</i> )/( <i>Z</i> )-4-Bromo-4'-formylstilbene ( <b>18</b> ).....                                              | 15 |
| 2.3.2.    | 6-Bromo-3-formylphenanthrene ( <b>19</b> ).....                                                                     | 15 |
| 2.3.3.    | ( <i>E</i> )/( <i>Z</i> )-6-Bromo-3-(2-(4-bromophenyl)ethenyl)phenanthrene ( <b>10</b> ).....                       | 16 |
| 2.3.4.    | 2,13-Dibromopentahelicene ( <b>12</b> ).....                                                                        | 16 |
| 2.3.5.    | 2,13-Dimesitylpentahelicene ( <b>CC[5]</b> ).....                                                                   | 17 |

|           |                                                                                                                               |           |
|-----------|-------------------------------------------------------------------------------------------------------------------------------|-----------|
| 2.4.      | Synthetic Route towards <b>CC[6]</b> .....                                                                                    | 18        |
| 2.4.1.    | 2,7-bis(trifluoromethylsulfonyl)naphthalene ( <b>20</b> ).....                                                                | 18        |
| 2.4.2.    | 2,7-Dimethylnaphthalene ( <b>21</b> ).....                                                                                    | 19        |
| 2.4.3.    | 2,7-bis(Bromomethyl)naphthalene ( <b>22</b> ).....                                                                            | 19        |
| 2.4.4.    | Naphthalene-2,7-bis(methylenetriphenylphosphonium) dibromide ( <b>23</b> ) .....                                              | 19        |
| 2.4.5.    | ( <i>Z,Z</i> )/( <i>E,Z</i> )-2,7-bis(2-(4-Bromophenyl)ethenyl)naphthalene ( <b>11</b> ) .....                                | 20        |
| 2.4.6.    | 2,15-Dibromohexahelicene ( <b>13</b> ).....                                                                                   | 20        |
| 2.4.7.    | 2,15-Dimesitylhexahelicene ( <b>CC[6]</b> ) .....                                                                             | 21        |
| 2.5.      | Optimization of the Ring Closure towards <b>BN[5]</b> .....                                                                   | 22        |
| 2.6.      | Optimization of the Ring Closure towards <b>BN[6]</b> .....                                                                   | 22        |
| 2.7.      | Isolation of <i>endo/exo</i> Hexahelicene ( <b>9</b> ).....                                                                   | 23        |
| 2.8.      | Investigation of the Electrophilic Bromination of <b>CC[5]</b> .....                                                          | 24        |
| <b>3.</b> | <b>Crystallography</b> .....                                                                                                  | <b>26</b> |
| 3.1.      | 1,14-Dihydro-2,13-dimesityl-1,14-diaza-2,13-diborapentahelicene ( <b>BN[5]</b> ) .....                                        | 26        |
| 3.2.      | 3,12-Dibromo-1,14-dihydro-2,13-dimesityl-1,14-diaza-2,13-diborapentahelicene ( <b>BN[5]-Br<sub>2</sub></b> ).....             | 29        |
| 3.3.      | 3,12-Dicyano-1,14-dihydro-2,13-dimesityl-1,14-diaza-2,13-diborapentahelicene ( <b>BN[5]-(CN)<sub>2</sub></b> DCM Complex).... | 34        |
| 3.4.      | 1,16-Dihydro-2,15-dimesityl-1,16-diaza-2,15-diborahexahelicene ( <b>BN[6]</b> ) .....                                         | 40        |
| 3.5.      | 2,13-Dimesitylpentahelicene ( <b>CC[5]</b> ) .....                                                                            | 43        |
| 3.6.      | 2,15-Dimesitylhexahelicene ( <b>CC[6]</b> ) .....                                                                             | 47        |
| <b>4.</b> | <b>Chiral Resolution &amp; Racemization Behavior</b> .....                                                                    | <b>51</b> |
| 4.1.      | Separation of Enantiomers .....                                                                                               | 51        |
| 4.2.      | Kinetics of Racemization .....                                                                                                | 52        |
| <b>5.</b> | <b>Optical Spectroscopy</b> .....                                                                                             | <b>56</b> |
| 5.1.      | Molar Extinction Coefficients .....                                                                                           | 56        |
| 5.2.      | Excitation Spectra.....                                                                                                       | 58        |
| 5.3.      | Fluorescence Lifetimes.....                                                                                                   | 59        |
| 5.4.      | ECD Spectra .....                                                                                                             | 60        |
| 5.5.      | CPL Spectra .....                                                                                                             | 61        |
| <b>6.</b> | <b>NMR Spectra</b> .....                                                                                                      | <b>63</b> |
| 6.1.      | 1-Hydro-2-mesityl-1,2-azaborinine ( <b>14</b> ) .....                                                                         | 63        |
| 6.2.      | 1-Hydro-2-mesityl-6-(4,4,5,5-tetramethyl-1,3,2-dioxaborolan-2-yl)-1,2-azaborinine ( <b>3</b> ).....                           | 64        |
| 6.3.      | 1,4-bis(Trimethylsilyl)-2,3-dibromobenzene ( <b>15</b> ).....                                                                 | 66        |
| 6.4.      | 2,3-Dibromo-1,4-diiodobenzene ( <b>16</b> ) .....                                                                             | 67        |
| 6.5.      | 2,3-Dibromo-1,4-bis(trimethylsilylethynyl)benzene ( <b>1</b> ) .....                                                          | 68        |
| 6.6.      | 1,2-bis(6-(1-Hydro-2-mesityl)-1,2-azaborinyl)-3,6-bis((trimethylsilyl)ethynyl)benzene ( <b>4</b> ) .....                      | 70        |

|           |                                                                                                                     |            |
|-----------|---------------------------------------------------------------------------------------------------------------------|------------|
| 6.7.      | 1,14-Dihydro-2,13-dimesityl-1,14-diaza-2,13-diborapentahelicene ( <b>BN[5]</b> ) .....                              | 72         |
| 6.8.      | 3,12-Dibromo-1,14-dihydro-2,13-dimesityl-1,14-diaza-2,13-diborapentahelicene ( <b>BN[5]-Br<sub>2</sub></b> ).....   | 73         |
| 6.9.      | 3,12-Dicyano-1,14-dihydro-2,13-dimesityl-1,14-diaza-2,13-diborapentahelicene ( <b>BN[5]-(CN)<sub>2</sub></b> )..... | 75         |
| 6.10.     | 1,8-Dibromo-2,7-bis(trifluoromethylsulfonyl)naphthalene ( <b>17</b> ) .....                                         | 76         |
| 6.11.     | 1,8-Dibromo-2,7-bis(trimethylsilylethynyl)naphthalene ( <b>2</b> ) .....                                            | 78         |
| 6.12.     | 1,8-bis(6-(1-Hydro-2-mesityl)-1,2-azaborinyl)-2,7-bis(trimethylsilyl)ethynyl)naphthalene ( <b>5</b> ) .....         | 79         |
| 6.13.     | 1,16-Dihydro-2,15-dimesityl-1,16-diaza-2,15-diborahexahelicene ( <b>BN[6]</b> ) .....                               | 81         |
| 6.14.     | ( <i>Z</i> )-4-Bromo-4'-formylstilbene ( <b>18</b> ).....                                                           | 83         |
| 6.15.     | 6-Bromo-3-formylphenanthrene ( <b>19</b> ) .....                                                                    | 84         |
| 6.16.     | ( <i>Z</i> )-6-Bromo-3-(2-(4-bromophenyl)ethenyl)phenanthrene ( <b>10</b> ) .....                                   | 85         |
| 6.17.     | 2,13-Dibromopentahelicene ( <b>12</b> ) .....                                                                       | 86         |
| 6.18.     | 2,13-Dimesitylpentahelicene ( <b>CC[5]</b> ).....                                                                   | 87         |
| 6.19.     | 2,7-bis(Trifluoromethylsulfonyl)naphthalene ( <b>20</b> ).....                                                      | 88         |
| 6.20.     | 2,7-Dimethylnaphthalene ( <b>21</b> ) .....                                                                         | 89         |
| 6.21.     | 2,7-bis(Bromomethyl)naphthalene ( <b>22</b> ).....                                                                  | 90         |
| 6.22.     | Naphthalene-2,7-bis(methylenetriphenylphosphonium) dibromide ( <b>23</b> ) .....                                    | 91         |
| 6.23.     | ( <i>Z,Z</i> )-2,7-bis(2-(4-Bromophenyl)ethenyl)naphthalene ( <b>11</b> ).....                                      | 93         |
| 6.24.     | 2,15-Dibromohexahelicene ( <b>13</b> ).....                                                                         | 94         |
| 6.25.     | 2,15-Dimesitylhexahelicene ( <b>CC[6]</b> ) .....                                                                   | 95         |
| 6.26.     | Temperature-Dependent <sup>1</sup> H NMR Measurements .....                                                         | 97         |
| <b>7.</b> | <b>Calculations</b> .....                                                                                           | <b>99</b>  |
| 7.1.      | Structure Optimizations .....                                                                                       | 99         |
| 7.2.      | Transition States and Racemization Barrier.....                                                                     | 104        |
| 7.3.      | Nucleus-Independent Chemical Shifts (NICS) .....                                                                    | 106        |
| 7.4.      | Natural Transition Orbitals (NTOs) .....                                                                            | 106        |
| 7.5.      | Electronic Circular Dichroism (ECD).....                                                                            | 107        |
| 7.6.      | Absorption and Luminescence Dissymmetry Factors .....                                                               | 109        |
| 7.7.      | Validation of Dissymmetry Factors .....                                                                             | 109        |
| <b>8.</b> | <b>References</b> .....                                                                                             | <b>110</b> |

## Abbreviations

|                 |                                                                |
|-----------------|----------------------------------------------------------------|
| app             | Apparent (NMR)                                                 |
| aq.             | Aqueous                                                        |
| ATR             | Attenuated total reflectance                                   |
| BPin            | Boronic acid pinacol ester                                     |
| br              | Broad signal (IR)                                              |
| calcd.          | Calculated                                                     |
| COSY            | Correlation spectroscopy (NMR)                                 |
| CPL             | Circularly polarized luminescence                              |
| (CSP)-HPLC      | Chiral-stationary-phase high-performance liquid chromatography |
| CPCM            | Conductor-like polarizable continuum model                     |
| d               | Doublet (NMR)                                                  |
| DCM             | Dichloromethane                                                |
| DFT             | Density functional theory                                      |
| DIPA            | Di- <i>isopropylamine</i>                                      |
| dtbpy           | 4,4'-Di- <i>tert</i> -butyl-2,2'-dipyridyl                     |
| ECD             | Electronic circular dichroism                                  |
| ee              | Enantiomeric excess                                            |
| EI              | Electron ionization                                            |
| $\lambda_{em}$  | Emission wavelength                                            |
| equiv.          | Equivalent                                                     |
| ESI             | Electrospray ionization                                        |
| $\lambda_{ex}$  | Excitation wavelength                                          |
| FT-IR           | Fourier-Transform Infrared spectroscopy                        |
| HMBC            | Heteronuclear multiple-bond correlation spectroscopy (NMR)     |
| HR-MS           | High resolution mass spectrometry                              |
| HSQC            | Heteronuclear single-quantum correlation spectroscopy (NMR)    |
| $J$             | Coupling constant (NMR)                                        |
| LED             | Light-emitting diode                                           |
| m               | Multiplet (NMR), medium intensity (IR)                         |
| m.p.            | Melting point                                                  |
| $\lambda_{max}$ | Wavelength at intensity maximum                                |
| Mes             | Mesityl group                                                  |
| MTBE            | Methyl <i>tert</i> -butyl ether                                |
| <i>n</i> -BuLi  | <i>n</i> -Butyllithium                                         |
| NBS             | <i>N</i> -Bromosuccinimide                                     |
| NMR             | Nuclear magnetic resonance spectroscopy                        |
| NICS            | Nucleus-independent chemical shift                             |
| PAH             | Polycyclic aromatic hydrocarbon                                |
| SAEMS           | Species-associated emission spectra                            |
| TCSPC           | Time-correlated single photon counting                         |
| TRES            | Time-resolved emission spectroscopy                            |

# 1. General Methods and Materials

Unless stated otherwise, all syntheses were carried out under standard Schlenk conditions under an atmosphere of nitrogen or argon. If necessary, reactions were carried out in a nitrogen flushed glove box from Inert Innovative Technology Inc. or reagents were prepared and stored there. All glassware was heated under a vacuum below 0.1 mbar and flushed with inert gas at least three times prior to use. Syringes were flushed with inert gas at least three times before use. NMR tubes were dried in an oven at 110 °C for at least 2 h before use. If reactions were performed in microwave vials, Biotage® microwave reaction vials (2 – 5 mL or 10 – 20 mL) with aluminum caps and septa were used, withstanding pressures up to 30 bar. If reactions were performed in pressure vials, borosilicate pressure vials from FengTecEx, equipped with PTFE caps were used, withstanding pressures of up to 6 bar. Given yields refer to isolated compounds that were synthesized with a purity of ≥95% as determined by <sup>1</sup>H NMR spectroscopy.

## 1.1. NMR Spectroscopy

NMR spectra were recorded at 297 - 300 K. The respective spectrometers and the measuring frequencies are given in the left table below. The chemical shifts (δ) are given in ppm, relative to the residual solvent signals as denoted in the right table below (<sup>1</sup>H and <sup>13</sup>C{<sup>1</sup>H} NMR).

| Nucleus                           | Spectrometer frequency      | Solvent                                       | Reference signal / ppm    |
|-----------------------------------|-----------------------------|-----------------------------------------------|---------------------------|
| <sup>1</sup> H                    | 500 MHz (Bruker DRX 500)    | CDCl <sub>3</sub>                             | 7.26 ( <sup>1</sup> H)    |
|                                   | 601 MHz (Bruker AVANCE NEO) |                                               | 77.16 ( <sup>13</sup> C)  |
| <sup>13</sup> C{ <sup>1</sup> H}  | 126 MHz (Bruker DRX 500)    | C <sub>6</sub> D <sub>6</sub>                 | 7.16 ( <sup>1</sup> H)    |
|                                   | 151 MHz (Bruker AVANCE NEO) |                                               | 128.06 ( <sup>13</sup> C) |
| <sup>11</sup> B{ <sup>1</sup> H}  | 160 MHz (Bruker DRX 500)    | CD <sub>2</sub> Cl <sub>2</sub>               | 5.32 ( <sup>1</sup> H)    |
|                                   | 193 MHz (Bruker AVANCE NEO) |                                               | 53.84 ( <sup>13</sup> C)  |
| <sup>19</sup> F                   | 565 MHz (Bruker AVANCE NEO) | DMSO- <i>d</i> <sub>6</sub>                   | 2.50 ( <sup>1</sup> H)    |
| <sup>29</sup> Si{ <sup>1</sup> H} | 99 MHz (Bruker DRX 500)     | C <sub>2</sub> D <sub>2</sub> Cl <sub>4</sub> | 39.52 ( <sup>13</sup> C)  |
|                                   | 119 MHz (Bruker AVANCE NEO) |                                               | 5.98 ( <sup>1</sup> H)    |
| <sup>31</sup> P{ <sup>1</sup> H}  | 243 MHz (Bruker AVANCE NEO) |                                               |                           |

The signals were identified by using two dimensional methods such as <sup>1</sup>H - <sup>1</sup>H COSY, <sup>1</sup>H - <sup>13</sup>C{<sup>1</sup>H} HSQC and <sup>1</sup>H - <sup>13</sup>C{<sup>1</sup>H} HMBC experiments when possible. The positions of hydrogen and carbon atoms are labelled with letters to simplify their assignment.

## 1.2. IR Spectroscopy

IR spectra were recorded with a Thermo Scientific Nicolet FT-IR Spectrometer System spectrometer with an ATR unit, equipped with a diamond window. The absorption bands are reported in cm<sup>-1</sup>.

## 1.3. Melting Points

Melting points were determined with a Büchi Melting Point M-560 apparatus with a heating rate of 5 °C min<sup>-1</sup>.

## 1.4. Optical Measurements

All measurements were performed in DCM solutions. Absorption spectra that served for the determination of the extinction coefficients were recorded on a Shimadzu UV-2700 spectrometer. Absorption spectra that served for the determination of the sample concentration for temperature-dependent ECD measurements were recorded on an Agilent 8453 spectrophotometer. Quantum yields are double-corrected and were determined on a Jasco FP-8300 spectrofluorometer, using a Jasco ILF-835 integrating sphere. ECD spectra at increased temperature were recorded on a Jasco J-715 or J-815 spectropolarimeter. All other absorption, emission, ECD and CPL spectra were measured on an Olis DSM172 spectrophotometer, using an LED (λ<sub>ex</sub> = 300 or 370 nm) as excitation source. Absorption, ECD and fluorescence spectra

were measured with an integration time of 0.01 s and a slit width of 2.00 mm or 3.00 mm. CPL was measured with an integration time of 1 s and a slit width of 1.00 mm. The obtained CPL spectra represent the average of several consecutive scans (**BN[5]**: 75 scans, **CC[5]**: 168 scans, **BN[6]**: 50 scans, **BN[5]-(CN)<sub>2</sub>**: 52 scans). For all measurements, quartz cuvettes (path length: 1 cm) were used.

### 1.5. Time-Resolved Fluorescence

Time-resolved fluorescence decay traces were collected via the TCSPC method using a FluoTime 200 fluorometer (PicoQuant GmbH). The excitation source was a 375 nm laser using a 10 MHz excitation frequency (BN-helicenes) or a 320 nm LED (carbohelicenes). The full width at half maximum (fwhm) of the laser pulses was around 40 ps. The fluorescence emission was collected at a 90° geometry, focused at the detector after crossing through a polarizer (set at the magic angle), 2 mm slits, and a 2 nm bandwidth monochromator. TCSPC was achieved by a TimeHarp200 board, set at 36 ps/channel. Fluorescence decay traces were collected for the necessary time to reach 20 000 counts at the peak channel. For the analyzed compounds, decay traces were collected at the maximum of the main peaks of the emission spectra.

The fluorescence decay traces were fitted to a mono- or bi-exponential function (depending on the compound and the wavelength), by using a Levenberg-Marquardt algorithm-based nonlinear least-squares error minimization deconvolution method iterative reconvolution methods (FluoFit 4.4 package, PicoQuant GmbH). For each sample, the decay traces were fitted globally with the decay times linked as shared parameters, whereas the pre-exponential factors were local adjustable parameters. The quality of fittings was assessed by the value of the reduced chi-squared,  $\chi^2$ , parameter and random distributions of the weighted residuals and the autocorrelation functions.

Time-resolved emission spectroscopy (TRES) was performed with a 325 nm LED as excitation source and operating at 10 MHz excitation frequency during a fixed amount of time (500 s), to maintain the overall intensity information. For **CC[5]** and **CC[6]**, 37 fluorescence decay traces in the 360 - 540 nm emission range ( $\Delta\lambda_{fl} = 5$  nm) while for **BN[6]**, 30 fluorescence decay traces in the 400 - 545 nm emission range were collected.

For the TRES analysis and the estimation of the species-associated emission spectra (SAEMS), the fitting procedure described above was performed. The SAEMS of each species  $i$  at any given emission wavelength (SAEMS $_{i}(\lambda_{em})$ ) is given by the fluorescence intensity emitted by the species  $i$  ( $A_{i,\lambda_{em}} \times \tau_i$ ), normalized by the total intensity and corrected for the different detection sensitivity using the total intensity of the steady-state spectrum ( $I_{ss,\lambda_{fl}}$ ):

$$SAEMS_i(\lambda_{em}) = \frac{A_{i,\lambda_{em}} \times \tau_i}{\sum_i A_{i,\lambda_{em}} \times \tau_i} \cdot I_{ss,\lambda_{em}}$$

The approximate contribution of each species can be assessed as the area under the SAEMS. This estimation assumes equal excitation rate for all the species, as the initial amount of each form in the excited state (after the pulse excitation) is unknown.

### 1.6. Mass Spectrometry

GC-MS analyses were performed using an Agilent Technologies 7890 B chromatograph with an Agilent Technologies 5977A mass selective detector and an Agilent Technologies dimethylpolysiloxane column (19091S-931E, nominal length 30 m, 0.25 mm diameter, 0.25  $\mu$ m grain size). High resolution EI mass spectra were recorded on a double focusing mass spectrometer ThermoQuest MAT 95 XL from Finnigan MAT (EI, 70 eV, R ~ 10 000). High resolution ESI mass spectra were recorded on a Bruker Impact II. All signals were reported with the quotient from mass to charge ( $m/z$ ).

### 1.7. Photochemical Setup

All photochemical syntheses were performed in a steel reaction vessel (maximum filling volume ~ 140 mL), equipped with two glass windows on each side, a steel screw cap with septum and a gas inlet (see below). Generally, the reaction mixtures were pre-mixed in a round-bottom flask and then poured into the vessel. After sealing, the mixtures were degassed by bubbling argon through them for 5 min while stirring. Two LEDs (Nichia NCSU276A, emission maximum at

365 nm, powered by 3500 mAh batteries) were used as light sources. The respective mixtures were stirred under irradiation for the timeframes as denoted in the experimental procedures. The decay of the radiance is shown below and was determined with an International Light Technologies ILT2400 Optical Meter and is given in  $\text{mW}/\text{cm}^2$ .

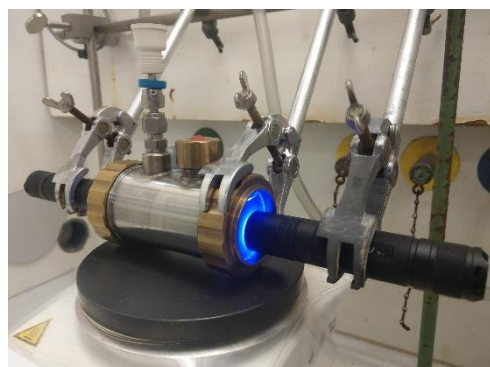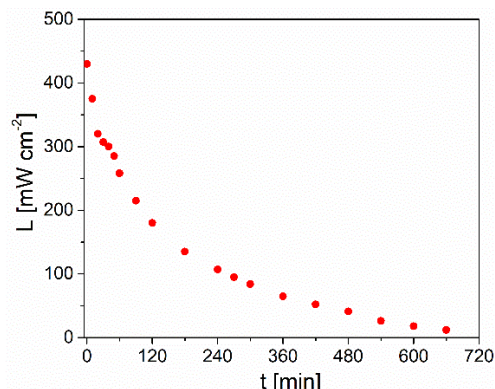

## 1.8. Chromatography

TLC was performed using silica gel on alumina plates (Macherey-Nagel, ALUGRAM® Xtra SIL G/UV<sub>254</sub>); the individual spots were visualized under a Lamag UV lamp (wavelengths: 254 nm / 365 nm). Manual chromatographic purifications were performed with the aid of silica gel provided by Macherey-Nagel (0.063 – 0.040 mm) and Merck (0.040 – 0.015 mm). Automated purifications were performed utilizing an Interchim Puriflash® 430 system. The cartridges were used depending on the amount of substance (40 g – 120 g; supplied from Interchim GmbH; grain size: 30 or 50  $\mu\text{m}$ ).

## 1.9. Single Crystals

Single crystals were grown as denoted in the section Single Crystal Data. In all cases, a suitable crystal was selected and measured on a Bruker D8 Venture CMOS diffractometer. The crystal was kept at 100.00 K during data collection. Using Olex2<sup>1</sup>, the structure was solved with the XT<sup>2</sup> structure solution program using Intrinsic Phasing and refined with the XL<sup>3</sup> refinement package using Least Squares minimization. The Deposition Numbers as denoted in the section Single Crystal Data contain the supplementary crystallographic data for this paper. These data are provided free of charge by the joint Cambridge Crystallographic Data Centre and Fachinformationszentrum Karlsruhe Access Structures service [www.ccdc.cam.ac.uk/structures](http://www.ccdc.cam.ac.uk/structures).

## 1.10. (CSP)-HPLC

Chiral resolutions by (CSP)-HPLC were run either on an Agilent Series 1100 instrument equipped with a ReproSil Chiral-MIA (5  $\mu\text{m}$ , 250 x 4.6 mm, amylose material) column for analytical amounts of sample, using a flow rate of 1.0  $\text{mL min}^{-1}$  or on an Agilent Technologies 1260 Infinity II instrument equipped with a Chiralpak IA (5  $\mu\text{m}$ , 250 x 10 mm, amylose material) column for semi-preparative amounts of sample, using a flow rate of 3.8 - 4.0  $\text{mL min}^{-1}$ . The eluent mixtures and injection volumes are given for each individual compound in Section 4.

## 1.11. Chemicals

Unless stated otherwise, chemicals were used without further purification. In case the purity is not denoted in the table, it was not stated by the supplier.

| Chemical                                                     | Supplier      | Purity | Purification / Notes |
|--------------------------------------------------------------|---------------|--------|----------------------|
| 4,4'-Azobis(4-cyanopentanoic acid)                           | Sigma Aldrich | 98%    |                      |
| (1,1'-Bis(diphenylphosphino)-ferrocene)dichloropalladium(II) | abcr          | 99.9%  | [B]                  |
| Bis(pinacolato)diboron                                       | abcr          | 98%    |                      |
| Bis(triphenylphosphine)palladium(II) dichloride              | chempur       | 99%    | [B]                  |



| Chemical                                                          | Supplier          | Purity    | Purification / Notes                               |
|-------------------------------------------------------------------|-------------------|-----------|----------------------------------------------------|
| 4-Bromobenzaldehyde                                               | BLD Pharm         | 99%       |                                                    |
| (4-Bromobenzyl)-<br>triphenylphosphonium bromide                  | BLD Pharm         | 97%       |                                                    |
| <i>N</i> -Bromosuccinimide                                        | TCI               | 98%       |                                                    |
| Bromo(triphenylphosphine)gold(I)                                  | Alfa Aesar        | 99.99%    | Premion <sup>[B]</sup>                             |
| 1-( <i>tert</i> -Butyldimethylsilyl)-<br>2-chloro-1,2-azaborinine | abcr              | 98%       | <sup>[B]</sup>                                     |
| <i>n</i> -Butyllithium                                            | Acros             | Acroseal  | 2.5 M solution in hexanes                          |
| Celite® 535                                                       | Roth              |           |                                                    |
| Copper(I) iodide                                                  | Alfa Aesar        | 99.998%   | <sup>[B]</sup>                                     |
| (1,5-Cyclooctadiene)-<br>(methoxy)iridium(I) dimer                | Sigma Aldrich     | >98%      | <sup>[B]</sup>                                     |
| 1,2-Dibromobenzene                                                | Thermo Fisher     | 98%       |                                                    |
| Dichloro( <i>p</i> -cymene)ruthenium(II)<br>dimer                 | Apollo Scientific | 98%       | <sup>[B]</sup>                                     |
| Dichloro(1,3-bis(diphenyl-<br>phosphino)propane)nickel(II)        | Sigma Aldrich     | 97%       | <sup>[B]</sup>                                     |
| 2-Dicyclohexylphosphino-2',6'-<br>dimethoxybiphenyl (SPhos)       | Strem             | 98%       | <sup>[B]</sup>                                     |
| 2,7-Dihydroxynaphthalene                                          | Thermo Fisher     | 97%       |                                                    |
| Diisopropylamine                                                  | Sigma Aldrich     | 99.5%     | dist. from CaH <sub>2</sub> <sup>[A] [B] [C]</sup> |
| 4,4'-Di- <i>tert</i> -butyl-2,2'-bipyridyl                        | Sigma Aldrich     | 98%       |                                                    |
| Gold(III) chloride                                                | abcr              | 99%       | <sup>[B]</sup>                                     |
| Iodine                                                            | abcr              | 99%       |                                                    |
| Iodine monochloride                                               | Sigma Aldrich     | Sure/Seal | 1.0 M solution in DCM                              |
| Mesitylmagnesium bromide                                          | Sigma Aldrich     | Sure/Seal | 1.0 M solution in diethyl ether <sup>[B]</sup>     |
| Methylmagnesium bromide                                           | Thermo Fisher     |           | 3.0 M solution in diethyl ether <sup>[B]</sup>     |
| Piperidine                                                        | abcr              | 99%       |                                                    |
| Platinum(II) chloride                                             | chempur           | 99.9%     | <sup>[B]</sup>                                     |
| Potassium hydroxide                                               | Sigma Aldrich     | 85%+      |                                                    |
| Potassium phosphate                                               | Sigma Aldrich     | 98%+      |                                                    |
| Propylene oxide                                                   | Thermo Fisher     | 99%+      |                                                    |
| Silver hexafluoroantimonate(V)                                    | Alfa Aesar        | 99%       | <sup>[B]</sup>                                     |
| Sodium hydrogen carbonate                                         | VWR               | 100%      |                                                    |
| Sodium hydroxide                                                  | VWR               | 98.6%     |                                                    |
| Sodium sulfate                                                    | Merck             | 99%+      |                                                    |
| Sodium thiosulfate pentahydrate                                   | VWR               | 99.8%+    |                                                    |
| Terephthalaldehyde                                                | BLD Pharm         | 99.63%    |                                                    |
| Triethylamine                                                     | Acros             | 99%       | anhydrous <sup>[A] [B]</sup>                       |
| Trifluoromethanesulfonic acid<br>anhydride                        | abcr              | 99%       |                                                    |
| Trimethylsilyl chloride                                           | Sigma Aldrich     | 99%       |                                                    |
| Trimethylsilylacetylene                                           | abcr / fluorochem | 98%       | <sup>[A] [B]</sup>                                 |
| Triphenylphosphine                                                | Alfa Aesar        | 99%       |                                                    |
| Tris(dibenzylideneacetone)-<br>dipalladium(0)                     | Sigma Aldrich     | 97%+      | <sup>[B]</sup>                                     |

**Purification methods:**

[A] Degassed by bubbling argon

[B] Stored under inert conditions in a glove box / in a Schlenk vessel

[C] Stored over molecular sieves (3 or 4 Å)

**1.12. Solvents**

Unless stated otherwise, solvents were used without further purification. If a dried solvent was required, the additional purification / desiccation steps as denoted in the last column of the subsequent table were performed. Moreover, the use of a dried solvent is mentioned in the regarding experimental procedure, if relevant.

| Solvent                                | Supplier      | Purity / Purification                | Additional Purifications / Desiccation |
|----------------------------------------|---------------|--------------------------------------|----------------------------------------|
| Benzene                                | Sigma Aldrich | 99.8%                                | [B]                                    |
| Benzene- <i>d</i> <sub>6</sub>         | Deutero       | >99.5%                               |                                        |
| Chloroform                             | Sigma Aldrich | 99.0-99.4%                           |                                        |
| Chloroform- <i>d</i> <sub>1</sub>      | Deutero       | 99.8%                                | [C]                                    |
| Cyclohexane                            | VWR           | 99.5%                                |                                        |
| Dichloromethane                        | VWR           | 100%                                 |                                        |
| Dichloromethane- <i>d</i> <sub>2</sub> | Deutero       | >99.6%                               |                                        |
| Diethyl ether                          | VWR           | distilled by rotary evaporation      | [D]                                    |
| Dimethylformamide                      | VWR           | 99.9%                                |                                        |
| 1,4-Dioxane                            | Thermo Fisher | 99.5%                                | [B] [C]                                |
| Ethyl acetate                          | VWR           | 99.9%                                |                                        |
| <i>n</i> -Hexane                       | Sigma Aldrich | 99%                                  |                                        |
| Hydrochloric acid                      | Merck         | 37% aq. solution                     |                                        |
| Mesitylene                             | Merck         | 98%                                  | [A] [B]                                |
| Methanol                               | VWR           | 100%                                 |                                        |
| Methyl- <i>tert</i> -butyl ether       | Acros         | Acroseal, 99%                        | [A] [B]                                |
| <i>n</i> -Pentane                      | VWR           | 95%, distilled by rotary evaporation |                                        |
| Pyridine                               | Sigma Aldrich | 99.5%+                               |                                        |
| Sulfuric acid                          | VWR           | 95%                                  |                                        |
| Tetrahydrofuran                        | VWR           | 100%                                 | [B] [D]                                |
| Toluene                                | VWR           | HPLC grade                           | [B] [D]                                |
| Water                                  |               | Deionized                            | [A]                                    |

**Purification methods:**

[A] Degassed by bubbling argon

[B] Stored under inert conditions in a glove box / in a Schlenk vessel

[C] Stored over molecular sieves (3 or 4 Å)

[D] Purified via an Inert PS-MD-6 solvent purification system (SPS) (if denoted as "dry")

## 2. Experimental Procedures

### 2.1. Synthetic Route towards BN[5] and BN[5]-(CN)<sub>2</sub>

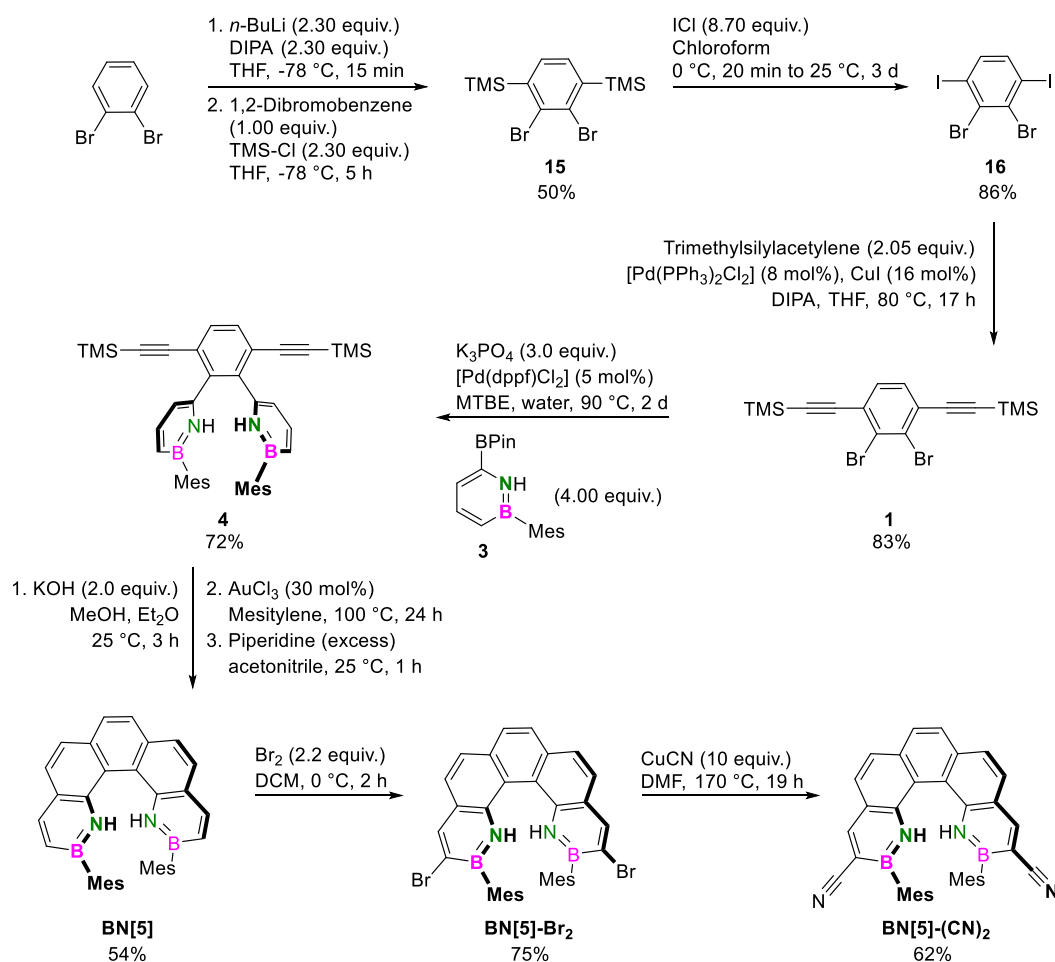

**Scheme S1.** Overview of the syntheses towards BN[5] and subsequent functionalization to obtain BN[5]-(CN)<sub>2</sub>.

#### 2.1.1. 1-Hydro-2-mesityl-1,2-azaborinine (14)

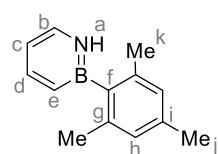

In a glove box, 1-(*tert*-butyldimethylsilyl)-2-chloro-1,2-azaborinine (2.28 g, 10.0 mmol, 1.00 equiv.) was dissolved in dry THF (100 mL). Outside the box on a Schlenk line, the solution was cooled to -78 °C. A solution of mesityllithium (3.15 g, 25.0 mmol, 2.50 equiv.)\* in dry THF (15 mL) was added over the course of 5 min while stirring. The cooling bath was removed and stirring was continued for 30 min. *n*-Pentane and water (50 mL, respectively) were added and the phases were separated. The aqueous layer was extracted with *n*-pentane (3 x 50 mL) and the combined organic phases were washed with water (2 x 50 mL). After drying over sodium sulfate, filtration and evaporation of THF and *n*-pentane in vacuo, a yellow oil was obtained. <sup>1</sup>H NMR spectroscopy revealed a quantitative conversion. The crude product was dissolved in dry THF (200 mL). At 25 °C, a solution of tetra-*n*-butylammonium fluoride (1.0 M in THF, 12.0 mL, 12.0 mmol, 1.20 equiv.) was added at once. Stirring was continued for 1 h at this temperature. Afterwards, cyclohexane and water (50 mL, respectively) were added and the phases were separated. The aqueous layer was extracted with cyclohexane (3 x 50 mL) and the combined organic phases were washed with water (2 x 50 mL). After drying over sodium sulfate, filtration and evaporation of the solvents in vacuo, a brown oil was obtained. Remaining mesitylene and *tert*-butyldimethylsilylated derivatives were removed by rotary evaporation (5 mbar, 95 °C water bath temperature) until weight constancy (this took ca. 3–4 h). A light brown oil (1.90 g, 96% over two steps, Lit.<sup>4</sup>: 66%) was obtained, that slowly solidified at 5 °C.

**<sup>1</sup>H NMR** (500 MHz, CDCl<sub>3</sub>): δ = 7.89 (app br s, 1H, a),<sup>5</sup> 7.74 (ddd, <sup>3</sup>J = 11.1, 6.5 Hz, <sup>4</sup>J = 1.2 Hz, 1H, d), 7.41 (dd, <sup>3</sup>J = 7.0, 6.5 Hz, 1H, b), 6.93 – 6.87 (m, 3H, e, h), 6.40 (dddd, <sup>3</sup>J = 6.5, 6.5 Hz, <sup>4</sup>J = 1.5, 1.5 Hz, 1H, c), 2.33 (s, 3H, j), 2.19 (s, 6H, k) ppm.

**<sup>13</sup>C{<sup>1</sup>H} NMR\*** (126 MHz, CDCl<sub>3</sub>): δ = 143.9 (d), 140.4 (g), 137.4 (i), 133.9 (b), 127.3 (h), 110.6 (c), 23.2 (k), 21.3 (j) ppm.

**<sup>11</sup>B{<sup>1</sup>H} NMR** (160 MHz, CDCl<sub>3</sub>): δ = 36.1 ppm.

**IR** (ATR):  $\tilde{\nu}$  [cm<sup>-1</sup>] = 3372 (m), 3086 (w), 3025 (w), 2956 (w), 2914 (w), 1652 (w), 1597 (m), 1540 (s), 1448 (s), 1339 (m), 1150 (m), 971 (m), 870 (m), 852 (s), 766 (s), 712 (s).

**HR-MS** (EI, 70 eV, R ~ 10 000): *m/z* (%) calcd. for C<sub>13</sub>H<sub>16</sub><sup>11</sup>BN 197.13703 [M]<sup>+</sup>, found 197.13732 [M]<sup>+</sup> (100).

**M.p.:** 53 °C.

**R<sub>f</sub>** (silica, eluents: 5% diethyl ether in cyclohexane): 0.43.

\* Compound synthesized according to a literature procedure.<sup>6</sup>

\*\* The signals of the carbon atoms e and f were not detected due to the presence of an adjacent boron atom.<sup>7-9</sup>

### 2.1.2. 1-Hydro-2-mesityl-6-(4,4,5,5-tetramethyl-1,3,2-dioxaborolan-2-yl)-1,2-azaborinine (3)

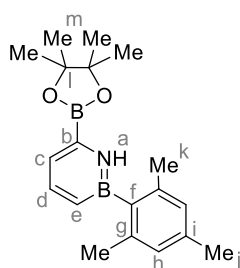

In a glove box, [Ir(OMe)(cod)]<sub>2</sub> (99.4 mg, 150 μmol, 1.5 mol%), dtbpy (80.5 mg, 300 μmol, 3 mol%), bis(pinacolato)diboron (2.79 g, 11.0 mmol, 1.10 equiv.) and dry MTBE (40 mL) were mixed. The mixture was added to a stirred solution of 1-hydro-2-mesityl-1,2-azaborinine (**14**, 1.97 g, 10.0 mmol, 1.00 equiv.) in dry MTBE (160 mL) and stirring was continued for 17 h at 25 °C. The solvent was removed in vacuo and the dark brown, crude product was purified by column chromatography (silica, eluents: 5% diethyl ether in *n*-pentane) to yield a colorless solid (2.32 g, 72%, Lit.<sup>4</sup>: 95%).

**<sup>1</sup>H NMR** (500 MHz, CDCl<sub>3</sub>): δ = 8.40 (app br s, 1H, a),<sup>5</sup> 7.72 (dd, <sup>3</sup>J = 11.1, 6.5 Hz, 1H, d), 7.06 (ddd, <sup>3</sup>J = 11.1 Hz, <sup>4</sup>J = 1.7, 1.3 Hz, 1H, e), 6.97 (ddd, <sup>3</sup>J = 6.5 Hz, <sup>4</sup>J = 1.7, 1.3 Hz, 1H, c), 6.89 (s, 2H, h), 2.32 (s, 3H, j), 2.17 (s, 6H, k), 1.33 (s, 12H, m) ppm.

**<sup>13</sup>C{<sup>1</sup>H} NMR\*** (126 MHz, CDCl<sub>3</sub>): δ = 142.6 (d), 140.4 (g), 137.3 (i), 127.2 (h), 119.8 (c), 84.8 (l), 25.0 (m), 23.3 (k), 21.3 (j) ppm.

**<sup>11</sup>B{<sup>1</sup>H} NMR** (160 MHz, CDCl<sub>3</sub>): δ = 35.9 (azaborinine), 29.5 (BPin) ppm.

**IR** (ATR):  $\tilde{\nu}$  [cm<sup>-1</sup>] = 3394 (m), 3020 (w), 2972 (m), 2921 (m), 2854 (w), 1705 (w), 1609 (m), 1543 (m), 1446 (w), 1413 (m), 1370 (s), 1325 (s), 1142 (s), 960 (m), 847 (s).

**HR-MS** (EI, 70 eV, R ~ 10 000): *m/z* (%) calcd. for C<sub>19</sub>H<sub>27</sub><sup>10</sup>B<sub>2</sub>NO<sub>2</sub> 321.22950 [M]<sup>+</sup>, found 321.23008 [M]<sup>+</sup> (100).

**M.p.:** 141 °C.

**R<sub>f</sub>** (silica, eluents: 5% diethyl ether in *n*-pentane): 0.33.

\* The signals of the carbon atoms b, e and f were not detected due to the presence of an adjacent boron atom.<sup>7-9</sup>

### 2.1.3. 1,4-bis(trimethylsilyl)-2,3-dibromobenzene (15)

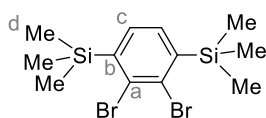

Dry THF (50 mL) was cooled to –78 °C in a 500 mL Schlenk flask. At this temperature, *n*-BuLi (9.20 mL, 23.0 mmol, 2.30 equiv.) and DIPA (2.33 g, 23.0 mmol, 2.30 equiv.) were added.

After 15 min of stirring, the resulting solution was added to a solution of 1,2-dibromobenzene (2.36 g, 10.0 mmol, 1.00 equiv.) and trimethylsilyl chloride (2.50 g, 23.0 mmol, 2.30 equiv.) in dry THF (50 mL) at –78 °C over the course of 3 min. The reaction mixture was stirred at this temperature for 5 h and quenched with diluted sulfuric acid (2 M, 50 mL). The resulting mixture was diluted with water (100 mL) and extracted with diethyl ether (3 x 40 mL). The combined organic layers were dried over sodium sulfate and the solvent was removed in vacuo. The product was allowed to crystallize (14 d, –20 °C) and washed with methanol (5 mL) to obtain colorless, rhomboid crystals (1.90 g, 50%, Lit.<sup>10</sup>: 55%).

**<sup>1</sup>H NMR** (500 MHz, CDCl<sub>3</sub>): δ = 7.33 (s, 2H, c), 0.39 (s, 18H, d) ppm.

**<sup>13</sup>C{<sup>1</sup>H} NMR** (126 MHz, CDCl<sub>3</sub>): δ = 145.9 (b), 134.1 (c), 133.5 (a), –0.3 (d) ppm.

**<sup>29</sup>Si{<sup>1</sup>H} NMR** (99 MHz, CDCl<sub>3</sub>): δ = 0.4 ppm.

**IR** (ATR):  $\tilde{\nu}$  [ $\text{cm}^{-1}$ ] = 3057 (w), 2953 (m), 2897 (w), 1405 (w), 1371 (w), 1319 (s), 1248 (s), 1189 (s), 1159 (s), 1034 (s), 837 (s), 756 (s), 710 (m), 659 (m), 660 (w).

**HR-MS** (EI, 70 eV, R ~ 10 000):  $m/z$  (%) calc. for  $\text{C}_{12}\text{H}_{20}^{79}\text{Br}_2\text{Si}_2$  377.94648 [M]<sup>+</sup>, found 377.94596 [M]<sup>+</sup> (5), 365.0 (100).

**M.p.:** 70 °C (Lit.<sup>11</sup>: 71 – 73 °C).

**R<sub>f</sub>** (silica, eluent: cyclohexane): 0.79.

#### 2.1.4. 2,3-Dibromo-1,4-diiodobenzene (16)

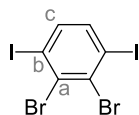

Iodine monochloride (1.0 M in DCM, 110 mL, 110 mmol, 8.70 equiv.) was added to a solution of 1,4-bis(trimethylsilyl)-2,3-dibromobenzene (**15**, 4.82 g, 12.7 mmol, 1.00 equiv.) in chloroform (200 mL) at 0 °C over the course of 20 min. The mixture was stirred for 3 d at 25 °C. The solvent was removed in vacuo. Using a rotary evaporator (5 mbar, 80 °C water bath temperature), the remaining iodine and iodine monochloride were sublimed to the edge of the reaction flask until the remaining solid had a pale-yellow color. The latter was crystallized from methanol (–20 °C, ca. 100 mL) to yield colorless flakes (5.35 g, 86%, Lit.<sup>12</sup>: 91%).

**<sup>1</sup>H NMR** (500 MHz,  $\text{CDCl}_3$ ):  $\delta$  = 7.47 (s, 2H, c) ppm.

**<sup>13</sup>C{<sup>1</sup>H} NMR** (126 MHz,  $\text{CDCl}_3$ ):  $\delta$  = 139.9 (c), 132.0 (a), 101.6 (b) ppm.

**IR** (ATR):  $\tilde{\nu}$  [ $\text{cm}^{-1}$ ] = 3078 (w), 3024 (w), 2963 (w), 1399 (s), 1318 (s), 1310 (s), 1152 (s), 1005 (s), 943 (w), 798 (s), 748 (w), 731 (s), 708 (s).

**HR-MS** (EI, 70 eV, R ~ 10 000):  $m/z$  (%) calc. for  $\text{C}_6\text{H}_2^{79}\text{Br}_2\text{I}_2$  485.66072 [M]<sup>+</sup>, found 485.66098 [M]<sup>+</sup> (43), 487.7 (100).

**M.p.:** 130 °C (Lit.<sup>12</sup>: 125 – 126 °C).

**R<sub>f</sub>** (silica, eluent: cyclohexane): 0.74.

#### 2.1.5. 2,3-Dibromo-1,4-bis(trimethylsilyl)ethynylbenzene (1)

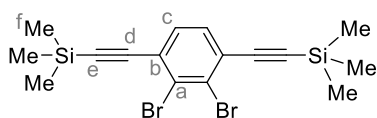

In a glove box, 2,3-dibromo-1,4-diiodobenzene (**16**, 4.88 g, 10.0 mmol, 1.00 equiv.), copper(I) iodide (305 mg, 1.60 mmol, 16 mol%), [Pd(PPh<sub>3</sub>)<sub>2</sub>Cl<sub>2</sub>] (491 mg, 0.70 mmol, 7.0 mol%), DIPA (40 mL) and dry THF (200 mL) were placed in a Schlenk flask. While stirring, trimethylsilylacetylene (2.01 g, 20.5 mmol, 2.05 equiv.) was added dropwise to the mixture, which subsequently was heated to 80 °C for 17 h. After cooling, DCM and water (200 mL, respectively) were added. The phases were separated and the aqueous layer was extracted with DCM (3 x 50 mL). The organic layer was then washed with water (2 x 100 mL). The combined organic layers were dried over sodium sulfate, filtered and concentrated in vacuo. The crude product was filtered over silica (eluent: cyclohexane). Removing the solvent in vacuo furnished a yellow oil (3.56 g, 83%), that slowly crystallized at 25 °C.

**<sup>1</sup>H NMR** (601 MHz,  $\text{CDCl}_3$ ):  $\delta$  = 7.35 (s, 2H, c), 0.27 (s, 18H, f) ppm.

**<sup>13</sup>C{<sup>1</sup>H} NMR** (151 MHz,  $\text{CDCl}_3$ ):  $\delta$  = 131.5 (c), 128.9 (b), 127.1 (a), 103.2 (e), 102.4 (d), -0.1 (f) ppm.

**<sup>29</sup>Si{<sup>1</sup>H} NMR** (99 MHz,  $\text{CDCl}_3$ ):  $\delta$  = –16.5 ppm.

**IR** (ATR):  $\tilde{\nu}$  [ $\text{cm}^{-1}$ ] = 2953 (w), 2925 (w), 2896 (w), 2171 (w), 2152 (w), 1436 (m), 1408 (w), 1350 (m), 1247 (s), 1095 (w), 912 (w), 839 (s), 824 (s), 757 (s), 698 (m), 656 (m).

**HR-MS** (EI, 70 eV, R ~ 10 000):  $m/z$  (%) calc. for  $\text{C}_{16}\text{H}_{20}^{79}\text{Br}_2\text{Si}_2$  425.94648 [M]<sup>+</sup>, found 425.94696 [M]<sup>+</sup> (22), 413.1 (100).

**M.p.:** 79 °C.

**R<sub>f</sub>** (silica, eluent: cyclohexane): 0.50.

### 2.1.6. 1,2-bis(6-(1-Hydro-2-mesityl)-1,2-azaborinyl)-3,6-bis((trimethylsilyl)ethynyl)benzene (**4**)

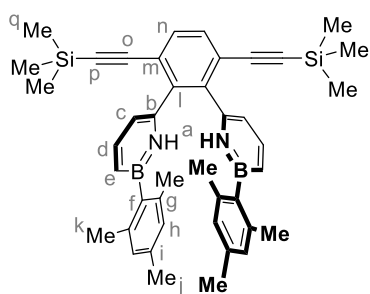

A pressure vial was charged with 2,3-dibromo-1,4-bis(trimethylsilyl)ethynylbenzene (**1**, 428 mg, 1.00 mmol, 1.00 equiv.), 2-mesityl-6-(4,4,5,5-tetramethyl-1,3,2-dioxaborolan-2-yl)-1,2-azaborinine (**3**, 1.29 g, 4.00 mmol, 4.00 equiv.) and potassium phosphate (637 mg, 3.00 mmol, 3.00 equiv.). In a glove box, [Pd(dppf)Cl<sub>2</sub>] (36.6 mg, 50.0 μmol, 5 mol%) and dry MTBE (45 mL) were added. Outside the box on a Schlenk line, degassed water (5 mL) was added and the reaction mixture was further degassed by bubbling Ar through it for 5 min. The reaction mixture was heated at 90 °C for 2 d. Water (40 mL) was added and the mixture was extracted with diethyl ether (3 × 40 mL). The combined organic phases were concentrated in vacuo. The crude product was purified by column chromatography (silica, eluents: 1% diethyl ether in cyclohexane) to remove the excess of BPin-azaborinine **3**. Recrystallization from methanol (200 mL) yielded a colorless solid (476 mg, 72%).

**<sup>1</sup>H NMR** (600 MHz, CDCl<sub>3</sub>): δ = 7.57 (dd, <sup>3</sup>J = 11.2, 6.7 Hz, 2H, d), 7.56 (app br s, 2H, a),<sup>5</sup> 7.52 (s, 2H, n), 6.80 (s, 4H, h), 6.71 (dt, <sup>3</sup>J = 11.2 Hz, <sup>4</sup>J = 1.5 Hz, 2H, e), 6.27 (ddd, <sup>3</sup>J = 6.7 Hz, <sup>4</sup>J = 2.0, 1.2 Hz, 2H, c), 2.27 (s, 6H, j), 2.00 (s, 12H, k), 0.07 (s, 18H, q) ppm.

**<sup>13</sup>C{<sup>1</sup>H} NMR** (151 MHz, CDCl<sub>3</sub>): δ = 143.4 (d), 141.4 (b), 141.1 (l), 140.3 (g), 137.2 (i), 132.7 (n), 130.2 (e), 127.0 (h), 123.9 (m), 112.9 (c), 102.4 (p), 100.9 (o), 23.4 (k), 21.3 (j), -0.2 (q) ppm.

**<sup>11</sup>B{<sup>1</sup>H} NMR** (193 MHz, CDCl<sub>3</sub>): δ = 37.4 ppm.

**<sup>29</sup>Si{<sup>1</sup>H} NMR** (99 MHz, CDCl<sub>3</sub>): δ = -17.3 ppm.

**IR** (ATR):  $\tilde{\nu}$  [cm<sup>-1</sup>] = 3395 (w), 3354 (w), 3019 (w), 2958 (m), 2915 (w), 2856 (w), 2152 (w), 1609 (m), 1544 (s), 1447 (s), 1373 (m), 1249 (s), 1153 (w), 1118 (w), 1087 (w), 885 (s), 840 (s), 761 (s), 730 (m), 701 (w).

**HR-MS** (ESI positive): *m/z* calc. for C<sub>42</sub>H<sub>50</sub><sup>11</sup>B<sub>2</sub>N<sub>2</sub>NaSi<sub>2</sub> 683.35908 [M+Na]<sup>+</sup>, found 683.35888 [M+Na]<sup>+</sup>.

**M.p.**: 250 °C.

**R<sub>f</sub>** (silica, eluents: 1% diethyl ether in cyclohexane): 0.29.

The signal of the carbon atom f was not detected due to the presence of an adjacent boron atom.<sup>7-9</sup>

### 2.1.7. 1,14-Dihydro-2,13-dimesityl-1,14-diaza-2,13-diborapentahelicene (BN[5])

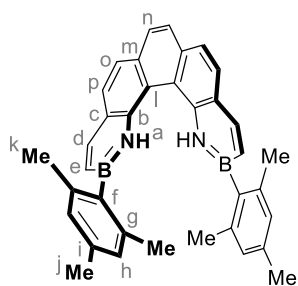

1,2-bis(6-(1-Hydro-2-mesityl)-1,2-azaborinyl)-3,6-bis((trimethylsilyl)ethynyl)benzene (**4**, 266 mg, 403 μmol, 1.00 equiv.) was dissolved in methanol and diethyl ether (100 mL, respectively). Potassium hydroxide (45.2 mg, 806 μmol, 2.00 equiv.) was added and the mixture was stirred for 3 h at 25 °C, when a quantitative deprotection was determined by TLC. Diethyl ether and brine (50 mL, respectively) were added, the phases were separated and the aqueous layer was extracted with diethyl ether (3 × 50 mL). The combined organic layers were washed with water (2 × 50 mL), dried over sodium sulfate, filtered, and the solvents were removed in vacuo. The crude product was placed in a pressure vial. In a glove box, gold(III) chloride (37.1 mg, 121 μmol, 30 mol%) and dry mesitylene (20 mL) were added. The mixture was heated at 100 °C for 24 h. After cooling, it was filtered over Celite and rinsed with toluene (50 mL) to remove the catalyst. The solvents were removed in vacuo the crude product was redissolved in acetonitrile (50 mL). Piperidine (3.0 mL) was added and the mixture was stirred for 1 h at 25 °C to derivatize the *endo/exo* side-product **8** (ratio <5%). The volatiles were removed in vacuo and the crude product was filtered over silica (eluents: 1% diethyl ether in cyclohexane). Subsequently, it was dissolved in methanol (100 mL). At a rotary evaporator (water bath temperature: 60 °C), the methanol was slowly evaporated until the product precipitated. This sequence was repeated until no more product was present in solution. Filtration via a glass frit gave a yellow solid (112 mg, 54%).

### Deprotected Alkyne (6):

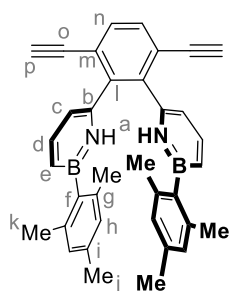

$^1\text{H NMR}$  (600 MHz,  $\text{CDCl}_3$ ):  $\delta$  = 7.80 (app br s, 2H, a),<sup>5</sup> 7.58 (s, 2H, n), 7.53 (dd,  $^3J$  = 11.1, 6.7 Hz, 2H, d), 6.84 (s, 4H, h), 6.74 (ddd,  $^3J$  = 11.1 Hz,  $^4J$  = 2.0, 1.2 Hz, 2H, e), 6.07 (ddd,  $^3J$  = 6.7 Hz,  $^4J$  = 2.0, 1.2 Hz, 2H, c), 3.14 (s, 2H, p), 2.29 (s, 6H, j), 2.11 (s, 12H, k) ppm.

$R_f$  (silica, eluents: 1% diethyl ether in cyclohexane): 0.06.

### Helicene (BN[5]):

$^1\text{H NMR}$  (600 MHz,  $\text{CDCl}_3$ ):  $\delta$  = 8.31 (br s, 2H, a), 8.23 (d,  $^3J$  = 11.3 Hz, 2H, d), 7.92 (d,  $^3J$  = 8.1 Hz, 2H, p), 7.86 (s, 2H, n), 7.79 (d,  $^3J$  = 8.1 Hz, 2H, o), 7.02 (dd,  $^3J$  = 11.3,  $^4J$  = 1.6 Hz, 2H, e), 6.76 (s, 4H, h), 2.26 (s, 6H, j), 1.81 (s, 12H, k) ppm.

$^{13}\text{C}\{^1\text{H}\}$  NMR (151 MHz,  $\text{CDCl}_3$ ):  $\delta$  = 145.0 (d), 140.8 (g), 137.7 (i), 136.1 (f), 135.7 (b), 134.5 (m), 132.6 (e), 129.1 (p), 128.0 (n), 127.8 (h), 123.6 (c), 121.5 (o), 117.8 (l), 23.4 (k), 21.3 (j) ppm.

$^{11}\text{B}\{^1\text{H}\}$  NMR (193 MHz,  $\text{CDCl}_3$ ):  $\delta$  = 37.7 ppm.

IR (ATR):  $\tilde{\nu}$  [ $\text{cm}^{-1}$ ] = 3409 (w), 3019 (w), 2959 (m), 2919 (m), 2853 (w), 2360 (w), 2342 (w), 1608 (m), 1571 (s), 1538 (m), 1440 (s), 1344 (m), 1261 (m), 1261 (m), 1068 (m), 1026 (m), 845 (s), 815 (m), 802 (m), 691 (m), 660 (w).

HR-MS (EI, 70 eV,  $R \sim 10\ 000$ ):  $m/z$  (%) calc. for  $\text{C}_{36}\text{H}_{34}^{11}\text{B}_2\text{N}_2$  514.29752 [M]<sup>+</sup>, found 514.29664 [M]<sup>+</sup> (100).

M.p.: 220 °C.

$R_f$  (silica, eluents: 1% diethyl ether in cyclohexane): 0.12.

UV/Vis (DCM):  $\lambda_{\text{max}}$  ( $\epsilon$ ) = 283 nm (48 213 mol<sup>-1</sup> dm<sup>3</sup> cm<sup>-1</sup>).

Fluorescence (DCM):  $\lambda_{\text{ex}}$  = 370 nm,  $\lambda_{\text{em}}$  = 407, 428 nm.

### 2.1.8. 3,12-Dibromo-1,14-dihydro-2,13-dimesityl-1,14-diaza-2,13-diborapentahelicene (BN[5]-Br<sub>2</sub>)

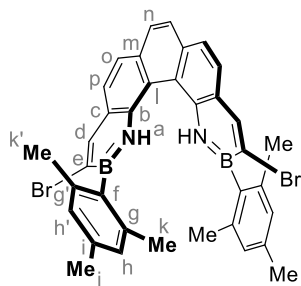

1,14-Dihydro-2,13-dimesityl-1,14-diaza-2,13-diborapentahelicene (BN[5], 51.6 mg, 100  $\mu\text{mol}$ , 1.00 equiv.) was dissolved in DCM (10 mL) and cooled to 0 °C. A solution of bromine (35.2 mg, 220  $\mu\text{mol}$ , 2.20 equiv.) in DCM (1.0 mL) was added over the course of 10 min and the solution was stirred at the same temperature for 2 h. Sodium thiosulfate (300 mg) was added and the mixture was stirred for 15 min at 25 °C. Afterwards, the mixture was filtered and the crude product was subjected to column chromatography (silica, eluents: cyclohexane  $\rightarrow$  5% diethyl ether in cyclohexane) to yield a yellow solid (50.7 mg, 75%).

$^1\text{H NMR}$  (601 MHz,  $\text{CDCl}_3$ ):  $\delta$  = 8.55 (s, 2H, d), 8.28 (br s, 2H, a), 7.87 (d,  $^3J$  = 8.2 Hz, 2H, p), 7.84 (s, 2H, n), 7.81 (d,  $^3J$  = 8.2 Hz, 2H, o), 6.92 (d,  $^4J$  = 1.6 Hz, 2H, h), 6.70 (d,  $^4J$  = 1.6 Hz, 2H, h'), 2.29 (s, 6H, j), 2.10 (s, 6H, k), 1.67 (s, 6H, k') ppm.

$^{13}\text{C}\{^1\text{H}\}$  NMR (151 MHz,  $\text{CDCl}_3$ ):  $\delta$  = 147.2 (d), 142.0 (g), 139.1 (g'), 138.2 (i), 135.2 (b), 134.9 (m), 134.5 (f), 130.4 (e), 128.7 (p), 128.3 (n), 127.8 (h), 127.3 (h'), 123.9 (c), 122.6 (o), 117.6 (l), 23.6 (k), 22.9 (k'), 21.4 (j) ppm.

$^{11}\text{B}\{^1\text{H}\}$  NMR (193 MHz,  $\text{CDCl}_3$ ):  $\delta$  = 36.4 ppm.

IR (ATR):  $\tilde{\nu}$  [ $\text{cm}^{-1}$ ] = 3400 (m), 2964 (w), 2945 (w), 2917 (w), 1610 (s), 1578 (m), 1563 (s), 1452 (m), 1417 (s), 1346 (m), 1218 (w), 1157 (w), 1018 (m), 914 (m), 841 (s), 815 (m), 690 (m).

HR-MS (ESI negative):  $m/z$  calc. for  $\text{C}_{36}\text{H}_{31}^{11}\text{B}_2^{79}\text{Br}_2\text{N}_2$  671.10612 [M-H]<sup>-</sup>, found 671.10626 [M-H]<sup>-</sup>.

M.p.: Decomposed at  $T > 310$  °C.

$R_f$  (silica, eluents: 2% diethyl ether in cyclohexane): 0.29.

### 2.1.9. 3,12-Dicyano-1,14-dihydro-2,13-dimesityl-1,14-diaza-2,13-diborapentahelicene (BN[5]-(CN)<sub>2</sub>)

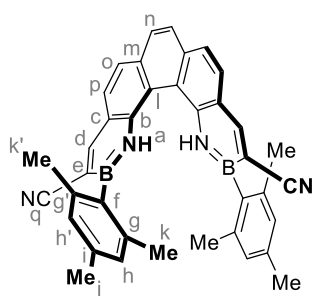

3,12-Dibromo-1,14-dihydro-2,13-dimesityl-1,14-diaza-2,13-diborapentahelicene (BN[5]-Br<sub>2</sub>, 10.1 mg, 15.0 μmol, 1.00 equiv.) and copper(I) cyanide (13.4 mg, 150 μmol, 10.0 equiv.) were placed in a 2 – 5 mL microwave vial. In a glove box, dry DMF (1 mL) was added. The solution was stirred for 19 h at 170 °C in an oil bath. After cooling, water (10 mL) and DCM (10 mL) were added and the phases were separated. The organic layer was washed with water (3 x 10 mL), dried over sodium sulfate, filtered and the solvent was removed in vacuo. The crude product was subjected to column chromatography (silica, eluent: DCM) to yield a yellow solid (5.2 mg, 62%).

<sup>1</sup>H NMR (601 MHz, CDCl<sub>3</sub>): δ = 8.69 (s, 2H, d), 8.35 (br s, 2H, a), 8.00 (d, <sup>3</sup>J = 8.3 Hz, 2H, p), 7.97 (s, 2H, n), 7.91 (d, <sup>3</sup>J = 8.3 Hz, 2H, o), 6.92 (s, 2H, h), 6.68 (s, 2H, h'), 2.28 (s, 6H, j), 2.07 (s, 6H, k), 1.66 (s, 6H, k') ppm.

<sup>13</sup>C{<sup>1</sup>H} NMR (151 MHz, CDCl<sub>3</sub>): δ = 154.4 (d), 142.0 (g), 139.1 (g'), 139.0 (i), 137.0 (b), 136.9 (m), 132.1 (f), 130.0 (p), 129.8 (n), 128.5 (h), 127.8 (h'), 123.3 (o), 122.2 (c), 121.2 (q), 117.3 (l), 113.1 (e), 23.4 (k), 23.0 (k'), 21.4 (j) ppm.

<sup>11</sup>B{<sup>1</sup>H} NMR (193 MHz, CDCl<sub>3</sub>): δ = 36.8 ppm.

IR (ATR):  $\tilde{\nu}$  [cm<sup>-1</sup>] = 3436 (w), 3423 (w), 3292 (w), 2962 (w), 2922 (w), 2853 (w), 2214 (m), 1608 (m), 1575 (s), 1540 (m), 1432 (m), 1377 (w), 1354 (w), 1233 (w), 1217 (w), 1159 (w), 963 (w), 844 (m), 740 (w), 687 (m).

HR-MS (ESI negative): *m/z* calc. for C<sub>38</sub>H<sub>31</sub><sup>11</sup>B<sub>2</sub>N<sub>4</sub> 565.27528 [M-H]<sup>-</sup>, found 565.27481 [M-H]<sup>-</sup>.

M.p.: Decomposed at T > 345 °C.

R<sub>f</sub> (silica, eluent: DCM): 0.61.

UV/Vis (DCM): λ<sub>max</sub> (ε) = 313 nm (27 991 mol<sup>-1</sup> dm<sup>3</sup> cm<sup>-1</sup>).

Fluorescence (DCM): λ<sub>ex</sub> = 370 nm, λ<sub>em</sub> = 424, 446 nm.

### 2.2. Synthetic Route towards BN[6]

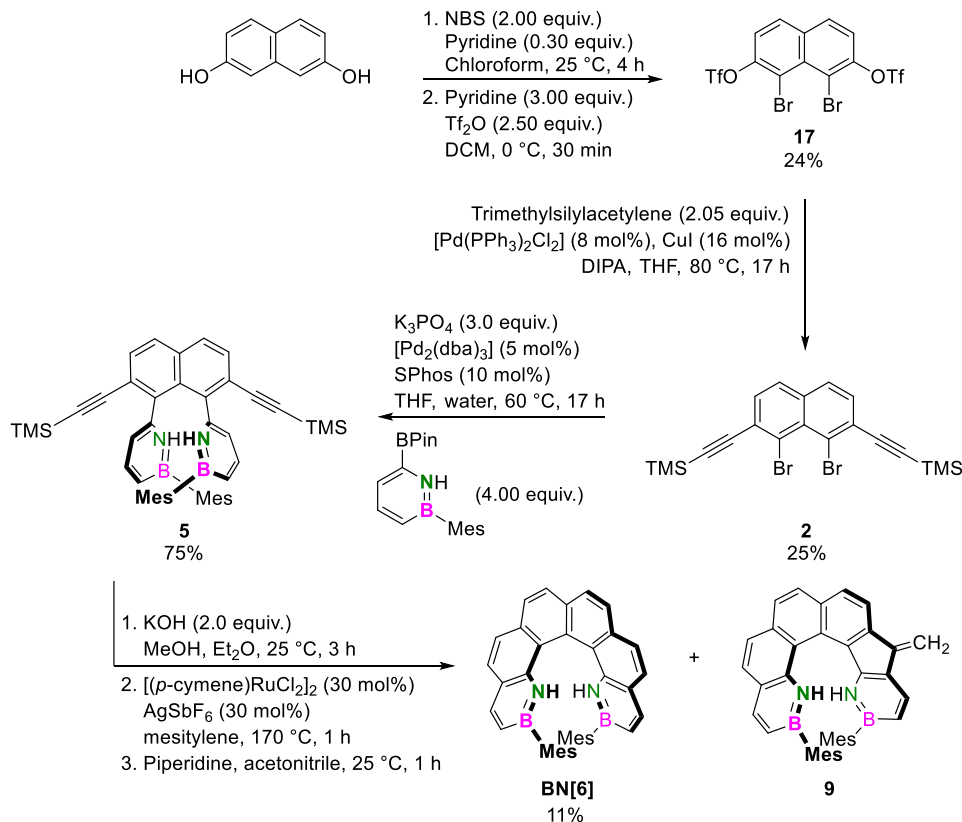

Scheme S2. Overview of the syntheses towards BN[6].



### 2.2.1. 1,8-Dibromo-2,7-bis(trifluoromethylsulfonyl)naphthalene (17)

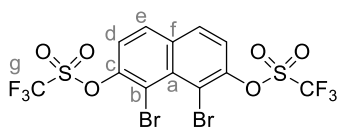

2,7-Dihydroxynaphthalene (12.8 g, 80.0 mmol, 1.00 equiv.), NBS (28.4 g, 160 mmol, 2.00 equiv.) and pyridine (1.88 g, 24.0 mmol, 0.30 equiv.) were dissolved in chloroform (500 mL). The solution was stirred for 4 h at 25 °C. It was washed with HCl (1 M, 3 x 150 mL) and water (3 x 100 mL). The combined organic layers were dried

over sodium sulfate and the solvent was removed in vacuo. The obtained yellow solid (13.7 g, 43.1 mmol, 1.00 equiv. under the assumption that solely species with two bromo substituents were present) was dissolved in DCM (200 mL). It was cooled to 0 °C, then pyridine (10.3 g, 129 mmol, 3.00 equiv.) was added at once and trifluoromethanesulfonic acid anhydride (30.4 g, 108 mmol, 2.50 equiv.) was added dropwise over the course of 10 min. The reaction was allowed to stir at 0 °C for 30 min. The mixture was washed with a sat. aq. sol. of NaHCO<sub>3</sub> (3 x 150 mL) and extracted with DCM (3 x 80 mL). The organic layer was washed with an aq. sol. of HCl (10%, 3 x 100 mL), dried over sodium sulfate and the solvent was removed in vacuo. The crude product was recrystallized from methanol twice (90 mL used, respectively) to yield colorless needles (6.00 g, 24%, Lit.<sup>13</sup>: 27%).

<sup>1</sup>H NMR (601 MHz, CDCl<sub>3</sub>): δ = 7.97 (d, <sup>3</sup>J = 9.0 Hz, 2H, e), 7.56 (d, <sup>3</sup>J = 9.0 Hz, 2H, d) ppm.

<sup>13</sup>C{<sup>1</sup>H} NMR: (151 MHz, CDCl<sub>3</sub>): δ = 148.5 (c), 134.1 (f), 131.3 (a), 131.0 (e), 122.0 (d), 118.8 (q, <sup>1</sup>J<sub>C-F</sub> = 320.7 Hz, g), 116.0 (b) ppm.

<sup>19</sup>F NMR: (565 MHz, CDCl<sub>3</sub>): δ = -73.2 ppm.

IR (ATR):  $\tilde{\nu}$  [cm<sup>-1</sup>] = 3112 (w), 3082 (w), 2852 (w), 2359 (w), 1590 (w), 1494 (w), 1428 (s), 1412 (m), 1322 (m), 1246 (m), 1233 (m), 1201 (s), 1178 (s), 1147 (s), 1131 (s), 991 (m), 873 (s), 844 (s), 832 (s), 775 (m), 770 (m), 727 (s), 696 (m).

HR-MS (EI, 70 eV, R ~ 10 000): *m/z* (%) calc. for C<sub>12</sub>H<sub>4</sub><sup>79</sup>Br<sub>2</sub>F<sub>6</sub>O<sub>6</sub>S<sub>2</sub> 579.77147 [M]<sup>+</sup>, found 579.77205 [M]<sup>+</sup> (25), 287.9 (100).

M.p.: 123 °C.

R<sub>f</sub> (silica, eluents: 7% diethyl ether in cyclohexane): 0.17.

### 2.2.2. 1,8-Dibromo-2,7-bis(trimethylsilylethynyl)naphthalene (2)

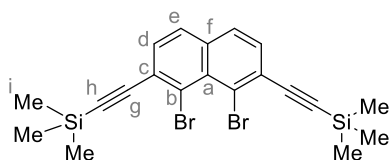

In a glove box, 1,8-dibromo-2,7-bis(trifluoromethylsulfonyl)naphthalene (17, 232 mg, 400 μmol, 1.00 eq), trimethylsilylacetylene (314 mg, 3.20 mmol, 8.00 equiv.), [Pd(dppf)Cl<sub>2</sub>] (14.6 mg, 20.0 μmol, 5 mol%), CuI (14.6 mg, 40.0 μmol, 10 mol%) were mixed and suspended in dry DMF and TEA (4.0 mL, respectively). The mixture was stirred for 17 h at 25 °C. The mixture was diluted

with DCM (50 mL) and washed with water (3 x 30 mL). The solvent was removed in vacuo and the residue was purified by column chromatography (silica, eluent: cyclohexane). Crystallization from methanol (2 mL) yielded a yellow solid (75.3 mg, 39%). The reaction was repeated on a 10.0 mmol scale, directly performing a crystallization from methanol (40 mL) without prior column chromatography (1.17 g, 25%).

<sup>1</sup>H NMR (600 MHz, CDCl<sub>3</sub>): δ = 7.65 (d, <sup>3</sup>J = 8.4 Hz, 2H, e), 7.51 (d, <sup>3</sup>J = 8.4 Hz, 2H, d), 0.31 (s, 18H, i) ppm.

<sup>13</sup>C{<sup>1</sup>H} NMR (151 MHz, CDCl<sub>3</sub>): δ = 135.5 (f), 130.6 (d), 130.4 (a), 128.4 (c), 128.3 (e), 123.9 (b), 105.0 (g), 102.6 (h), -0.1 (i) ppm.

<sup>29</sup>Si{<sup>1</sup>H} NMR (99 MHz, CDCl<sub>3</sub>): δ = -16.7 ppm.

IR (ATR):  $\tilde{\nu}$  [cm<sup>-1</sup>] = 2958 (w), 2898 (w), 2359 (w), 2342 (w), 2151 (w), 1494 (w), 1331 (w), 1244 (m), 1193 (m), 1182 (m), 1141 (m), 834 (s), 758 (s), 697 (s).

HR-MS (EI, 70 eV, R ~ 10 000): *m/z* (%) calc. for C<sub>20</sub>H<sub>22</sub><sup>79</sup>Br<sub>2</sub>Si<sub>2</sub> 475.96213 [M]<sup>+</sup>, found 475.96264 [M]<sup>+</sup> (43), 477.7 (100).

M.p.: 164 °C.

R<sub>f</sub> (silica, eluent: cyclohexane): 0.13.

### 2.2.3. 1,8-bis(6-(1-Hydro-2-mesityl)-1,2-azaborinyl)-2,7-bis((trimethylsilyl)ethynyl)naphthalene (5)

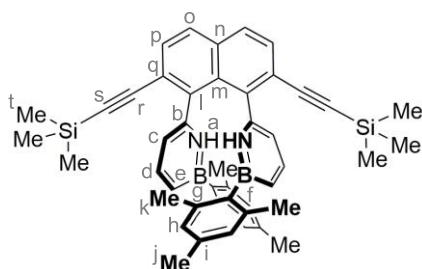

A pressure vial was charged with 1,8-dibromo-2,7-bis(trimethylsilyl)ethynyl)naphthalene (**2**, 163 mg, 340  $\mu\text{mol}$ , 1.00 equiv.), 2-mesityl-6-(4,4,5,5-tetramethyl-1,3,2-dioxaborolan-2-yl)-1,2-azaborinine (**3**, 439 mg, 1.36 mmol, 4.00 equiv.) and potassium phosphate (217 mg, 1.02 mmol, 3.00 mmol). In a glove box,  $[\text{Pd}_2(\text{dba})_3]$  (15.6 mg, 17.0  $\mu\text{mol}$ , 5 mol%), SPhos (14.0 mg, 34.1  $\mu\text{mol}$ , 10 mol%) and dry THF (15.3 mL) were added. Outside the glove box on a Schlenk line, degassed water (1.7 mL) was added and the reaction

mixture was degassed by bubbling Ar through it for 5 min. The reaction mixture was heated at 60  $^\circ\text{C}$  for 17 h. Water (10 mL) was added and the mixture was extracted with DCM (3 x 10 mL). The combined organic phases were concentrated in vacuo. The crude product was purified via column chromatography (silica, eluents: 1% diethyl ether in cyclohexane) to yield a yellow solid (182 mg, 75%).

$^1\text{H NMR}$  (600 MHz,  $\text{CDCl}_3$ ):  $\delta$  = 7.82 (d,  $^3J$  = 8.5 Hz, 2H, o), 7.60 (d,  $^3J$  = 8.5 Hz, 2H, p), 7.42 (dd,  $^3J$  = 11.2, 6.7 Hz, 2H, d), 7.20 (app br s, 2H, a),<sup>5</sup> 6.84 (s, 4H, h), 6.66 (ddd,  $^3J$  = 11.2 Hz,  $^4J$  = 2.1, 1.2 Hz, 2H, e), 6.16 (ddd,  $^3J$  = 6.7 Hz,  $^4J$  = 2.1, 1.1 Hz, 2H, c), 2.30 (s, 12H, k), 2.27 (s, 6H, j), 0.05 (s, 18H, t) ppm.

$^{13}\text{C}\{^1\text{H}\}$  NMR (151 MHz,  $\text{CDCl}_3$ ):  $\delta$  = 143.4 (d), 142.9 (b), 140.5 (g), 139.6 (l), 138.4 (f), 137.1 (i), 133.6 (n), 129.9 (p), 129.8 (m), 129.3 (o), 129.3 (e), 127.3 (h), 125.4 (q), 113.2 (c), 103.1 (r), 100.5 (s), 23.7 (k), 21.2 (j), -0.1 (t) ppm.

$^{11}\text{B}\{^1\text{H}\}$  NMR (193 MHz,  $\text{CDCl}_3$ ):  $\delta$  = 36.8 ppm.

$^{29}\text{Si}\{^1\text{H}\}$  NMR (99 MHz,  $\text{CDCl}_3$ ):  $\delta$  = -17.6 ppm.

IR (ATR):  $\tilde{\nu}$  [ $\text{cm}^{-1}$ ] = 3393 (w), 3349 (w), 3018 (w), 2958 (m), 2917 (w), 2856 (w), 2359 (w), 2342 (w), 2154 (m), 1610 (m), 1539 (s), 1447 (s), 1364 (w), 1250 (s), 1153 (w), 980 (w), 910 (w), 872 (s), 844 (s), 760 (s), 719 (m), 670 (w).

HR-MS (EI, 70 eV, R ~ 10 000):  $m/z$  (%) calc. for  $\text{C}_{46}\text{H}_{52}^{11}\text{B}_2\text{N}_2\text{Si}_2$  710.38654 [ $\text{M}$ ]<sup>+</sup>, found 710.38710 [ $\text{M}$ ]<sup>+</sup> (100).

M.p.: Decomposed at T > 250  $^\circ\text{C}$ .

R<sub>f</sub> (silica, eluents: 1% diethyl ether in cyclohexane): 0.14.

### 2.2.4. 1,16-Dihydro-2,15-dimesityl-1,16-diaza-2,15-diborahexahelicene (BN[6])

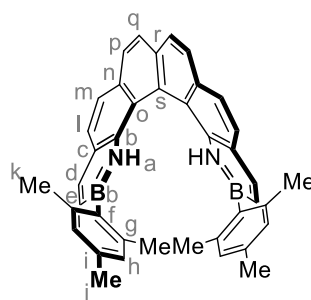

1,8-bis(6-(1-Hydro-2-mesityl)-1,2-azaborinyl)-2,7-bis((trimethylsilyl)ethynyl)naphthalene (**5**, 142 mg, 200  $\mu\text{mol}$ , 1.00 equiv.) was dissolved in methanol (50 mL) and diethyl ether (50 mL). Potassium hydroxide (22.4 mg, 400  $\mu\text{mol}$ , 2.00 equiv.) was added and the mixture was stirred for 3 h at 25  $^\circ\text{C}$ , when a quantitative deprotection was determined by TLC. Diethyl ether (50 mL) and brine (50 mL) were added, the phases were separated and the aqueous layer was extracted with diethyl ether (3 x 50 mL). The combined organic layers were washed with water (2 x 50 mL), dried over sodium sulfate, filtered, and the solvents were removed in vacuo. The crude product was placed

in a pressure vial. In a glove box,  $[(p\text{-cymene})\text{RuCl}_2]_2$  (36.7 mg, 60.0  $\mu\text{mol}$ , 30 mol%),  $\text{AgSbF}_6$  (20.6 mg, 60.0  $\mu\text{mol}$ , 30 mol%) and dry mesitylene (10 mL) were added. The mixture was heated at 170  $^\circ\text{C}$  for 1 h. After cooling, the mixture was filtered over silica and rinsed with toluene (100 mL) to remove the catalyst. The solvents were removed in vacuo the crude product was redissolved in acetonitrile (50 mL). Piperidine (3.0 mL) was added and the mixture was stirred for 1 h at 25  $^\circ\text{C}$  to derivatize the *endo/exo* side-product **9** (ratio <20%). The volatiles were removed in vacuo and the crude product was filtered over silica (eluents: 1% diethyl ether in cyclohexane) to yield a light brown solid (12.2 mg, 11%).

### Deprotected Alkyne (7):

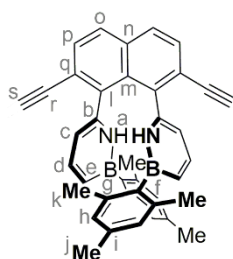

$^1\text{H NMR}$  (600 MHz,  $\text{CDCl}_3$ ):  $\delta$  = 7.87 (d,  $^3J$  = 8.5 Hz, 2H, o), 7.65 (d,  $^3J$  = 8.5 Hz, 2H, p), 7.51 (app br s, 2H, a),<sup>5</sup> 7.42 (dd,  $^3J$  = 11.2, 6.7 Hz, 2H, d), 6.85 (s, 4H, h), 6.64 (ddd,  $^3J$  = 11.2 Hz,  $^4J$  = 1.6, 1.6 Hz, 2H, e), 6.07 (ddd,  $^3J$  = 6.7 Hz,  $^4J$  = 1.6, 1.6 Hz, 2H, c), 3.04 (s, 2H, s), 2.29 (s, 12H, k), 2.28 (s, 6H, j) ppm.

$R_f$  (silica, eluents: 1% diethyl ether in cyclohexane) = 0.07.  $R_f$  (silica, eluents: 5% diethyl ether in cyclohexane) = 0.36.

### Helicene (BN[6]):

$^1\text{H NMR}$  (600 MHz,  $\text{CDCl}_3$ ):  $\delta$  = 8.70 (br s, 2H, a), 8.04 (d,  $^3J$  = 11.3 Hz, 2H, d), 7.95 (d,  $^3J$  = 8.3 Hz, 2H, p), 7.92 (d,  $^3J$  = 8.3 Hz, 2H, q), 7.73 (d,  $^3J$  = 8.4 Hz, 2H, l), 7.71 (d,  $^3J$  = 8.4 Hz, 2H, m), 6.87 (dd,  $^3J$  = 11.3 Hz,  $^4J$  = 1.7 Hz, 2H, e), 6.65 (s, 4H, h), 2.23 (s, 6H, j), 1.68 (s, 12H, k) ppm.

$^{13}\text{C}\{^1\text{H}\}$  NMR\* (151 MHz,  $\text{CDCl}_3$ ):  $\delta$  = 144.8 (d), 139.9 (g), 136.9 (i), 136.6 (b), 133.1 (n), 132.7 (r), 132.2 (e), 129.0 (l), 127.6 (p), 126.9 (q), 126.8 (h), 122.3 (c), 120.8 (m), 120.1 (s), 119.2 (o), 23.1 (k), 21.1 (j) ppm.

$^{11}\text{B}\{^1\text{H}\}$  NMR (193 MHz,  $\text{CDCl}_3$ ):  $\delta$  = 37.4 ppm.

IR (ATR):  $\tilde{\nu}$  [ $\text{cm}^{-1}$ ] = 3382 (w), 3018 (w), 2956 (m), 2922 (m), 2852 (m), 2359 (w), 1735 (w), 1609 (m), 1597 (m), 1581 (m), 1560 (m), 1540 (m), 1439 (s), 1349 (m), 1259 (m), 1153 (m), 1027 (m), 845 (s), 737 (m), 725 (m), 677 (w).

HR-MS (ESI positive):  $m/z$  calc. for  $\text{C}_{40}\text{H}_{37}^{11}\text{B}_2\text{N}_2$  567.31374  $[\text{M}+\text{H}]^+$ , found 567.31476  $[\text{M}+\text{H}]^+$ .

M.p.: Decomposed at  $T > 300$  °C.

$R_f$  (silica, eluents: 1% diethyl ether in cyclohexane): 0.26.

UV/Vis (DCM):  $\lambda_{\text{max}}$  ( $\epsilon$ ) = 280 nm (52 178  $\text{mol}^{-1} \text{dm}^3 \text{cm}^{-1}$ ).

Fluorescence (DCM):  $\lambda_{\text{ex}}$  = 370 nm,  $\lambda_{\text{em}}$  = 434, 459 nm.

\* The signal of the carbon atom f was not detected due to the presence of an adjacent boron atom.<sup>7-9</sup>

### 2.3. Synthetic Route towards CC[5]

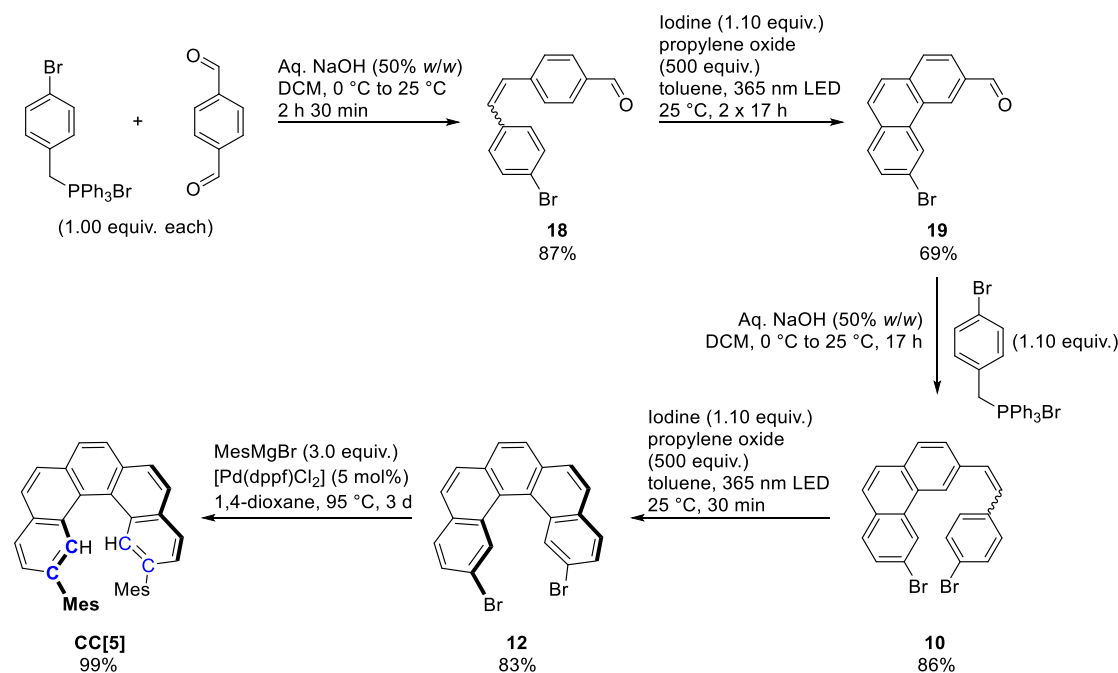

Scheme S3. Overview of the syntheses towards CC[5].

### 2.3.1. (*E*)/(*Z*)-4-Bromo-4'-formylstilbene (**18**)

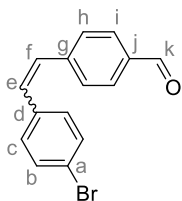

Terephthalaldehyde (804 mg, 6.00 mmol, 1.00 equiv.) and (4-bromobenzyl)triphenylphosphonium bromide (3.07 g, 6.00 mmol, 1.00 equiv.) were dissolved in DCM (100 mL) and cooled to 0 °C in an ice bath. An aqueous solution of sodium hydroxide (4.0 mL, 50% w/w) was added dropwise over the course of 5 min. After removal of the ice bath, the reaction was allowed to warm to 25 °C and stirring was continued for 2 h 30 min. Water (100 mL) was added and the phases were separated. The aqueous layer was extracted with DCM (3 x 30 mL). The combined organic layers were washed with water (2 x 50 mL), dried over sodium sulfate, filtered and the solvent was removed in vacuo. The crude product was filtered over silica (eluent: DCM) to remove triphenylphosphine oxide and further purified by column chromatography (silica, eluents: 50% DCM in *n*-hexane) to yield a slightly yellow solid/oil (1.49 g, 87%). The isomeric ratio of the crude product (*E/Z*) was 0.26/0.74. If desired, the *Z*-isomer (yellow oil at ambient conditions) can be collected isomerically pure as the first fraction.

#### (*Z*)-Isomer:

<sup>1</sup>H NMR (601 MHz, CDCl<sub>3</sub>): δ = 9.96 (s, 1H, k), 7.75 (d, <sup>3</sup>J = 8.2 Hz, 2H, i), 7.39 – 7.34 (m, 4H, h+b), 7.08 (d, <sup>3</sup>J = 8.5 Hz, 2H, c), 6.68 – 6.63 (m, 2H, f+e) ppm.

<sup>13</sup>C{<sup>1</sup>H} NMR (151 MHz, CDCl<sub>3</sub>): δ = 191.8 (k), 143.4 (g), 135.5 (d), 135.3 (j), 131.7 (b), 131.7 (e), 130.6 (c), 129.9 (i), 129.9 (f), 129.6 (h), 121.8 (a) ppm.

IR (ATR):  $\tilde{\nu}$  [cm<sup>-1</sup>] = 3046 (w), 3016 (w), 2824 (w), 2732 (w), 1694 (s), 1600 (s), 1581 (m), 1484 (s), 1304 (m), 1210 (s), 1166 (s), 1070 (s), 1008 (s), 970 (s), 884 (m), 824 (s), 796 (s), 670 (m).

HR-MS (EI, 70 eV, R ~ 10 000): *m/z* (%) calc. for C<sub>15</sub>H<sub>11</sub><sup>79</sup>BrO 285.99878 [M]<sup>+</sup>, found 285.99844 [M]<sup>+</sup> (40), 178.0 (100).

R<sub>f</sub> (silica, eluents: 50% DCM in *n*-hexane): 0.39.

#### (*E*)-Isomer:\*

<sup>1</sup>H NMR (600 MHz, CDCl<sub>3</sub>): δ = 10.00 (s, 1H), 7.87 (d, <sup>3</sup>J = 8.3 Hz, 2H), 7.64 (d, <sup>3</sup>J = 8.3 Hz, 2H), 7.51 (d, <sup>3</sup>J = 8.5 Hz, 2H), 7.40 (d, <sup>3</sup>J = 8.5 Hz, 2H), 7.19 (d, <sup>3</sup>J = 16.3 Hz, 1H), 7.12 (d, <sup>3</sup>J = 16.3 Hz, 1H) ppm.

R<sub>f</sub> (silica, eluents: 50% DCM in *n*-hexane): 0.46.

\* Because the (*E*)-isomer was not isolated, only the <sup>1</sup>H NMR shifts from the isomeric mixture could be analyzed.

### 2.3.2. 6-Bromo-3-formylphenanthrene (**19**)

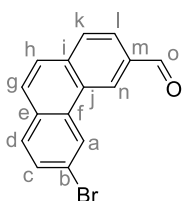

4-Bromo-4'-formylstilbene (**18**, 57.4 mg, 200 μmol, 1.00 equiv., isomeric mixture) was dissolved in toluene (120 mL). Iodine (55.8 mg, 220 μmol, 1.10 equiv.) and propylene oxide (7.00 mL, 100 mmol, 500 equiv.) were added and the mixture was degassed by bubbling Ar through it for 5 min. At 25 °C and under vigorous stirring, the mixture was irradiated for 2 x 17 h (see Section 1 for the photochemical setup). Four equal approaches were run and combined for the subsequent purification procedure. The volatiles were removed in vacuo and the crude product was subjected to filtration over silica (eluents: 50% DCM in *n*-hexane → DCM) to yield a colorless solid (185 mg, 69%).

<sup>1</sup>H NMR (600 MHz, CDCl<sub>3</sub>): δ = 10.26 (s, 1H, o), 9.05 (d, <sup>4</sup>J = 1.5 Hz, 1H, n), 8.87 (d, <sup>4</sup>J = 1.8 Hz, 1H, a), 8.09 (dd, <sup>3</sup>J = 8.2 Hz, <sup>4</sup>J = 1.5 Hz, 1H, l), 7.99 (d, <sup>3</sup>J = 8.2 Hz, 1H, k), 7.84 (d, <sup>3</sup>J = 8.8 Hz, 1H, g), 7.79 (app d, 2H, d+h), 7.75 (dd, <sup>3</sup>J = 8.5 Hz, <sup>4</sup>J = 1.8 Hz, 1H, c) ppm.

<sup>13</sup>C{<sup>1</sup>H} NMR (151 MHz, CDCl<sub>3</sub>): δ = 192.3 (o), 136.3 (i), 134.6 (m), 132.0 (f), 130.9 (e), 130.8 (c), 130.5 (d), 129.8 (g), 129.8 (k), 129.2 (j), 127.2 (n), 127.0 (h), 125.9 (l), 125.8 (a), 122.1 (b) ppm.

IR (ATR):  $\tilde{\nu}$  [cm<sup>-1</sup>] = 3064 (w), 2956 (w), 2925 (w), 2851 (w), 2810 (w), 2702 (w), 1698 (m), 1682 (s), 1608 (m), 1590 (m), 1497 (m), 1233 (m), 1198 (m), 1183 (m), 1075 (m), 906 (m), 843 (s), 786 (s), 705 (m).

HR-MS (EI, 70 eV, R ~ 10 000): *m/z* (%) calc. for C<sub>15</sub>H<sub>9</sub><sup>79</sup>BrO 283.98313 [M]<sup>+</sup>, found 283.98287 [M]<sup>+</sup> (65), 176.0 (100).

M.p.: 200 °C.

R<sub>f</sub> (silica, eluents: 50% DCM in *n*-hexane): 0.38.

### 2.3.3. (*E*)/(*Z*)-6-Bromo-3-(2-(4-bromophenyl)ethenyl)phenanthrene (10)

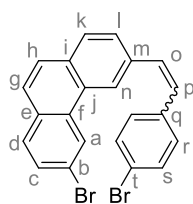

6-Bromo-3-formylphenanthrene (**19**, 114 mg, 400  $\mu$ mol, 1.00 equiv.) and (4-bromobenzyl)-triphenylphosphonium bromide (225 mg, 440  $\mu$ mol, 1.10 equiv.) were dissolved in DCM (40 mL) and cooled to 0 °C in an ice bath. An aqueous solution of sodium hydroxide (2.0 mL, 50% w/w) was added dropwise over the course of 5 min. After removal of the ice bath, the reaction was allowed to warm to 25 °C and stirring was continued for 17 h. Water (50 mL) was added and the phases were separated.

The aqueous layer was extracted with DCM (3 x 30 mL). The combined organic layers were dried over sodium sulfate, filtered and the solvent was removed in vacuo. The isomeric ratio of the crude product (*E/Z*) was 0.29/0.71. The crude mixture was filtered over silica (eluent: 10% DCM in *n*-hexane) to furnish a colorless solid (151 mg, 86%). If desired, the *Z*-isomer (colorless oil that slowly solidifies) can be collected isomerically pure by column chromatography as the first fraction, using an eluent mixture of 5% DCM in *n*-hexane.

#### (*Z*)-Isomer:

**<sup>1</sup>H NMR** (600 MHz, CDCl<sub>3</sub>):  $\delta$  = 8.54 (d, <sup>4</sup>*J* = 1.9 Hz, 1H, a), 8.46 (d, <sup>4</sup>*J* = 1.7 Hz, 1H, n), 7.73 (d, <sup>3</sup>*J* = 8.5 Hz, 1H, d), 7.71 (d, <sup>3</sup>*J* = 8.2 Hz, 1H, k), 7.69 (d, <sup>3</sup>*J* = 8.8 Hz, 1H, h), 7.68 – 7.63 (m, 2H, c+g), 7.46 (dd, <sup>3</sup>*J* = 8.2 Hz, <sup>4</sup>*J* = 1.7 Hz, 1H, l), 7.38 (d, <sup>3</sup>*J* = 8.4 Hz, 2H, s), 7.17 (d, <sup>3</sup>*J* = 8.4 Hz, 2H, r), 6.87 (d, <sup>3</sup>*J* = 12.1 Hz, 1H, o), 6.68 (d, <sup>3</sup>*J* = 12.1 Hz, 1H, p) ppm.

**<sup>13</sup>C{<sup>1</sup>H} NMR** (151 MHz, CDCl<sub>3</sub>):  $\delta$  = 136.3 (q), 135.5 (m), 131.8 (e), 131.7 (s), 131.5 (i), 131.1 (o), 130.8 (f), 130.7 (r), 130.2 (d), 130.0 (c), 130.0 (p), 129.3 (j), 128.6 (k), 128.1 (l), 127.2 (h), 126.6 (g), 125.6 (a), 123.3 (n), 121.4 (t), 121.1 (b) ppm.

**IR** (ATR):  $\tilde{\nu}$  [cm<sup>-1</sup>] = 3056 (w), 3012 (w), 2920 (w), 2849 (w), 1591 (m), 1483 (m), 1419 (m), 1068 (m), 1010 (m), 908 (m), 847 (s), 808 (m), 763 (m), 667 (m).

**HR-MS** (EI, 70 eV, R ~ 10 000): *m/z* (%) calc. for C<sub>22</sub>H<sub>14</sub><sup>79</sup>Br<sub>2</sub> 435.94568 [M]<sup>+</sup>, found 435.94577 [M]<sup>+</sup> (45), 437.9 (100).

**M.p.:** 132 °C.

**R<sub>f</sub>** (silica, eluents: 10% DCM in *n*-hexane): 0.49.

#### (*E*)-Isomer:\*

**<sup>1</sup>H NMR** (600 MHz, CDCl<sub>3</sub>):  $\delta$  = 8.85 (d, <sup>4</sup>*J* = 1.5 Hz, 1H), 8.63 (s, 1H), 7.88 (d, <sup>3</sup>*J* = 8.3 Hz, 1H), 7.84 (dd, <sup>3</sup>*J* = 8.3 Hz, <sup>4</sup>*J* = 1.6 Hz, 1H), 7.76 (d, <sup>3</sup>*J* = 8.5 Hz, 1H), 7.73 – 7.64 (m, 2H), 7.53 (d, <sup>3</sup>*J* = 8.5 Hz, 2H), 7.48 (d, <sup>3</sup>*J* = 8.5 Hz, 2H), 7.37 (d, <sup>3</sup>*J* = 16.3 Hz, 1H), 7.26 (d, <sup>3</sup>*J* = 16.3 Hz, 1H), 7.17 (d, <sup>3</sup>*J* = 8.4 Hz, 1H) ppm.

**R<sub>f</sub>** (silica, eluents: 10% DCM in *n*-hexane): 0.58.

\* Because the (*E*)-isomer was not isolated, only the <sup>1</sup>H NMR shifts from the isomeric mixture could be analyzed.

### 2.3.4. 2,13-Dibromopentahelicene (12)

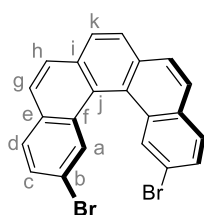

6-Bromo-3-(2-(4-bromophenyl)ethenyl)phenanthrene (**10**, 87.6 mg, 200  $\mu$ mol, 1.00 equiv.) was dissolved in toluene (120 mL). Iodine (55.8 mg, 220  $\mu$ mol, 1.10 equiv.) and propylene oxide (7.00 mL, 100 mmol, 500 equiv.) were added and the mixture was degassed by bubbling Ar through the reaction mixture for 5 min. At 25 °C and under vigorous stirring, the mixture was irradiated for 30 min (see Section 1 for the photochemical setup). After removing the solvents in vacuo, the crude product was washed with *n*-pentane (3 x 5 mL) via a frit to furnish a slightly yellow solid (72.4 mg, 83%).

**<sup>1</sup>H NMR** (600 MHz, CDCl<sub>3</sub>):  $\delta$  = 8.69 (d, <sup>4</sup>*J* = 1.9 Hz, 1H, a), 7.91 – 7.87 (m, 3H, g+h+k), 7.83 (d, <sup>3</sup>*J* = 8.5 Hz, 1H, d), 7.65 (dd, <sup>3</sup>*J* = 8.5 Hz, <sup>4</sup>*J* = 1.9 Hz, 1H, c) ppm.

**<sup>13</sup>C{<sup>1</sup>H} NMR** (151 MHz, CDCl<sub>3</sub>):  $\delta$  = 132.9 (i), 131.6 (f), 131.3 (e), 131.1 (a), 129.8 (c), 129.7 (d), 127.9 (k), 127.4 (g), 127.0 (h), 125.9 (j), 119.1 (b) ppm.

**<sup>1</sup>H NMR** (601 MHz, C<sub>6</sub>D<sub>6</sub>):  $\delta$  = 8.78 (d, <sup>4</sup>*J* = 1.8 Hz, 2H, a), 7.50 (s, 2H, k), 7.49 (d, <sup>3</sup>*J* = 8.5 Hz, 2H, h), 7.44 (d, <sup>3</sup>*J* = 8.5 Hz, 2H, g), 7.37 (dd, <sup>3</sup>*J* = 8.5 Hz, <sup>4</sup>*J* = 1.9 Hz, 2H, c), 7.26 (d, <sup>3</sup>*J* = 8.5 Hz, 2H, d) ppm.

**<sup>13</sup>C{<sup>1</sup>H} NMR** (151 MHz, C<sub>6</sub>D<sub>6</sub>):  $\delta$  = 133.2 (i), 131.9 (f), 131.5 (a), 131.5 (e), 129.9 (c), 129.8 (d), 128.0 (k), 127.6 (g), 126.9 (h), 126.2 (j), 119.4 (b) ppm.

**IR** (ATR):  $\tilde{\nu}$  [cm<sup>-1</sup>] = 3040 (w), 2953 (w), 2921 (w), 2851 (w), 1589 (m), 1474 (m), 1424 (m), 1294 (m), 1084 (m), 936 (m), 905 (m), 842 (s), 833 (s), 819 (s), 762 (m), 679 (m).

**HR-MS** (EI, 70 eV, R ~ 10 000):  $m/z$  (%) calc. for  $C_{22}H_{12}^{79}Br_2$  433.93003  $[M]^+$ , found 433.93059  $[M]^+$  (15), 276.0 (100).

**M.p.:** 259 °C (Lit.<sup>14</sup>: 227 °C).

**R<sub>f</sub>** (silica, eluents: 5% DCM in *n*-hexane) = 0.36.

### 2.3.5. 2,13-Dimesitylpentahelicene (CC[5])

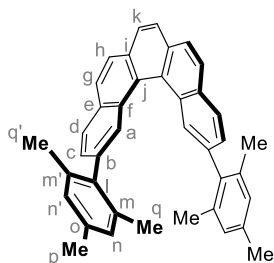

In a glove box, 2,13-dibromopentahelicene (**12**, 43.6 mg, 200  $\mu$ mol, 1.00 equiv.) and  $[Pd(dppf)Cl_2]$  (4.1 mg, 5.0  $\mu$ mol, 5 mol%) were suspended in dry 1,4-dioxane (12 mL) in a 10 – 20 mL microwave vial. Outside the glove box, a solution of mesitylmagnesium bromide (1 M in diethyl ether, 0.30 mL, 300  $\mu$ mol, 3.00 equiv.) was added while stirring. The mixture was heated at 95 °C for 3 d in an oil bath. After cooling, water (50 mL) and DCM (200 mL) were added, the phases were separated and the aqueous layer was extracted with DCM (3 x 50 mL). The combined organic phases were dried over sodium sulfate, filtered and the solvents were removed in vacuo. The crude product was filtered over silica (eluent: DCM) to yield a slightly yellow solid (51.0 mg, 99%).

**<sup>1</sup>H NMR** (601 MHz, DCM- $d_2$ ):  $\delta$  = 8.50 (d,  $^4J$  = 1.5 Hz, 2H, a), 7.94 (d,  $^3J$  = 8.5 Hz, 2H, g), 7.92 (d,  $^3J$  = 8.1 Hz, 2H, d), 7.90 (s, 2H, k), 7.89 (d,  $^3J$  = 8.5 Hz, 2H, h), 7.21 (dd,  $^3J$  = 8.1 Hz,  $^4J$  = 1.5 Hz, 2H, c), 6.95 (s, 2H, n), 6.74 (s, 2H, n'), 2.29 (s, 6H, p), 1.73 (s, 6H, q), 1.56 (s, 6H, q') ppm.

**<sup>13</sup>C{<sup>1</sup>H} NMR** (151 MHz, DCM- $d_2$ ):  $\delta$  = 138.7 (l), 137.8 (b), 137.0 (m), 136.7 (o), 135.4 (m'), 133.2 (i), 131.8 (e), 131.5 (f), 129.1 (c), 129.0 (n), 128.6 (a), 128.4 (d), 128.3 (n'), 128.0 (g), 127.9 (k), 127.6 (j), 126.7 (h), 22.1 (q), 21.1 (p), 20.6 (q') ppm.

**IR** (ATR):  $\tilde{\nu}$  [ $cm^{-1}$ ] = 3045 (w), 3008 (w), 2950 (w), 2916 (w), 2854 (w), 1612 (m), 1474 (m), 1437 (m), 1376 (w), 1250 (w), 1031 (w), 907 (m), 847 (s), 819 (w), 737 (w), 683 (w).

**HR-MS** (EI, 70 eV, R ~ 10 000):  $m/z$  (%) calc. for  $C_{40}H_{34}$  514.26550  $[M]^+$ , found 514.26535  $[M]^+$  (100).

**M.p.:** 282 °C.

**R<sub>f</sub>** (silica, eluents: 10% DCM in *n*-hexane) = 0.24.

**UV/Vis** (DCM):  $\lambda_{max}$  ( $\epsilon$ ) = 275 nm (34 207 mol<sup>-1</sup> dm<sup>3</sup> cm<sup>-1</sup>).

**Fluorescence** (DCM):  $\lambda_{ex}$  = 300 nm,  $\lambda_{em}$  = **409**, 425 nm.

## 2.4. Synthetic Route towards CC[6]

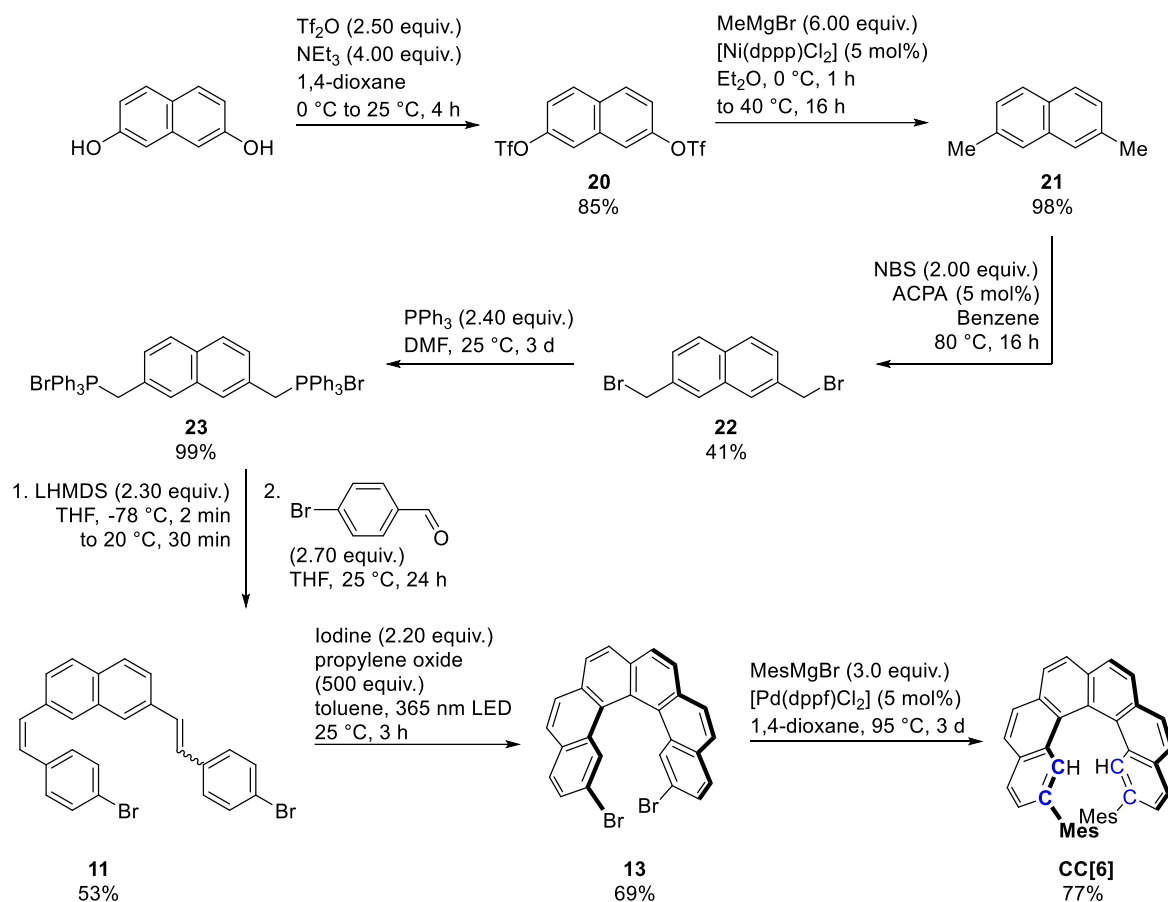

Scheme S4. Overview of the syntheses towards CC[6].

### 2.4.1. 2,7-bis(trifluoromethylsulfonyl)naphthalene (20)

2,7-Dihydroxynaphthalene (3.20 g, 20.0 mmol, 1.00 equiv.) and triethylamine (11.0 mL, 80.0 mmol, 4.00 equiv.) were dissolved in 1,4-dioxane (100 mL). The solution was cooled to 0 °C. *Via* an addition funnel, trifluoromethanesulfonic acid anhydride (8.41 mL, 50.0 mmol, 2.50 equiv.) was added over the course of 20 min.

The dark solution was allowed to warm to 25 °C and stirred for 4 h at this temperature. Subsequently, it was poured into 1 M aqueous HCl (50 mL). The resulting phases were separated and the aqueous phase was extracted with DCM (3 x 20 mL). The combined organic layers were washed with brine (30 mL), dried over sodium sulfate and filtered. The solvents were removed in vacuo and the crude product was purified by column chromatography (silica, eluents: 5% ethyl acetate in cyclohexane) to yield a colorless solid (7.13 g, 85%, Lit.<sup>15</sup>: 75%).

<sup>1</sup>H NMR (600 MHz, CDCl<sub>3</sub>): δ = 8.01 (d, <sup>3</sup>J = 9.0 Hz, 2H, e), 7.81 (d, <sup>4</sup>J = 2.4 Hz, 2H, b), 7.48 (dd, <sup>3</sup>J = 9.0 Hz, <sup>4</sup>J = 2.4 Hz, 2H, d) ppm.

<sup>13</sup>C{<sup>1</sup>H} NMR (151 MHz, CDCl<sub>3</sub>): δ = 148.4 (c), 133.8 (a), 131.4 (f), 131.0 (e), 121.3 (d), 119.6 (b), 118.9 (q, <sup>1</sup>J = 320.8 Hz, g) ppm.

<sup>19</sup>F NMR (565 MHz, CDCl<sub>3</sub>): δ = -72.7 ppm.

IR (ATR):  $\tilde{\nu}$  [cm<sup>-1</sup>] = 3096 (w), 1633 (w), 1511 (w), 1412 (s), 1204 (s), 1186 (s), 1133 (s), 1109 (s), 957 (s), 894 (s), 882 (s), 849 (s), 840 (s), 774 (m), 768 (m), 751 (m), 726 (s), 690 (m).

HR-MS (EI, 70 eV, R ~ 10 000): *m/z* (%) calc. for C<sub>12</sub>H<sub>6</sub>F<sub>6</sub>O<sub>6</sub>S<sub>2</sub> 423.95045 [M]<sup>+</sup>, found 423.95105 [M]<sup>+</sup> (46), 129.9 (100).

M.p.: 61 °C (Lit.<sup>15</sup>: 63 – 64 °C).

R<sub>f</sub> (silica, eluents: 5% ethyl acetate in cyclohexane): 0.27.

### 2.4.2. 2,7-Dimethylnaphthalene (21)

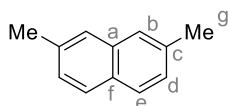

In a glove box, 2,7-bis(trifluoromethylsulfonyl)naphthalene (**20**, 5.94 g, 14.0 mmol, 1.00 equiv.) and [Ni(dppp)Cl<sub>2</sub>] (379 mg, 0.70 mmol, 5 mol%) were dissolved in dry diethyl ether (120 mL). Outside the box on a Schlenk line, the red solution was cooled to 0 °C and treated with a solution of methylmagnesium bromide (3 M in diethyl ether, 28.0 mL, 84.0 mmol, 6.00 equiv.) dropwise over the course of 60 min. The solution was heated at 40 °C for 16 h. Afterwards, it was cooled to 0 °C and water (25 mL) was added dropwise. After the addition of an aqueous solution of HCl (1 M, 50 mL), the phases were separated and the aqueous phase was extracted with diethyl ether (3 x 50 mL). The combined organic layers were washed with a sat. aq. sol. of sodium hydrogen carbonate (50 mL), dried over sodium sulfate and filtered. Evaporation of the solvent in vacuo gave a slightly yellow solid (2.15 g, 98%, Lit.<sup>15</sup>: 99%).

<sup>1</sup>H NMR (600 MHz, CDCl<sub>3</sub>): δ = 7.70 (d, <sup>3</sup>J = 8.3 Hz, 2H, e), 7.53 (s, 2H, b), 7.25 (d, <sup>3</sup>J = 8.3 Hz, 2H, d), 2.50 (s, 6H, g) ppm.

<sup>13</sup>C{<sup>1</sup>H} NMR (151 MHz, CDCl<sub>3</sub>): δ = 135.6 (c), 134.0 (a), 130.1 (f), 127.5 (e), 127.4 (d), 126.4 (b), 21.9 (g) ppm.

IR (ATR):  $\tilde{\nu}$  [cm<sup>-1</sup>] = 3047 (w), 3011 (w), 2909 (m), 2851 (w), 2721 (w), 1636 (w), 1615 (w), 1436 (m), 1375 (s), 1274 (m), 1178 (m), 1037 (m), 965 (m), 911 (s), 832 (s), 769 (m), 720 (m), 694 (m).

HR-MS (EI, 70 eV, R ~ 10 000): *m/z* (%) calc. for C<sub>12</sub>H<sub>12</sub> 156.09335 [M]<sup>+</sup>, found 156.09326 [M]<sup>+</sup> (100).

M.p.: 96 °C (Lit.<sup>15</sup>: 96 – 97 °C).

### 2.4.3. 2,7-bis(Bromomethyl)naphthalene (22)

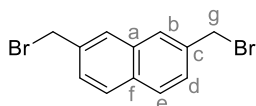

2,7-Dimethylnaphthalene (**21**, 1.80 g, 11.5 mmol, 1.00 equiv.), NBS (4.09 g, 23.0 mmol, 2.00 equiv.) and 4,4'-azobis(4-cyanopentanoic acid) (161 mg, 575 μmol, 5 mol%) were dissolved in benzene (10 mL) in a 10 – 20 mL microwave vial. The vial was capped and flushed with nitrogen for 5 min, before the mixture was heated at 80 °C for 16 h in an oil bath. After cooling, it was filtered over Celite (eluent: DCM) to remove precipitated succinimide. The solvents were removed in vacuo and the crude product was purified by column chromatography (silica, eluent: cyclohexane). Mixed fractions were recrystallized from methanol (24 mL). Combining clean fractions and removing the solvents in vacuo furnished a colorless solid (1.47 g, 41%).

<sup>1</sup>H NMR (600 MHz, CDCl<sub>3</sub>): δ = 7.82 (d, <sup>3</sup>J = 8.5 Hz, 2H, e), 7.82 – 7.79 (m, 2H, b), 7.52 (dd, <sup>3</sup>J = 8.5 Hz, <sup>4</sup>J = 1.8 Hz, 2H, d), 4.65 (s, 4H, g) ppm.

<sup>13</sup>C{<sup>1</sup>H} NMR (151 MHz, CDCl<sub>3</sub>): δ = 136.0 (c), 133.1 (a), 132.8 (f), 128.7 (e), 128.0 (b), 127.7 (d), 33.9 (g) ppm.

IR (ATR):  $\tilde{\nu}$  [cm<sup>-1</sup>] = 3022 (w), 2969 (w), 2853 (w), 1925 (w), 1814 (w), 1439 (m), 1345 (m), 1212 (s), 1183 (m), 1134 (m), 908 (s), 851 (s), 784 (m), 770 (m), 697 (m), 667 (m).

HR-MS (EI, 70 eV, R ~ 10 000): *m/z* (%) calc. for C<sub>12</sub>H<sub>10</sub><sup>79</sup>Br<sub>2</sub> 311.91438 [M]<sup>+</sup>, found 311.91433 [M]<sup>+</sup> (7), 154.0 (100).

M.p.: 150 °C (Lit.<sup>16</sup>: 146 – 147 °C).

R<sub>f</sub> (silica, eluent: cyclohexane): 0.24.

### 2.4.4. Naphthalene-2,7-bis(methylenetriphenylphosphonium) dibromide (23)

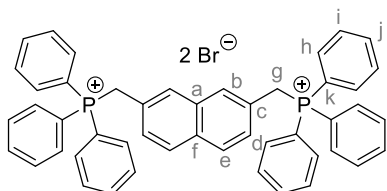

2,7-bis(Bromomethyl)naphthalene (**22**, 1.10 g, 3.50 mmol, 1.00 equiv.) and triphenyl phosphine (2.20 g, 8.40 mmol, 2.40 equiv.) were dissolved in DMF (11.0 mL) and stirred at 25 °C for 3 d. Toluene (33 mL) was added and the solution was stirred for 30 min. The colorless precipitation was filtered, washed with toluene (20 mL) and dried in a high vacuum (120 °C, 0.02 mbar). After 18 h, more precipitate was present in the mother liquor. It was filtered, washed with toluene (10 mL) and dried under the same conditions. A colorless solid (2.92 g, 99%, Lit.<sup>17</sup>: 99%) was obtained.

<sup>1</sup>H NMR (601 MHz, DMSO-*d*<sub>6</sub>): δ = 7.94 – 7.89 (m, 6H, j), 7.76 – 7.65 (m, 26H, e+h+i), 7.27 – 7.18 (m, 2H, b), 7.08 (ddd, <sup>3</sup>J = 8.6 Hz, <sup>4</sup>J = 1.6, 1.6 Hz, 2H, d), 5.36 (d, <sup>2</sup>J<sub>H-P</sub> = 16.1 Hz, 4H, g) ppm.



**$^{13}\text{C}\{^1\text{H}\}$  NMR** (151 MHz,  $\text{DMSO}-d_6$ ):  $\delta$  = 135.2 (j), 134.0 (d,  $^3J_{\text{C-P}} = 10.4$  Hz, h), 132.0 (a), 131.4 (f), 130.1 (d,  $^2J_{\text{C-P}} = 12.5$  Hz, i), 129.8 (d,  $^3J_{\text{C-P}} = 8.2$  Hz, b), 128.8 (d), 128.3 (e), 126.6 (d,  $^2J_{\text{C-P}} = 9.3$  Hz, c), 117.7 (d,  $^1J_{\text{C-P}} = 85.6$  Hz, k), 28.1 (d,  $^1J_{\text{C-P}} = 46.9$  Hz, g) ppm.

**$^{31}\text{P}\{^1\text{H}\}$  NMR** (243 MHz,  $\text{DMSO}-d_6$ ):  $\delta$  = 23.1 ppm.

**IR** (ATR):  $\tilde{\nu}$  [ $\text{cm}^{-1}$ ] = 3040 (w), 3007 (w), 2987 (w), 2846 (w), 2777 (w), 1660 (w), 1586 (w), 1435 (m), 1110 (s), 995 (m), 841 (m), 744 (s), 717 (s), 688 (s).

**HR-MS** (ESI positive):  $m/z$  calc. for  $\text{C}_{48}\text{H}_{40}\text{P}_2^{2+}$  339.12971  $[\text{M}-2\text{Br}]^{2+}$ ; found 339.12947  $[\text{M}-2\text{Br}]^{2+}$ .

**M.p.:** (348 °C, Lit.<sup>18</sup>: 364 – 367 °C).

#### 2.4.5. (*Z,Z*)/(*E,Z*)-2,7-bis(2-(4-Bromophenyl)ethenyl)naphthalene (11)

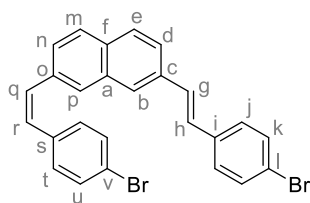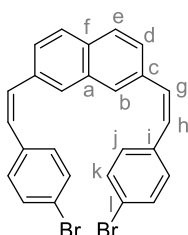

Naphthalene-2,7-bis(methylenetriphenylphosphonium) dibromide (**23**, 500 mg, 0.60 mmol, 1.00 equiv.) was suspended in dry THF (10 mL). An LHMDS solution (1.0 M in THF, 1.37 mL, 2.30 equiv.) was added at  $-78$  °C over the course of 2 min. The mixture was allowed to warm to 25 °C over 30 min, turning red. A solution of 4-bromobenzaldehyde (298 mg, 1.61 mmol, 2.70 equiv.) in dry THF (1.0 mL) was added and the color

changed to yellow/brown. The mixture was stirred for 24 h at 25 °C. The solvents were removed in vacuo and the crude solid was filtered over silica (eluent: DCM) to remove triphenylphosphine oxide. The solvents were removed in vacuo and remaining aldehyde was removed by Kugelrohr distillation (66 °C, 0.12 mbar). The isomeric ratio (*E,Z,Z,Z*) of crude product was 0.61/0.39. The crude product was purified by column chromatography (silica, eluents: 5% ethyl acetate in cyclohexane) to yield an off-white solid (155 mg, 53%, Lit.<sup>17</sup>: 65%). If desired, the (*Z,Z*)-isomer (off-white solid) can be collected isomerically pure as the first fraction.

##### **(*Z,Z*)-Isomer:**

**$^1\text{H}$  NMR** (601 MHz,  $\text{CDCl}_3$ ):  $\delta$  = 7.60 (m, 4H, b+e), 7.34 (d,  $^3J = 8.5$  Hz, 4H, k), 7.28 (dd,  $^3J = 8.4$  Hz,  $^4J = 1.7$  Hz, 2H, d), 7.14 (d,  $^3J = 8.5$  Hz, 4H, j), 6.76 (d,  $^3J = 12.2$  Hz, 2H, g), 6.59 (d,  $^3J = 12.2$  Hz, 2H, h) ppm.

**$^{13}\text{C}\{^1\text{H}\}$  NMR** (151 MHz,  $\text{CDCl}_3$ ):  $\delta$  = 136.2 (i), 134.9 (c), 133.6 (a), 131.9 (f), 131.5 (k), 130.9 (g), 130.7 (j), 129.5 (h), 128.2 (b), 127.6 (e), 127.1 (d), 121.3 (l) ppm.

**IR** (ATR):  $\tilde{\nu}$  [ $\text{cm}^{-1}$ ] = 3044 (w), 3010 (w), 2963 (w), 1904 (w), 1704 (w), 1623 (w), 1483 (s), 1069 (m), 1009 (s), 959 (m), 909 (s), 822 (s), 811 (s), 745 (s).

**HR-MS** (EI, 70 eV,  $R \sim 10\,000$ ):  $m/z$  (%) calc. for  $\text{C}_{26}\text{H}_{18}^{79}\text{Br}_2$  487.97698  $[\text{M}]^+$ , found 487.97751  $[\text{M}]^+$  (46), 489.9 (100).

**M.p.:** 134 °C.

**R<sub>f</sub>** (silica, eluents: 5% ethyl acetate in cyclohexane): 0.55.

##### **(*E,Z*)-Isomer:**

**$^1\text{H}$  NMR** (601 MHz,  $\text{CDCl}_3$ ):  $\delta$  = 7.76 (d,  $^3J = 8.5$  Hz, 1H), 7.73 (d,  $^4J = 1.5$  Hz, 1H), 7.71 – 7.68 (m, 2H), 7.65 (d,  $^3J = 8.4$  Hz, 1H), 7.50 (d,  $^3J = 8.4$  Hz, 2H), 7.42 (d,  $^3J = 8.4$  Hz, 2H), 7.34 (d,  $^3J = 8.4$  Hz, 2H), 7.29 (dd,  $^3J = 8.5$  Hz,  $^4J = 1.6$  Hz, 1H), 7.23 (d,  $^3J = 16.3$  Hz, 1H), 7.16 – 7.12 (m, 3H), 6.78 (d,  $^3J = 12.2$  Hz, 1H), 6.60 (d,  $^3J = 12.2$  Hz, 1H) ppm.

**R<sub>f</sub>** (silica, eluents: 5% ethyl acetate in cyclohexane): 0.64.

\* Because the (*E,Z*)-isomer was not isolated, only the  $^1\text{H}$  NMR shifts from the isomeric mixture could be analyzed.

#### 2.4.6. 2,15-Dibromohexahelicene (13)

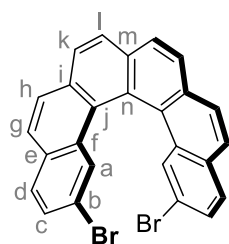

2,7-bis(2-(4-Bromophenyl)ethenyl)naphthalene (**11**, 98.0 mg, 200  $\mu\text{mol}$ , 1.00 equiv., isomeric mixture) was dissolved in toluene (120 mL). Iodine (112 mg, 440  $\mu\text{mol}$ , 2.20 equiv.) and propylene oxide (7.00 mL, 100 mmol, 500 equiv.) were added and the mixture was degassed by bubbling Ar through it for 5 min. At 25 °C and under vigorous stirring, the mixture was irradiated for 3 h (see Section 1 for the photochemical setup). After removing the solvents in vacuo, the crude product was washed with *n*-pentane and acetonitrile (3 x 5 mL, respectively) to furnish a colorless solid (66.8 mg, 69%).

**<sup>1</sup>H NMR** (601 MHz, CDCl<sub>3</sub>): δ = 8.04 (d, <sup>3</sup>J = 8.2 Hz, 2H, l), 8.00 (d, <sup>3</sup>J = 8.2 Hz, 2H, k), 7.96 (d, <sup>3</sup>J = 8.5 Hz, 2H, h), 7.92 (d, <sup>3</sup>J = 8.5 Hz, 2H, g), 7.74 (d, <sup>3</sup>J = 8.5 Hz, 2H, d), 7.71 (d, <sup>4</sup>J = 1.9 Hz, 2H, a), 7.39 (dd, <sup>3</sup>J = 8.5 Hz, <sup>4</sup>J = 1.9 Hz, 2H, c) ppm.

**<sup>13</sup>C{<sup>1</sup>H} NMR** (151 MHz, CDCl<sub>3</sub>): δ = 133.3 (m), 132.0 (i), 130.9 (g), 130.8 (f), 130.1 (a), 129.4 (d), 129.1 (c), 127.8 (l), 127.7 (g), 127.5 (k), 126.9 (h), 126.5 (j), 123.9 (n), 119.4 (b) ppm.

**IR** (ATR):  $\tilde{\nu}$  [cm<sup>-1</sup>] = 3041 (w), 2953 (w), 2922 (w), 2852 (w), 1589 (m), 1494 (m), 1468 (m), 1422 (m), 1276 (m), 1119 (m), 1077 (m), 994 (m), 914 (m), 901 (m), 844 (s), 840 (s), 826 (s), 812 (s), 768 (s), 700 (m), 663 (m).

**HR-MS** (EI, 70 eV, R ~ 10 000): *m/z* (%) calc. for C<sub>26</sub>H<sub>14</sub><sup>79</sup>Br<sub>2</sub> 483.94568 [M]<sup>+</sup>, found 483.94571 [M]<sup>+</sup> (45), 486.0 (100).

**M.p.:** 346 °C (Lit.<sup>19</sup>: 293 °C under decomposition).

**R<sub>f</sub>** (silica, eluent: cyclohexane) = 0.26.

#### 2.4.7. 2,15-Dimesitylhexahelicene (CC[6])

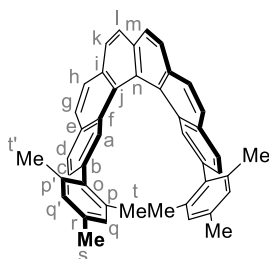

In a glove box, 2,15-dibromohexahelicene (**13**, 48.6 mg, 100 μmol, 1.00 equiv.) and [Pd(dppf)Cl<sub>2</sub>] (4.1 mg, 5.0 μmol, 5 mol%) were suspended in 1,4-dioxane (12 mL) in a 10–20 mL microwave vial. Outside the box on a Schlenk line, a solution of mesitylmagnesium bromide (1 M in diethyl ether, 0.30 mL, 300 μmol, 3.00 equiv.) was added while stirring. The mixture was heated at 95 °C for 3 d in an oil bath. After cooling, water (50 mL) and DCM (200 mL) were added, the phases were separated and the aqueous layer was extracted with DCM (3 x 50 mL). The combined organic phases were dried over sodium

sulfate, filtered and the solvents were removed in vacuo. The crude product was filtered over silica (eluent: DCM) and washed with *n*-pentane and acetonitrile (50 mL, respectively) via a frit to yield a slightly yellow solid (43.4 mg, 77%).

**<sup>1</sup>H NMR** (601 MHz, CDCl<sub>3</sub>): δ = 7.91 (d, <sup>3</sup>J = 8.2 Hz, 2H, l), 7.89 (d, <sup>3</sup>J = 8.2 Hz, 2H, k), 7.85 – 7.80 (m, 6H, d+g+h), 7.56 (d, <sup>4</sup>J = 1.5 Hz, 2H, a), 6.99 (dd, <sup>3</sup>J = 8.1 Hz, <sup>4</sup>J = 1.5 Hz, 2H, c), 6.76 (s, 2H, q), 6.65 (s, 2H, q'), 2.22 (s, 6H, s), 1.43 (s, 6H, t), 1.33 (s, 6H, t') ppm.

**<sup>13</sup>C{<sup>1</sup>H} NMR** (151 MHz, CDCl<sub>3</sub>): δ = 139.0 (o), 138.9 (b), 136.2 (r), 136.2 (p), 136.0 (p'), 132.9 (m), 131.3 (e), 131.2 (f), 130.7 (i), 128.7 (j), 128.3 (d/g)\*, 127.9 (c), 127.9 (d/g)\*, 127.7 (q'), 127.7 (a), 127.6 (q), 127.3 (k), 126.5 (l), 126.0 (h), 124.0 (n), 21.2 (t), 21.1 (s), 20.5 (t') ppm.

**<sup>1</sup>H NMR** (600 MHz, C<sub>6</sub>D<sub>6</sub>): δ = 8.01 (s, 2H, a), 7.67 (d, <sup>3</sup>J = 8.1 Hz, 2H), 7.60 (d, <sup>3</sup>J = 8.1 Hz, 2H), 7.57 – 7.53 (m, 4H), 7.44 (d, <sup>3</sup>J = 8.6 Hz, 2H), 6.98 (d, <sup>3</sup>J = 8.1 Hz, 2H), 6.84 (s, 2H, q), 6.50 (s, 2H, q'), 2.08 (s, 6H, s), 1.76 (s, 6H, t), 1.21 (s, 6H, t') ppm.

**IR** (ATR):  $\tilde{\nu}$  [cm<sup>-1</sup>] = 3015 (w), 2969 (w), 2851 (w), 1609 (w), 1469 (m), 1435 (m), 1375 (m), 1245 (w), 1118 (w), 1034 (w), 848 (s), 841 (s), 818 (m), 769 (m), 735 (m), 703 (m), 669 (m).

**HR-MS** (EI, 70 eV, R ~ 10 000): *m/z* (%) calc. for C<sub>44</sub>H<sub>36</sub> 564.28115 [M]<sup>+</sup>, found 564.28077 [M]<sup>+</sup> (100).

**M.p.:** > 400 °C.

**R<sub>f</sub>** (silica, eluents: 2% diethyl ether in cyclohexane) = 0.41. Note: Due to the poor solubility of this compound in most organic solvents, column chromatography is not suitable for purification of amounts larger than analytical scale.

**UV/Vis** (DCM): λ<sub>max</sub> (ε) = 266 nm (44 672 mol<sup>-1</sup> dm<sup>3</sup> cm<sup>-1</sup>).

**Fluorescence** (DCM): λ<sub>ex</sub> = 300 nm, λ<sub>em</sub> = **423**, 444 nm.

## 2.5. Optimization of the Ring Closure towards BN[5]

In a glove box, the deprotected alkyne (**6**, 1.00 equiv.) was mixed with the respective catalyst and co-catalyst (30 mol%, respectively) and dry mesitylene (1 mL) in a 2 – 5 mL microwave vial and heated at the below indicated temperature / time protocol in an oil bath. After cooling, most of the solvent was removed in vacuo. A solution of trimethoxybenzene (1.00 equiv.) in CDCl<sub>3</sub> was added and the conversions were determined by integrating and referencing the *NH*-signals of the formed species in the <sup>1</sup>H NMR spectra. The broad singlet at δ = 8.32 ppm represents **BN[5]** (*endo/endo*), while the signals at δ = 8.77 and 8.67 ppm represent the *endo/exo* derivative **8**. The *exo/exo* derivative was not found. The singlet at δ = 6.80 ppm is due to remaining mesitylene.

**Table S1.** Optimization scheme and <sup>1</sup>H NMR spectra of the crude mixtures from the electrophilic ring closure towards **BN[5]**.

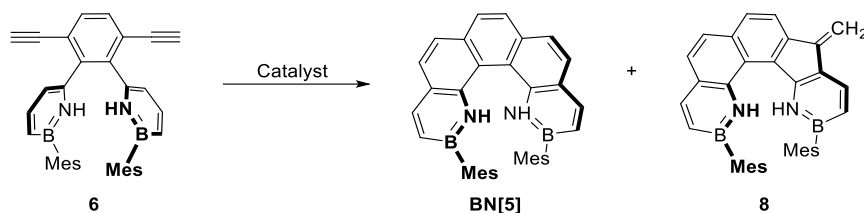

| Entry | Catalyst System                                             | Time, temperature | <i>endo/endo</i> | <i>endo/exo</i> |
|-------|-------------------------------------------------------------|-------------------|------------------|-----------------|
| a)    | AuBrPPh <sub>3</sub> / AgSbF <sub>6</sub>                   | 17 h, 100 °C      | 41%              | <5%             |
| b)    | AuCl <sub>3</sub>                                           | 17 h, 100 °C      | 66%              | <5%             |
| c)    | PtCl <sub>2</sub>                                           | 17 h, 100 °C      | 33%              | 28%             |
| d)    | [( <i>p</i> -Cymene)RuCl] <sub>2</sub> / AgSbF <sub>6</sub> | 17 h, 100 °C      | 44%              | 18%             |

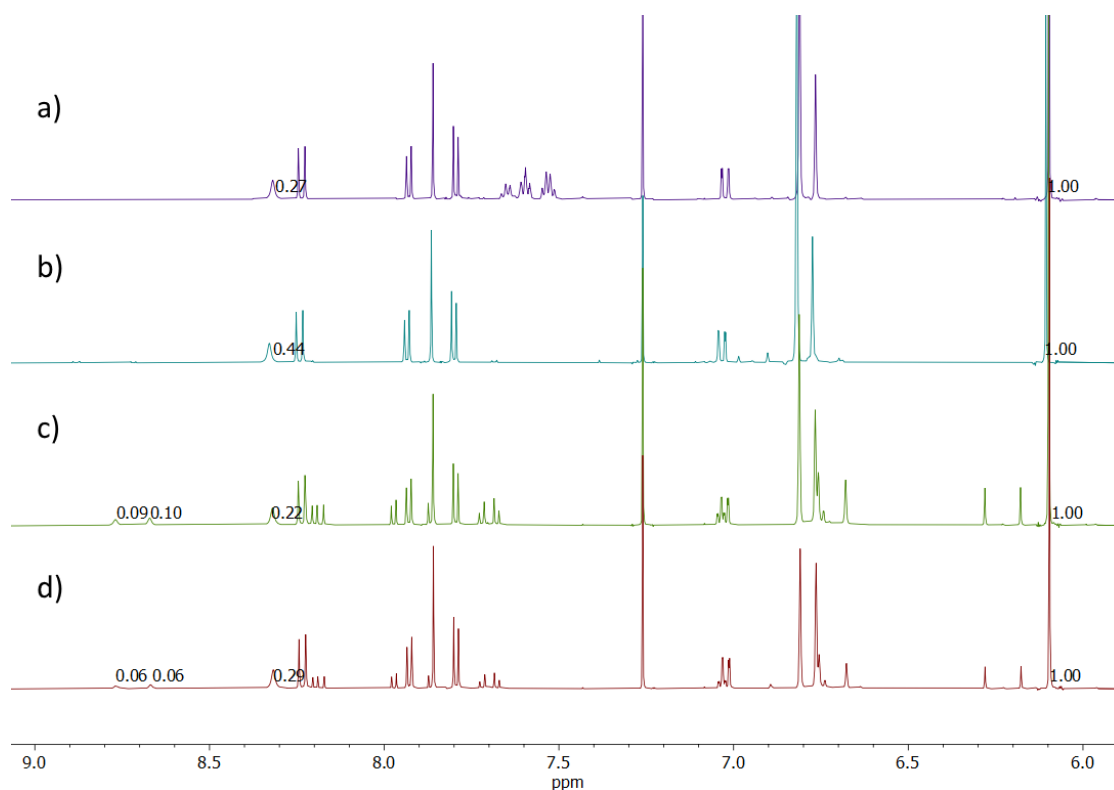

## 2.6. Optimization of the Ring Closure towards BN[6]

In a glove box, deprotected alkyne (**7**, 1.00 equiv.) was mixed with the respective catalyst and co-catalyst (30 mol%, respectively) and dry mesitylene (1 mL) in a 2 – 5 mL microwave vial and heated at the below indicated temperature / time protocol in an oil bath. After cooling, most of the solvent was removed in vacuo. A solution of trimethoxybenzene (1.00 equiv.) in CDCl<sub>3</sub> was added and the conversions were determined by integrating and referencing the *NH*-signals of

the formed species in the  $^1\text{H}$  NMR spectra. The broad singlet at  $\delta = 8.71$  ppm represents **BN[6]** (*endo/endo*), while the signal at  $\delta = 8.95$  ppm represents the *endo/exo* derivative **9**. The *exo/exo* derivative was not found. The singlet at  $\delta = 6.80$  ppm is due to remaining mesitylene. The broadened baselines and the throughout reduced conversions into ring-closed products indicate that decomposition occurs rapidly with all catalysts and temperature / time protocols.

**Table S2.** Optimization scheme and  $^1\text{H}$  NMR spectra of the crude mixtures from the electrophilic ring closure towards **BN[6]**.

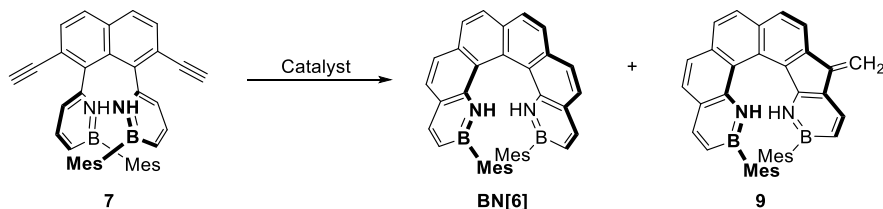

| Entry | Catalyst System                                    | Time, temperature | reactant | <i>endo/endo</i> | <i>endo/exo</i> |
|-------|----------------------------------------------------|-------------------|----------|------------------|-----------------|
| a)    | AuBrPPh <sub>3</sub> / AgSbF <sub>6</sub>          | 17 h, 140 °C      | -        | <2%              | 32%             |
| b)    | AuCl <sub>3</sub>                                  | 17 h, 140 °C      | -        | 8%               | 30%             |
| c)    | PtCl <sub>2</sub>                                  | 17 h, 140 °C      | -        | 5%               | 10%             |
| d)    | [(p-Cymene)RuCl] <sub>2</sub> / AgSbF <sub>6</sub> | 17 h, 140 °C      | -        | 12%              | <2%             |
| e)    | [(p-Cymene)RuCl] <sub>2</sub> / AgSbF <sub>6</sub> | 17 h, 100 °C      | 17%      | <2%              | <2%             |
| f)    | [(p-Cymene)RuCl] <sub>2</sub> / AgSbF <sub>6</sub> | 17 h, 170 °C      | -        | 10%              | <2%             |
| g)    | [(p-Cymene)RuCl] <sub>2</sub> / AgSbF <sub>6</sub> | 1 h, 170 °C       | -        | 15%              | <2%             |

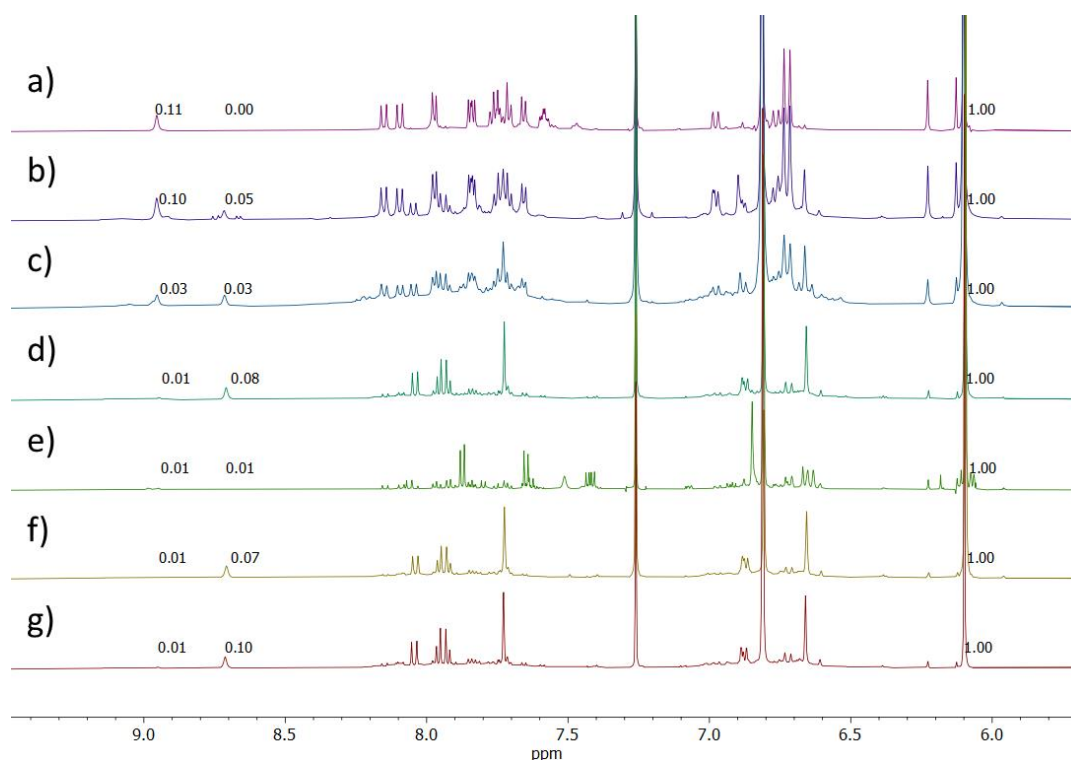

## 2.7. Isolation of *endo/exo* Hexahelicene (**9**)

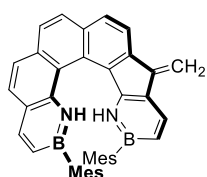

In a glove box, deprotected alkyne **7** (11.3 mg, 20.0  $\mu\text{mol}$ , 1.00 equiv.) was mixed with AuBrPPh<sub>3</sub> (3.2 mg, 6.0  $\mu\text{mol}$ , 30 mol%), AgSbF<sub>6</sub> (2.1 mg, 6.0  $\mu\text{mol}$ , 30 mol%) and dry mesitylene (1 mL) in a 2 – 5 mL microwave vial. The mixture was heated to 140 °C for 17 h in an oil bath. After cooling, the solvent was removed in vacuo. Subsequently, it was filtered over silica (eluent: cyclohexane) to obtain a bright, yellow solid (3.9 mg, 34%).

**<sup>1</sup>H NMR** (600 MHz, CDCl<sub>3</sub>): δ = 8.94 (br s, 1H), 8.14 (d, <sup>3</sup>J = 11.4 Hz, 1H), 8.09 (d, <sup>3</sup>J = 11.2 Hz, 1H), 7.99 – 7.94 (m, 2H), 7.85 – 7.81 (m, 2H), 7.75 (d, <sup>3</sup>J = 8.5 Hz, 1H), 7.70 (d, <sup>3</sup>J = 8.5 Hz, 1H), 7.65 (d, <sup>3</sup>J = 8.2 Hz, 1H), 6.97 (dd, <sup>3</sup>J = 11.4 Hz, <sup>4</sup>J = 1.8 Hz, 1H), 6.75 (dd, <sup>3</sup>J = 11.2 Hz, <sup>4</sup>J = 1.7 Hz, 1H), 6.73 (s, 2H), 6.71 (s, 2H), 6.22 (s, 1H), 6.12 (s, 1H), 2.22 (s, 3H), 2.22 (s, 3H), 1.88 (s, 6H), 1.82 (s, 6H) ppm.

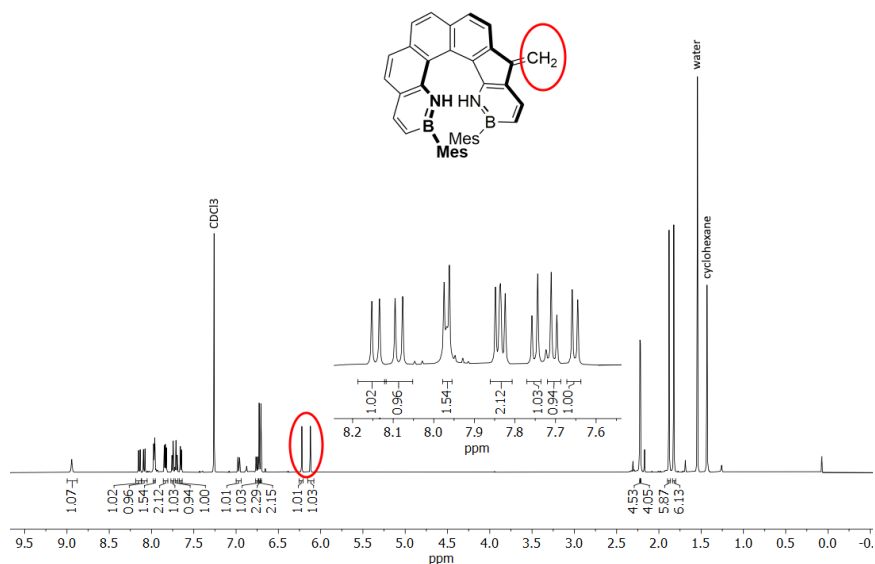

**Fig. S1.** <sup>1</sup>H NMR spectrum of the endo/exo derivative **9**, revealing two separate resonances for the exocyclic CH<sub>2</sub>-group.

## 2.8. Investigation of the Electrophilic Bromination of CC[5]

The reactivity of the carbohelicenes under electrophilic bromination conditions was tested by dissolving **CC[5]** (40 μmol, 1.0 equiv.) in DCM (5 mL) at 0 °C and adding bromine (84 μmol, 2.1 equiv.) dropwise. After stirring for 1 h at this temperature, the volatiles were removed *in vacuo* and the relatively pure 5,6-dibrominated addition product was detected by <sup>1</sup>H NMR spectroscopy, with few impurities in the aromatic region. These signals intensified after leaving the crude product in air for 7 d and heating it to 75 °C for 6 h in boiling chloroform. However, the characteristic aliphatic resonances of the Br<sub>2</sub>-adduct at δ ~ 5.8 ppm were still present. After additional heating of the crude product to 130 °C for 6 h in boiling toluene, the adduct signals had vanished and the mixture consisted of 5-brominated helicene as the major component, as well as the dehalogenated reactant **CC[5]**. Fig. S2 shows the respective <sup>1</sup>H NMR spectra of reactant, dibrominated adduct and mixture of reactant and 5-brominated product after heating.

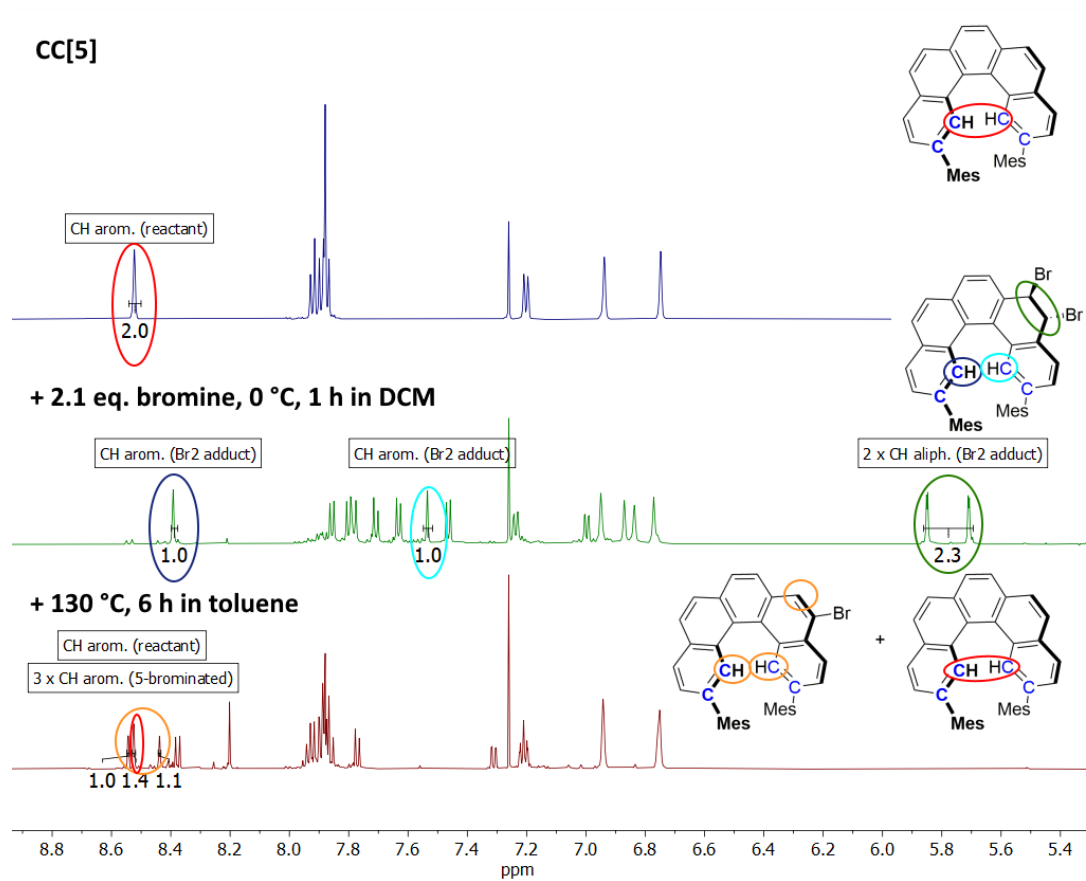

**Fig. S2.** Comparison of the <sup>1</sup>H NMR spectra before and after the electrophilic bromination of **CC[5]**.

### 3. Crystallography

#### 3.1. 1,14-Dihydro-2,13-dimesityl-1,14-diaza-2,13-diborapentahelicene (**BN[5]**)

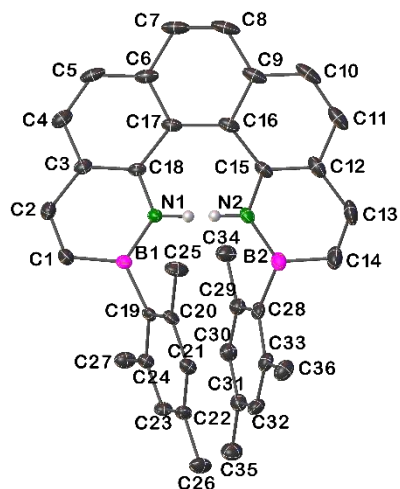

Colorless single crystals of  $C_{36}H_{34}B_2N_2$  (**BN[5]**) were grown by dissolving a small amount (ca. 5 mg) of the compound in DCM (ca. 1 mL) in a sample vial. Acetonitrile (ca. 5 mL) was added to a second, larger vial. The small vial was placed in the larger vial, which was capped. DCM was allowed to evaporate slowly at 25 °C, while letting the acetonitrile diffuse into the small vial over the course of 10 d. CCDC Deposition Number: 2192802.

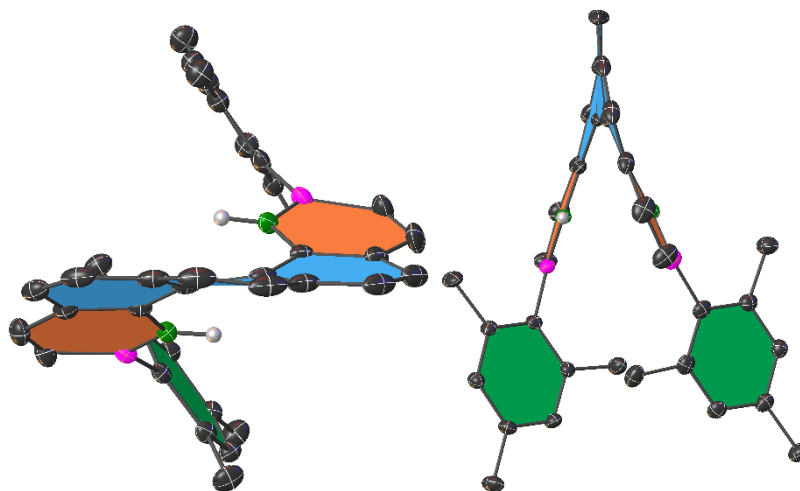

**Fig. S3.** Top view and view along the central phenyl-unit of **BN[5]**.

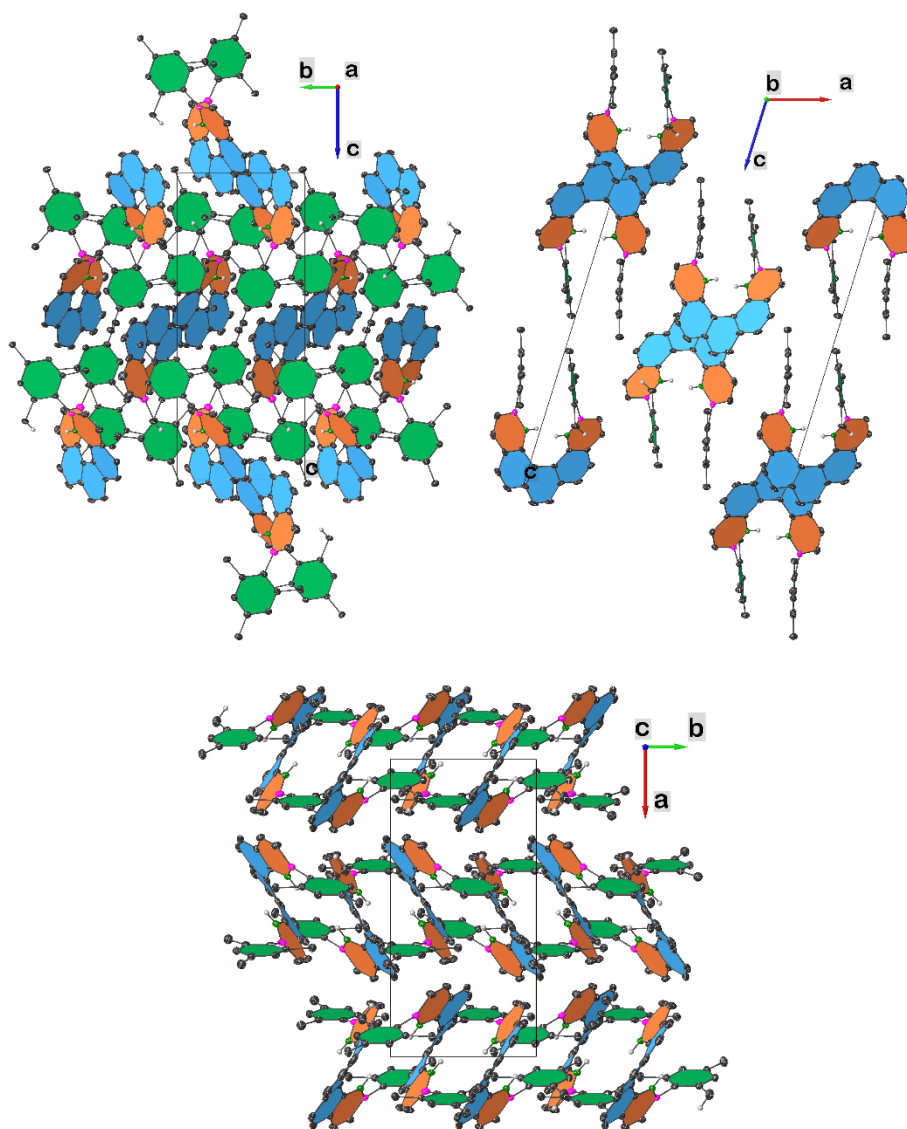

**Fig. S4.** Unit cell packing view of a **BN[5]** crystal along the a, b and c-axes.

**Table S3.** Crystal data and structure refinement for **BN[5]**.

|                                    |                                                               |
|------------------------------------|---------------------------------------------------------------|
| Empirical formula                  | C <sub>36</sub> H <sub>34</sub> B <sub>2</sub> N <sub>2</sub> |
| Formula weight                     | 516.27                                                        |
| Temperature/K                      | 100.0                                                         |
| Crystal system                     | monoclinic                                                    |
| Space group                        | P2 <sub>1</sub> /n                                            |
| a/Å                                | 17.5703(6)                                                    |
| b/Å                                | 8.2181(3)                                                     |
| c/Å                                | 20.6544(8)                                                    |
| α/°                                | 90                                                            |
| β/°                                | 107.2030(10)                                                  |
| γ/°                                | 90                                                            |
| Volume/Å <sup>3</sup>              | 2848.96(18)                                                   |
| Z                                  | 4                                                             |
| ρ <sub>calc</sub> /cm <sup>3</sup> | 1.204                                                         |
| μ/mm <sup>-1</sup>                 | 0.068                                                         |
| F(000)                             | 1096.0                                                        |
| Crystal size/mm <sup>3</sup>       | 0.4 × 0.2 × 0.15                                              |
| Radiation                          | MoKα (λ = 0.71073)                                            |
| 2θ range for data collection/°     | 4.854 to 56.564                                               |
| Index ranges                       | -23 ≤ h ≤ 23, -10 ≤ k ≤ 10,<br>-27 ≤ l ≤ 27                   |
| Reflections collected              | 87140                                                         |

|                                             |                                                                  |
|---------------------------------------------|------------------------------------------------------------------|
| Independent reflections                     | 7059 [R <sub>int</sub> = 0.0894,<br>R <sub>sigma</sub> = 0.0396] |
| Data/restraints/parameters                  | 7059/0/367                                                       |
| Goodness-of-fit on F <sup>2</sup>           | 1.041                                                            |
| Final R indexes [I ≥ 2σ (I)]                | R <sub>1</sub> = 0.0509, wR <sub>2</sub> = 0.1188                |
| Final R indexes [all data]                  | R <sub>1</sub> = 0.0714, wR <sub>2</sub> = 0.1283                |
| Largest diff. peak/hole / e Å <sup>-3</sup> | 0.33/-0.25                                                       |

**Table S4.** Fractional Atomic Coordinates (×10<sup>4</sup>) and Equivalent Isotropic Displacement Parameters (Å<sup>2</sup>×10<sup>3</sup>) for **BN[5]**. U<sub>eq</sub> is defined as 1/3 of the trace of the orthogonalized U<sub>ij</sub> tensor.

| Atom | x         | y          | z         | U <sub>eq</sub> |
|------|-----------|------------|-----------|-----------------|
| N1   | 3938.9(7) | 2968.0(14) | 6598.7(5) | 15.0(2)         |
| N2   | 5533.2(7) | 2190.9(15) | 6768.9(6) | 17.6(2)         |
| C18  | 3683.6(8) | 1786.1(17) | 6101.5(6) | 15.6(3)         |
| C24  | 4289.0(8) | 3950.1(17) | 8400.6(7) | 17.1(3)         |
| C19  | 4001.3(8) | 4517.2(17) | 7725.1(6) | 15.5(3)         |
| C22  | 4557.3(8) | 6723.9(18) | 8818.4(7) | 18.3(3)         |
| C20  | 4020.7(8) | 6200.3(18) | 7609.7(7) | 17.3(3)         |
| C23  | 4558.1(8) | 5052.8(18) | 8929.1(7) | 19.0(3)         |
| C3   | 3011.9(8) | 863.6(18)  | 6110.3(7) | 18.8(3)         |
| C17  | 4060.1(8) | 1553.4(17) | 5574.9(6) | 17.7(3)         |
| C21  | 4294.0(8) | 7275.5(18) | 8154.5(7) | 18.4(3)         |
| C16  | 4796.7(9) | 2318.7(17) | 5546.6(7) | 19.3(3)         |





| A   | B   | C   | D   | Angle/°     | A   | B   | C   | D   | Angle/°     |
|-----|-----|-----|-----|-------------|-----|-----|-----|-----|-------------|
| N1  | C18 | C3  | C2  | -2.36(19)   | C29 | C28 | B2  | N2  | 54.3(2)     |
| N1  | C18 | C17 | C16 | 9.2(2)      | C29 | C28 | B2  | C14 | -123.51(18) |
| N1  | C18 | C17 | C6  | -165.38(12) | C4  | C3  | C2  | C1  | -178.39(15) |
| N2  | C15 | C12 | C11 | 168.39(13)  | C28 | C33 | C32 | C31 | -0.1(2)     |
| N2  | C15 | C12 | C13 | -7.6(2)     | C28 | C29 | C30 | C31 | 0.7(2)      |
| C18 | N1  | B1  | C19 | 174.38(12)  | C6  | C17 | C16 | C15 | -154.58(14) |
| C18 | N1  | B1  | C1  | -4.3(2)     | C6  | C17 | C16 | C9  | 20.08(19)   |
| C18 | C3  | C4  | C5  | -5.6(2)     | C6  | C7  | C8  | C9  | 10.4(2)     |
| C18 | C3  | C2  | C1  | -1.0(2)     | C2  | C3  | C4  | C5  | 171.88(14)  |
| C18 | C17 | C16 | C15 | 30.9(2)     | C2  | C1  | B1  | N1  | 0.6(2)      |
| C18 | C17 | C16 | C9  | -154.43(13) | C2  | C1  | B1  | C19 | -178.00(14) |
| C18 | C17 | C6  | C5  | -14.2(2)    | C27 | C24 | C19 | C20 | -177.22(13) |
| C18 | C17 | C6  | C7  | 161.58(13)  | C27 | C24 | C19 | B1  | 7.10(19)    |
| C24 | C19 | C20 | C21 | -2.1(2)     | C27 | C24 | C23 | C22 | 179.01(13)  |
| C24 | C19 | C20 | C25 | 179.42(13)  | C5  | C6  | C7  | C8  | 174.09(14)  |
| C24 | C19 | B1  | N1  | -119.79(15) | C30 | C31 | C32 | C33 | -3.1(2)     |
| C24 | C19 | B1  | C1  | 58.73(19)   | C30 | C29 | C28 | C33 | -3.9(2)     |
| C19 | C24 | C23 | C22 | -0.1(2)     | C30 | C29 | C28 | B2  | 168.97(13)  |
| C19 | C20 | C21 | C22 | 0.5(2)      | C32 | C33 | C28 | C29 | 3.6(2)      |
| C20 | C19 | B1  | N1  | 64.77(19)   | C32 | C33 | C28 | B2  | -169.60(13) |
| C20 | C19 | B1  | C1  | -116.71(16) | C32 | C31 | C30 | C29 | 2.8(2)      |
| C23 | C24 | C19 | C20 | 1.90(19)    | C7  | C6  | C5  | C4  | -168.42(14) |
| C23 | C24 | C19 | B1  | -173.78(12) | C12 | C13 | C14 | B2  | 1.1(3)      |
| C23 | C22 | C21 | C20 | 1.3(2)      | C9  | C16 | C15 | N2  | -159.06(13) |
| C3  | C18 | C17 | C16 | -173.89(13) | C9  | C16 | C15 | C12 | 15.7(2)     |
| C3  | C18 | C17 | C6  | 11.51(19)   | C9  | C10 | C11 | C12 | 7.2(2)      |
| C3  | C4  | C5  | C6  | 3.0(2)      | C36 | C33 | C28 | C29 | -175.43(13) |
| C3  | C2  | C1  | B1  | 1.8(2)      | C36 | C33 | C28 | B2  | 11.3(2)     |
| C17 | C18 | C3  | C4  | -2.0(2)     | C36 | C33 | C32 | C31 | 178.99(14)  |
| C17 | C18 | C3  | C2  | -179.40(13) | C8  | C9  | C10 | C11 | -174.21(15) |
| C17 | C16 | C15 | N2  | 15.7(2)     | C34 | C29 | C28 | C33 | 177.84(13)  |
| C17 | C16 | C15 | C12 | -169.54(14) | C34 | C29 | C28 | B2  | -9.2(2)     |
| C17 | C16 | C9  | C8  | -12.1(2)    | C34 | C29 | C30 | C31 | 179.03(13)  |
| C17 | C16 | C9  | C10 | 170.93(13)  | C26 | C22 | C23 | C24 | 178.32(13)  |
| C17 | C6  | C5  | C4  | 7.4(2)      | C26 | C22 | C21 | C20 | -178.49(13) |
| C17 | C6  | C7  | C8  | -1.8(2)     | C25 | C20 | C21 | C22 | 179.04(13)  |
| C21 | C22 | C23 | C24 | -1.5(2)     | C10 | C9  | C8  | C7  | 173.78(15)  |
| C16 | C17 | C6  | C5  | 170.74(13)  | C35 | C31 | C30 | C29 | -176.40(14) |
| C16 | C17 | C6  | C7  | -13.5(2)    | C35 | C31 | C32 | C33 | 176.08(13)  |
| C16 | C15 | C12 | C11 | -6.6(2)     | C11 | C12 | C13 | C14 | -171.04(17) |
| C16 | C15 | C12 | C13 | 177.39(14)  | C13 | C12 | C11 | C10 | 170.80(15)  |
| C16 | C9  | C8  | C7  | -3.3(2)     | C13 | C14 | B2  | N2  | -3.9(2)     |
| C16 | C9  | C10 | C11 | 2.8(2)      | C13 | C14 | B2  | C28 | 174.10(16)  |
| C15 | N2  | B2  | C28 | -177.01(13) | B1  | N1  | C18 | C3  | 5.15(19)    |
| C15 | N2  | B2  | C14 | 1.0(2)      | B1  | N1  | C18 | C17 | -177.86(13) |

| A   | B   | C   | D   | Angle/°     | A  | B   | C   | D   | Angle/°    |
|-----|-----|-----|-----|-------------|----|-----|-----|-----|------------|
| C15 | C16 | C9  | C8  | 163.16(13)  | B1 | C19 | C20 | C21 | 173.38(12) |
| C15 | C16 | C9  | C10 | -13.9(2)    | B1 | C19 | C20 | C25 | -5.1(2)    |
| C15 | C12 | C11 | C10 | -5.2(2)     | B2 | N2  | C15 | C16 | 179.61(14) |
| C15 | C12 | C13 | C14 | 5.0(3)      | B2 | N2  | C15 | C12 | 4.7(2)     |
| C33 | C28 | B2  | N2  | -132.84(16) |    |     |     |     |            |

**Table S9.** Hydrogen Atom Coordinates ( $\text{\AA}\times 10^4$ ) and Isotropic Displacement Parameters ( $\text{\AA}^2\times 10^3$ ) for **BN[5]**.

| Atom | x       | y        | z        | U(eq) |
|------|---------|----------|----------|-------|
| H1   | 4332.6  | 3600.92  | 6572.22  | 18    |
| H2   | 5161.08 | 1524.13  | 6815.51  | 21    |
| H23  | 4748.52 | 4653.88  | 9380.02  | 23    |
| H21  | 4299.37 | 8410.01  | 8067.68  | 22    |
| H4   | 2265.2  | -964.67  | 5607.28  | 28    |
| H2A  | 2173.83 | 476.56   | 6620.46  | 28    |
| H27A | 3780.5  | 1743.63  | 8500.38  | 35    |
| H27B | 4644.88 | 1976.57  | 9031.49  | 35    |
| H27C | 4559.95 | 1566.42  | 8255.84  | 35    |
| H5   | 2739.8  | -1100.21 | 4684.99  | 30    |
| H30  | 6444.66 | -1674.78 | 8909.38  | 26    |
| H32  | 6687.64 | 2865.29  | 9682.41  | 26    |
| H7   | 3557.08 | 29.65    | 4015.36  | 35    |
| H1A  | 2647.88 | 2310.79  | 7482.12  | 29    |
| H36A | 6831.42 | 5067.56  | 8510.36  | 41    |
| H36B | 6270.63 | 5127.89  | 8995.44  | 41    |
| H36C | 5884.84 | 4942.38  | 8193.67  | 41    |
| H8   | 4467.71 | 1891.33  | 3890.04  | 37    |
| H34A | 5472.78 | -1220.78 | 7416.86  | 40    |
| H34B | 6288.61 | -2160.87 | 7766.7   | 40    |
| H34C | 6272.21 | -701.58  | 7249.71  | 40    |
| H26A | 4458.11 | 7855.43  | 9676.65  | 39    |
| H26B | 4858.48 | 8987.99  | 9237.55  | 39    |
| H26C | 5363.43 | 7556.3   | 9692.41  | 39    |
| H25A | 4161.23 | 6851.47  | 6689.31  | 40    |
| H25B | 3570.62 | 8036.03  | 6925.23  | 40    |
| H25C | 3274.39 | 6269.07  | 6631.35  | 40    |
| H10  | 5619.17 | 3620.45  | 4386.23  | 36    |
| H35A | 6429.77 | -622.18  | 10237.78 | 41    |
| H35B | 7142.43 | 670.17   | 10440.5  | 41    |
| H35C | 7278.99 | -1073.7  | 10148.4  | 41    |
| H11  | 6493.77 | 4853.42  | 5307.11  | 35    |
| H13  | 7106.62 | 4986.49  | 6541.16  | 38    |
| H14  | 7204.95 | 4138.81  | 7616.49  | 39    |

### 3.2. 3,12-Dibromo-1,14-dihydro-2,13-dimesityl-1,14-diaza-2,13-diborapentahelicene (**BN[5]-Br<sub>2</sub>**)

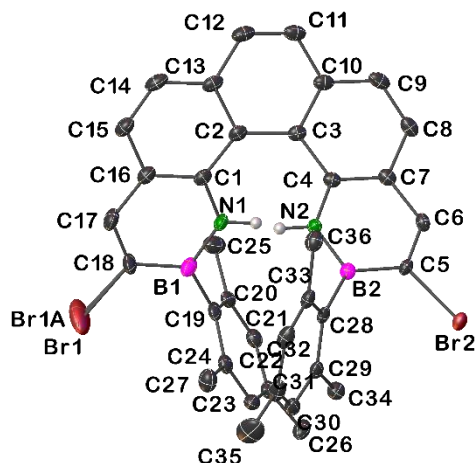

Colorless single crystals of  $\text{C}_{36}\text{H}_{32}\text{B}_2\text{Br}_2\text{N}_2$  (**BN[5]-Br<sub>2</sub>**) were grown by dissolving a small amount (ca. 5 mg) of the compound in DCM (ca. 1 mL) in a sample vial. Ethanol (ca. 5 mL) was added to a second, larger vial. The small vial was

placed in the larger vial, which was capped. DCM was allowed to evaporate slowly at 25 °C, while letting the ethanol diffuse into the small vial over the course of 5 d. CCDC Deposition Number: 2212001. Disorder for atom Br1 was modelled over two positions.

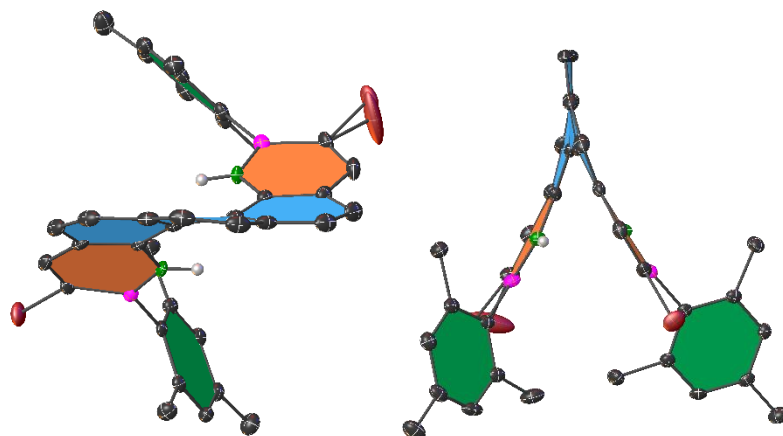

Fig. S5. Top view and view along the central phenyl-unit of BN[5]-Br<sub>2</sub>.

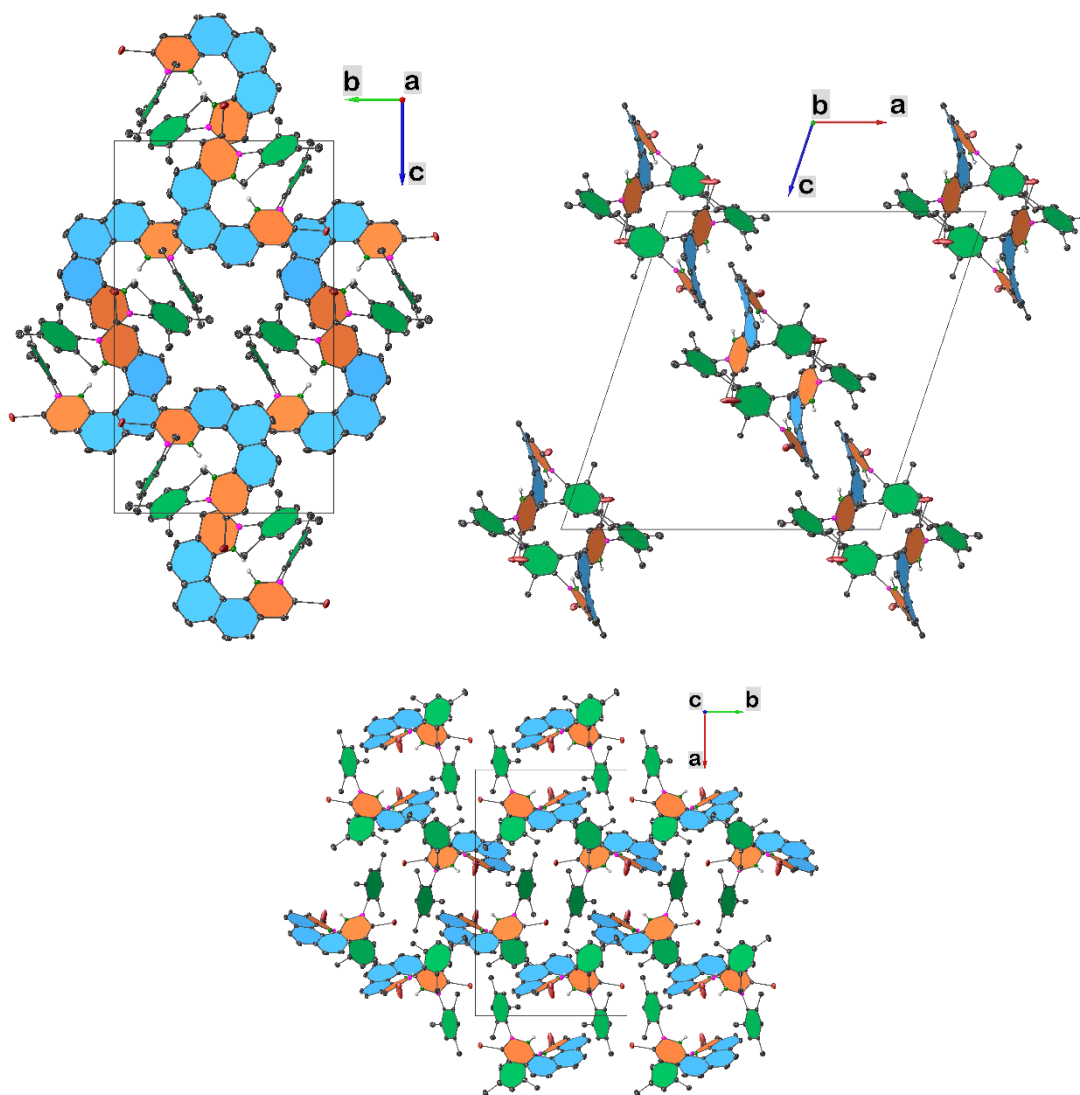

Fig. S6. Unit cell packing view of a BN[5]-Br<sub>2</sub> crystal along the a, b and c-axes.

**Table S10.** Crystal data and structure refinement for **BN[5]-Br<sub>2</sub>**.

|                                             |                                                                               |
|---------------------------------------------|-------------------------------------------------------------------------------|
| Empirical formula                           | C <sub>36</sub> H <sub>32</sub> B <sub>2</sub> Br <sub>2</sub> N <sub>2</sub> |
| Formula weight                              | 674.07                                                                        |
| Temperature/K                               | 100.00                                                                        |
| Crystal system                              | monoclinic                                                                    |
| Space group                                 | P2 <sub>1</sub> /n                                                            |
| a/Å                                         | 21.8649(9)                                                                    |
| b/Å                                         | 12.8104(8)                                                                    |
| c/Å                                         | 22.9768(11)                                                                   |
| $\alpha$ /°                                 | 90                                                                            |
| $\beta$ /°                                  | 108.440(2)                                                                    |
| $\gamma$ /°                                 | 90                                                                            |
| Volume/Å <sup>3</sup>                       | 6105.3(5)                                                                     |
| Z                                           | 8                                                                             |
| $\rho_{\text{calc}}/\text{cm}^{-3}$         | 1.467                                                                         |
| $\mu/\text{mm}^{-1}$                        | 2.684                                                                         |
| F(000)                                      | 2736.0                                                                        |
| Crystal size/mm <sup>3</sup>                | 0.505 × 0.449 × 0.108                                                         |
| Radiation                                   | MoK $\alpha$ ( $\lambda = 0.71073$ )                                          |
| 2 $\theta$ range for data collection/°      | 4.448 to 56.648                                                               |
| Index ranges                                | -29 ≤ h ≤ 29, -17 ≤ k ≤ 17, -30 ≤ l ≤ 30                                      |
| Reflections collected                       | 108189                                                                        |
| Independent reflections                     | 15165 [R <sub>int</sub> = 0.0782, R <sub>sigma</sub> = 0.0532]                |
| Data/restraints/parameters                  | 15165/0/804                                                                   |
| Goodness-of-fit on F <sup>2</sup>           | 1.031                                                                         |
| Final R indexes [ $l > 2\sigma(l)$ ]        | R <sub>1</sub> = 0.0423, wR <sub>2</sub> = 0.0853                             |
| Final R indexes [all data]                  | R <sub>1</sub> = 0.0696, wR <sub>2</sub> = 0.0957                             |
| Largest diff. peak/hole / e Å <sup>-3</sup> | 1.73/-0.91                                                                    |

**Table S11.** Fractional Atomic Coordinates ( $\times 10^4$ ) and Equivalent Isotropic Displacement Parameters ( $\text{\AA}^2 \times 10^3$ ) for **BN[5]-Br<sub>2</sub>**. U<sub>eq</sub> is defined as 1/3 of the trace of the orthogonalized U<sub>ij</sub> tensor.

| Atom | x          | y           | z          | U <sub>eq</sub> |
|------|------------|-------------|------------|-----------------|
| Br2  | 2684.7(2)  | 4636.8(2)   | 6515.2(2)  | 21.79(7)        |
| Br3  | 3791.0(2)  | 5327.8(2)   | 2570.3(2)  | 26.97(8)        |
| N2   | 2133.8(11) | 1437.9(16)  | 6294.0(10) | 14.9(4)         |
| N4   | 3467.3(11) | 9562.2(16)  | 4039.6(10) | 15.1(4)         |
| N3   | 3903.9(10) | 8483.2(17)  | 3141.7(10) | 13.8(4)         |
| N1   | 1156.6(11) | 164.9(16)   | 6551.6(11) | 17.9(5)         |
| C55  | 4745.8(12) | 7039.3(18)  | 3623.4(11) | 13.4(5)         |
| C60  | 4746.6(13) | 6446.1(19)  | 4137.1(12) | 16.2(5)         |
| C5   | 2592.0(12) | 3172.5(19)  | 6619.0(11) | 15.4(5)         |
| C54  | 3638.5(13) | 6778.0(19)  | 2633.3(12) | 17.0(5)         |
| C37  | 3391.9(12) | 8959.5(19)  | 2700.1(11) | 14.0(5)         |
| C6   | 2997.3(12) | 2730(2)     | 7129.9(11) | 16.7(5)         |
| C38  | 3276.1(12) | 10053(2)    | 2706.4(11) | 15.4(5)         |
| C56  | 5334.4(13) | 7243.9(18)  | 3524.2(11) | 15.1(5)         |
| C28  | 1701.6(13) | 2846.4(18)  | 5457.0(11) | 15.6(5)         |
| C7   | 3007.9(12) | 1629(2)     | 7226.3(11) | 16.3(5)         |
| C52  | 3029.1(12) | 8335(2)     | 2208.0(11) | 16.7(5)         |
| C58  | 5917.0(13) | 6343.6(19)  | 4467.0(12) | 16.8(5)         |
| C53  | 3146.7(12) | 7232(2)     | 2197.7(11) | 18.5(5)         |
| C10  | 3184.7(13) | -538(2)     | 7293.0(12) | 18.7(5)         |
| C65  | 3293.1(14) | 7511(2)     | 5123.8(11) | 20.0(6)         |
| C57  | 5910.5(12) | 6894.8(19)  | 3944.7(11) | 16.1(5)         |
| C4   | 2559.3(12) | 975(2)      | 6813.6(11) | 15.4(5)         |
| C8   | 3528.9(13) | 1176(2)     | 7696.0(12) | 19.4(5)         |
| C59  | 5327.3(13) | 6117.7(19)  | 4551.0(12) | 17.0(5)         |
| C19  | 262.6(12)  | 1344(2)     | 6719.1(13) | 19.8(6)         |
| C40  | 3701.1(12) | 10470.1(19) | 3862.7(11) | 15.1(5)         |
| C33  | 1843.5(13) | 2444(2)     | 4940.6(12) | 19.0(5)         |
| C2   | 2107.3(13) | -880.8(19)  | 6553.6(11) | 17.0(5)         |
| C24  | 9.7(13)    | 2248(2)     | 6380.1(12) | 20.2(6)         |
| C13  | 2314.3(14) | -1905(2)    | 6475.5(12) | 20.1(6)         |
| C39  | 3562.7(12) | 10751(2)    | 3229.7(12) | 16.0(5)         |
| C49  | 2908.7(13) | 10513(2)    | 2143.1(12) | 20.2(6)         |

|      |            |             |            |           |
|------|------------|-------------|------------|-----------|
| C11  | 3341.7(14) | -1609(2)    | 7251.0(13) | 22.8(6)   |
| C1   | 1429.2(13) | -695.2(19)  | 6355.6(12) | 17.2(5)   |
| C29  | 1179.9(13) | 3542.9(19)  | 5354.5(12) | 17.6(5)   |
| C22  | -65.4(12)  | 3111(2)     | 7294.7(13) | 19.4(5)   |
| C16  | 998.3(14)  | -1433(2)    | 5987.9(12) | 20.5(6)   |
| C64  | 3041.3(13) | 8333.5(19)  | 4709.8(11) | 17.4(5)   |
| C61  | 5358.5(14) | 7810(2)     | 2956.4(12) | 21.7(6)   |
| C3   | 2596.2(13) | -138.7(19)  | 6893.7(11) | 16.2(5)   |
| C45  | 3996.5(14) | 12489(2)    | 3574.9(14) | 24.0(6)   |
| C51  | 2582.5(13) | 8822(2)     | 1690.7(12) | 21.8(6)   |
| C23  | -144.8(13) | 3113(2)     | 6668.8(13) | 20.5(6)   |
| C12  | 2949.0(14) | -2236(2)    | 6822.2(13) | 24.5(6)   |
| C69  | 2386.5(13) | 8269(2)     | 4338.8(11) | 18.0(5)   |
| C20  | 311.8(13)  | 1319(2)     | 7346.3(13) | 20.5(6)   |
| C21  | 146.5(13)  | 2195(2)     | 7622.7(13) | 20.4(6)   |
| C46  | 3645.9(13) | 11812(2)    | 3099.6(13) | 20.0(6)   |
| C48  | 2945.0(14) | 11612(2)    | 2058.3(13) | 24.5(6)   |
| C15  | 1246.5(15) | -2390(2)    | 5848.2(12) | 23.4(6)   |
| C17  | 319.2(15)  | -1247(2)    | 5782.7(14) | 26.4(6)   |
| C44  | 4199.5(14) | 12167(2)    | 4167.5(14) | 24.0(6)   |
| C32  | 1467.4(15) | 2734(2)     | 4352.4(12) | 24.3(6)   |
| C9   | 3632.1(13) | 132(2)      | 7703.2(12) | 21.1(6)   |
| C68  | 2014.4(14) | 7420(2)     | 4389.4(12) | 21.6(6)   |
| C41  | 3804.0(14) | 10105(2)    | 5121.5(12) | 21.6(6)   |
| C31  | 936.3(15)  | 3380(2)     | 4252.9(13) | 27.5(7)   |
| C47  | 3338.5(14) | 12213(2)    | 2496.3(13) | 24.1(6)   |
| C30  | 797.4(14)  | 3782(2)     | 4757.9(12) | 22.8(6)   |
| C72  | 2068.9(14) | 9092(2)     | 3865.7(13) | 23.1(6)   |
| C34  | 1031.9(14) | 4065(2)     | 5884.3(13) | 22.5(6)   |
| C43  | 4018.3(13) | 11175(2)    | 4331.6(12) | 19.3(5)   |
| C63  | 4115.6(13) | 6160(2)     | 4231.9(13) | 24.2(6)   |
| C36  | 2391.7(14) | 1697(2)     | 5007.8(13) | 24.3(6)   |
| C14  | 1878.3(15) | -2629(2)    | 6099.0(12) | 24.1(6)   |
| C42  | 4082.6(14) | 10953(2)    | 4962.4(12) | 23.1(6)   |
| C62  | 6546.7(14) | 6047(2)     | 4941.1(13) | 24.4(6)   |
| C67  | 2265.2(14) | 6606(2)     | 4788.7(12) | 22.7(6)   |
| C25  | 535.7(15)  | 346(2)      | 7727.0(15) | 30.6(7)   |
| C66  | 2903.0(15) | 6670(2)     | 5154.3(12) | 23.7(6)   |
| C50  | 2548.4(13) | 9876(2)     | 1650.6(12) | 22.6(6)   |
| C18  | 63.4(14)   | -387(2)     | 5951.0(15) | 28.3(7)   |
| C26  | -172.6(14) | 4096(2)     | 7603.9(14) | 25.4(6)   |
| B2   | 2125.7(14) | 2508(2)     | 6122.4(13) | 16.0(6)   |
| C70  | 3983.9(15) | 7500(2)     | 5536.2(13) | 29.3(7)   |
| B3   | 4098.9(14) | 7427(2)     | 3147.3(13) | 14.5(6)   |
| C27  | -100.8(15) | 2282(2)     | 5695.8(13) | 29.3(7)   |
| C71  | 1848.1(16) | 5673(2)     | 4806.3(14) | 31.5(7)   |
| C35  | 517(2)     | 3638(3)     | 3610.1(14) | 47.1(10)  |
| B4   | 3451.8(15) | 9302(2)     | 4640.6(13) | 17.2(6)   |
| B1   | 489.3(16)  | 397(2)      | 6404.0(15) | 22.7(7)   |
| Br1A | -829.9(19) | -263(3)     | 5715.9(19) | 84.9(13)  |
| Br1  | -854.4(10) | -195.2(11)  | 5607.4(9)  | 29.8(2)   |
| Br4  | 4001(6)    | 9996(10)    | 5940(6)    | 79(4)     |
| Br4A | 3797.4(4)  | 10018.2(10) | 5954.8(5)  | 28.51(14) |

**Table S12.** Anisotropic Displacement Parameters ( $\text{\AA}^2 \times 10^3$ ) for **BN[5]-Br<sub>2</sub>**. The Anisotropic displacement factor exponent takes the form:  $-2\pi^2[h^2a^{*2}U_{11}+2hka^*b^*U_{12}+\dots]$ .

| Atom | U <sub>11</sub> | U <sub>22</sub> | U <sub>33</sub> | U <sub>23</sub> | U <sub>13</sub> | U <sub>12</sub> |
|------|-----------------|-----------------|-----------------|-----------------|-----------------|-----------------|
| Br2  | 23.07(15)       | 14.05(12)       | 25.56(14)       | -0.94(10)       | 3.87(11)        | -3.84(10)       |
| Br3  | 29.63(17)       | 16.30(13)       | 30.33(15)       | -9.00(11)       | 2.86(12)        | -2.56(11)       |
| N2   | 16.0(11)        | 14.7(10)        | 12.7(10)        | -0.9(8)         | 2.6(9)          | -0.5(9)         |
| N4   | 17.7(11)        | 12.1(10)        | 13.5(10)        | -2.1(8)         | 2.2(9)          | -2.7(9)         |
| N3   | 11.3(11)        | 14.9(10)        | 11.9(10)        | -1.7(8)         | -0.9(8)         | -2.6(8)         |
| N1   | 19.1(12)        | 13.0(10)        | 22.2(11)        | -4.3(9)         | 7.6(9)          | -2.6(9)         |
| C55  | 15.9(13)        | 8.3(11)         | 14.9(12)        | -3.5(9)         | 3.0(10)         | -1.6(9)         |
| C60  | 18.4(13)        | 11.4(11)        | 18.9(12)        | -0.7(9)         | 5.9(10)         | -0.9(10)        |
| C5   | 18.8(13)        | 11.0(11)        | 18.2(12)        | -1.3(9)         | 8.2(10)         | -2.0(10)        |
| C54  | 19.9(14)        | 11.8(11)        | 20.5(13)        | -3.2(10)        | 8.3(11)         | -2.1(10)        |
| C37  | 11.2(12)        | 19.5(12)        | 11.3(11)        | 3.7(9)          | 3.4(9)          | -0.1(10)        |
| C6   | 14.3(13)        | 21.6(13)        | 14.6(12)        | -4.0(10)        | 5.1(10)         | -3.5(10)        |
| C38  | 11.9(12)        | 18.6(12)        | 16.2(12)        | 4.6(10)         | 5.2(10)         | 2.0(10)         |
| C56  | 20.3(14)        | 10.4(11)        | 14.5(12)        | -2.2(9)         | 5.1(10)         | -1.1(10)        |





| A   | B   | C   | D   | Angle/°   | A    | B   | C   | D   | Angle/°    |
|-----|-----|-----|-----|-----------|------|-----|-----|-----|------------|
| C33 | C32 | C31 | C30 | 3.0(4)    | B3   | C55 | C56 | C57 | -179.6(2)  |
| C33 | C32 | C31 | C35 | -176.8(3) | B3   | C55 | C56 | C61 | -1.6(3)    |
| C2  | C13 | C12 | C11 | 4.1(4)    | B3   | C54 | C53 | C52 | -1.4(4)    |
| C2  | C13 | C14 | C15 | -5.5(4)   | C27  | C24 | C23 | C22 | 178.5(3)   |
| C2  | C1  | C16 | C15 | 3.7(4)    | C71  | C67 | C66 | C65 | 177.8(3)   |
| C2  | C1  | C16 | C17 | -179.3(2) | C35  | C31 | C30 | C29 | 179.6(3)   |
| C24 | C19 | C20 | C21 | -3.6(4)   | B4   | N4  | C40 | C39 | -165.6(3)  |
| C24 | C19 | C20 | C25 | 175.7(2)  | B4   | N4  | C40 | C43 | 7.0(4)     |
| C24 | C19 | B1  | N1  | 109.1(3)  | B4   | C64 | C69 | C68 | 179.7(2)   |
| C24 | C19 | B1  | C18 | -73.7(4)  | B4   | C64 | C69 | C72 | 1.3(4)     |
| C13 | C2  | C1  | N1  | 162.0(2)  | B4   | C41 | C42 | C43 | 4.7(4)     |
| C13 | C2  | C1  | C16 | -12.6(4)  | B1   | N1  | C1  | C2  | -177.1(3)  |
| C13 | C2  | C3  | C10 | -20.8(3)  | B1   | N1  | C1  | C16 | -2.2(4)    |
| C13 | C2  | C3  | C4  | 152.6(2)  | B1   | C19 | C24 | C23 | -175.1(2)  |
| C39 | C38 | C49 | C48 | 13.9(4)   | B1   | C19 | C24 | C27 | 5.3(4)     |
| C39 | C38 | C49 | C50 | -171.2(2) | B1   | C19 | C20 | C21 | 175.8(2)   |
| C39 | C40 | C43 | C44 | -0.1(4)   | B1   | C19 | C20 | C25 | -4.9(4)    |
| C39 | C40 | C43 | C42 | 171.8(2)  | Br1A | C18 | B1  | N1  | 177.7(3)   |
| C39 | C46 | C47 | C48 | 3.4(4)    | Br1A | C18 | B1  | C19 | 0.4(5)     |
| C49 | C38 | C39 | C40 | 152.0(2)  | Br1  | C18 | B1  | N1  | -173.9(2)  |
| C49 | C38 | C39 | C46 | -21.0(3)  | Br1  | C18 | B1  | C19 | 8.7(4)     |
| C49 | C48 | C47 | C46 | -11.2(4)  | Br4  | C41 | C42 | C43 | 177.0(5)   |
| C11 | C10 | C3  | C4  | -160.1(2) | Br4  | C41 | B4  | N4  | -170.4(5)  |
| C11 | C10 | C3  | C2  | 13.9(3)   | Br4  | C41 | B4  | C64 | 15.6(7)    |
| C11 | C10 | C9  | C8  | 171.6(2)  | Br4A | C41 | C42 | C43 | -169.5(2)  |
| C1  | N1  | B1  | C19 | 173.8(2)  | Br4A | C41 | B4  | N4  | 174.61(19) |
| C1  | N1  | B1  | C18 | -3.7(4)   | Br4A | C41 | B4  | C64 | 0.7(4)     |

**Table S16.** Hydrogen Atom Coordinates ( $\text{\AA}\times 10^4$ ) and Isotropic Displacement Parameters ( $\text{\AA}^2\times 10^3$ ) for **BN[5]-Br<sub>2</sub>**.

| Atom | x       | y        | z       | U(eq) |
|------|---------|----------|---------|-------|
| H6   | 3281.82 | 3162.65  | 7431.97 | 20    |
| H53  | 2872.94 | 6816.5   | 1878.3  | 22    |
| H57  | 6306.42 | 7037.45  | 3871.8  | 19    |
| H8   | 3805.33 | 1605.74  | 8005.57 | 23    |
| H59  | 5322.23 | 5728.16  | 4901.27 | 20    |
| H11  | 3727.44 | -1885.11 | 7528.46 | 27    |
| H61A | 5271.64 | 7316.86  | 2613.93 | 33    |
| H61B | 5786.98 | 8118.06  | 3031.99 | 33    |
| H61C | 5032.55 | 8364.07  | 2854.42 | 33    |
| H45  | 4091.04 | 13178.79 | 3477.42 | 29    |
| H51  | 2307.2  | 8406.35  | 1372.31 | 26    |
| H23  | -308.39 | 3720.93  | 6434.33 | 25    |
| H12  | 3096.3  | -2905.78 | 6749.54 | 29    |
| H21  | 179.09  | 2167.15  | 8044.64 | 24    |
| H48  | 2686.57 | 11921.72 | 1686.15 | 29    |
| H15  | 965.93  | -2868.67 | 5575.2  | 28    |
| H17  | 41.28   | -1742.13 | 5521.01 | 32    |

| Atom | x        | y        | z        | U(eq) |
|------|----------|----------|----------|-------|
| H44  | 4465.71  | 12611.1  | 4475.63  | 29    |
| H32  | 1578.25  | 2482.44  | 4009.96  | 29    |
| H9   | 4010.21  | -152.79  | 7987.77  | 25    |
| H68  | 1574.42  | 7395.98  | 4142.86  | 26    |
| H47  | 3414.18  | 12915.31 | 2404.7   | 29    |
| H30  | 435.18   | 4227.67  | 4696.23  | 27    |
| H72A | 2177.31  | 9787.49  | 4046.76  | 35    |
| H72B | 1600.17  | 8997.24  | 3733.27  | 35    |
| H72C | 2223.85  | 9023.62  | 3511.26  | 35    |
| H34A | 1107.73  | 3570.42  | 6225.38  | 34    |
| H34B | 579.97   | 4287.66  | 5753.14  | 34    |
| H34C | 1311.95  | 4674.36  | 6017.97  | 34    |
| H63A | 3832.52  | 6772.06  | 4154.66  | 36    |
| H63B | 4196.06  | 5921.99  | 4654.96  | 36    |
| H63C | 3908.29  | 5599.17  | 3947.67  | 36    |
| H36A | 2759.39  | 1901.9   | 5360.77  | 36    |
| H36B | 2518.19  | 1713.02  | 4635.01  | 36    |
| H36C | 2255.07  | 989.23   | 5071.42  | 36    |
| H14  | 2030.57  | -3292.35 | 6020.98  | 29    |
| H42  | 4326.29  | 11413.18 | 5273.88  | 28    |
| H62A | 6887.56  | 6020.84  | 4748.67  | 37    |
| H62B | 6503.42  | 5360.12  | 5111.74  | 37    |
| H62C | 6658.06  | 6567.31  | 5270.65  | 37    |
| H25A | 283.65   | -254.67  | 7516.98  | 46    |
| H25B | 475.31   | 435.3    | 8128.92  | 46    |
| H25C | 993.3    | 226.8    | 7781.92  | 46    |
| H66  | 3079.73  | 6121.78  | 5435.45  | 28    |
| H50  | 2278.39  | 10193.27 | 1286     | 27    |
| H26A | 155.32   | 4612.43  | 7595.65  | 38    |
| H26B | -141.2   | 3943.81  | 8030.33  | 38    |
| H26C | -601.82  | 4374.77  | 7387.23  | 38    |
| H70A | 4247.4   | 7926.74  | 5353.21  | 44    |
| H70B | 4145.41  | 6781.39  | 5584.92  | 44    |
| H70C | 4007.79  | 7785.91  | 5938.48  | 44    |
| H27A | 290.79   | 2053.2   | 5611.92  | 44    |
| H27B | -206.09  | 2996.94  | 5546.32  | 44    |
| H27C | -458.69  | 1816.9   | 5486.18  | 44    |
| H71A | 1424.47  | 5912.54  | 4812.15  | 47    |
| H71B | 2053.77  | 5261.02  | 5176     | 47    |
| H71C | 1795.61  | 5239.72  | 4442.05  | 47    |
| H35A | 788.02   | 3886.56  | 3370.76  | 71    |
| H35B | 208.4    | 4183     | 3625.25  | 71    |
| H35C | 283.27   | 3010.85  | 3416.57  | 71    |
| H1   | 1434(15) | 570(20)  | 6817(14) | 19(8) |
| H4   | 3271(14) | 9170(20) | 3752(14) | 18(8) |
| H3   | 4132(15) | 8860(20) | 3385(14) | 22(8) |
| H2   | 1881(15) | 980(20)  | 6023(14) | 22(8) |

### 3.3. 3,12-Dicyano-1,14-dihydro-2,13-dimesityl-1,14-diaza-2,13-diborapentahelicene (BN[5]-(CN)<sub>2</sub>)

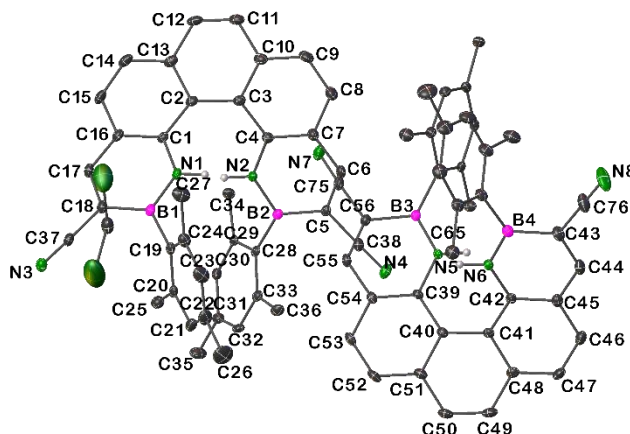

Pale-yellow single crystals of  $C_{38}H_{32}B_2N_4$  (**BN[5]-(CN)<sub>2</sub>**), two molecules of the helicene co-crystallized with one molecule of dichloromethane, net molecular formula  $C_{77}H_{66}B_4Cl_2N_8$  were grown by dissolving a small amount (ca. 2 mg) of the compound in DCM (ca. 1 mL) in a sample vial. Ethanol (ca. 5 mL) was added to a second, larger vial. The small vial was placed in the larger vial, which was capped. DCM was allowed to evaporate slowly at 25 °C, while letting the ethanol diffuse into the small vial over the course of 3 d. CCDC Deposition Number: 2212000.

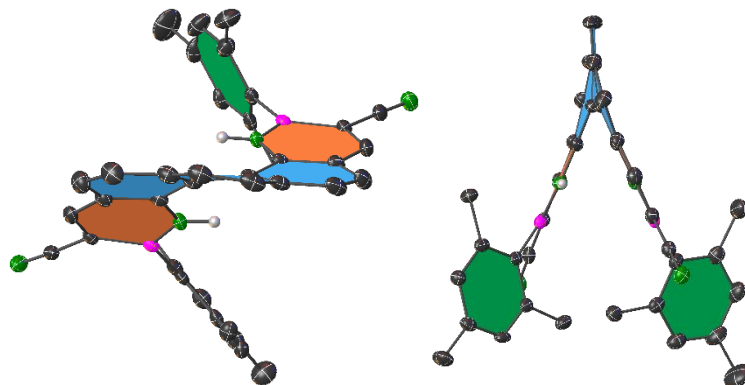

**Fig. S7.** Top view and view along the central phenyl-unit of **BN[5]-(CN)<sub>2</sub>**.

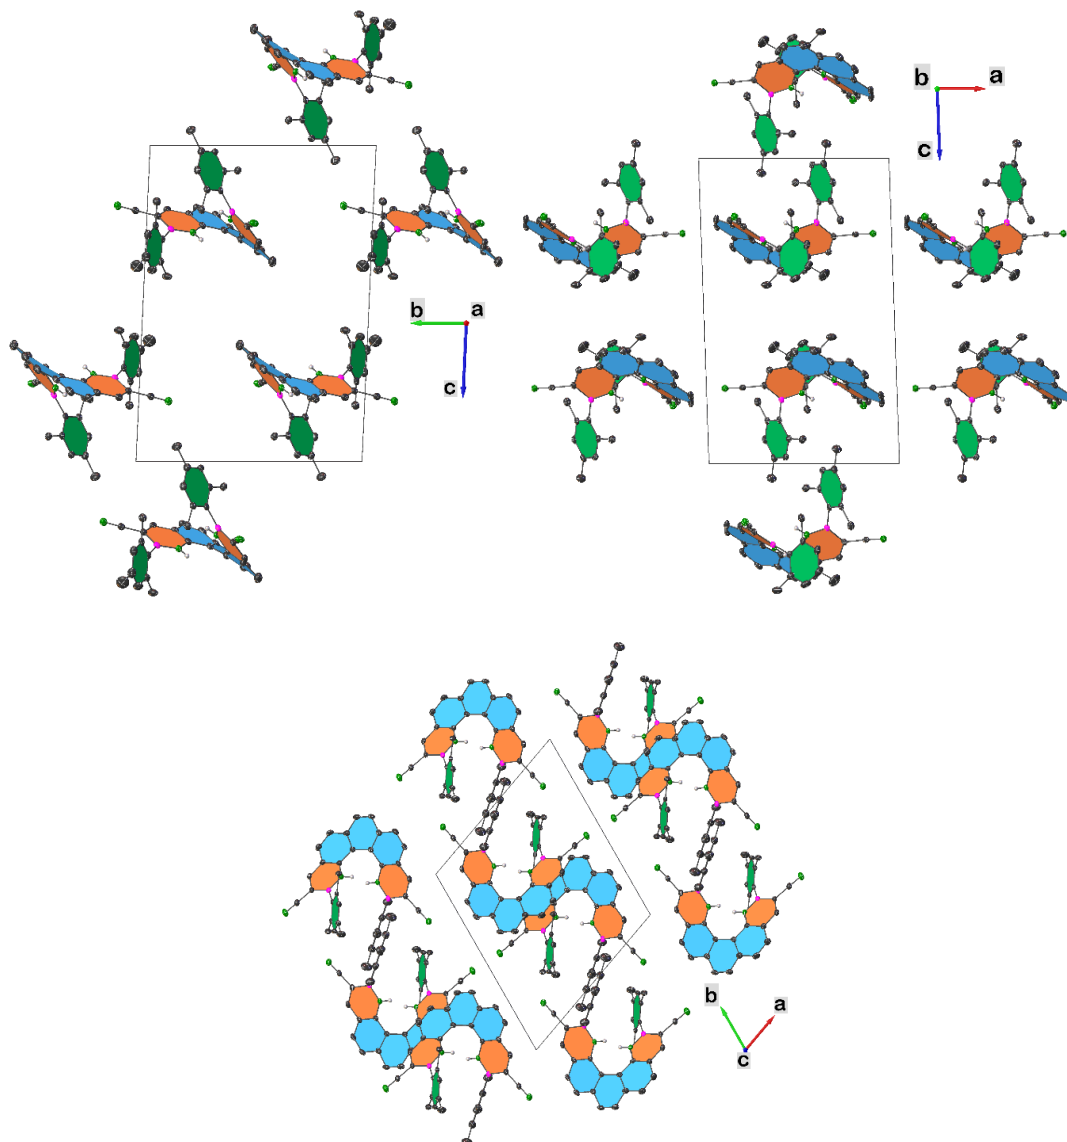

**Fig. S8.** Unit cell packing view of a **BN[5]-(CN)<sub>2</sub>** crystal along the *a*, *b* and *c*-axes



**Table S17.** Crystal data and structure refinement for **BN[5]-(CN)<sub>2</sub>**.

|                                             |                                                                   |
|---------------------------------------------|-------------------------------------------------------------------|
| Empirical formula                           | C <sub>38.5</sub> H <sub>33</sub> B <sub>2</sub> CIN <sub>4</sub> |
| Formula weight                              | 608.76                                                            |
| Temperature/K                               | 100.00                                                            |
| Crystal system                              | triclinic                                                         |
| Space group                                 | P-1                                                               |
| a/Å                                         | 13.0913(14)                                                       |
| b/Å                                         | 14.9897(16)                                                       |
| c/Å                                         | 19.698(2)                                                         |
| α°                                          | 86.550(4)                                                         |
| β°                                          | 86.961(4)                                                         |
| γ°                                          | 69.776(4)                                                         |
| Volume/Å <sup>3</sup>                       | 3618.3(7)                                                         |
| Z                                           | 4                                                                 |
| ρ <sub>calc</sub> /cm <sup>3</sup>          | 1.117                                                             |
| μ/mm <sup>-1</sup>                          | 0.136                                                             |
| F(000)                                      | 1276.0                                                            |
| Crystal size/mm <sup>3</sup>                | 0.403 × 0.129 × 0.038                                             |
| Radiation                                   | MoKα (λ = 0.71073)                                                |
| 2θ range for data collection/°              | 4.01 to 57.18                                                     |
| Index ranges                                | -17 ≤ h ≤ 17, -20 ≤ k ≤ 19, -26 ≤ l ≤ 26                          |
| Reflections collected                       | 112802                                                            |
| Independent reflections                     | 18466 [R <sub>int</sub> = 0.0673, R <sub>sigma</sub> = 0.0497]    |
| Data/restraints/parameters                  | 18466/0/848                                                       |
| Goodness-of-fit on F <sup>2</sup>           | 1.026                                                             |
| Final R indexes [I >= 2σ (I)]               | R <sub>1</sub> = 0.0610, wR <sub>2</sub> = 0.1369                 |
| Final R indexes [all data]                  | R <sub>1</sub> = 0.0950, wR <sub>2</sub> = 0.1527                 |
| Largest diff. peak/hole / e Å <sup>-3</sup> | 0.46/-0.81                                                        |

**Table S18.** Fractional Atomic Coordinates (×10<sup>4</sup>) and Equivalent Isotropic Displacement Parameters (Å<sup>2</sup>×10<sup>3</sup>) for **BN[5]-(CN)<sub>2</sub>**. U<sub>eq</sub> is defined as 1/3 of the trace of the orthogonalized U<sub>ij</sub> tensor.

| Atom | x           | y           | z          | U <sub>eq</sub> |
|------|-------------|-------------|------------|-----------------|
| C12  | 7763.3(6)   | 1946.4(6)   | 9487.0(3)  | 55.6(2)         |
| C11  | 6589.6(8)   | 709.2(5)    | 10024.0(6) | 75.2(3)         |
| N1   | 6718.3(13)  | 2063.2(11)  | 7245.1(8)  | 17.7(3)         |
| N5   | -137.1(13)  | 6630.7(11)  | 8608.1(8)  | 15.6(3)         |
| N2   | 4994.1(13)  | 3710.1(11)  | 7672.9(8)  | 17.9(3)         |
| N6   | -1070.6(13) | 6643.1(11)  | 7296.9(8)  | 17.0(3)         |
| N3   | 8222.4(14)  | -1318.5(12) | 8090.6(9)  | 25.7(4)         |
| N4   | 975.5(14)   | 4748.0(13)  | 7536.7(8)  | 26.3(4)         |
| N7   | 3566.8(15)  | 6248.3(14)  | 9249.8(10) | 32.1(4)         |
| C62  | 417.1(14)   | 8603.6(13)  | 9038.0(9)  | 16.9(4)         |
| C39  | -268.0(15)  | 5756.0(12)  | 8765.0(9)  | 15.5(4)         |
| C40  | -1260.4(15) | 5591.6(13)  | 8643.7(9)  | 16.7(4)         |
| C28  | 3768.1(14)  | 3205.6(13)  | 8570.7(10) | 17.3(4)         |
| C29  | 4235.5(15)  | 3321.7(13)  | 9179.4(10) | 18.5(4)         |
| C38  | 1894.0(16)  | 4614.4(14)  | 7511.0(9)  | 20.2(4)         |
| C54  | 592.1(16)   | 5033.0(13)  | 9088.7(9)  | 17.8(4)         |
| C57  | 929.8(15)   | 7857.2(13)  | 8599.9(9)  | 16.3(4)         |
| C33  | 3144.9(15)  | 2604.4(14)  | 8599.8(10) | 19.9(4)         |
| C5   | 3041.2(15)  | 4454.9(13)  | 7439.2(9)  | 18.2(4)         |
| C55  | 1590.2(16)  | 5170.6(13)  | 9202.9(9)  | 19.4(4)         |
| C42  | -2061.3(15) | 6789.3(13)  | 7648.6(9)  | 17.4(4)         |
| C61  | 690.1(15)   | 9431.1(13)  | 8983.1(9)  | 18.0(4)         |
| C2   | 7334.3(15)  | 3446.8(14)  | 7316.4(9)  | 19.3(4)         |
| C6   | 3337.6(16)  | 5001.2(14)  | 6938.3(10) | 21.6(4)         |
| C1   | 7440.8(15)  | 2467.3(14)  | 7470.0(9)  | 18.4(4)         |
| C58  | 1698.2(15)  | 7976.4(14)  | 8104.1(10) | 19.7(4)         |
| C53  | 461.5(17)   | 4163.4(13)  | 9324.1(9)  | 22.0(4)         |
| C60  | 1458.1(16)  | 9542.8(14)  | 8501.9(10) | 20.5(4)         |
| C56  | 1749.1(15)  | 6010.9(14)  | 9027.4(9)  | 18.6(4)         |
| C52  | -519.2(18)  | 4053.2(14)  | 9294.0(10) | 23.3(4)         |
| C41  | -2160.5(15) | 6219.8(13)  | 8246.4(9)  | 17.7(4)         |
| C59  | 1939.4(16)  | 8812.2(14)  | 8058.6(10) | 21.9(4)         |
| C20  | 5217.8(15)  | 403.6(13)   | 7458.3(10) | 21.2(4)         |

|     |             |             |             |         |
|-----|-------------|-------------|-------------|---------|
| C37 | 8005.4(15)  | -526.1(14)  | 7939.2(10)  | 21.0(4) |
| C19 | 5928.5(15)  | 725.6(13)   | 7034.9(10)  | 19.3(4) |
| C75 | 2764.8(16)  | 6126.0(14)  | 9161.1(10)  | 23.5(4) |
| C4  | 5282.7(16)  | 4254.7(13)  | 7157.2(10)  | 19.5(4) |
| C51 | -1404.5(17) | 4777.2(13)  | 8988.3(9)   | 20.6(4) |
| C16 | 8347.1(15)  | 1859.1(14)  | 7821.9(10)  | 21.7(4) |
| C65 | -396.9(16)  | 8523.4(14)  | 9589.8(10)  | 22.7(4) |
| C18 | 7760.4(16)  | 475.7(14)   | 7764.4(10)  | 20.5(4) |
| C66 | 203.9(17)   | 6912.0(15)  | 6259.9(10)  | 23.8(4) |
| C7  | 4435.6(16)  | 4942.6(14)  | 6803.5(10)  | 22.9(4) |
| C45 | -3004.5(16) | 7456.1(14)  | 7362.4(10)  | 22.3(4) |
| C30 | 4041.5(15)  | 2870.4(14)  | 9785.6(10)  | 20.2(4) |
| C3  | 6393.7(16)  | 4185.2(14)  | 7025.5(10)  | 20.5(4) |
| C36 | 2663.9(17)  | 2400.6(15)  | 7972.0(11)  | 25.5(4) |
| C13 | 8274.6(16)  | 3691.9(15)  | 7406.7(10)  | 23.4(4) |
| C34 | 4954.2(17)  | 3924.4(14)  | 9203.0(10)  | 23.8(4) |
| C50 | -2468.9(18) | 4713.8(15)  | 9069.6(10)  | 25.3(4) |
| C31 | 3428.7(16)  | 2268.1(14)  | 9814.6(10)  | 23.5(4) |
| C17 | 8475.4(16)  | 883.4(14)   | 7965.6(10)  | 23.3(4) |
| C15 | 9176.5(16)  | 2199.5(16)  | 8000.7(11)  | 27.4(5) |
| C32 | 2993.6(16)  | 2143.7(14)  | 9217.1(10)  | 22.3(4) |
| C14 | 9163.3(17)  | 3070.9(16)  | 7775.7(11)  | 28.0(5) |
| C49 | -3345.9(18) | 5432.9(15)  | 8846.3(11)  | 27.1(5) |
| C10 | 6558.4(17)  | 4969.8(15)  | 6652.0(11)  | 25.4(4) |
| C47 | -4154.7(17) | 6875.3(15)  | 8127.3(11)  | 26.6(4) |
| C63 | 2285.3(18)  | 7192.1(15)  | 7625.2(11)  | 28.2(5) |
| C48 | -3218.1(16) | 6196.6(14)  | 8416.9(10)  | 22.1(4) |
| C44 | -2926.3(17) | 8018.2(15)  | 6766.1(10)  | 26.5(4) |
| C12 | 8359.2(18)  | 4547.0(15)  | 7085.1(11)  | 28.2(5) |
| C71 | 651.0(17)   | 6088.2(15)  | 5878.6(10)  | 24.9(4) |
| C24 | 5890.0(18)  | 682.4(15)   | 6325.5(11)  | 27.2(4) |
| C46 | -4048.4(17) | 7517.9(16)  | 7636.6(11)  | 27.3(4) |
| C25 | 5249.8(17)  | 406.3(16)   | 8222.9(11)  | 26.5(4) |
| C74 | 144.3(19)   | 5319.4(16)  | 5918.2(11)  | 29.1(5) |
| C64 | 1787.9(17)  | 10413.7(15) | 8461.8(12)  | 28.3(5) |
| C43 | -1963.4(18) | 7895.8(15)  | 6421.2(10)  | 27.1(4) |
| C21 | 4468.2(17)  | 76.4(15)    | 7171.4(12)  | 27.9(5) |
| C67 | 702.6(19)   | 7610.6(16)  | 6186.3(10)  | 29.2(5) |
| C11 | 7573.8(18)  | 5113.8(16)  | 6681.2(11)  | 28.7(5) |
| N8  | -1977(2)    | 8870.8(18)  | 5295.0(11)  | 59.2(7) |
| C8  | 4678.5(18)  | 5618.4(16)  | 6347.2(11)  | 30.0(5) |
| C9  | 5699.1(19)  | 5651.9(16)  | 6296.5(12)  | 31.4(5) |
| C70 | 1557.2(19)  | 5978.9(17)  | 5444.9(10)  | 30.2(5) |
| C22 | 4416(2)     | 36.3(17)    | 6475.0(13)  | 35.2(5) |
| C23 | 5140(2)     | 334.9(18)   | 6060.1(12)  | 37.7(6) |
| C27 | 6653(2)     | 1006.8(19)  | 5853.6(11)  | 37.2(6) |
| C68 | 1610(2)     | 7477.6(18)  | 5745.2(11)  | 35.0(5) |
| C69 | 2040(2)     | 6675.2(18)  | 5367.8(11)  | 35.3(5) |
| B3  | 809.2(17)   | 6847.9(15)  | 8724.3(10)  | 16.0(4) |
| C72 | 249(2)      | 8524.0(17)  | 6564.8(12)  | 37.5(6) |
| C76 | -1972(2)    | 8447.9(17)  | 5797.7(12)  | 38.3(6) |
| B2  | 3920.7(17)  | 3765.6(15)  | 7896.6(11)  | 17.7(4) |
| B1  | 6785.6(17)  | 1093.3(15)  | 7349.3(11)  | 18.1(4) |
| C35 | 3263(2)     | 1772.9(18)  | 10478.5(12) | 35.5(5) |
| C77 | 6909(2)     | 1733.9(17)  | 10148.4(12) | 35.7(5) |
| B4  | -910.9(19)  | 7131.5(16)  | 6678.7(11)  | 22.1(5) |
| C73 | 2985(2)     | 6567(2)     | 4861.1(13)  | 48.0(7) |
| C26 | 3615(3)     | -351(2)     | 6180.5(16)  | 58.4(8) |

**Table S19.** Anisotropic Displacement Parameters (Å<sup>2</sup>×10<sup>3</sup>) for **BN[5]-(CN)<sub>2</sub>**. The Anisotropic displacement factor exponent takes the form: -2π<sup>2</sup>[h<sup>2</sup>a<sup>2</sup>U<sub>11</sub>+2hka\*b\*U<sub>12</sub>+...].

| Atom | U <sub>11</sub> | U <sub>22</sub> | U <sub>33</sub> | U <sub>23</sub> | U <sub>13</sub> | U <sub>12</sub> |
|------|-----------------|-----------------|-----------------|-----------------|-----------------|-----------------|
| C12  | 52.5(4)         | 58.7(4)         | 37.1(3)         | -1.0(3)         | 6.0(3)          | 3.0(3)          |
| C11  | 75.3(6)         | 35.5(4)         | 117.5(8)        | -1.9(4)         | -42.4(5)        | -17.3(4)        |
| N1   | 13.0(8)         | 18.0(8)         | 20.1(8)         | -2.8(6)         | -1.7(6)         | -2.3(6)         |
| N5   | 15.6(8)         | 12.4(7)         | 17.2(7)         | -0.2(6)         | -0.3(6)         | -3.1(6)         |
| N2   | 14.5(8)         | 14.9(8)         | 22.8(8)         | 0.0(6)          | -0.7(6)         | -3.4(6)         |
| N6   | 17.2(8)         | 15.4(8)         | 17.5(8)         | -0.9(6)         | -0.4(6)         | -4.5(7)         |
| N3   | 23.2(9)         | 22.4(9)         | 29.0(9)         | -2.6(7)         | -3.0(7)         | -4.0(7)         |
| N4   | 18.4(9)         | 36.1(10)        | 21.1(8)         | -4.9(7)         | -0.4(7)         | -4.5(8)         |
| N7   | 21.6(10)        | 30.1(10)        | 41.7(11)        | -2.5(8)         | -6.5(8)         | -4.4(8)         |





| A   | B   | C   | D   | Angle/°     | A   | B   | C   | D   | Angle/°     |
|-----|-----|-----|-----|-------------|-----|-----|-----|-----|-------------|
| C2  | C3  | C10 | C11 | -12.1(3)    | C67 | C66 | C71 | C74 | -178.53(19) |
| C2  | C3  | C10 | C9  | 173.05(19)  | C67 | C66 | C71 | C70 | 0.0(3)      |
| C2  | C13 | C14 | C15 | 5.6(3)      | C67 | C66 | B4  | N6  | -115.9(2)   |
| C2  | C13 | C12 | C11 | -1.8(3)     | C67 | C66 | B4  | C43 | 66.9(3)     |
| C6  | C5  | B2  | N2  | -7.1(3)     | C67 | C68 | C69 | C70 | -1.2(4)     |
| C6  | C5  | B2  | C28 | 168.47(18)  | C67 | C68 | C69 | C73 | 176.5(2)    |
| C6  | C7  | C8  | C9  | 170.0(2)    | C11 | C10 | C9  | C8  | -169.5(2)   |
| C1  | N1  | B1  | C19 | -177.32(17) | C9  | C10 | C11 | C12 | 171.4(2)    |
| C1  | N1  | B1  | C18 | 1.1(3)      | C27 | C24 | C23 | C22 | -179.4(2)   |
| C1  | C2  | C3  | C4  | 34.3(3)     | B3  | N5  | C39 | C40 | 178.86(17)  |
| C1  | C2  | C3  | C10 | -154.24(19) | B3  | N5  | C39 | C54 | 2.5(3)      |
| C1  | C2  | C13 | C14 | -14.4(3)    | B3  | C57 | C58 | C59 | -169.98(17) |
| C1  | C2  | C13 | C12 | 161.51(18)  | B3  | C57 | C58 | C63 | 8.8(3)      |
| C1  | C16 | C17 | C18 | 1.4(3)      | C72 | C67 | C68 | C69 | -177.7(2)   |
| C1  | C16 | C15 | C14 | -6.9(3)     | C76 | C43 | B4  | N6  | -178.5(2)   |
| C58 | C57 | B3  | N5  | -116.4(2)   | C76 | C43 | B4  | C66 | -0.9(3)     |
| C58 | C57 | B3  | C56 | 66.7(2)     | B2  | N2  | C4  | C7  | -0.4(3)     |
| C53 | C54 | C55 | C56 | -175.98(17) | B2  | N2  | C4  | C3  | 174.15(18)  |
| C53 | C52 | C51 | C40 | 6.6(3)      | B2  | C28 | C29 | C30 | 175.98(17)  |
| C53 | C52 | C51 | C50 | -169.18(18) | B2  | C28 | C29 | C34 | -4.2(3)     |
| C52 | C51 | C50 | C49 | 173.27(19)  | B2  | C28 | C33 | C36 | 5.1(3)      |
| C41 | C40 | C51 | C52 | 169.86(17)  | B2  | C28 | C33 | C32 | -177.62(17) |
| C41 | C40 | C51 | C50 | -14.5(3)    | B2  | C5  | C6  | C7  | 2.0(3)      |
| C41 | C42 | C45 | C44 | -179.19(18) | B1  | N1  | C1  | C2  | 177.30(18)  |
| C41 | C42 | C45 | C46 | -4.2(3)     | B1  | N1  | C1  | C16 | 1.7(3)      |
| C20 | C19 | C24 | C23 | 0.9(3)      | B1  | C19 | C24 | C23 | 178.6(2)    |
| C20 | C19 | C24 | C27 | -179.0(2)   | B1  | C19 | C24 | C27 | -1.3(3)     |
| C20 | C19 | B1  | N1  | -115.3(2)   | B1  | C18 | C17 | C16 | 1.4(3)      |
| C20 | C19 | B1  | C18 | 66.5(3)     | C35 | C31 | C32 | C33 | 179.9(2)    |
| C20 | C21 | C22 | C23 | 0.0(3)      | B4  | N6  | C42 | C41 | 175.82(18)  |
| C20 | C21 | C22 | C26 | 178.1(2)    | B4  | N6  | C42 | C45 | 2.2(3)      |
| C37 | C18 | C17 | C16 | 179.17(18)  | B4  | C66 | C71 | C74 | -7.0(3)     |
| C37 | C18 | B1  | N1  | 179.88(17)  | B4  | C66 | C71 | C70 | 171.49(19)  |
| C37 | C18 | B1  | C19 | -1.8(3)     | B4  | C66 | C67 | C68 | -171.6(2)   |
| C19 | C20 | C21 | C22 | 1.6(3)      | B4  | C66 | C67 | C72 | 6.6(3)      |
| C19 | C24 | C23 | C22 | 0.7(4)      | C26 | C22 | C23 | C24 | -179.2(3)   |

**Table S23.** Hydrogen Atom Coordinates ( $\text{\AA}\times 10^4$ ) and Isotropic Displacement Parameters ( $\text{\AA}^2\times 10^3$ ) for **BN[5]-(CN)<sub>2</sub>**.

| Atom | x        | y       | z        | U(eq) |
|------|----------|---------|----------|-------|
| H55  | 2163.19  | 4663.99 | 9406.98  | 23    |
| H61  | 341.26   | 9928.99 | 9282.65  | 22    |
| H6   | 2785.7   | 5437.87 | 6669.62  | 26    |
| H53  | 1062.79  | 3658.12 | 9502.95  | 26    |
| H52  | -614.49  | 3486.09 | 9479.32  | 28    |
| H59  | 2446.16  | 8886.6  | 7716.03  | 26    |
| H65A | -710.61  | 8049.08 | 9471.39  | 34    |
| H65B | -978.14  | 9141.77 | 9633.01  | 34    |
| H65C | -30.23   | 8327.24 | 10022.87 | 34    |
| H30  | 4334.73  | 2975.08 | 10192.1  | 24    |
| H36A | 1868.17  | 2684.55 | 8006.1   | 38    |
| H36B | 2874.35  | 1710.95 | 7934.1   | 38    |
| H36C | 2937.16  | 2674.1  | 7568.23  | 38    |
| H34A | 5706.37  | 3543.5  | 9076.26  | 36    |
| H34B | 4926.02  | 4143.67 | 9664.72  | 36    |
| H34C | 4694.46  | 4475.57 | 8883.39  | 36    |
| H50  | -2558.78 | 4159.06 | 9283.14  | 30    |

| Atom | x        | y        | z        | U(eq) |
|------|----------|----------|----------|-------|
| H17  | 9087.81  | 497.34   | 8213.35  | 28    |
| H15  | 9745.29  | 1811.44  | 8280.74  | 33    |
| H32  | 2579.27  | 1732.87  | 9225.86  | 27    |
| H14  | 9755.34  | 3270.29  | 7865.44  | 34    |
| H49  | -4056.13 | 5433.99  | 8974.71  | 33    |
| H47  | -4859.15 | 6881.56  | 8276.47  | 32    |
| H63A | 2540.84  | 7465.74  | 7214.64  | 42    |
| H63B | 1785.23  | 6875.91  | 7499.45  | 42    |
| H63C | 2909.79  | 6727.07  | 7851.67  | 42    |
| H44  | -3567.66 | 8494.01  | 6604.08  | 32    |
| H12  | 8978.56  | 4717.09  | 7157.71  | 34    |
| H46  | -4677.33 | 8011.14  | 7476.67  | 33    |
| H25A | 5892.22  | -114.59  | 8382.61  | 40    |
| H25B | 4590.24  | 320.74   | 8429.25  | 40    |
| H25C | 5287.79  | 1014.49  | 8353.24  | 40    |
| H74A | 487.31   | 4858.84  | 5569.43  | 44    |
| H74B | -637.86  | 5606.72  | 5841.72  | 44    |
| H74C | 255.1    | 4994.45  | 6369.29  | 44    |
| H64A | 2569.97  | 10224.7  | 8536.36  | 42    |
| H64B | 1379.78  | 10849.15 | 8811.65  | 42    |
| H64C | 1628.54  | 10733.77 | 8011.24  | 42    |
| H21  | 3979.71  | -124.45  | 7462.82  | 33    |
| H11  | 7699.24  | 5616.1   | 6412.39  | 34    |
| H8   | 4122.98  | 6047.64  | 6076.98  | 36    |
| H9   | 5840.94  | 6139.4   | 6018.86  | 38    |
| H70  | 1852.44  | 5417.26  | 5196.35  | 36    |
| H23  | 5124.36  | 301.3    | 5580.9   | 45    |
| H27A | 6673.91  | 757.42   | 5402.47  | 56    |
| H27B | 7386.04  | 769.55   | 6035.33  | 56    |
| H27C | 6394.57  | 1703.77  | 5816.79  | 56    |
| H68  | 1941.47  | 7951.96  | 5703.59  | 42    |
| H72A | 825.57   | 8792.18  | 6609.66  | 56    |
| H72B | -23.83   | 8388.73  | 7018.13  | 56    |
| H72C | -348.26  | 8981.71  | 6311.4   | 56    |
| H35A | 3943.75  | 1551.69  | 10724.67 | 53    |
| H35B | 3050.09  | 1227.15  | 10387.56 | 53    |
| H35C | 2689.24  | 2218.02  | 10754.99 | 53    |
| H77A | 6227.27  | 2290.41  | 10174.32 | 43    |
| H77B | 7273.92  | 1656.93  | 10586.48 | 43    |
| H73A | 3465.96  | 5899.49  | 4866.32  | 72    |
| H73B | 3394.42  | 6966.35  | 4985.87  | 72    |
| H73C | 2705.4   | 6763.57  | 4403.93  | 72    |
| H26A | 3980.49  | -1025.37 | 6090.26  | 88    |
| H26B | 3343.76  | 4.66     | 5754.83  | 88    |
| H26C | 3003.22  | -282.83  | 6506.22  | 88    |
| H5   | -699(18) | 7078(16) | 8437(11) | 17(5) |
| H1   | 6167(19) | 2461(16) | 6986(11) | 22(6) |
| H6A  | -490(20) | 6178(18) | 7465(12) | 27(6) |
| H2   | 5540(20) | 3347(17) | 7924(12) | 26(6) |

### 3.4. 1,16-Dihydro-2,15-dimesityl-1,16-diaza-2,15-diborahexahelicene (BN[6])

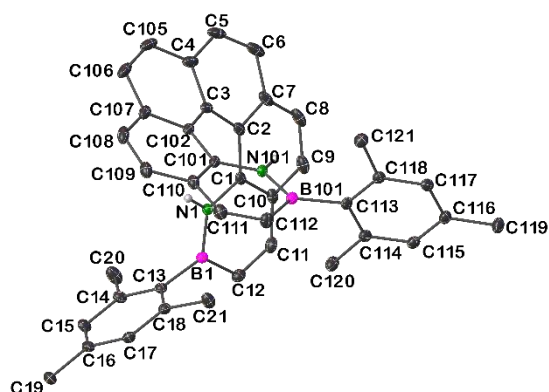

Colorless single crystals of  $C_{40}H_{36}B_2N_2$  (**BN[6]**) were grown by dissolving a small amount (ca. 10 mg) of the compound in DCM (ca. 0.5 mL) in a snap cap sample vial. The vial was placed in a larger, capped vial, filled with cyclohexane (ca. 5 mL). Over 7 d, DCM slowly evaporated while cyclohexane was allowed to diffuse into the DCM solution. CCDC Deposition Number: 2192803.

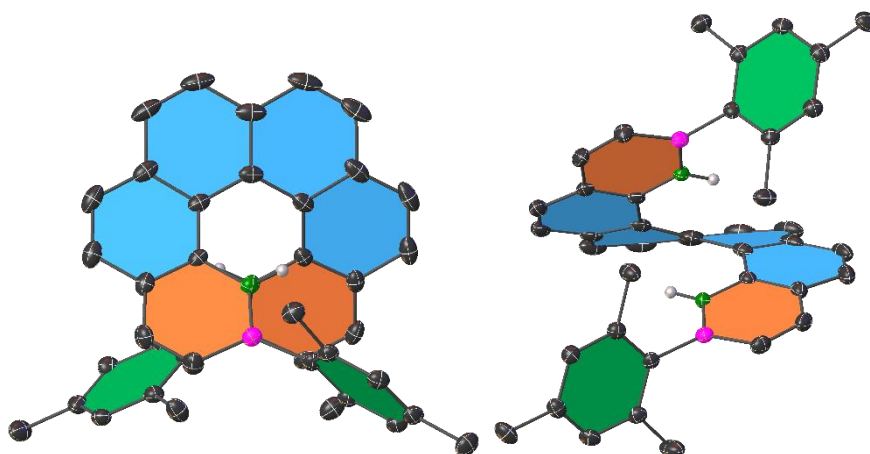

Fig. S9. Frontal view and representation of the helical structure of **BN[6]**.

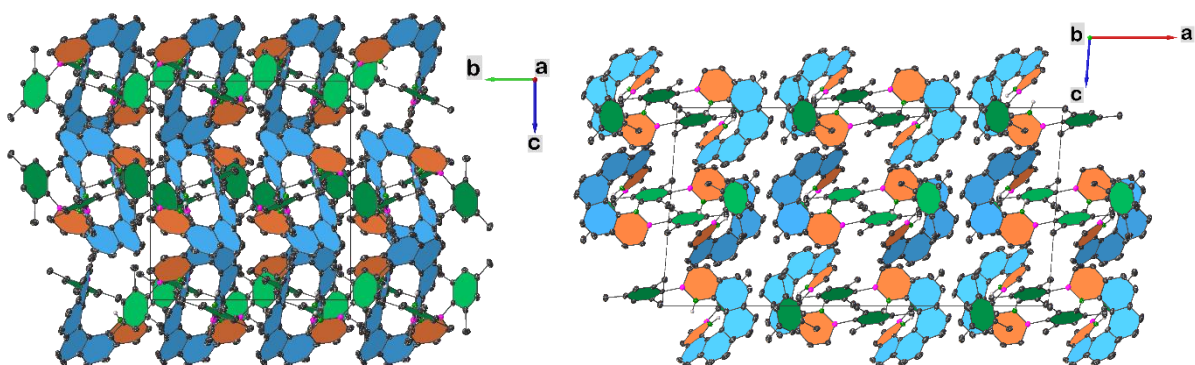

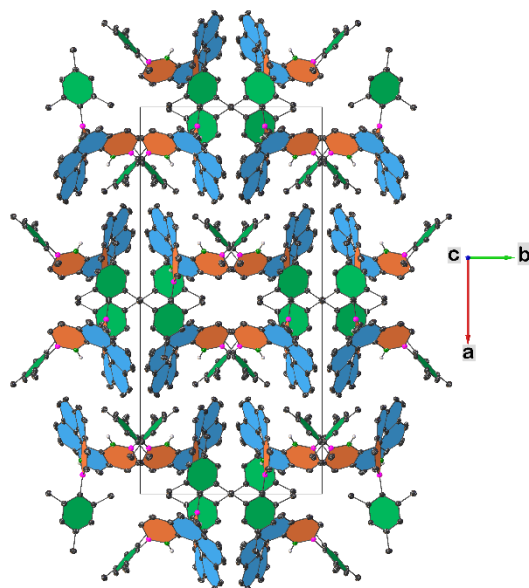

**Fig. S10.** Unit cell packing view of a **BN[6]** crystal along the a, b and c-axes.

**Table S24.** Crystal data and structure refinement for **BN[6]**.

|                                                |                                                               |
|------------------------------------------------|---------------------------------------------------------------|
| Empirical formula                              | C <sub>40</sub> H <sub>36</sub> B <sub>2</sub> N <sub>2</sub> |
| Formula weight                                 | 566.33                                                        |
| Temperature/K                                  | 100.00                                                        |
| Crystal system                                 | monoclinic                                                    |
| Space group                                    | C2/c                                                          |
| a/Å                                            | 29.2871(11)                                                   |
| b/Å                                            | 13.7319(5)                                                    |
| c/Å                                            | 15.0245(5)                                                    |
| $\alpha^\circ$                                 | 90                                                            |
| $\beta^\circ$                                  | 94.365(2)                                                     |
| $\gamma^\circ$                                 | 90                                                            |
| Volume/Å <sup>3</sup>                          | 6024.8(4)                                                     |
| Z                                              | 8                                                             |
| $\rho_{\text{calc}}/\text{cm}^{-3}$            | 1.249                                                         |
| $\mu/\text{mm}^{-1}$                           | 0.071                                                         |
| F(000)                                         | 2400.0                                                        |
| Crystal size/mm <sup>3</sup>                   | 0.24 × 0.23 × 0.18                                            |
| Radiation                                      | MoK $\alpha$ ( $\lambda = 0.71073$ )                          |
| 2 $\theta$ range for data collection/ $^\circ$ | 4.19 to 56.564                                                |
| Index ranges                                   | -38 ≤ h ≤ 38, -18 ≤ k ≤ 16,<br>-20 ≤ l ≤ 20                   |
| Reflections collected                          | 76344                                                         |
| Independent reflections                        | 7480 [R <sub>int</sub> = 0.0575, R <sub>sigma</sub> = 0.0327] |
| Data/restraints/parameters                     | 7480/0/403                                                    |
| Goodness-of-fit on F <sup>2</sup>              | 1.031                                                         |
| Final R indexes [ $ \rho  > 2\sigma( \rho )$ ] | R <sub>1</sub> = 0.0528, wR <sub>2</sub> = 0.1348             |
| Final R indexes [all data]                     | R <sub>1</sub> = 0.0721, wR <sub>2</sub> = 0.1471             |
| Largest diff. peak/hole / e Å <sup>-3</sup>    | 0.64/-0.32                                                    |

**Table S25.** Fractional Atomic Coordinates ( $\times 10^4$ ) and Equivalent Isotropic Displacement Parameters ( $\text{Å}^2 \times 10^3$ ) for **BN[6]**.  $U_{\text{eq}}$  is defined as 1/3 of the trace of the orthogonalized  $U_{ij}$  tensor.

| Atom | x         | y          | z          | $U_{\text{eq}}$ |
|------|-----------|------------|------------|-----------------|
| N1   | 3723.8(4) | 6489.5(9)  | 4068.6(8)  | 16.9(2)         |
| C1   | 3924.2(5) | 7093.9(11) | 3468.7(9)  | 18.8(3)         |
| B1   | 3820.0(6) | 5481.5(12) | 4199.8(11) | 18.5(3)         |
| C2   | 3761.5(5) | 8067.4(11) | 3295.4(10) | 21.3(3)         |
| C3   | 3410.7(5) | 8533.3(10) | 3774.4(10) | 21.9(3)         |
| C4   | 3113.6(6) | 9186.5(11) | 3279.3(12) | 29.7(4)         |
| C5   | 3253.1(7) | 9594.7(13) | 2471.1(13) | 37.1(4)         |
| C6   | 3651.6(7) | 9339.8(13) | 2139.6(12) | 37.0(4)         |
| C7   | 3902.2(6) | 8521.6(12) | 2504.2(11) | 29.0(4)         |
| C8   | 4248.6(6) | 8115.6(14) | 2032.8(11) | 33.6(4)         |
| C9   | 4429.0(6) | 7236.3(14) | 2259.7(11) | 31.6(4)         |

|      |           |             |            |         |
|------|-----------|-------------|------------|---------|
| C10  | 4259.0(5) | 6683.5(12)  | 2961.9(10) | 23.0(3) |
| C11  | 4393.9(5) | 5688.6(13)  | 3093.8(11) | 26.1(3) |
| C12  | 4196.0(5) | 5081.0(12)  | 3658.4(10) | 24.3(3) |
| C13  | 3543.0(5) | 4860.4(10)  | 4857.9(10) | 18.9(3) |
| C14  | 3184.8(5) | 4246.9(11)  | 4526.9(10) | 23.5(3) |
| C15  | 2955.0(6) | 3672.0(11)  | 5116.2(11) | 25.9(3) |
| C16  | 3073.4(5) | 3672.3(11)  | 6026.8(11) | 23.4(3) |
| C17  | 3428.1(5) | 4282.0(11)  | 6344.0(10) | 20.9(3) |
| C18  | 3660.3(5) | 4870.2(11)  | 5781.2(10) | 20.6(3) |
| C19  | 2827.4(6) | 3038.4(12)  | 6666.1(13) | 30.9(4) |
| C20  | 3046.1(7) | 4215.5(14)  | 3536.9(11) | 36.0(4) |
| C21  | 4046.8(6) | 5506.6(13)  | 6162.1(11) | 28.9(4) |
| N101 | 4142.6(4) | 8224.1(9)   | 5256.3(8)  | 18.0(2) |
| C101 | 3680.3(5) | 8179.1(10)  | 5404.4(10) | 18.5(3) |
| B101 | 4512.6(6) | 8145.0(12)  | 5929.1(11) | 20.2(3) |
| C102 | 3327.8(5) | 8385.2(10)  | 4704.6(10) | 20.6(3) |
| C105 | 2685.9(6) | 9431.1(12)  | 3596.5(13) | 35.5(4) |
| C106 | 2557.3(6) | 9077.4(13)  | 4377.7(13) | 33.6(4) |
| C107 | 2881.8(5) | 8583.7(11)  | 4976.8(12) | 26.3(3) |
| C108 | 2769.7(6) | 8358.6(13)  | 5848.9(12) | 30.6(4) |
| C109 | 3097.4(6) | 8048.7(12)  | 6473.0(12) | 27.9(4) |
| C110 | 3565.6(5) | 8011.0(11)  | 6283.9(10) | 23.0(3) |
| C111 | 3915.9(6) | 7875.9(12)  | 6990.5(10) | 26.1(3) |
| C112 | 4366.2(5) | 7936.0(13)  | 6863.9(10) | 26.1(3) |
| C113 | 5028.1(5) | 8292.8(11)  | 5713.1(9)  | 19.1(3) |
| C114 | 5285.6(5) | 7546.1(11)  | 5348.6(10) | 21.1(3) |
| C115 | 5748.9(5) | 7675.8(12)  | 5252.7(10) | 22.9(3) |
| C116 | 5973.9(5) | 8535.9(12)  | 5499.6(10) | 23.4(3) |
| C117 | 5720.0(5) | 9278.4(11)  | 5854.0(10) | 22.8(3) |
| C118 | 5254.1(5) | 9171.6(11)  | 5959.8(9)  | 20.8(3) |
| C119 | 6482.5(5) | 8662.5(13)  | 5402.0(12) | 30.8(4) |
| C120 | 5056.7(6) | 6596.3(12)  | 5067.3(12) | 29.2(4) |
| C121 | 4990.0(6) | 10014.3(12) | 6309.4(11) | 26.6(3) |

**Table S26.** Anisotropic Displacement Parameters ( $\text{Å}^2 \times 10^3$ ) for **BN[6]**. The Anisotropic displacement factor exponent takes the form:  $-2\pi^2[h^2a^2U_{11}+2hka^*b^*U_{12}+\dots]$ .

| Atom | $U_{11}$ | $U_{22}$ | $U_{33}$ | $U_{23}$ | $U_{13}$ | $U_{12}$ |
|------|----------|----------|----------|----------|----------|----------|
| N1   | 16.5(6)  | 17.4(6)  | 16.9(6)  | -1.0(4)  | 2.5(4)   | -0.6(4)  |
| C1   | 17.8(7)  | 21.5(7)  | 16.7(6)  | -0.7(5)  | -2.3(5)  | -4.9(5)  |
| B1   | 19.2(7)  | 18.2(8)  | 17.6(7)  | -1.0(6)  | -1.5(6)  | 0.0(6)   |
| C2   | 21.8(7)  | 21.2(7)  | 19.7(7)  | 1.5(6)   | -5.5(5)  | -8.2(6)  |
| C3   | 20.6(7)  | 14.2(7)  | 29.3(8)  | 0.5(6)   | -8.6(6)  | -4.3(5)  |
| C4   | 32.6(9)  | 16.2(7)  | 37.6(9)  | -0.5(6)  | -16.2(7) | -1.4(6)  |
| C5   | 47.7(11) | 18.9(8)  | 40.8(10) | 8.4(7)   | -21.9(8) | -5.3(7)  |
| C6   | 53.8(12) | 26.1(9)  | 28.5(9)  | 10.0(7)  | -12.9(8) | -15.8(8) |



| A   | B    | C    | D    | Angle/°     | A    | B    | C    | D    | Angle/°     | Atom | x       | y        | z       | U(eq) |
|-----|------|------|------|-------------|------|------|------|------|-------------|------|---------|----------|---------|-------|
| C4  | C3   | C102 | C101 | -148.16(14) | C105 | C106 | C107 | C108 | 169.52(16)  | H11  | 4634.6  | 5443.24  | 2768.05 | 31    |
| C4  | C3   | C102 | C107 | 22.8(2)     | C106 | C107 | C108 | C109 | -168.34(15) | H12  | 4289.46 | 4420.02  | 3715.62 | 29    |
| C4  | C5   | C6   | C7   | 11.6(3)     | C107 | C108 | C109 | C110 | 4.6(2)      | H15  | 2710.25 | 3268.85  | 4885.81 | 31    |
| C4  | C105 | C106 | C107 | 10.9(3)     | C108 | C109 | C110 | C101 | -8.1(2)     | H17  | 3513.82 | 4295.75  | 6966.57 | 25    |
| C5  | C4   | C105 | C106 | -177.51(16) | C108 | C109 | C110 | C111 | 167.29(15)  | H19A | 2924.8  | 2360.11  | 6608.25 | 46    |
| C5  | C6   | C7   | C2   | -8.7(2)     | C109 | C110 | C111 | C112 | -172.89(16) | H19B | 2496    | 3085.43  | 6523.06 | 46    |
| C5  | C6   | C7   | C8   | 164.52(16)  | C110 | C101 | C102 | C3   | -177.69(14) | H19C | 2902.43 | 3260.6   | 7279.68 | 46    |
| C6  | C7   | C8   | C9   | -166.61(16) | C110 | C101 | C102 | C107 | 11.2(2)     | H20A | 2984.49 | 4878.21  | 3317.42 | 54    |
| C7  | C2   | C3   | C4   | 22.8(2)     | C110 | C111 | C112 | B101 | -0.7(3)     | H20B | 2769.47 | 3818.02  | 3430.39 | 54    |
| C7  | C2   | C3   | C102 | -158.40(14) | C112 | B101 | C113 | C114 | 99.97(18)   | H20C | 3294.61 | 3930     | 3221.45 | 54    |
| C7  | C8   | C9   | C10  | 2.5(3)      | C112 | B101 | C113 | C118 | -74.5(2)    | H21A | 3995.18 | 5678.17  | 6779.59 | 43    |
| C8  | C9   | C10  | C1   | -5.0(2)     | C113 | B101 | C112 | C111 | 176.25(15)  | H21B | 4059.25 | 6101.53  | 5804.56 | 43    |
| C8  | C9   | C10  | C11  | 168.89(15)  | C113 | C114 | C115 | C116 | -0.6(2)     | H21C | 4337.04 | 5153.59  | 6149.74 | 43    |
| C9  | C10  | C11  | C12  | -169.95(15) | C114 | C113 | C118 | C117 | -1.0(2)     | H101 | 4213.15 | 8308.3   | 4702.61 | 22    |
| C10 | C1   | C2   | C3   | 178.60(14)  | C114 | C113 | C118 | C121 | 176.86(13)  | H105 | 2484.87 | 9852.87  | 3252.73 | 43    |
| C10 | C1   | C2   | C7   | 9.6(2)      | C114 | C115 | C116 | C117 | 0.1(2)      | H106 | 2250.55 | 9156.94  | 4529.55 | 40    |
| C10 | C11  | C12  | B1   | -1.7(2)     | C114 | C115 | C116 | C119 | 179.18(15)  | H108 | 2462.3  | 8424.16  | 6001.56 | 37    |
| C12 | B1   | C13  | C14  | -78.4(2)    | C115 | C116 | C117 | C118 | -0.1(2)     | H109 | 3012.62 | 7854.11  | 7044.39 | 33    |
| C12 | B1   | C13  | C18  | 98.68(18)   | C116 | C117 | C118 | C113 | 0.5(2)      | H111 | 3827.68 | 7738.24  | 7572.9  | 31    |
| C13 | B1   | C12  | C11  | 177.57(14)  | C116 | C117 | C118 | C121 | -177.32(14) | H112 | 4589.32 | 7849.44  | 7350.25 | 31    |
| C7  | C8   | C9   | C10  | 2.5(3)      | C112 | B101 | C113 | C118 | -74.5(2)    | H115 | 5917.37 | 7161.09  | 5010.83 | 27    |
| C13 | C14  | C15  | C16  | -1.1(2)     | C118 | C113 | C114 | C115 | 1.0(2)      | H117 | 5867.73 | 9871.89  | 6027.85 | 27    |
| C14 | C13  | C18  | C17  | 0.4(2)      | C118 | C113 | C114 | C120 | -179.44(14) | H11A | 6655.46 | 8461.41  | 5955.57 | 46    |
| C14 | C13  | C18  | C21  | 179.12(14)  | C119 | C116 | C117 | C118 | -179.15(15) | H11B | 6547.36 | 9347.98  | 5280.89 | 46    |
| C14 | C15  | C16  | C17  | 1.0(2)      | C120 | C114 | C115 | C116 | 179.85(15)  | H11C | 6573.19 | 8259.89  | 4906.51 | 46    |
|     |      |      |      |             |      |      |      |      |             | H12D | 4955.73 | 6261.7   | 5593.97 | 44    |
|     |      |      |      |             |      |      |      |      |             | H12E | 5274.71 | 6183.19  | 4778.15 | 44    |
|     |      |      |      |             |      |      |      |      |             | H12F | 4791.32 | 6728.42  | 4647.37 | 44    |
|     |      |      |      |             |      |      |      |      |             | H12A | 4807.25 | 10323.89 | 5814.1  | 40    |
|     |      |      |      |             |      |      |      |      |             | H12B | 5204.49 | 10490.43 | 6590.85 | 40    |
|     |      |      |      |             |      |      |      |      |             | H12C | 4786.76 | 9776.06  | 6750.35 | 40    |

**Table S30.** Hydrogen Atom Coordinates ( $\text{\AA}\times 10^4$ ) and Isotropic Displacement Parameters ( $\text{\AA}^2\times 10^3$ ) for **BN[6]**.

| Atom | x       | y        | z       | U(eq) |
|------|---------|----------|---------|-------|
| H1   | 3519.71 | 6752.15  | 4396.06 | 20    |
| H5   | 3060.83 | 10057.69 | 2157.88 | 45    |
| H6   | 3765.07 | 9703.22  | 1665.66 | 44    |
| H8   | 4358.94 | 8462.58  | 1545.93 | 40    |
| H9   | 4672.54 | 6984.58  | 1945.47 | 38    |

### 3.5. 2,13-Dimesitylpentahelicene (**CC[5]**)

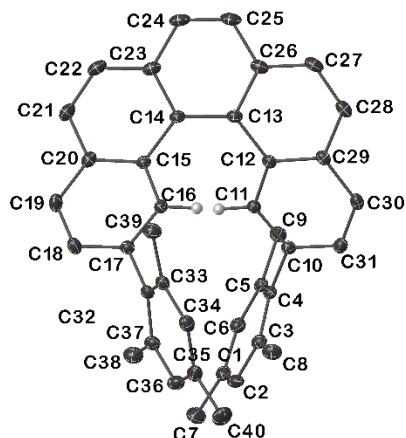

Colorless single crystals of  $C_{40}H_{34}$  (**CC[5]**) were grown by dissolving a small amount (ca. 5 mg) of the compound in DCM (ca. 1 mL) in a sample vial. *n*-Hexane (ca. 5 mL) was added to a second, larger vial. The small vial was placed in the larger vial, which was capped. DCM was allowed to evaporate slowly at 25 °C, while letting the *n*-hexane diffuse into the small vial over the course of 1 d. CCDC Deposition Number: 2192799.



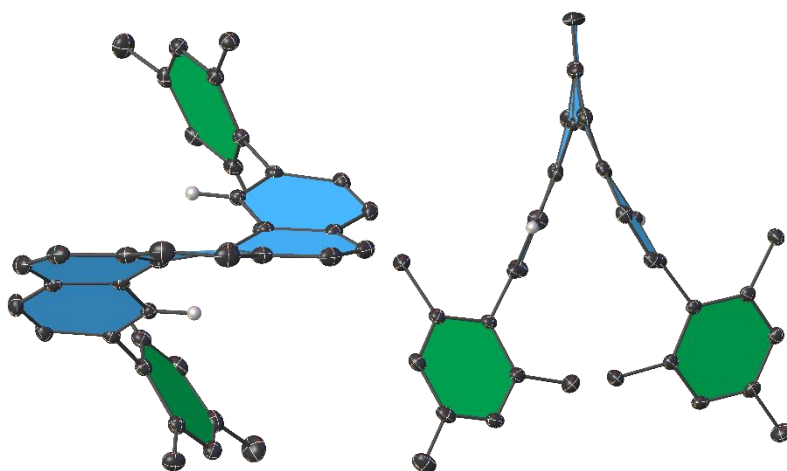

Fig. S11. Top view and view along the central phenyl-unit of CC[5].

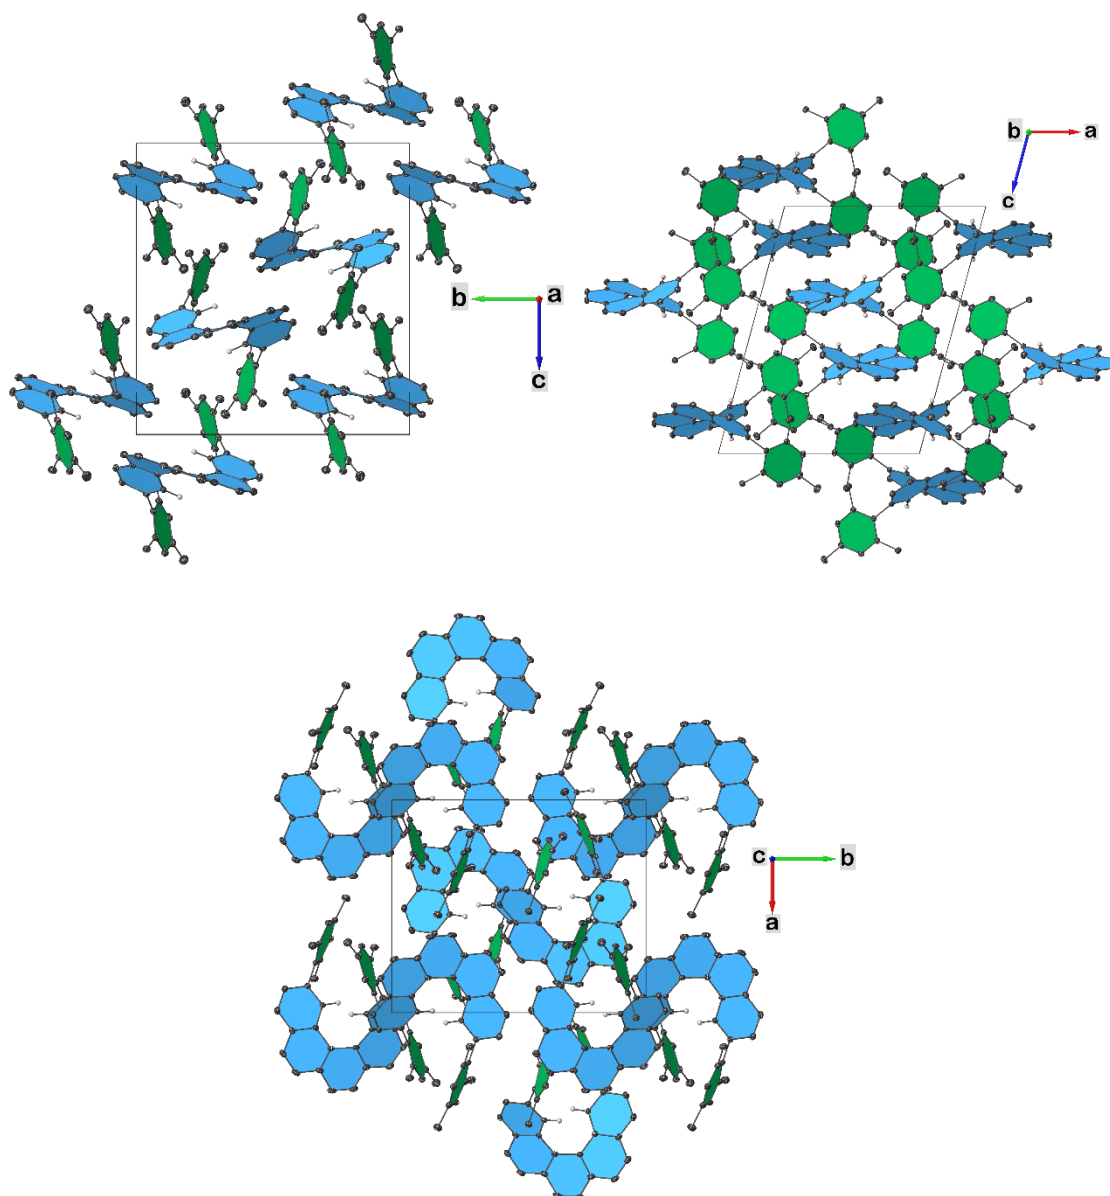

Fig. S12. Unit cell packing view of a CC[5] crystal along the a, b and c-axes.

**Table S31.** Crystal data and structure refinement for **CC[5]**.

|                                             |                                                               |
|---------------------------------------------|---------------------------------------------------------------|
| Empirical formula                           | C <sub>40</sub> H <sub>34</sub>                               |
| Formula weight                              | 514.67                                                        |
| Temperature/K                               | 100.00                                                        |
| Crystal system                              | monoclinic                                                    |
| Space group                                 | P2 <sub>1</sub> /n                                            |
| a/Å                                         | 12.554(5)                                                     |
| b/Å                                         | 14.479(4)                                                     |
| c/Å                                         | 15.943(6)                                                     |
| α°                                          | 90                                                            |
| β°                                          | 105.032(14)                                                   |
| γ°                                          | 90                                                            |
| Volume/Å <sup>3</sup>                       | 2798.8(16)                                                    |
| Z                                           | 4                                                             |
| ρ <sub>calc</sub> /cm <sup>3</sup>          | 1.221                                                         |
| μ/mm <sup>-1</sup>                          | 0.069                                                         |
| F(000)                                      | 1096.0                                                        |
| Crystal size/mm <sup>3</sup>                | 0.453 × 0.375 × 0.174                                         |
| Radiation                                   | MoKα (λ = 0.71073)                                            |
| 2θ range for data collection/°              | 4.784 to 61.21                                                |
| Index ranges                                | -17 ≤ h ≤ 17, -20 ≤ k ≤ 20, -21 ≤ l ≤ 22                      |
| Reflections collected                       | 55723                                                         |
| Independent reflections                     | 8551 [R <sub>int</sub> = 0.0505, R <sub>sigma</sub> = 0.0356] |
| Data/restraints/parameters                  | 8551/0/368                                                    |
| Goodness-of-fit on F <sup>2</sup>           | 1.032                                                         |
| Final R indexes [I >= 2σ (I)]               | R <sub>1</sub> = 0.0498, wR <sub>2</sub> = 0.1253             |
| Final R indexes [all data]                  | R <sub>1</sub> = 0.0694, wR <sub>2</sub> = 0.1399             |
| Largest diff. peak/hole / e Å <sup>-3</sup> | 0.44/-0.40                                                    |

**Table S32.** Fractional Atomic Coordinates (×10<sup>4</sup>) and Equivalent Isotropic Displacement Parameters (Å<sup>2</sup>×10<sup>3</sup>) for **CC[5]**. U<sub>eq</sub> is defined as 1/3 of the trace of the orthogonalized U<sub>ij</sub> tensor.

| Atom | x          | y          | z         | U <sub>eq</sub> |
|------|------------|------------|-----------|-----------------|
| C6   | 6563.3(10) | 3946.3(9)  | 938.6(8)  | 16.9(2)         |
| C5   | 5929.6(10) | 4294.8(8)  | 1466.4(8) | 15.0(2)         |
| C26  | 2429.0(10) | 3990.3(9)  | 3939.0(8) | 16.9(2)         |
| C12  | 4218.6(9)  | 4216.3(8)  | 3624.5(7) | 12.8(2)         |
| C13  | 3357.0(9)  | 3584.2(8)  | 3730.3(7) | 13.5(2)         |
| C10  | 5710.3(9)  | 4634.2(8)  | 2959.1(7) | 13.6(2)         |
| C11  | 4950.9(9)  | 4003.9(8)  | 3109.4(7) | 12.6(2)         |
| C1   | 7656.1(10) | 3674.0(9)  | 1275.6(8) | 17.5(2)         |
| C16  | 5365.5(9)  | 2271.5(8)  | 4181.6(7) | 12.8(2)         |
| C30  | 5085.8(10) | 5743.8(8)  | 3854.5(8) | 16.5(2)         |
| C35  | 9346.0(10) | 2750.5(9)  | 5895.8(9) | 19.8(3)         |
| C33  | 7485.6(10) | 2175.5(8)  | 5774.8(8) | 15.5(2)         |
| C29  | 4250.0(10) | 5130.9(8)  | 3955.6(7) | 14.5(2)         |
| C17  | 6261.3(10) | 1678.6(8)  | 4339.0(8) | 14.1(2)         |
| C15  | 4299.5(9)  | 2000.7(8)  | 3696.1(7) | 12.7(2)         |
| C23  | 2288.0(10) | 2151.0(9)  | 3357.6(8) | 16.7(2)         |
| C4   | 6407.9(10) | 4372.3(8)  | 2365.1(8) | 13.8(2)         |
| C37  | 8249.9(10) | 2123.9(9)  | 4522.9(8) | 16.7(2)         |
| C25  | 1423.0(10) | 3486.8(10) | 3800.2(9) | 21.5(3)         |
| C20  | 4161.2(10) | 1067.2(9)  | 3406.6(8) | 16.1(2)         |
| C36  | 9227.1(10) | 2501.1(9)  | 5034.2(9) | 19.5(3)         |
| C32  | 7355.6(10) | 1990.5(8)  | 4888.9(8) | 14.2(2)         |
| C14  | 3330.1(9)  | 2594.8(8)  | 3575.0(7) | 13.1(2)         |
| C24  | 1336.5(10) | 2622.9(10) | 3459.6(9) | 21.3(3)         |
| C18  | 6120.9(11) | 780.2(9)   | 3986.5(9) | 19.1(2)         |
| C22  | 2182.4(10) | 1216.7(10) | 3054.7(8) | 19.7(3)         |
| C2   | 8132.1(10) | 3809.6(9)  | 2155.6(8) | 17.5(2)         |
| C31  | 5799.4(10) | 5509.0(8)  | 3366.0(8) | 16.5(2)         |
| C3   | 7527.7(10) | 4162.3(9)  | 2706.9(8) | 16.0(2)         |
| C21  | 3080.3(11) | 706.9(9)   | 3037.6(8) | 19.3(2)         |
| C19  | 5092.4(11) | 484.7(9)   | 3536.3(9) | 20.0(3)         |
| C28  | 3383.3(11) | 5448.4(9)  | 4313.6(8) | 18.0(2)         |
| C9   | 4761.7(10) | 4617.7(9)  | 1072.2(8) | 18.3(2)         |
| C34  | 8471.1(10) | 2569.7(9)  | 6257.0(8) | 18.0(2)         |
| C27  | 2480.6(10) | 4918.4(10) | 4253.5(8) | 19.1(3)         |

|     |             |            |            |         |
|-----|-------------|------------|------------|---------|
| C39 | 6602.2(11)  | 1937.7(10) | 6222.3(9)  | 20.4(3) |
| C8  | 8073.3(11)  | 4306.9(10) | 3657.0(8)  | 20.7(3) |
| C7  | 8304.9(12)  | 3257.1(10) | 694.1(10)  | 24.8(3) |
| C38 | 8160.4(11)  | 1877.6(10) | 3589.2(9)  | 22.6(3) |
| C40 | 10393.6(12) | 3191.9(11) | 6427.4(10) | 28.2(3) |

**Table S33.** Anisotropic Displacement Parameters (Å<sup>2</sup>×10<sup>3</sup>) for **CC[5]**. The Anisotropic displacement factor exponent takes the form: -2π<sup>2</sup>[h<sup>2</sup>a<sup>2</sup>\*U<sub>11</sub>+2hka\*b\*U<sub>12</sub>+...].

| Atom | U <sub>11</sub> | U <sub>22</sub> | U <sub>33</sub> | U <sub>23</sub> | U <sub>13</sub> | U <sub>12</sub> |
|------|-----------------|-----------------|-----------------|-----------------|-----------------|-----------------|
| C6   | 17.4(6)         | 17.2(5)         | 16.6(5)         | -0.5(4)         | 5.4(4)          | -2.0(4)         |
| C5   | 15.1(5)         | 13.4(5)         | 16.9(5)         | 1.3(4)          | 4.6(4)          | -1.6(4)         |
| C26  | 13.9(5)         | 23.0(6)         | 14.2(5)         | 2.9(4)          | 4.4(4)          | 4.1(5)          |
| C12  | 11.9(5)         | 14.1(5)         | 11.4(5)         | 1.8(4)          | 1.3(4)          | 2.3(4)          |
| C13  | 10.7(5)         | 18.4(5)         | 10.9(5)         | 1.8(4)          | 2.0(4)          | 1.0(4)          |
| C10  | 12.3(5)         | 15.1(5)         | 12.8(5)         | 1.9(4)          | 2.3(4)          | 1.0(4)          |
| C11  | 11.8(5)         | 13.2(5)         | 12.7(5)         | 0.7(4)          | 3.2(4)          | 1.0(4)          |
| C1   | 18.3(6)         | 15.5(5)         | 21.2(6)         | -0.2(5)         | 9.5(5)          | -2.2(4)         |
| C16  | 13.0(5)         | 12.7(5)         | 12.7(5)         | 0.4(4)          | 3.3(4)          | -0.6(4)         |
| C30  | 17.9(6)         | 12.9(5)         | 17.1(5)         | -1.1(4)         | 1.9(4)          | 2.3(4)          |
| C35  | 14.9(6)         | 16.5(6)         | 25.1(6)         | 1.5(5)          | -0.1(5)         | 1.4(4)          |
| C33  | 14.5(5)         | 14.1(5)         | 17.3(5)         | 1.2(4)          | 3.1(4)          | 3.0(4)          |
| C29  | 14.8(5)         | 15.6(5)         | 12.2(5)         | 0.7(4)          | 1.8(4)          | 3.8(4)          |
| C17  | 12.9(5)         | 14.9(5)         | 14.5(5)         | 1.4(4)          | 3.4(4)          | 0.5(4)          |
| C15  | 12.2(5)         | 14.5(5)         | 11.5(5)         | 1.5(4)          | 3.4(4)          | -1.1(4)         |
| C23  | 12.6(5)         | 23.6(6)         | 13.4(5)         | 2.9(4)          | 2.4(4)          | -2.7(4)         |
| C4   | 13.2(5)         | 12.5(5)         | 16.4(5)         | 1.4(4)          | 5.0(4)          | -1.0(4)         |
| C37  | 14.5(5)         | 17.3(5)         | 18.2(5)         | 3.3(4)          | 4.0(4)          | 2.5(4)          |
| C25  | 12.6(5)         | 31.2(7)         | 22.6(6)         | 3.2(5)          | 7.9(5)          | 3.1(5)          |
| C20  | 17.1(5)         | 16.0(5)         | 15.0(5)         | 0.1(4)          | 3.5(4)          | -3.6(4)         |
| C36  | 13.7(5)         | 20.8(6)         | 23.9(6)         | 5.0(5)          | 4.4(5)          | 0.6(5)          |
| C32  | 11.8(5)         | 13.1(5)         | 16.8(5)         | 1.7(4)          | 2.4(4)          | 2.5(4)          |
| C14  | 10.6(5)         | 18.0(5)         | 10.8(5)         | 1.7(4)          | 2.8(4)          | -0.7(4)         |
| C24  | 10.8(5)         | 31.4(7)         | 22.3(6)         | 3.4(5)          | 5.2(5)          | -2.3(5)         |
| C18  | 17.9(6)         | 15.0(6)         | 23.6(6)         | -0.7(5)         | 3.7(5)          | 3.1(4)          |
| C22  | 15.8(6)         | 24.9(6)         | 16.9(5)         | 1.7(5)          | 1.8(4)          | -8.4(5)         |
| C2   | 12.5(5)         | 19.3(6)         | 21.6(6)         | 3.8(5)          | 5.9(4)          | 0.6(4)          |
| C31  | 15.3(5)         | 14.5(5)         | 18.7(5)         | 0.9(4)          | 2.4(4)          | -0.8(4)         |
| C3   | 14.8(5)         | 16.6(5)         | 16.6(5)         | 3.0(4)          | 4.2(4)          | -1.3(4)         |
| C21  | 20.2(6)         | 18.0(6)         | 18.0(6)         | -0.7(5)         | 2.0(5)          | -6.7(5)         |
| C19  | 22.3(6)         | 13.3(5)         | 23.6(6)         | -3.8(5)         | 4.3(5)          | -1.0(5)         |
| C28  | 19.7(6)         | 18.9(6)         | 15.2(5)         | -0.6(4)         | 4.2(4)          | 6.9(5)          |
| C9   | 16.2(5)         | 20.3(6)         | 17.2(5)         | 0.3(5)          | 2.5(4)          | 1.5(5)          |
| C34  | 17.5(6)         | 17.4(6)         | 17.2(5)         | -0.3(4)         | 1.2(4)          | 2.8(5)          |
| C27  | 16.4(6)         | 25.2(6)         | 16.9(5)         | 1.3(5)          | 6.6(4)          | 7.5(5)          |
| C39  | 18.2(6)         | 25.5(6)         | 18.4(6)         | 2.2(5)          | 6.4(5)          | 2.1(5)          |
| C8   | 15.8(6)         | 27.6(7)         | 17.4(6)         | 2.1(5)          | 2.0(4)          | 2.1(5)          |
| C7   | 23.6(7)         | 26.9(7)         | 27.4(7)         | -4.1(6)         | 13.1(5)         | 2.0(5)          |
| C38  | 21.2(6)         | 28.0(7)         | 20.3(6)         | 1.5(5)          | 8.3(5)          | 0.6(5)          |
| C40  | 19.4(6)         | 28.0(7)         | 33.0(8)         | -2.6(6)         | -0.9(6)         | -5.2(5)         |

**Table S34.** Bond Lengths for **CC[5]**.

| Atom | Atom | Length/Å   | Atom | Atom | Length/Å   |
|------|------|------------|------|------|------------|
| C6   | C5   | 1.3938(17) | C33  | C32  | 1.4049(18) |
| C6   | C1   | 1.3943(18) | C33  | C34  | 1.3979(18) |
| C5   | C4   | 1.4071(17) | C33  | C39  | 1.5059(18) |
| C5   | C9   | 1.5118(18) | C29  | C28  | 1.4293(17) |
| C26  | C13  | 1.4194(17) | C17  | C32  | 1.4952(17) |
| C26  | C25  | 1.4250(19) | C17  | C18  | 1.4098(17) |
| C26  | C27  | 1.4300(19) | C15  | C20  | 1.4243(17) |
| C12  | C13  | 1.4598(17) | C15  | C14  | 1.4617(16) |
| C12  | C11  | 1.4163(16) | C23  | C14  | 1.4176(17) |
| C12  | C29  | 1.4223(17) | C23  | C24  | 1.4217(18) |
| C13  | C14  | 1.4526(17) | C23  | C22  | 1.4309(19) |
| C10  | C11  | 1.3847(16) | C4   | C3   | 1.4031(17) |
| C10  | C4   | 1.4959(17) | C37  | C36  | 1.3961(18) |
| C10  | C31  | 1.4142(17) | C37  | C32  | 1.4065(17) |
| C1   | C2   | 1.3890(19) | C37  | C38  | 1.5063(19) |
| C1   | C7   | 1.5095(18) | C25  | C24  | 1.357(2)   |
| C16  | C17  | 1.3850(16) | C20  | C21  | 1.4302(18) |
| C16  | C15  | 1.4166(16) | C20  | C19  | 1.4126(18) |



### 3.6. 2,15-Dimesitylhexahelicene (CC[6])

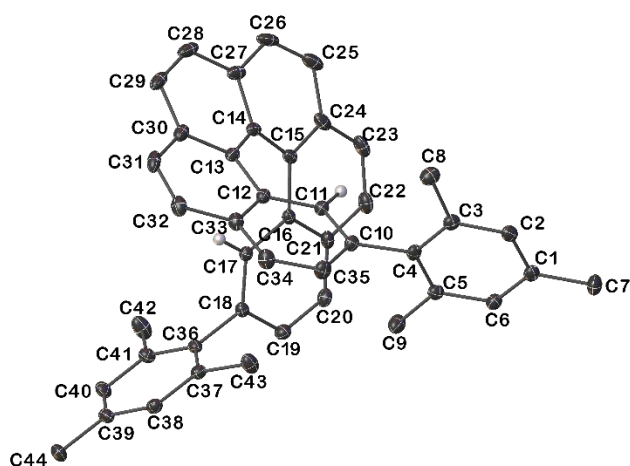

Colorless single crystals of  $C_{44}H_{36}$  (**CC[6]**) were grown by dissolving a small amount (ca. 1 mg) of the compound in DCM (ca. 1 mL) in a sample vial. Cyclohexane (ca. 5 mL) was added to a second, larger vial. The small vial was placed in the larger vial, which was capped. DCM was allowed to evaporate slowly at 25 °C, while letting the cyclohexane diffuse into the small vial over the course of 14 d. CCDC Deposition Number: 2192801.

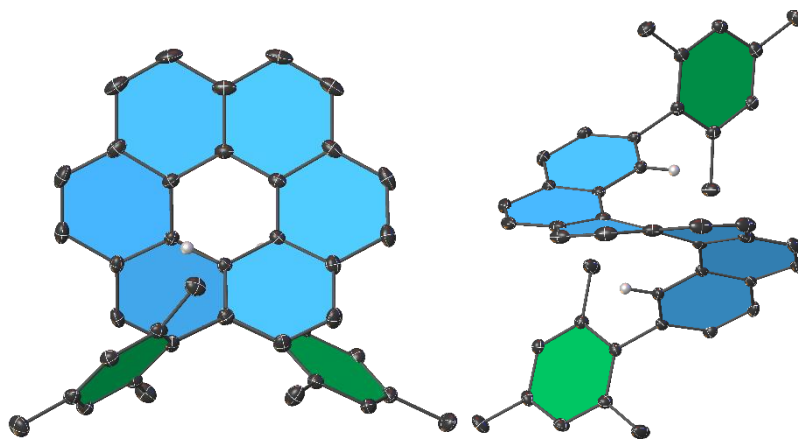

Fig. S13. Frontal view and representation of the helical structure of **CC[6]**.

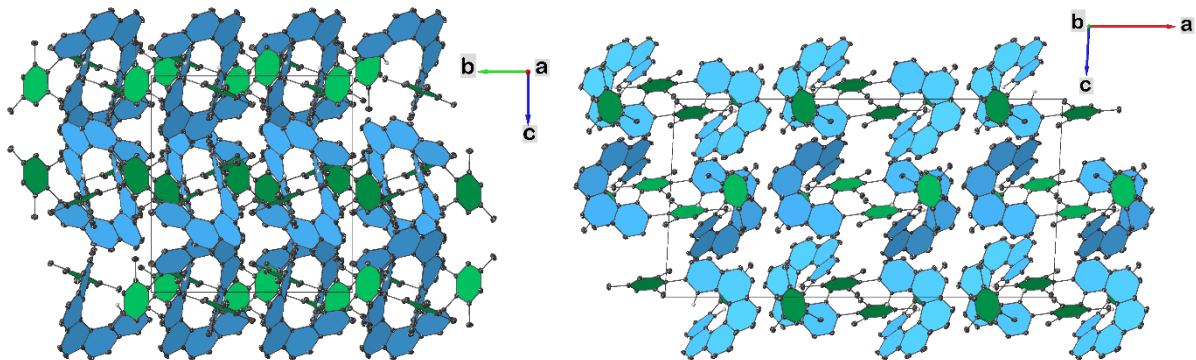

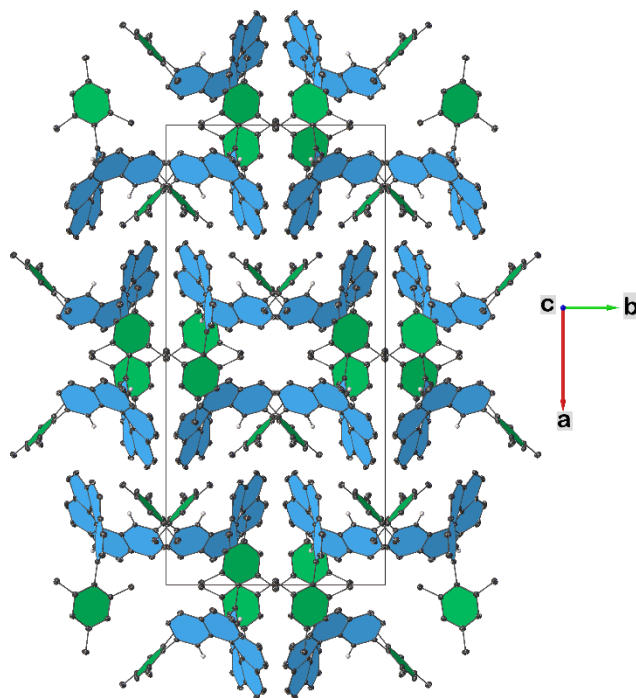

Fig. S14. Unit cell packing view of a CC[6] crystal along the a, b and c-axes.

Table S38. Crystal data and structure refinement for CC[6].

|                                             |                                                               |
|---------------------------------------------|---------------------------------------------------------------|
| Empirical formula                           | C <sub>44</sub> H <sub>36</sub>                               |
| Formula weight                              | 564.73                                                        |
| Temperature/K                               | 100.00                                                        |
| Crystal system                              | monoclinic                                                    |
| Space group                                 | C2/c                                                          |
| a/Å                                         | 29.1349(9)                                                    |
| b/Å                                         | 13.8389(5)                                                    |
| c/Å                                         | 14.8881(6)                                                    |
| $\alpha$ /°                                 | 90                                                            |
| $\beta$ /°                                  | 92.9530(10)                                                   |
| $\gamma$ /°                                 | 90                                                            |
| Volume/Å <sup>3</sup>                       | 5994.8(4)                                                     |
| Z                                           | 8                                                             |
| $\rho_{\text{calc}}/\text{cm}^3$            | 1.251                                                         |
| $\mu/\text{mm}^{-1}$                        | 0.071                                                         |
| F(000)                                      | 2400.0                                                        |
| Crystal size/mm <sup>3</sup>                | 0.333 × 0.295 × 0.166                                         |
| Radiation                                   | MoK $\alpha$ ( $\lambda = 0.71073$ )                          |
| 2 $\theta$ range for data collection/°      | 5.128 to 61.118                                               |
| Index ranges                                | -37 ≤ h ≤ 41, -19 ≤ k ≤ 19,<br>-19 ≤ l ≤ 21                   |
| Reflections collected                       | 55111                                                         |
| Independent reflections                     | 9154 [R <sub>int</sub> = 0.0535, R <sub>sigma</sub> = 0.0400] |
| Data/restraints/parameters                  | 9154/0/403                                                    |
| Goodness-of-fit on F <sup>2</sup>           | 1.017                                                         |
| Final R indexes [ $ I  \geq 2\sigma(I)$ ]   | R1 = 0.0534, wR2 = 0.1227                                     |
| Final R indexes [all data]                  | R1 = 0.0745, wR2 = 0.1345                                     |
| Largest diff. peak/hole / e Å <sup>-3</sup> | 0.40/-0.27                                                    |

Table S39. Fractional Atomic Coordinates ( $\times 10^4$ ) and Equivalent Isotropic Displacement Parameters ( $\text{\AA}^2 \times 10^3$ ) for CC[6].  $U_{\text{eq}}$  is defined as 1/3 of the trace of the orthogonalized  $U_{ij}$  tensor.

| Atom | x         | y         | z         | U(eq)   |
|------|-----------|-----------|-----------|---------|
| C17  | 6311.4(4) | 3570.3(9) | 5932.7(8) | 11.9(2) |
| C12  | 6313.4(4) | 1808.5(9) | 4625.0(8) | 12.7(2) |
| C16  | 6091.7(4) | 2960.6(9) | 6545.0(8) | 12.1(2) |
| C38  | 6570.4(4) | 5736.5(9) | 3690.1(8) | 15.0(2) |
| C18  | 6189.8(4) | 4528.6(9) | 5808.5(8) | 12.5(2) |
| C21  | 5743.4(4) | 3379.5(9) | 7053.3(8) | 14.6(2) |

|     |           |            |            |         |
|-----|-----------|------------|------------|---------|
| C10 | 5503.8(4) | 1849.8(9)  | 4086.2(8)  | 13.7(2) |
| C6  | 4266.1(4) | 2306.7(9)  | 4649.6(8)  | 16.2(2) |
| C14 | 6591.6(4) | 1478.5(9)  | 6264.1(8)  | 13.8(2) |
| C36 | 6442.6(4) | 5159.9(9)  | 5186.4(8)  | 12.7(2) |
| C4  | 5003.1(4) | 1706.1(9)  | 4228.6(8)  | 13.9(2) |
| C11 | 5837.7(4) | 1741.6(9)  | 4776.4(8)  | 12.8(2) |
| C37 | 6332.9(4) | 5140.4(9)  | 4258.0(8)  | 14.3(2) |
| C5  | 4737.0(4) | 2448.2(9)  | 4577.5(8)  | 15.0(2) |
| C2  | 4321.7(4) | 708.6(9)   | 4052.7(8)  | 16.6(2) |
| C19 | 5825.5(4) | 4911.8(9)  | 6284.8(9)  | 15.9(2) |
| C13 | 6672.0(4) | 1591.9(9)  | 5317.2(8)  | 13.5(2) |
| C35 | 5640.6(4) | 2063.8(10) | 3209.8(8)  | 18.0(3) |
| C30 | 7115.6(4) | 1374.9(9)  | 5028.3(9)  | 17.0(2) |
| C1  | 4051.4(4) | 1444.7(10) | 4387.3(8)  | 16.7(2) |
| C40 | 7024.3(4) | 6360.3(9)  | 4938.0(9)  | 17.3(2) |
| C33 | 6441.2(4) | 1987.4(9)  | 3730.3(8)  | 15.6(2) |
| C41 | 6792.1(4) | 5778.3(9)  | 5532.7(8)  | 15.8(2) |
| C3  | 4793.9(4) | 820.7(9)   | 3976.8(8)  | 15.2(2) |
| C20 | 5608.1(4) | 4344.3(10) | 6885.8(9)  | 16.7(2) |
| C39 | 6917.4(4) | 6355.5(9)  | 4015.5(9)  | 15.9(2) |
| C24 | 6105.7(5) | 1564.0(10) | 7564.1(8)  | 18.0(3) |
| C15 | 6248.9(4) | 1982.6(9)  | 6756.2(8)  | 13.2(2) |
| C22 | 5560.8(5) | 2851.5(11) | 7781.2(9)  | 19.6(3) |
| C34 | 6097.2(5) | 2131.9(10) | 3040.3(9)  | 18.6(3) |
| C32 | 6915.0(4) | 1952.8(10) | 3519.4(9)  | 18.8(3) |
| C31 | 7235.7(4) | 1618.3(10) | 4138.9(10) | 19.7(3) |
| C8  | 5078.0(5) | -17.0(10)  | 3671.9(9)  | 20.6(3) |
| C28 | 7308.5(5) | 544.9(10)  | 6421.3(10) | 23.1(3) |
| C27 | 6883.6(5) | 828.0(9)   | 6764.2(9)  | 18.9(3) |
| C23 | 5746.7(5) | 1994.8(11) | 8039.7(9)  | 21.1(3) |
| C25 | 6347.4(5) | 751.2(10)  | 7951.6(9)  | 23.1(3) |
| C29 | 7437.5(5) | 877.1(10)  | 5616.2(10) | 21.7(3) |
| C7  | 3539.9(5) | 1308.0(11) | 4463.2(10) | 23.6(3) |
| C44 | 7172.1(5) | 6990.0(10) | 3378.7(10) | 22.2(3) |
| C43 | 5957.3(5) | 4492.4(11) | 3870.1(9)  | 20.9(3) |
| C9  | 4953.2(5) | 3394.3(10) | 4874.0(10) | 20.8(3) |
| C26 | 6744.4(5) | 457.0(10)  | 7602.7(10) | 23.6(3) |
| C42 | 6921.8(5) | 5801.6(11) | 6527.7(9)  | 25.3(3) |



| A   | B   | C   | D   | Angle/°     | A   | B   | C   | D   | Angle/°     | Atom | x       | y       | z       | U(eq) |
|-----|-----|-----|-----|-------------|-----|-----|-----|-----|-------------|------|---------|---------|---------|-------|
| C21 | C16 | C15 | C14 | 178.12(11)  | C3  | C2  | C1  | C6  | -0.11(19)   | H26  | 6932.73 | -2.47   | 7920.4  | 28    |
| C21 | C16 | C15 | C24 | -11.23(16)  | C3  | C2  | C1  | C7  | 179.95(12)  | H42A | 6667.19 | 6073.01 | 6851.48 | 38    |
| C21 | C22 | C23 | C24 | -4.2(2)     | C20 | C21 | C22 | C23 | -168.51(12) | H42B | 7196.03 | 6203.49 | 6635.46 | 38    |
| C10 | C4  | C5  | C6  | 176.15(11)  | C39 | C38 | C37 | C36 | 0.17(19)    | H42C | 6986.19 | 5143.4  | 6741.86 | 38    |
| C10 | C4  | C5  | C9  | -3.80(18)   | C39 | C38 | C37 | C43 | 179.38(12)  |      |         |         |         |       |
| C10 | C4  | C3  | C2  | -175.74(11) | C39 | C40 | C41 | C36 | 0.73(19)    |      |         |         |         |       |
| C10 | C4  | C3  | C8  | 7.31(17)    | C39 | C40 | C41 | C42 | 179.58(13)  |      |         |         |         |       |
| C10 | C35 | C34 | C33 | 0.3(2)      | C24 | C25 | C26 | C27 | -11.2(2)    |      |         |         |         |       |
| C14 | C13 | C30 | C31 | -169.96(11) | C15 | C16 | C21 | C20 | 176.46(11)  |      |         |         |         |       |
| C14 | C13 | C30 | C29 | 12.51(17)   | C15 | C16 | C21 | C22 | 1.84(17)    |      |         |         |         |       |
| C14 | C27 | C26 | C25 | -3.2(2)     | C15 | C14 | C13 | C12 | -32.73(19)  |      |         |         |         |       |
| C36 | C18 | C19 | C20 | -177.00(11) | C15 | C14 | C13 | C30 | 154.56(12)  |      |         |         |         |       |
| C4  | C10 | C11 | C12 | 175.29(11)  | C15 | C14 | C27 | C28 | -160.21(12) |      |         |         |         |       |
| C4  | C10 | C35 | C34 | -175.33(12) | C15 | C14 | C27 | C26 | 20.47(17)   |      |         |         |         |       |
| C11 | C12 | C13 | C14 | -12.96(19)  | C15 | C24 | C23 | C22 | -5.75(19)   |      |         |         |         |       |
| C11 | C12 | C13 | C30 | 159.78(12)  | C15 | C24 | C25 | C26 | 7.77(19)    |      |         |         |         |       |
| C11 | C12 | C33 | C34 | 2.69(18)    | C22 | C21 | C20 | C19 | 170.17(12)  |      |         |         |         |       |
| C11 | C12 | C33 | C32 | -172.89(12) | C34 | C33 | C32 | C31 | -166.35(13) |      |         |         |         |       |
| C11 | C10 | C4  | C5  | 82.90(16)   | C32 | C33 | C34 | C35 | 172.88(13)  |      |         |         |         |       |
| C11 | C10 | C4  | C3  | -99.39(14)  | C31 | C30 | C29 | C28 | -172.34(13) |      |         |         |         |       |
| C11 | C10 | C35 | C34 | 2.1(2)      | C28 | C27 | C26 | C25 | 177.50(13)  |      |         |         |         |       |
| C37 | C38 | C39 | C40 | 0.32(19)    | C27 | C14 | C13 | C12 | 148.87(12)  |      |         |         |         |       |
| C37 | C38 | C39 | C44 | 179.52(12)  | C27 | C14 | C13 | C30 | -23.84(16)  |      |         |         |         |       |
| C37 | C36 | C41 | C40 | -0.22(18)   | C27 | C14 | C15 | C16 | 147.08(11)  |      |         |         |         |       |
| C37 | C36 | C41 | C42 | -179.06(12) | C27 | C14 | C15 | C24 | -23.49(16)  |      |         |         |         |       |
| C5  | C6  | C1  | C2  | 0.58(19)    | C27 | C28 | C29 | C30 | -11.2(2)    |      |         |         |         |       |
| C5  | C6  | C1  | C7  | -179.48(12) | C23 | C24 | C15 | C16 | 13.26(17)   |      |         |         |         |       |
| C5  | C4  | C3  | C2  | 2.01(18)    | C23 | C24 | C15 | C14 | -175.56(11) |      |         |         |         |       |
| C5  | C4  | C3  | C8  | -174.94(12) | C23 | C24 | C25 | C26 | -166.87(13) |      |         |         |         |       |
| C19 | C18 | C36 | C37 | -98.56(14)  | C25 | C24 | C15 | C16 | -161.30(11) |      |         |         |         |       |
| C19 | C18 | C36 | C41 | 81.35(15)   | C25 | C24 | C15 | C14 | 9.88(17)    |      |         |         |         |       |
| C13 | C12 | C11 | C10 | -172.99(12) | C25 | C24 | C23 | C22 | 168.87(13)  |      |         |         |         |       |
| C13 | C12 | C33 | C34 | 175.64(12)  | C29 | C30 | C31 | C32 | 169.53(13)  |      |         |         |         |       |
| C13 | C12 | C33 | C32 | 0.06(18)    | C29 | C28 | C27 | C14 | -0.9(2)     |      |         |         |         |       |
| C13 | C14 | C15 | C16 | -31.33(18)  | C29 | C28 | C27 | C26 | 178.46(13)  |      |         |         |         |       |
| C17 | C16 | C21 | C20 | 4.63(17)    | C13 | C14 | C15 | C24 | 158.10(12)  |      |         |         |         |       |

**Table S44.** Hydrogen Atom Coordinates ( $\text{\AA}\times 10^4$ ) and Isotropic Displacement Parameters ( $\text{\AA}^2\times 10^3$ ) for **CC[6]**.

| Atom | x       | y       | z       | U(eq) |
|------|---------|---------|---------|-------|
| H17  | 6550.72 | 3310.84 | 5595.86 | 14    |
| H38  | 6493.75 | 5721.02 | 3062.24 | 18    |
| H6   | 4086.89 | 2812.18 | 4883.96 | 19    |
| H11  | 5745.26 | 1618.91 | 5368.35 | 15    |
| H2   | 4180.55 | 116.02  | 3871.96 | 20    |
| H19  | 5731.06 | 5562.36 | 6189.17 | 19    |
| H35  | 5414.29 | 2160.74 | 2735.89 | 22    |
| H40  | 7262.74 | 6772.35 | 5170.35 | 21    |
| H20  | 5360.25 | 4606.81 | 7197.12 | 20    |
| H22  | 5307.87 | 3104.56 | 8083.55 | 23    |
| H34  | 6183.74 | 2278.79 | 2449.11 | 22    |
| H32  | 7005.14 | 2163.34 | 2947.29 | 23    |
| H31  | 7544.92 | 1545.45 | 3976.91 | 24    |
| H8A  | 5270.59 | 196.15  | 3189.02 | 31    |
| H8B  | 4873.93 | -536.86 | 3449.47 | 31    |
| H8C  | 5274.04 | -254.73 | 4179.18 | 31    |
| H28  | 7504.9  | 117.35  | 6760.11 | 28    |
| H23  | 5635.76 | 1673.53 | 8549.04 | 25    |
| H25  | 6230.08 | 420.63  | 8449.91 | 28    |
| H29  | 7743.21 | 778.22  | 5442.66 | 26    |
| H7A  | 3427.31 | 1768.57 | 4900.77 | 35    |
| H7B  | 3479.21 | 647.49  | 4662.65 | 35    |
| H7C  | 3381.82 | 1419.31 | 3875.34 | 35    |
| H44A | 7098.32 | 6786.29 | 2757.5  | 33    |
| H44B | 7503.73 | 6929.85 | 3512.43 | 33    |
| H44C | 7079.04 | 7664.49 | 3453.87 | 33    |
| H43A | 5658.1  | 4797.97 | 3943.02 | 31    |
| H43B | 5968.47 | 3870.75 | 4185.67 | 31    |
| H43C | 6001.15 | 4387.02 | 3229.25 | 31    |
| H9A  | 5050.62 | 3748.44 | 4346.53 | 31    |
| H9B  | 5220.78 | 3267.65 | 5282.98 | 31    |
| H9C  | 4728.57 | 3781.08 | 5184.91 | 31    |

## 4. Chiral Resolution & Racemization Behavior

### 4.1. Separation of Enantiomers

A saturated solution (ca. 1 mL) of the respective helicene (~1 mg) in a mixture of *n*-hexane and DCM (9:1 for BN-helicenes, 1:1 for **CC[5]**, pure DCM for **CC[6]**) was prepared and subsequently passed through a PTFE syringe filter (pore size: 0.20  $\mu\text{m}$ ). Depending on the obtained resolution during method development, 15 - 200  $\mu\text{L}$  of the solutions were injected into the HPLC (Table S45) and the enantiomers were separated and collected. If required, impure fractions were subjected to further HPLC runs using the same conditions. This procedure was repeated until sufficient amounts of pure enantiomers were obtained. Enantiopure **BN[6]** was stored at ambient temperature (no notable racemization), while all five-membered helicenes were stored at  $-20\text{ }^\circ\text{C}$  due to a significant racemization rate under these conditions.

**Table S45.** Conditions and retention times  $t_{\text{R}}$  for the chiral resolution of the described helicenes on a semi-preparative Daicel Chiralpak IA HPLC column with chiral amylose stationary phase. Note that slight variations (usually less than  $\pm 0.1$  min) of the retention times were found.

| Compound                      | Eluent mixture             | Injection volume [ $\mu\text{L}$ ] | $t_{\text{R}}$ ( <i>P</i> ) [min]       | $t_{\text{R}}$ ( <i>M</i> ) [min] |
|-------------------------------|----------------------------|------------------------------------|-----------------------------------------|-----------------------------------|
| <b>BN[5]</b>                  | 8% DCM / <i>n</i> -Hexane  | 200                                | 6.47                                    | 7.57                              |
| <b>CC[5]</b>                  | 2% DCM / <i>n</i> -Hexane  | 25                                 | 10.14                                   | 11.46                             |
| <b>BN[6]</b>                  | 8% DCM / <i>n</i> -Hexane  | 200                                | 7.29                                    | 7.70                              |
| <b>CC[6]</b>                  | 2% DCM / <i>n</i> -Hexane  | 15                                 | 13.60 ( <i>no resolution achieved</i> ) |                                   |
| <b>BN[5]-(CN)<sub>2</sub></b> | 40% DCM / <i>n</i> -Hexane | 200                                | 6.57                                    | 7.67                              |



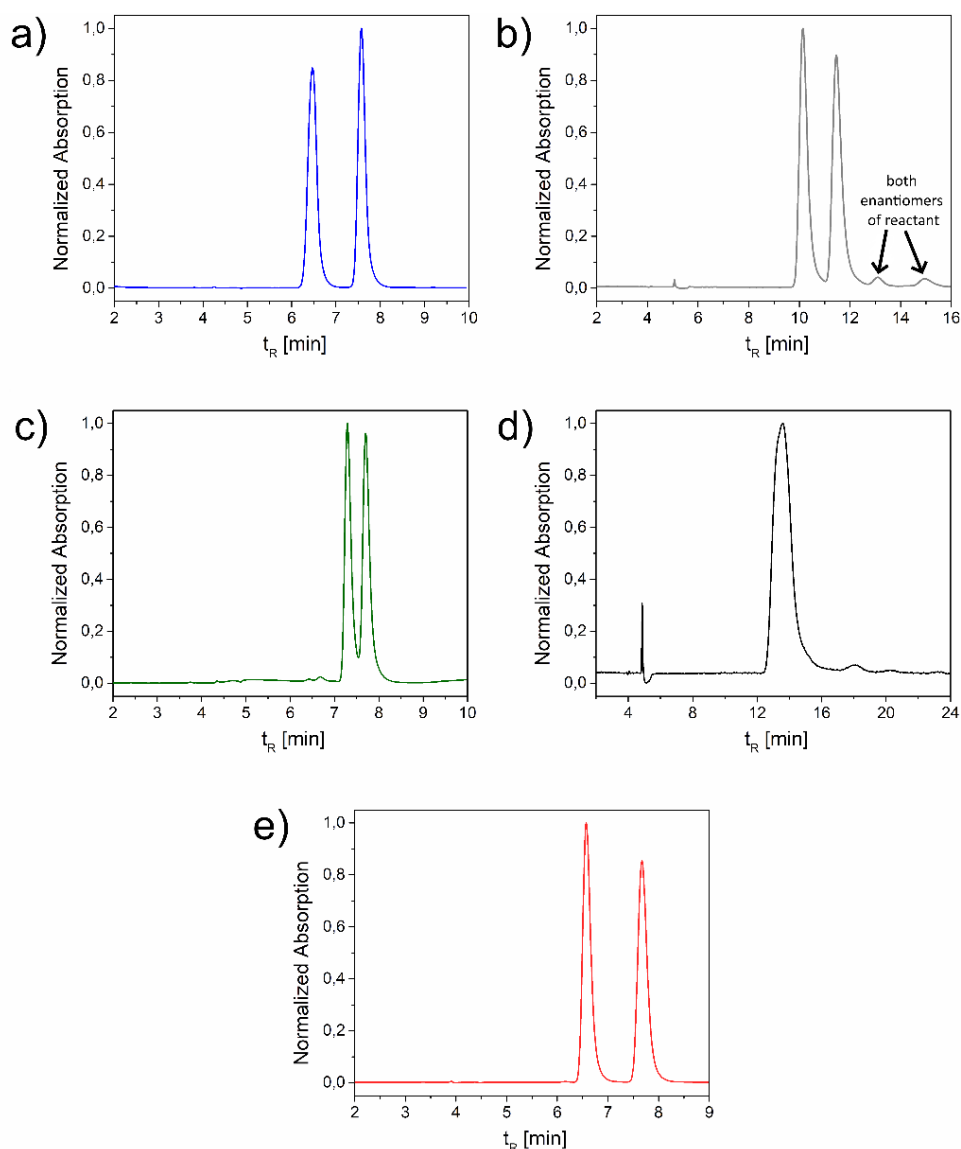

**Fig. S15.** (CSP)-HPLC chromatograms of **BN[5]** (a), **CC[5]** (b), **BN[6]** (c), **CC[6]** (d) and **BN[5]-(CN)<sub>2</sub>** (e). The signals at  $t_R = 4-5$  min represent the sample injection front. UV Vis absorption was recorded between  $\lambda = 280 - 350$  nm, where all compounds showed intense absorptions. Therefore, the chosen wavelength did not have an impact on the peak shapes.

## 4.2. Kinetics of Racemization

The racemization of the pentahelicenes (initial enantiomeric excess  $e_{e_0}$  (**BN[5]**) = 99%,  $e_{e_0}$  (**CC[5]**) = 70%,  $e_{e_0}$  (**BN[5]-(CN)<sub>2</sub>**) = 94%) was investigated by time-course ECD measurements at 50 °C, 60 °C and 70 °C in *n*-heptane (Fig. S16 and Table S46). The respective ellipticities at the intensity maxima were collected at equal time intervals and the enantiomeric excess ( $e_e$ ) was monitored.  $\ln(e_e/e_{e_0})$  was plotted against time and a linear fitting was applied to calculate the rate constant of racemization ( $k_{rac} = \text{slope}$ ). The half-life of racemization  $t_{1/2rac}$  was calculated by applying the equation

$$t_{1/2rac} = \frac{\ln(2)}{k_{rac}}$$

Using the Eyring-Polanyi equation

$$\Delta G^\ddagger(T) = -RT \ln \left( \frac{k_e \times h}{k_B \times T \times \kappa} \right),$$

the corresponding Gibbs' free activation energy of enantiomerization  $\Delta G^\ddagger(T)$  could be calculated for the investigated temperatures, using the constants  $R = 8.31441 \text{ J} \times \text{K}^{-1}$ ,  $h = 6.626176 \times 10^{-34} \text{ J} \times \text{s}$ ,  $k_B = 1.380662 \times 10^{-23} \text{ J} \times \text{K}^{-1}$  and  $k_e = 0.5 k_{rac}$ . The transmission coefficient  $\kappa = 0.5$  needs to be used because the enantiomerization process is a reversible reaction of first order.

Using the relation

$$\ln\left(\frac{k_e}{T}\right) = -\left(\frac{\Delta H^\ddagger}{R}\right) \times \left(\frac{1}{T}\right) + \ln\left(\frac{k \times k_B}{h}\right) + \frac{\Delta S^\ddagger}{R},$$

the respective activation enthalpies ( $\Delta H^\ddagger$ ) and entropies ( $\Delta S^\ddagger$ ) of racemization were calculated. For that purpose,  $\ln\left(\frac{k_e}{T}\right)$  was plotted against  $\left(\frac{1}{T}\right)$  for each temperature. The respective linear fittings ( $y = a - b \times x$ ) with slope  $-\left(\frac{\Delta H^\ddagger}{R}\right)$  and intercept  $\ln\left(\frac{k \times k_B}{h}\right) + \frac{\Delta S^\ddagger}{R}$  then allowed to derive these temperature-independent values (Table S47), which can be used to calculate  $\Delta G^\ddagger(T)$  at any temperature via the relation

$$\Delta G^\ddagger = \Delta H^\ddagger - T \times \Delta S^\ddagger.$$

**Table S46.** Kinetic parameters that describe the racemization process of enantioenriched samples, determined by time-course ECD measurements.

| Compound                      | $k_{\text{rac}} [\text{s}^{-1}]$ | $t_{1/2\text{rac}} [\text{min}]$ | $\Delta G^\ddagger(T) [\text{kcal mol}^{-1}]$ |
|-------------------------------|----------------------------------|----------------------------------|-----------------------------------------------|
| <b>BN[5]</b>                  |                                  |                                  |                                               |
| 50 °C                         | $5.34 \times 10^{-5}$            | 216.4                            | 25.3                                          |
| 60 °C                         | $1.49 \times 10^{-4}$            | 77.6                             | 25.4                                          |
| 70 °C                         | $8.82 \times 10^{-4}$            | 13.1                             | 25.0                                          |
| <b>CC[5]</b>                  |                                  |                                  |                                               |
| 50 °C                         | $1.55 \times 10^{-4}$            | 74.8                             | 24.6                                          |
| 60 °C                         | $5.47 \times 10^{-4}$            | 21.1                             | 24.5                                          |
| 70 °C                         | $1.20 \times 10^{-3}$            | 9.6                              | 24.8                                          |
| <b>BN[5]-(CN)<sub>2</sub></b> |                                  |                                  |                                               |
| 50 °C                         | $7.77 \times 10^{-5}$            | 148.6                            | 25.0                                          |
| 60 °C                         | $2.30 \times 10^{-4}$            | 50.3                             | 25.1                                          |
| 70 °C                         | $9.38 \times 10^{-4}$            | 12.3                             | 24.9                                          |

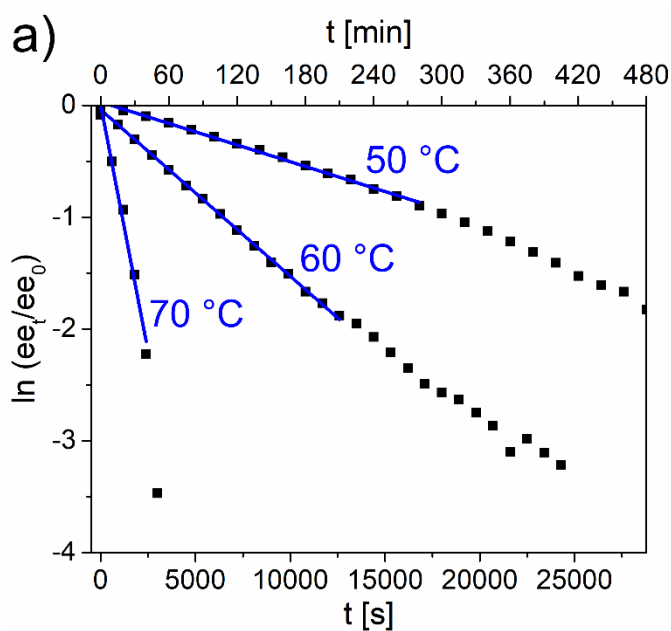

| Equation                |              | y = a + b*x    |            |
|-------------------------|--------------|----------------|------------|
| Weight                  | No Weighting |                |            |
| Residual Sum of Squares | 0.00322      |                |            |
| Pearson's r             | -0.9986      |                |            |
| Adj. R-Square           | 0.99699      |                |            |
|                         | Value        | Standard Error |            |
| 50 °C                   | Intercept    | 0.02971        | 0.00773    |
|                         | Slope        | -5.33871E-5    | 7.83402E-7 |

| Equation                |              | y = a + b*x    |            |
|-------------------------|--------------|----------------|------------|
| Weight                  | No Weighting |                |            |
| Residual Sum of Squares | 0.00316      |                |            |
| Pearson's r             | -0.99969     |                |            |
| Adj. R-Square           | 0.99932      |                |            |
|                         | Value        | Standard Error |            |
| 60 °C                   | Intercept    | -0.03804       | 0.00766    |
|                         | Slope        | -1.48923E-4    | 1.03495E-6 |

| Equation                |              | y = a + b*x    |           |
|-------------------------|--------------|----------------|-----------|
| Weight                  | No Weighting |                |           |
| Residual Sum of Squares | 0.04135      |                |           |
| Pearson's r             | -0.99269     |                |           |
| Adj. R-Square           | 0.98059      |                |           |
|                         | Value        | Standard Error |           |
| 70 °C                   | Intercept    | 0.00522        | 0.09094   |
|                         | Slope        | -8.81771E-4    | 6.1875E-6 |

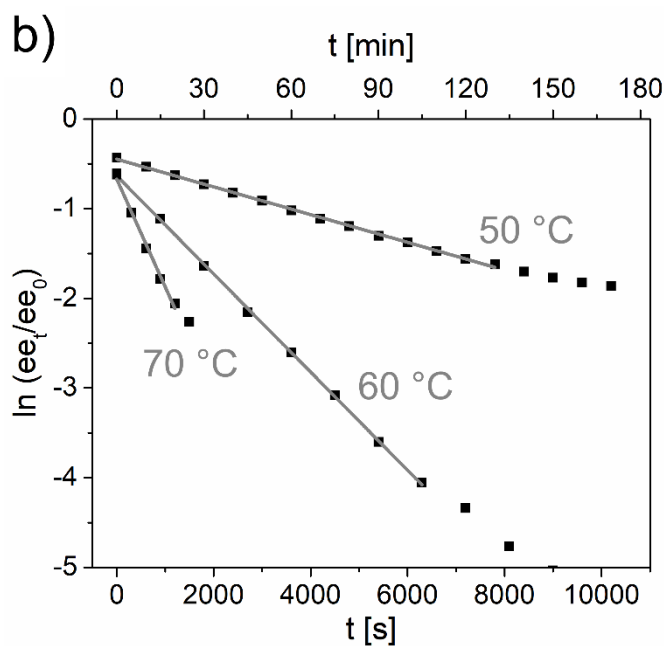

|                         |              |                |           |
|-------------------------|--------------|----------------|-----------|
| Equation                | y = a + b*x  |                |           |
| Weight                  | No Weighting |                |           |
| Residual Sum of Squares | 0.00224      |                |           |
| Pearson's r             | -0.99943     |                |           |
| Adj. R-Square           | 0.99876      |                |           |
|                         | Value        | Standard Error |           |
| 50 °C                   | Intercept    | -0.44773       | 0.00693   |
|                         | Slope        | -1.54506E-4    | 1.5099E-6 |

|                         |              |                |            |
|-------------------------|--------------|----------------|------------|
| Equation                | y = a + b*x  |                |            |
| Weight                  | No Weighting |                |            |
| Residual Sum of Squares | 0.00431      |                |            |
| Pearson's r             | -0.99979     |                |            |
| Adj. R-Square           | 0.99951      |                |            |
|                         | Value        | Standard Error |            |
| 60 °C                   | Intercept    | -0.63253       | 0.01729    |
|                         | Slope        | -5.47287E-4    | 4.59326E-6 |

|                         |              |                |            |
|-------------------------|--------------|----------------|------------|
| Equation                | y = a + b*x  |                |            |
| Weight                  | No Weighting |                |            |
| Residual Sum of Squares | 0.00981      |                |            |
| Pearson's r             | -0.99625     |                |            |
| Adj. R-Square           | 0.99001      |                |            |
|                         | Value        | Standard Error |            |
| 70 °C                   | Intercept    | -0.67009       | 0.04431    |
|                         | Slope        | -0.0012        | 6.02917E-5 |

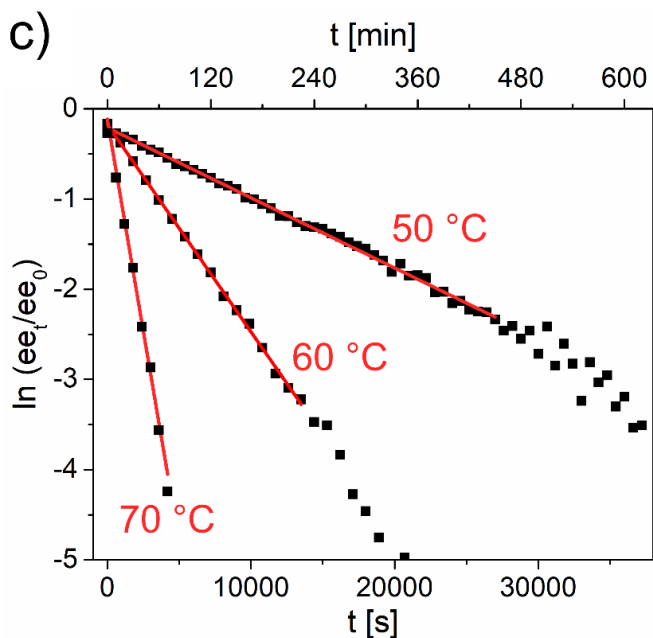

|                         |              |                |            |
|-------------------------|--------------|----------------|------------|
| Equation                | y = a + b*x  |                |            |
| Weight                  | No Weighting |                |            |
| Residual Sum of Squares | 0.05163      |                |            |
| Pearson's r             | -0.99854     |                |            |
| Adj. R-Square           | 0.99702      |                |            |
|                         | Value        | Standard Error |            |
| 50 °C                   | Intercept    | -0.2088        | 0.00994    |
|                         | Slope        | -7.77486E-5    | 6.34062E-7 |

|                         |              |                |            |
|-------------------------|--------------|----------------|------------|
| Equation                | y = a + b*x  |                |            |
| Weight                  | No Weighting |                |            |
| Residual Sum of Squares | 0.01575      |                |            |
| Pearson's r             | -0.99946     |                |            |
| Adj. R-Square           | 0.99884      |                |            |
|                         | Value        | Standard Error |            |
| 60 °C                   | Intercept    | -0.17391       | 0.01601    |
|                         | Slope        | -2.29709E-4    | 2.02128E-6 |

|                         |              |                |            |
|-------------------------|--------------|----------------|------------|
| Equation                | y = a + b*x  |                |            |
| Weight                  | No Weighting |                |            |
| Residual Sum of Squares | 0.05101      |                |            |
| Pearson's r             | -0.99809     |                |            |
| Adj. R-Square           | 0.99554      |                |            |
|                         | Value        | Standard Error |            |
| 70 °C                   | Intercept    | -0.11444       | 0.05952    |
|                         | Slope        | -9.37511E-4    | 2.37121E-5 |

Fig. S16. Plots of  $\ln(ee_t/ee_0)$  against time and linear fittings for **BN[5]** (a), **CC[5]** (b) and **BN[5]-(CN)<sub>2</sub>** (c) at different temperatures.

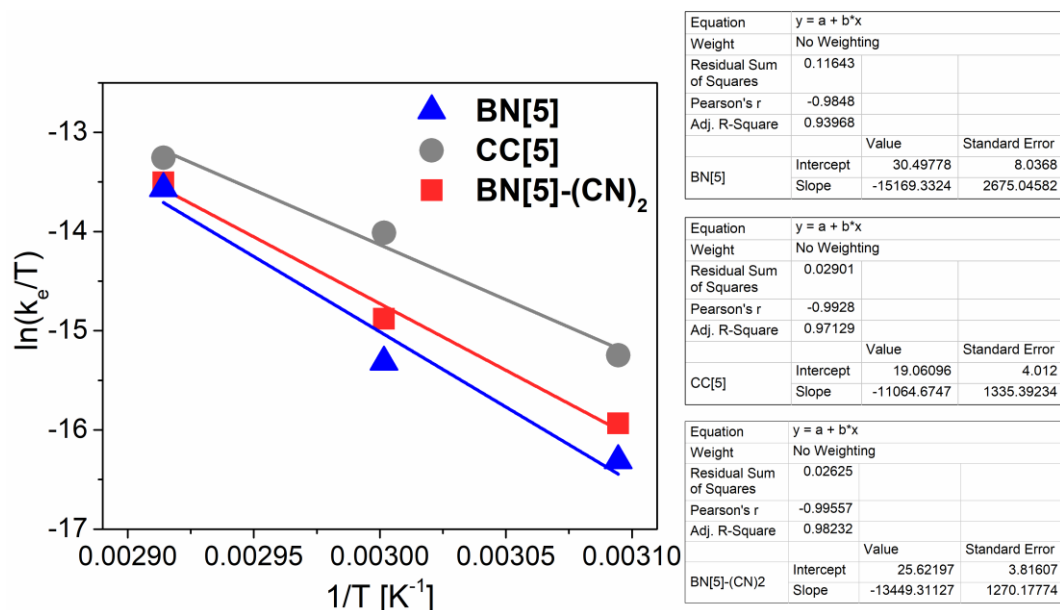

**Fig. S17.** Eyring-Polanyi plot of the investigated pentahelicenes at 50 °C, 60 °C and 70 °C.

**Table S47.** Fitting parameters of Eyring-Polanyi plot as well as calculated  $\Delta H^\ddagger$ ,  $\Delta S^\ddagger$  and  $\Delta G^\ddagger$  at 25 °C.

| Compound                      | Intercept (a) | Slope (b) | $\Delta H^\ddagger$ [kcal mol <sup>-1</sup> ] | $\Delta S^\ddagger$ [cal mol <sup>-1</sup> K <sup>-1</sup> ] | $\Delta G^\ddagger$ (25 °C) [kcal mol <sup>-1</sup> ] |
|-------------------------------|---------------|-----------|-----------------------------------------------|--------------------------------------------------------------|-------------------------------------------------------|
| <b>BN[5]</b>                  | 30.50         | - 15 169  | 30.12                                         | 14.76                                                        | 25.7                                                  |
| <b>CC[5]</b>                  | 19.06         | - 11 065  | 21.97                                         | -7.96                                                        | 24.3                                                  |
| <b>BN[5]-(CN)<sub>2</sub></b> | 25.62         | - 13 449  | 26.71                                         | 5.07                                                         | 25.2                                                  |

As carbohelicene **CC[6]** was not resolvable by (CSP)-HPLC, **BN[6]** was the only hexahelicene that was to be subjected to a racemization study. However, heating an enantiopure sample ( $e_e = 99\%$ ) of (*P*)-**BN[6]** in *n*-dodecane to 200 °C for 14 h did not lead to a detectable amount of the other enantiomer. Increasing the temperature to 220 °C for 30 min resulted in decomposition. Therefore, kinetic parameters of the hexahelicenes could not be collected.

## 5. Optical Spectroscopy

### 5.1. Molar Extinction Coefficients

1,14-Dihydro-2,13-dimesityl-1,14-diaza-2,13-diborapentahelicene (**BN[5]**)

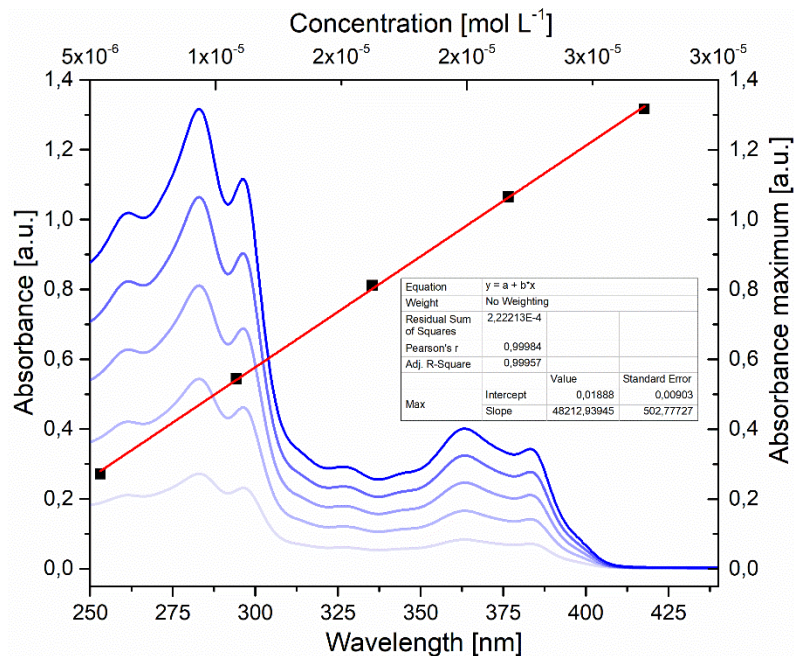

**Fig. S18.** Absorption spectra of **BN[5]** at different concentrations ( $5.4 \times 10^{-6}$  to  $2.7 \times 10^{-5}$  mol L<sup>-1</sup>) in DCM and linear fitting according to the Lambert-Beer law.

2,13-Dimesitylpentahelicene (**CC[5]**)

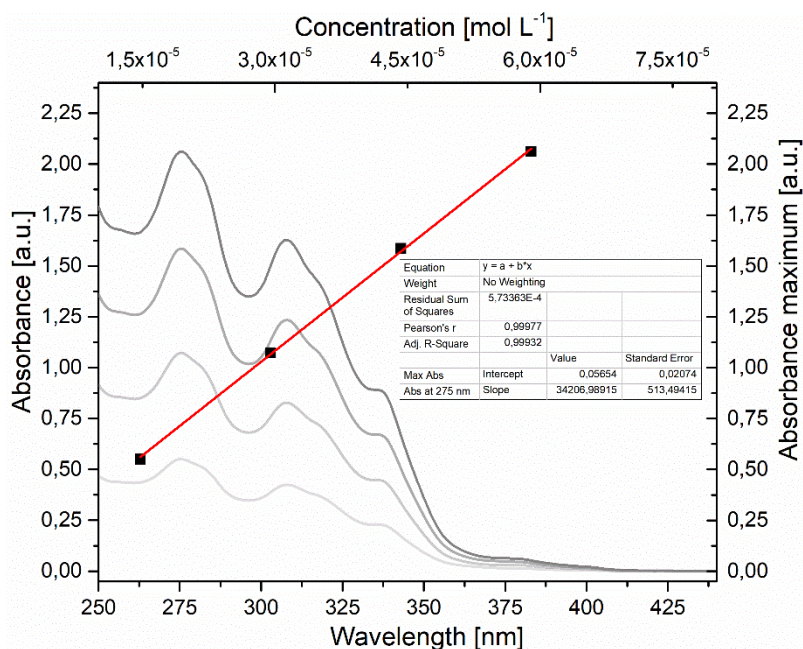

**Fig. S19.** Absorption spectra of **CC[5]** in different concentrations ( $1.5 \times 10^{-5}$  to  $5.9 \times 10^{-5}$  mol L<sup>-1</sup>) in DCM and linear fitting according to the Lambert-Beer law.

1,16-Dihydro-2,15-dimesityl-1,16-diaza-2,15-diborahexahelicene (**BN[6]**)

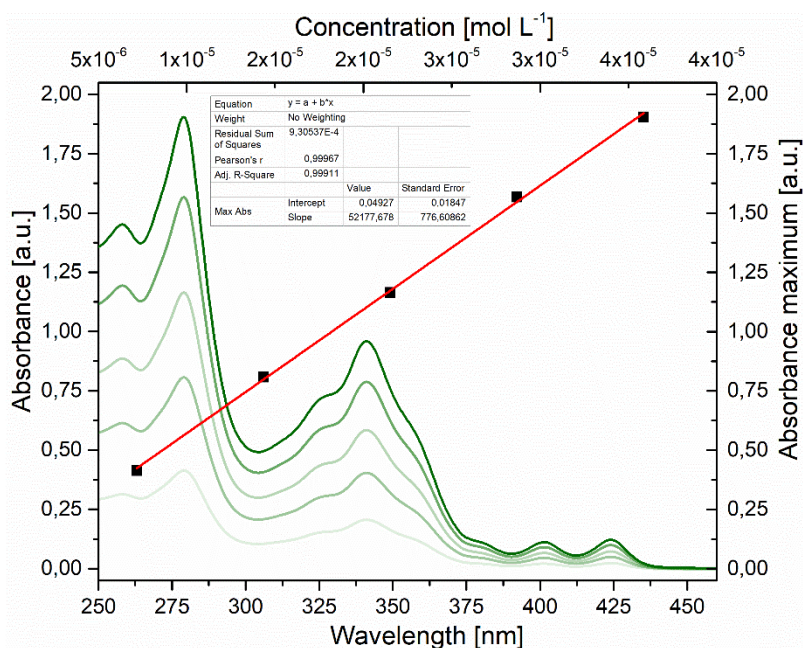

**Fig. S20.** Absorption spectra of **BN[6]** in different concentrations ( $7.2 \times 10^{-6}$  to  $3.6 \times 10^{-5}$  mol L<sup>-1</sup>) in DCM and linear fitting according to the Lambert-Beer law.

2,15-Dimesitylhexahelicene (**CC[6]**)

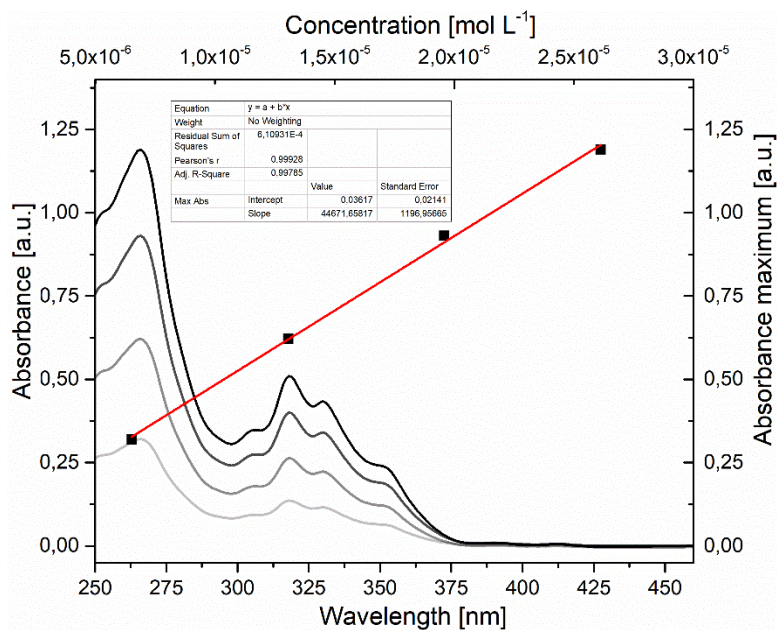

**Fig. S21.** Absorption spectra of **CC[6]** in different concentrations ( $6.5 \times 10^{-6}$  to  $2.6 \times 10^{-5}$  mol L<sup>-1</sup>) in DCM and linear fitting according to the Lambert-Beer law.

3,12-Dicyano-1,14-dihydro-2,13-dimesityl-1,14-diaza-2,13-diborapentahelicene (**BN[5]-(CN)<sub>2</sub>**)

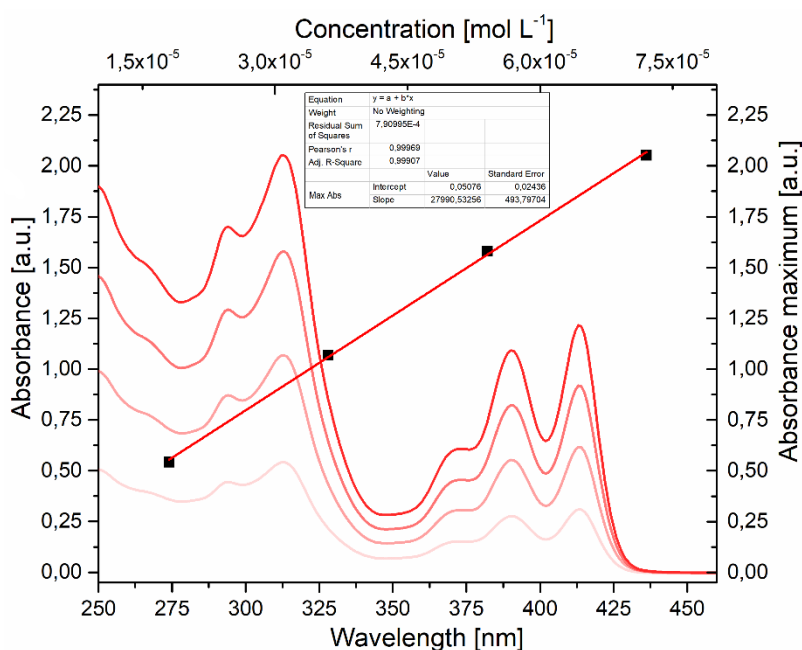

**Fig. S22.** Absorption spectra of **BN[5]-(CN)<sub>2</sub>** in different concentrations ( $1.8 \times 10^{-5}$  to  $9.0 \times 10^{-5}$  mol L<sup>-1</sup>) in DCM and linear fitting according to the Lambert-Beer law.

## 5.2. Excitation Spectra

In order to choose the most suitable excitation wavelength ( $\lambda_{ex}$ ) to carry out the emission measurements, we initially measured different excitation spectra in DCM as solvent. Fluorescence emission wavelengths ( $\lambda_{fl}$ ) were fixed at different wavelengths around local maxima. Fig. S23 highlights that the highest intensities of the excitation curves of the BN-helicenes were between  $\lambda_{ex} = 360$  nm and  $\lambda_{ex} = 380$  nm, so we measured emission spectra with  $\lambda_{ex} = 375$  nm. For the carbohelicenes, the highest intensities of the excitation curves (besides maxima in the high-energy region of 280 nm) were between  $\lambda_{ex} = 300$  nm and  $\lambda_{ex} = 340$  nm, so we chose to measure the emission spectra with  $\lambda_{ex} = 320$  nm.

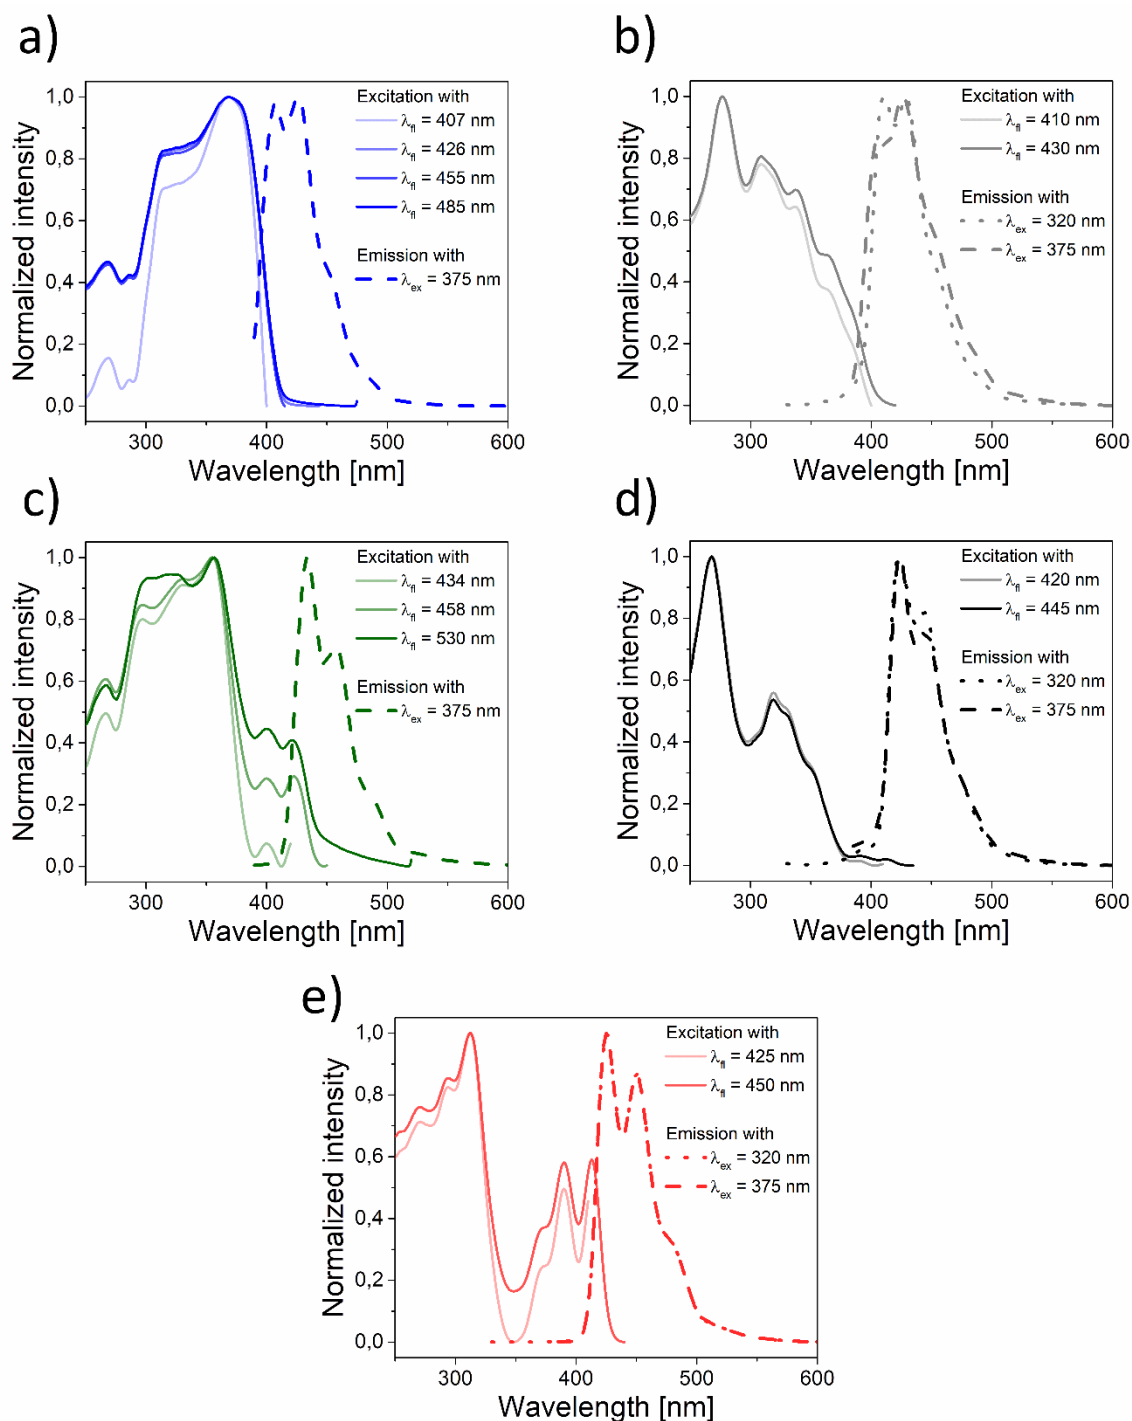

**Fig. S23.** Normalized excitation spectra at different, fixed emission wavelengths (solid lines) and normalized emission spectra, obtained at different excitation wavelengths (dashed and dotted lines) of **BN[5]** (a), **CC[5]** (b), **BN[6]** (c), **CC[6]** (d), **BN[5]-(CN)<sub>2</sub>** (e) in DCM solution.

### 5.3. Fluorescence Lifetimes

Fluorescence lifetimes were measured in DCM around the main emissive peaks ( $\Delta\lambda_{fl} \pm 10$  nm) observed in the fluorescence spectra, using a 375 nm laser as excitation source for the BN-helicenes and a 320 nm LED as excitation source for the carbohelicenes. Table S48 shows the lifetime distributions. While **BN[5]** and its substitute **BN[5]-(CN)<sub>2</sub>** have just one lifetime component ( $\tau = 4.7$  ns /  $\tau = 3.5$  ns), the decay curves of **BN[6]**, **CC[5]** and **CC[6]** have biexponential character with higher average lifetimes of  $\tau = 7$ –10 ns. The influence of one additional, conjugated ring on the lifetime was small ( $\Delta\tau < 1$  ns between **CC[5]** and **CC[6]**).



**Table S48.** Fluorescence lifetimes  $\tau$  of the helicenes around the main emissive peaks.

| Compound                      | Emission wavelength range [nm] | $\tau_1$ [ns] | $\tau_2$ [ns] | $\tau_{\text{average}}$ [ns] |
|-------------------------------|--------------------------------|---------------|---------------|------------------------------|
| <b>BN[5]</b>                  | 405 – 425                      | 4.73±0.02     |               | 4.73                         |
| <b>CC[5]</b>                  | 410 – 430                      | 11.09±0.04    | 1.03±0.002    | 9.66                         |
| <b>BN[6]</b>                  | 430 – 460                      | 7.21±0.02     | 1.58±0.37     | 7.13                         |
| <b>CC[6]</b>                  | 425 – 445                      | 8.95±0.03     | 3.27±0.26     | 8.71                         |
| <b>BN[5]-(CN)<sub>2</sub></b> | 425 – 445                      | 3.545±0.01    |               | 3.55                         |

In order to extract more information about the multi-exponential characters, we also performed TRES of the compounds that showed more than one lifetime component. This enabled the deconvolution of the emission (Fig. S24). A 325 nm LED was used as excitation source.

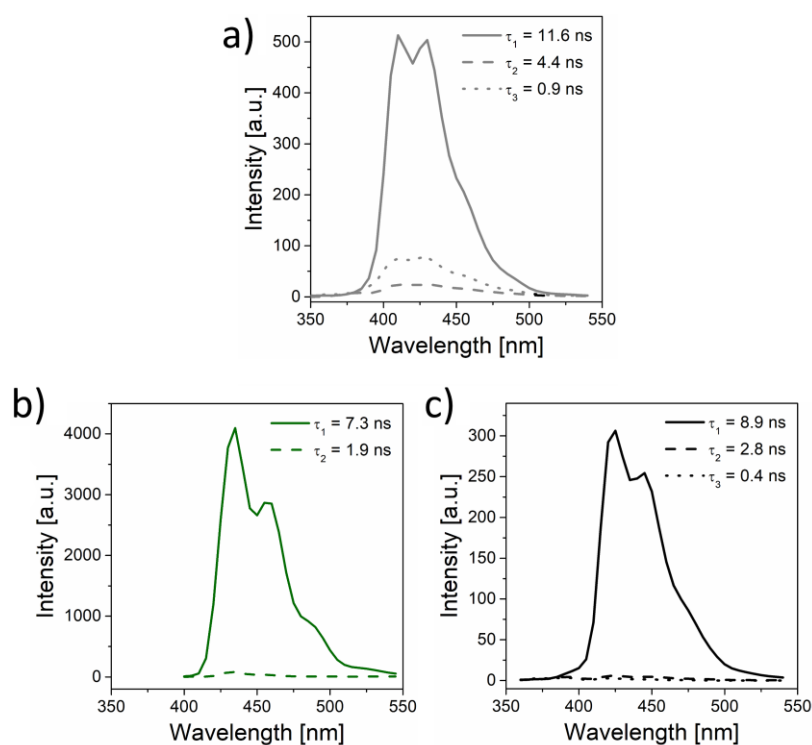

**Fig. S24.** SAEMS spectra of **CC[5]** (a), **BN[6]** (b) and **CC[6]** (c) in DCM solution.

The deconvolution of the spectra over the emission range showed that for all compounds, the species with the longest lifetimes contributed most to the shape and intensity of the fluorescence spectra. In case of both hexahelicenes, the contributions of the shorter lifetimes were negligibly small. Therefore, average lifetimes are similar to the comparably longest components. Both carbohelicenes showed three species in the excited state, although the shortest lifetime observed in **CC[6]** may be due to dispersion. These results also reveal the independence of fluorescence lifetimes and excitation wavelengths (note that values shown in Table S48 were recorded at  $\lambda_{\text{ex}} = 375$  nm, whereas TRES was carried out at  $\lambda_{\text{ex}} = 325$  nm).

#### 5.4. ECD Spectra

Fig. S25 shows plots of the absorption dissymmetry factors ( $g_{\text{abs}}$ ). The values as obtained from the ECD spectrometer can be interconverted between ellipticity in millidegrees (mdeg) and milliabsorbance (mAbs) using the relation

$$\text{mAbs} = \frac{\text{mdeg}}{32.982}$$

The molar extinction  $\Delta\epsilon$  at a specific wavelength is calculated using the relation

$$\Delta\epsilon = \frac{\text{mdeg} \times M}{32982 \times c}$$

$M$  is the molar weight in  $\text{g mol}^{-1}$ ,  $L$  is the path length (1 cm) and  $c$  is the sample concentration in  $\text{g L}^{-1}$ .  $g_{\text{abs}}$  is obtained using the relation

$$g_{\text{abs}} = \frac{\Delta\epsilon}{\epsilon}$$

where  $\epsilon$  is the molar extinction coefficient at a specific wavelength as calculated above.

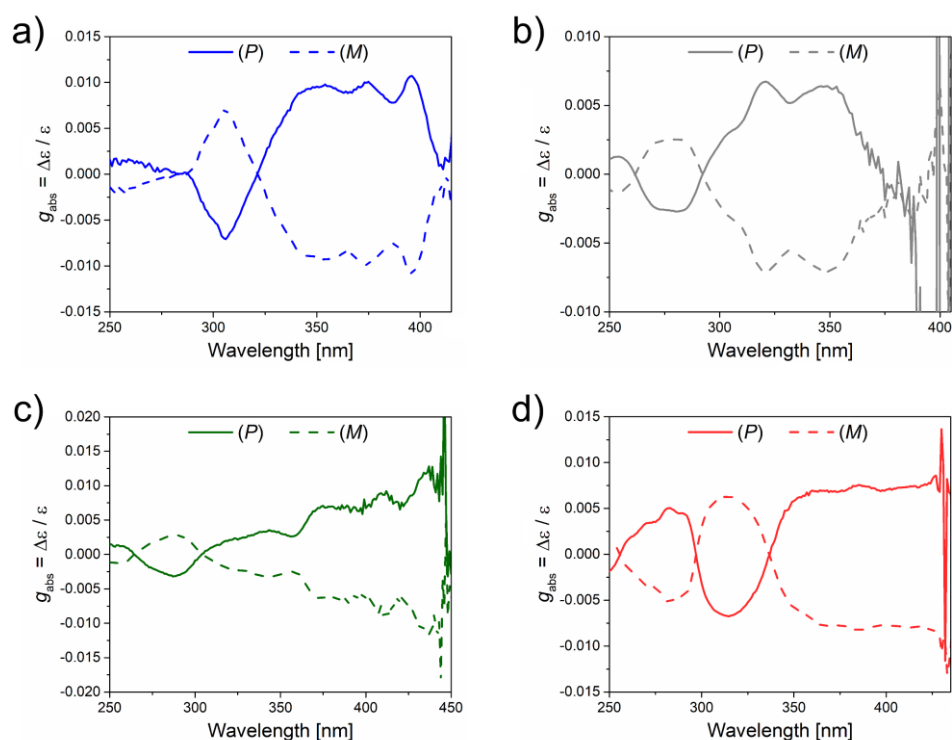

**Fig. S25.** Plots of the absorption dissymmetry factors ( $g_{\text{abs}}$ ) for **BN[5]** (a), **CC[5]** (b), **BN[6]** (c) and **BN[5]-(CN)<sub>2</sub>** (d) in DCM solution.

## 5.5. CPL Spectra

The obtained intensities of left- and right-handed polarized light ( $I_L$  and  $I_R$ , averaged over at least 50 scans, respectively) were used to calculate the luminescence dissymmetry factors  $g_{\text{lum}}$  (Fig. S27), using the equation

$$g_{\text{lum}} = 2 \times \frac{I_L - I_R}{I_L + I_R}$$

The  $g_{\text{lum}}$  value can range between  $-2$  and  $+2$ , where  $0$  indicates entirely unpolarized light and  $|2|$  represents completely polarized light.

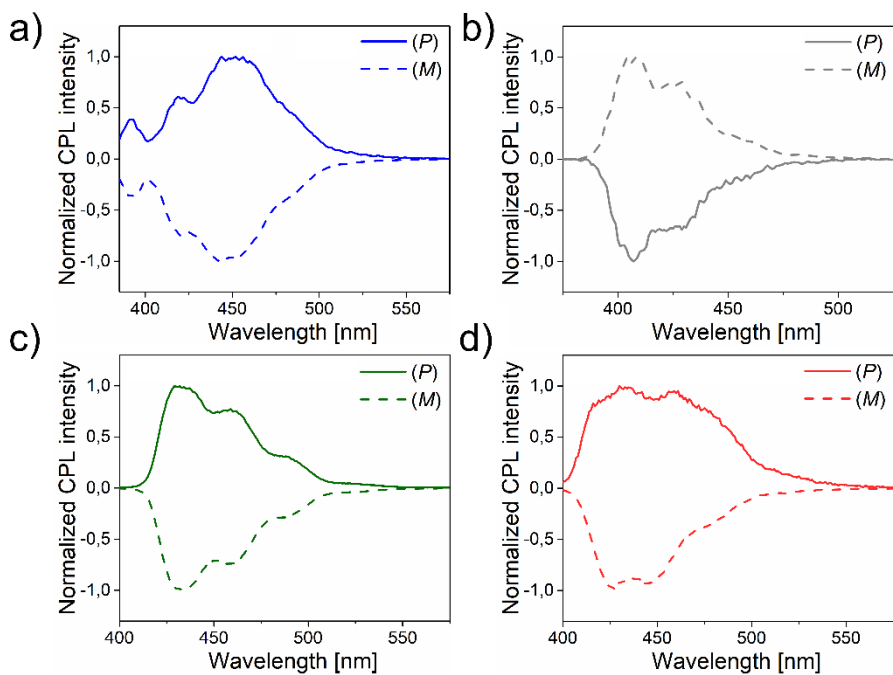

Fig. S26. Normalized CPL spectra of both enantiomers of **BN[5]** (a), **CC[5]** (b), **BN[6]** (c) and **BN[5]-(CN)<sub>2</sub>** (d) in DCM solution.

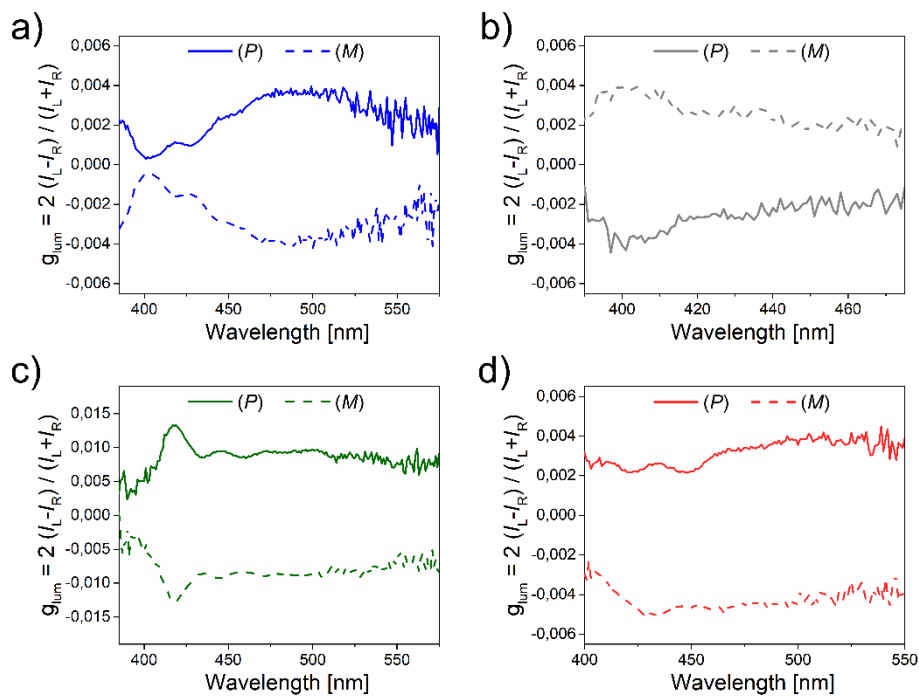

Fig. S27. Plots of the luminescence dissymmetry factors ( $g_{lum}$ ) for **BN[5]** (a), **CC[5]** (b), **BN[6]** (c) and **BN[5]-(CN)<sub>2</sub>** (d) in DCM solution.

## 6. NMR Spectra

### 6.1. 1-Hydro-2-mesityl-1,2-azaborinine (14)

$^1\text{H}$  NMR (500 MHz,  $\text{CDCl}_3$ )

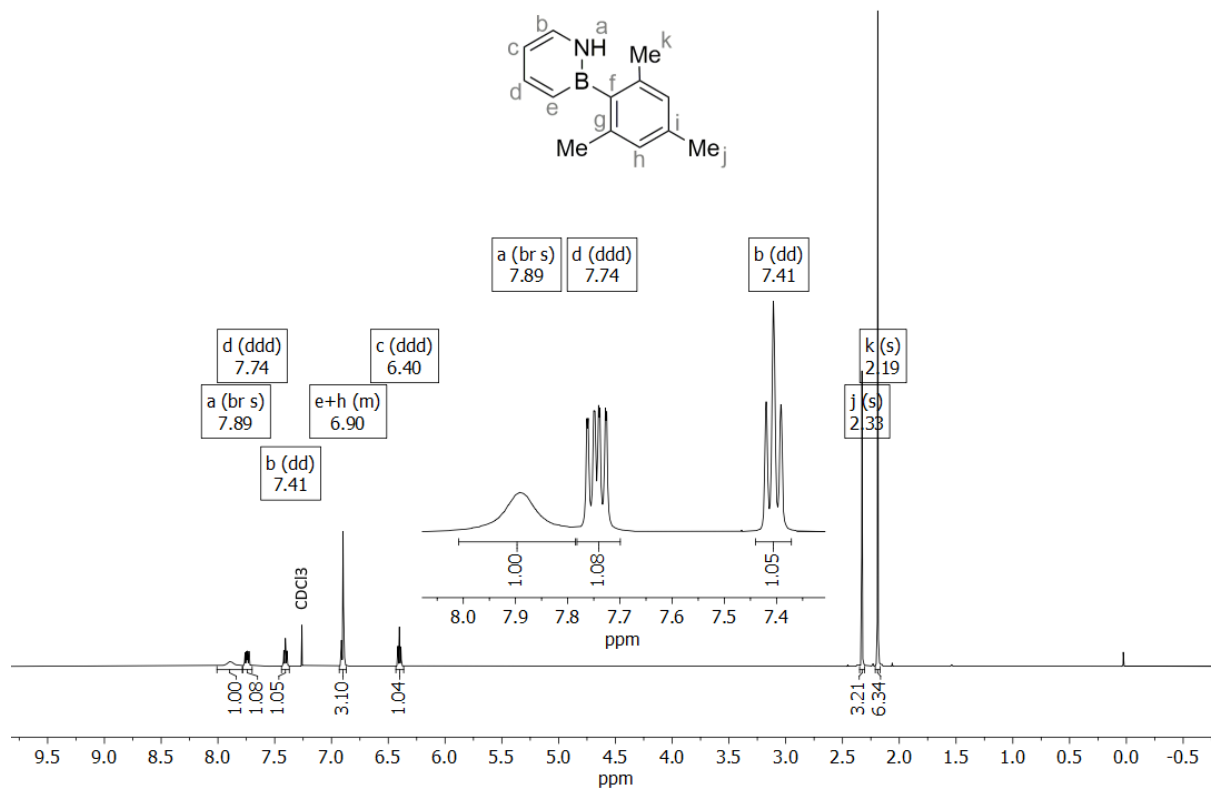

$^{13}\text{C}\{^1\text{H}\}$  NMR (126 MHz,  $\text{CDCl}_3$ )

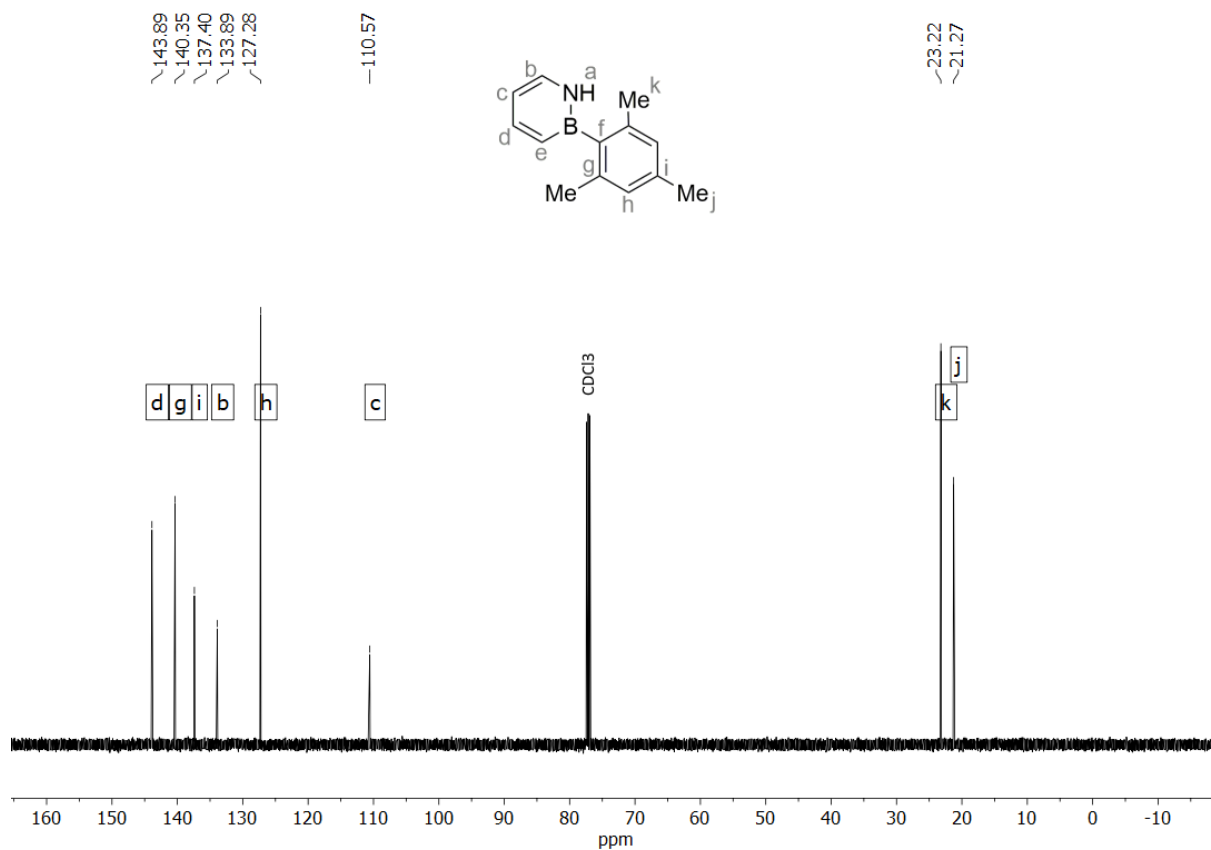

$^{11}\text{B}\{^1\text{H}\}$  NMR (160 MHz,  $\text{CDCl}_3$ )

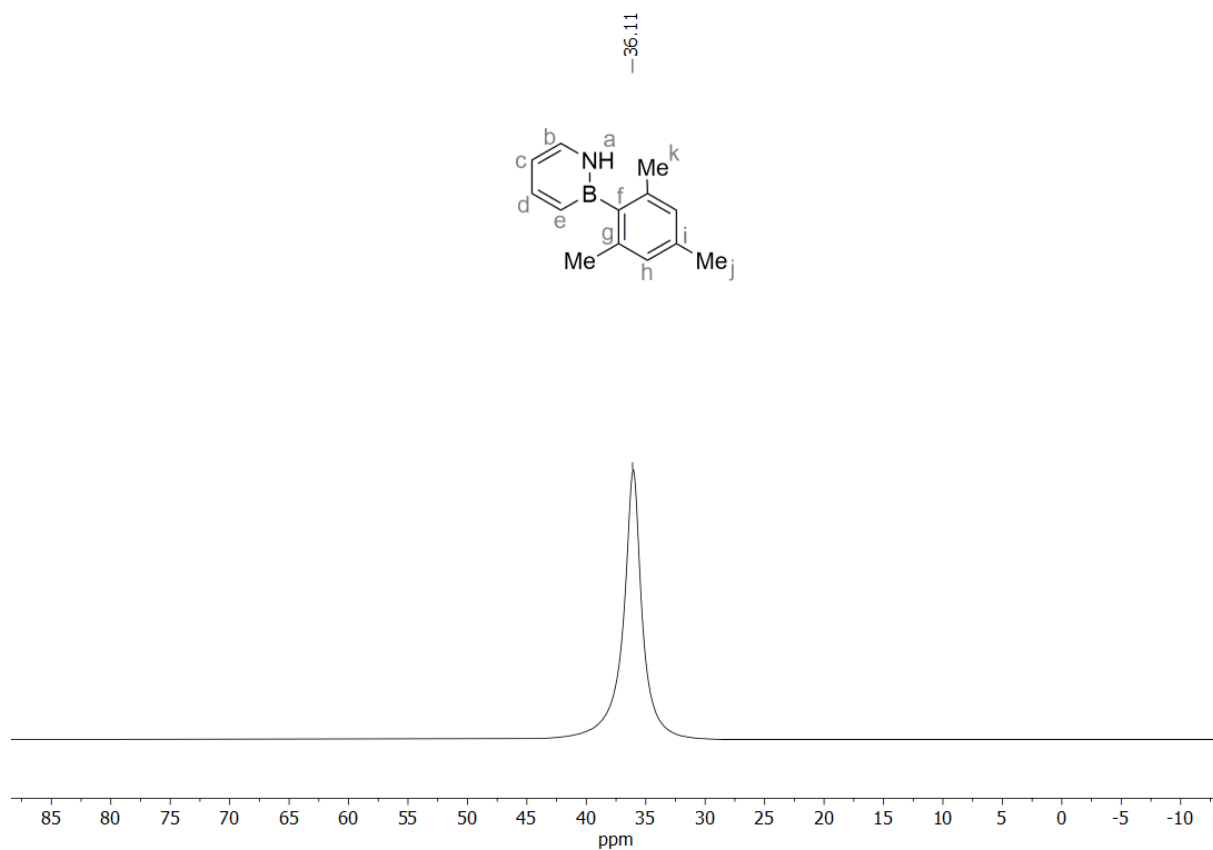

## 6.2. 1-Hydro-2-mesityl-6-(4,4,5,5-tetramethyl-1,3,2-dioxaborolan-2-yl)-1,2-azaborinine (3)

$^1\text{H}$  NMR (500 MHz,  $\text{CDCl}_3$ )

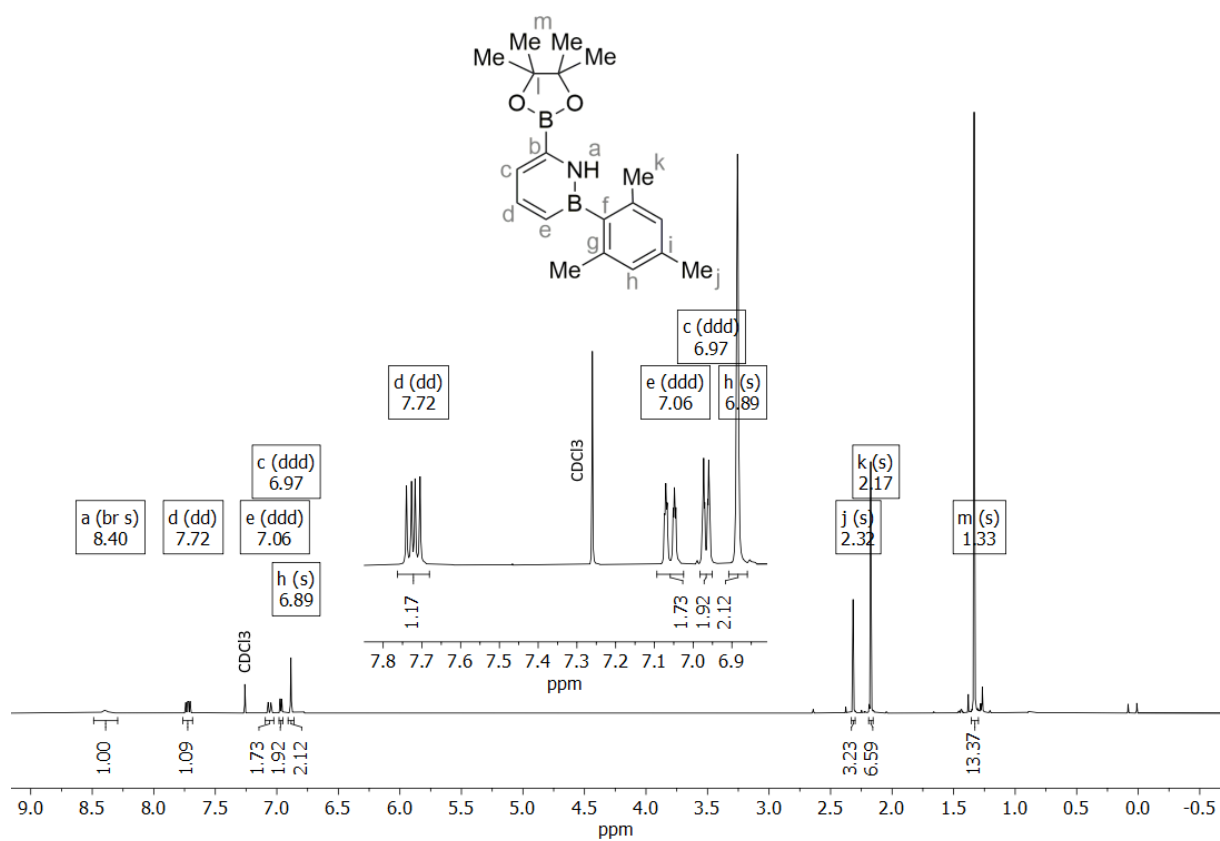

$^{13}\text{C}\{^1\text{H}\}$  NMR (126 MHz,  $\text{CDCl}_3$ )

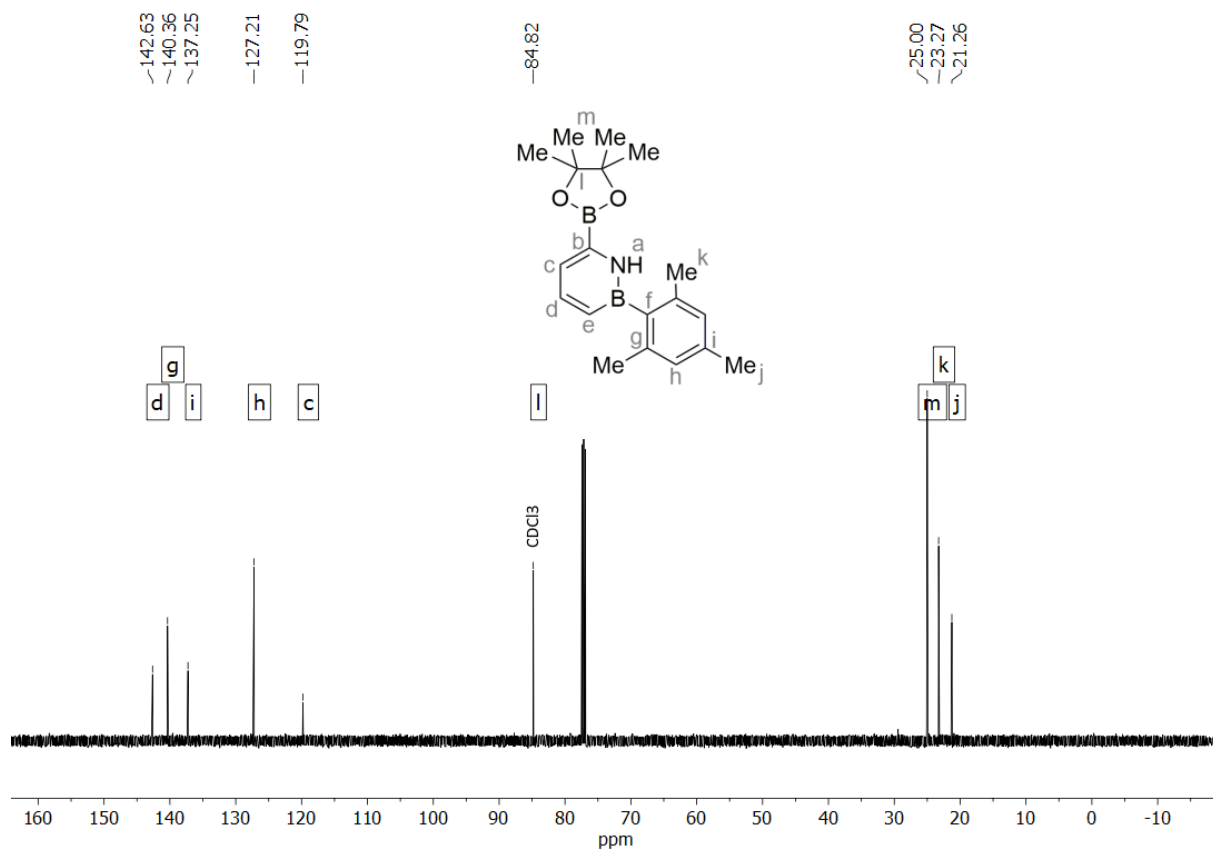

$^{11}\text{B}\{^1\text{H}\}$  NMR (160 MHz,  $\text{CDCl}_3$ )

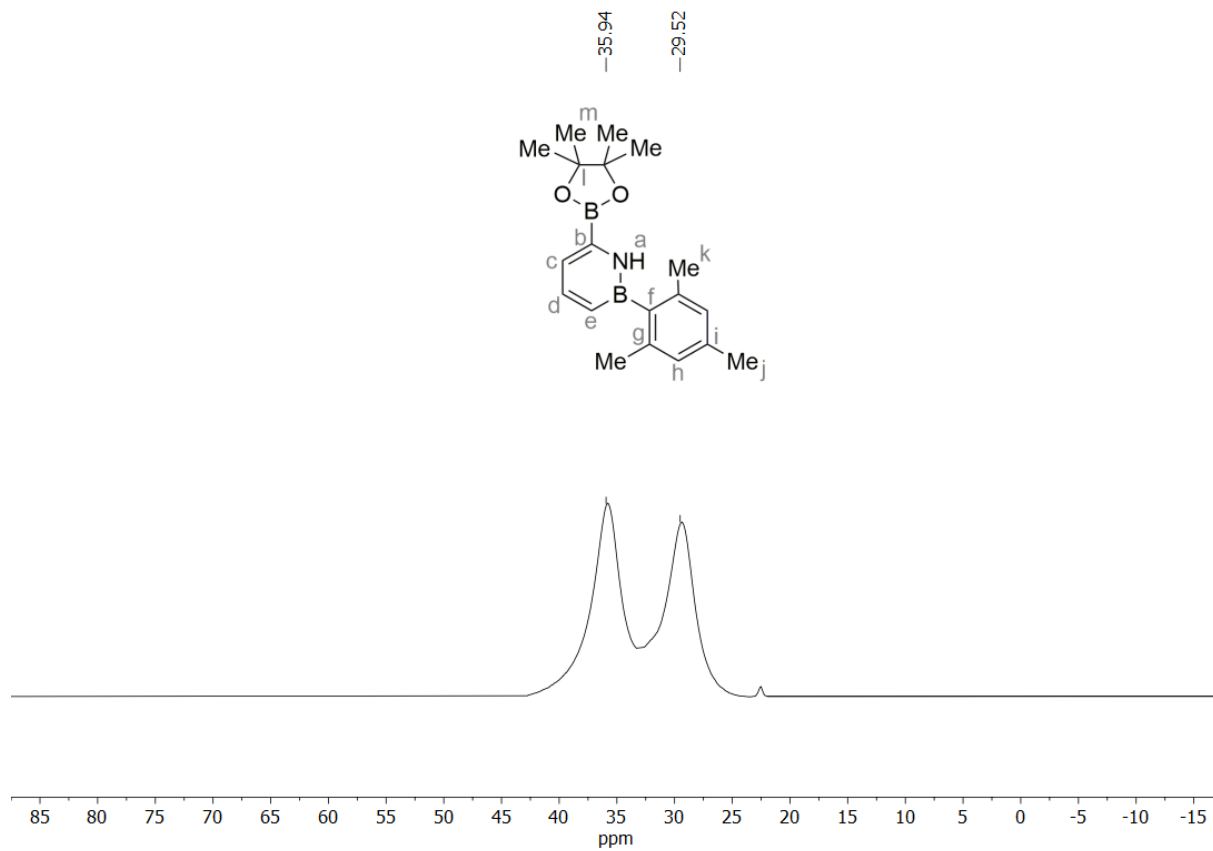

### 6.3. 1,4-bis(trimethylsilyl)-2,3-dibromobenzene (15)

$^1\text{H}$  NMR (500 MHz,  $\text{CDCl}_3$ )

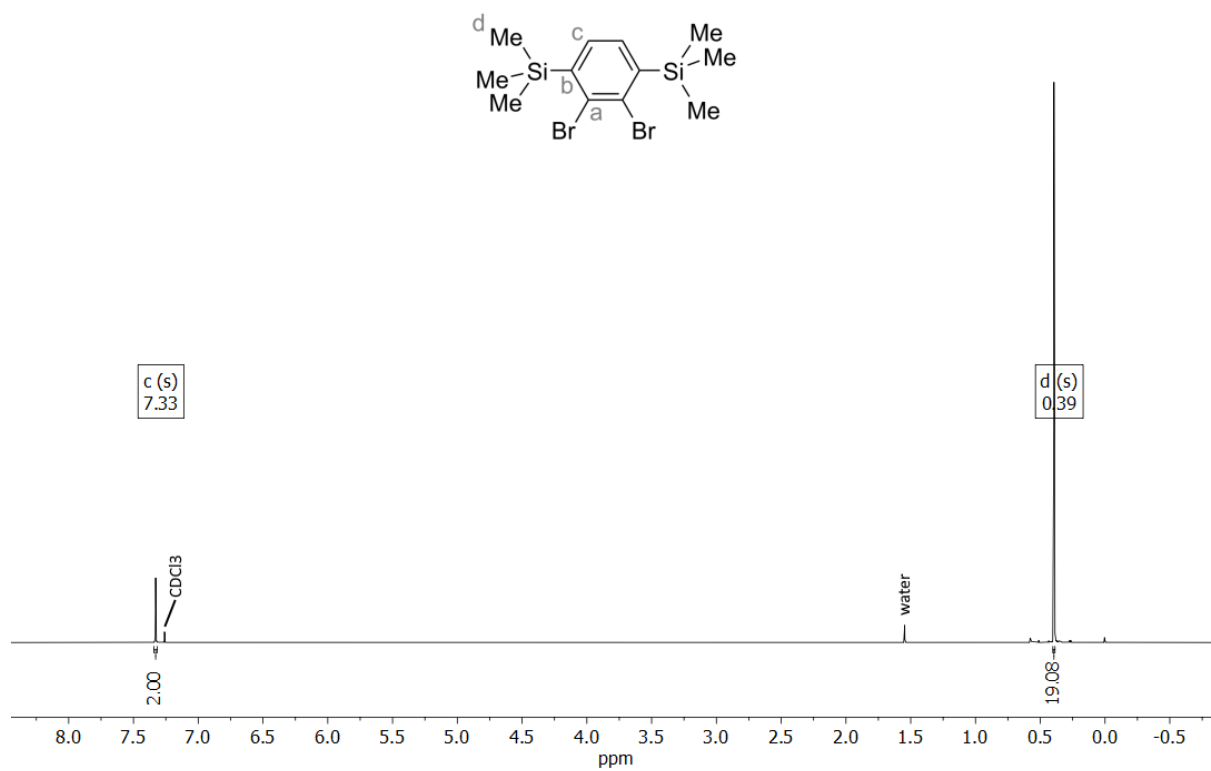

$^{13}\text{C}\{^1\text{H}\}$  NMR (126 MHz,  $\text{CDCl}_3$ )

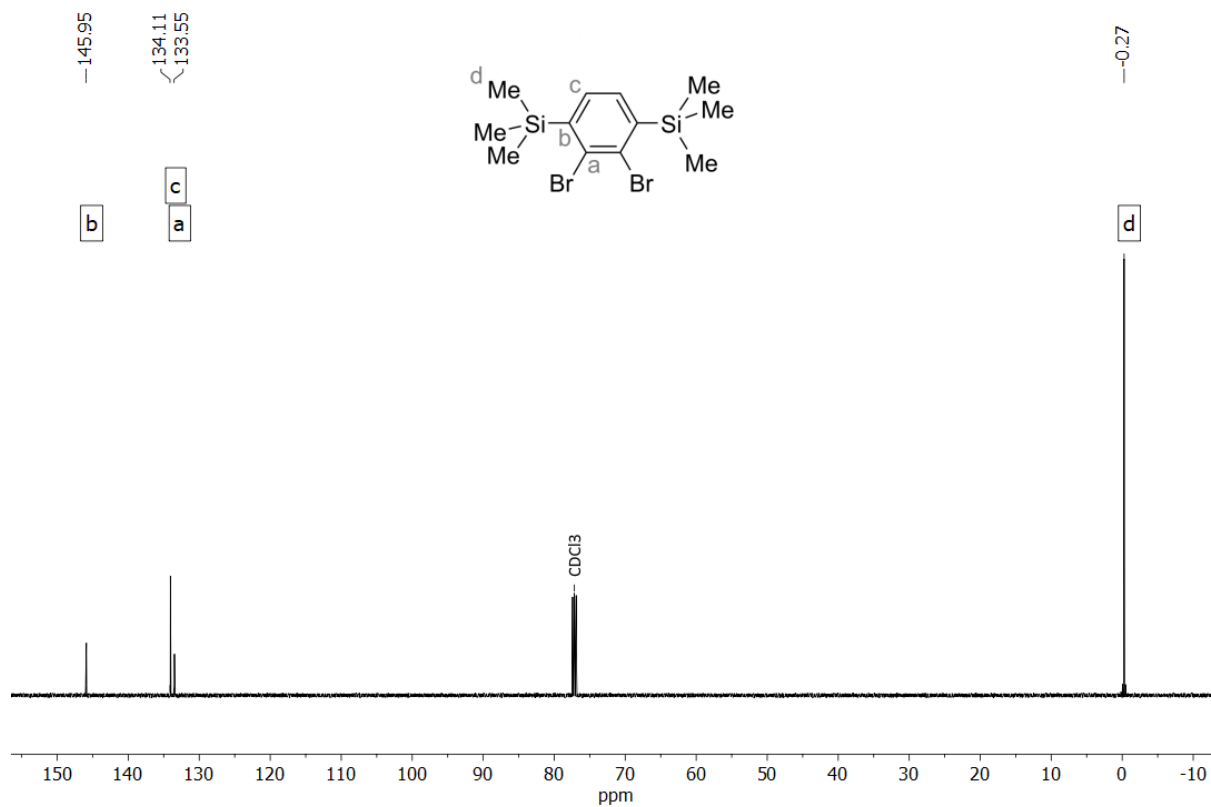

$^{29}\text{Si}\{^1\text{H}\}$  NMR (99 MHz,  $\text{CDCl}_3$ )

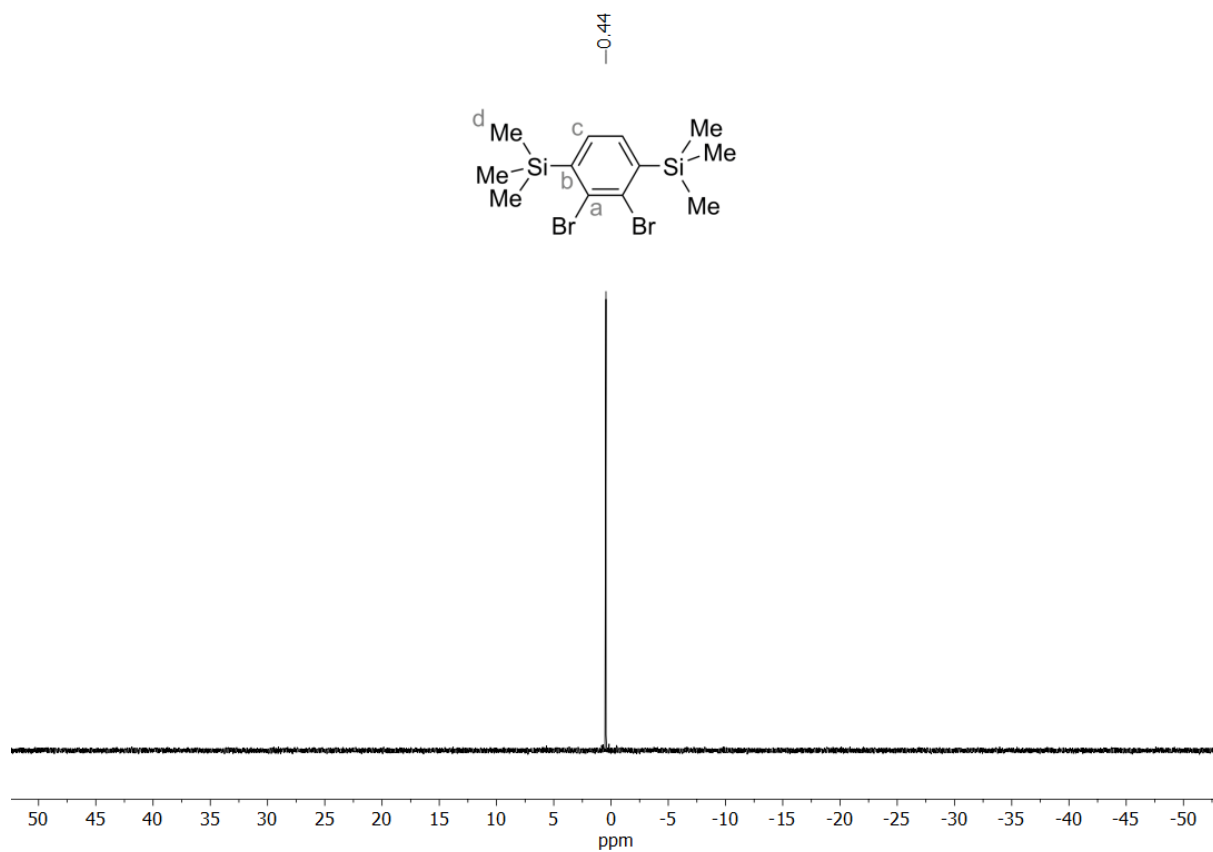

#### 6.4. 2,3-Dibromo-1,4-diiodobenzene (16)

$^1\text{H}$  NMR (500 MHz,  $\text{CDCl}_3$ )

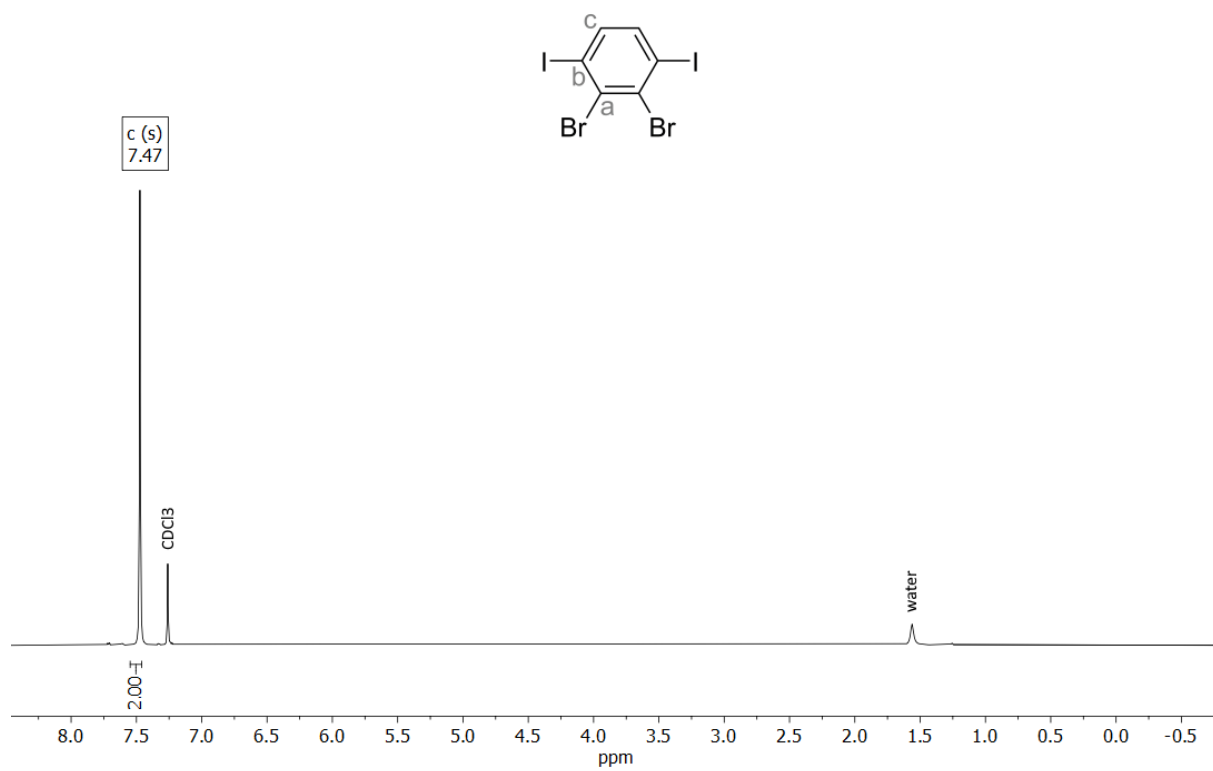



$^{13}\text{C}\{^1\text{H}\}$  NMR (126 MHz,  $\text{CDCl}_3$ )

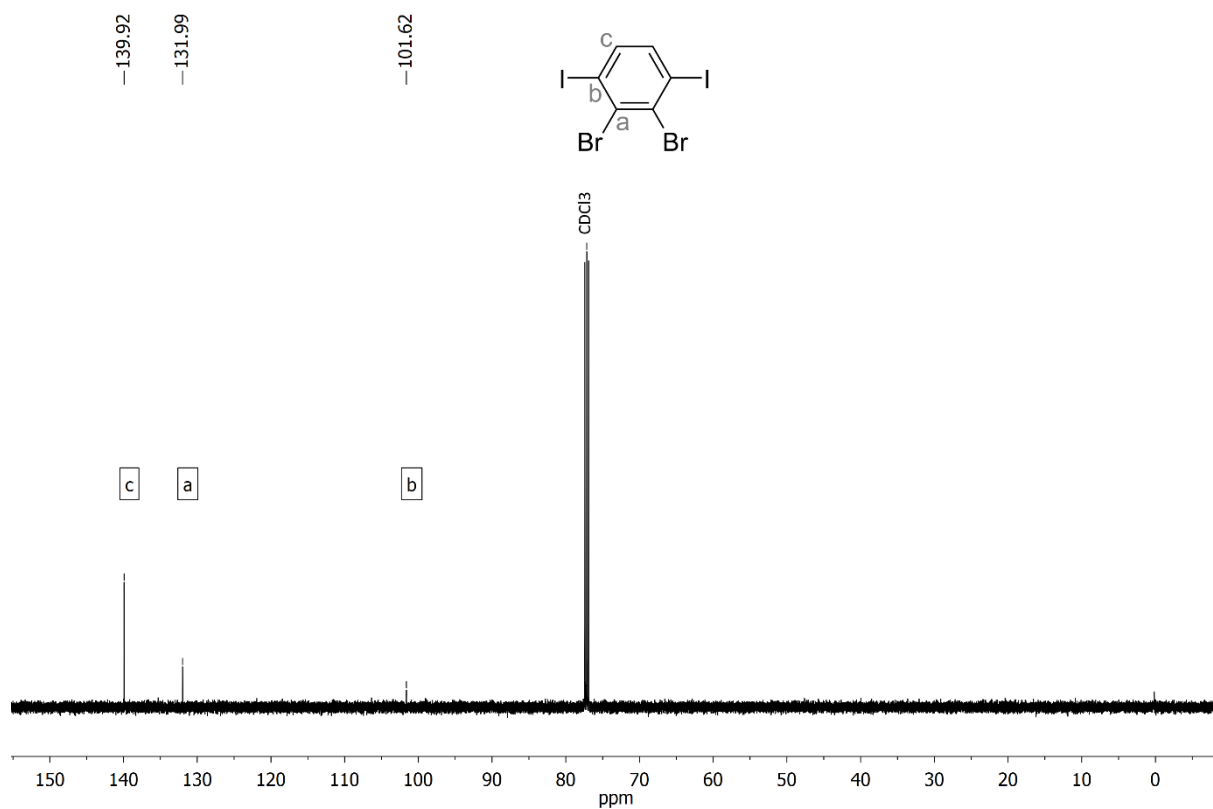

### 6.5. 2,3-Dibromo-1,4-bis(trimethylsilylethynyl)benzene (1)

$^1\text{H}$  NMR (601 MHz,  $\text{CDCl}_3$ )

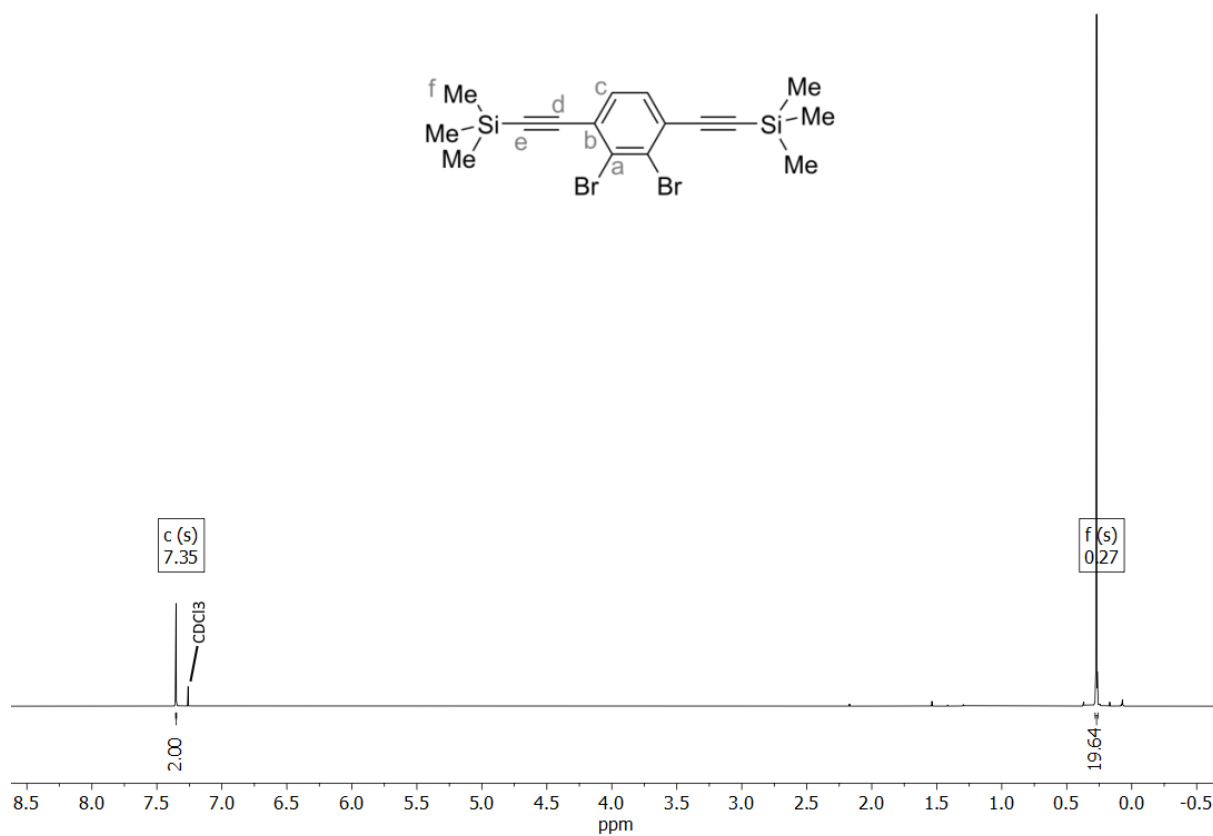

$^{13}\text{C}\{^1\text{H}\}$  NMR (151 MHz,  $\text{CDCl}_3$ )

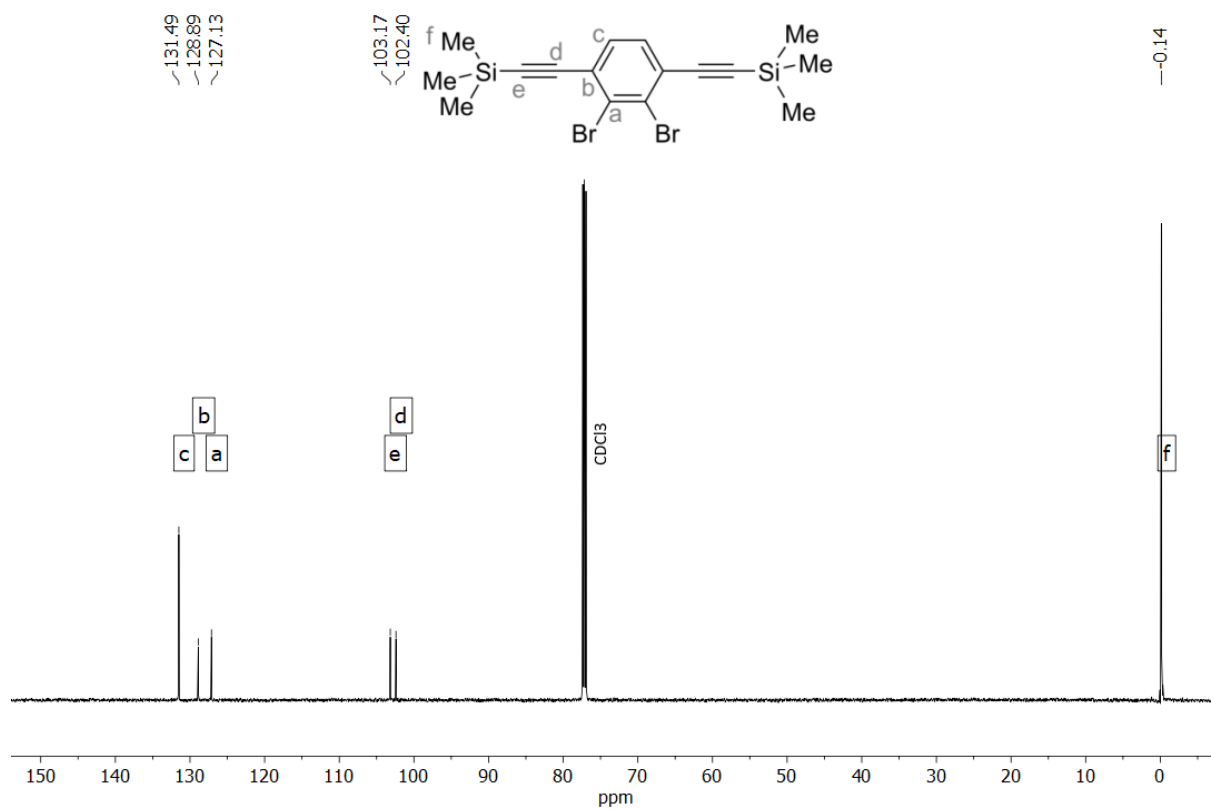

$^{29}\text{Si}\{^1\text{H}\}$  NMR (119 MHz,  $\text{CDCl}_3$ )

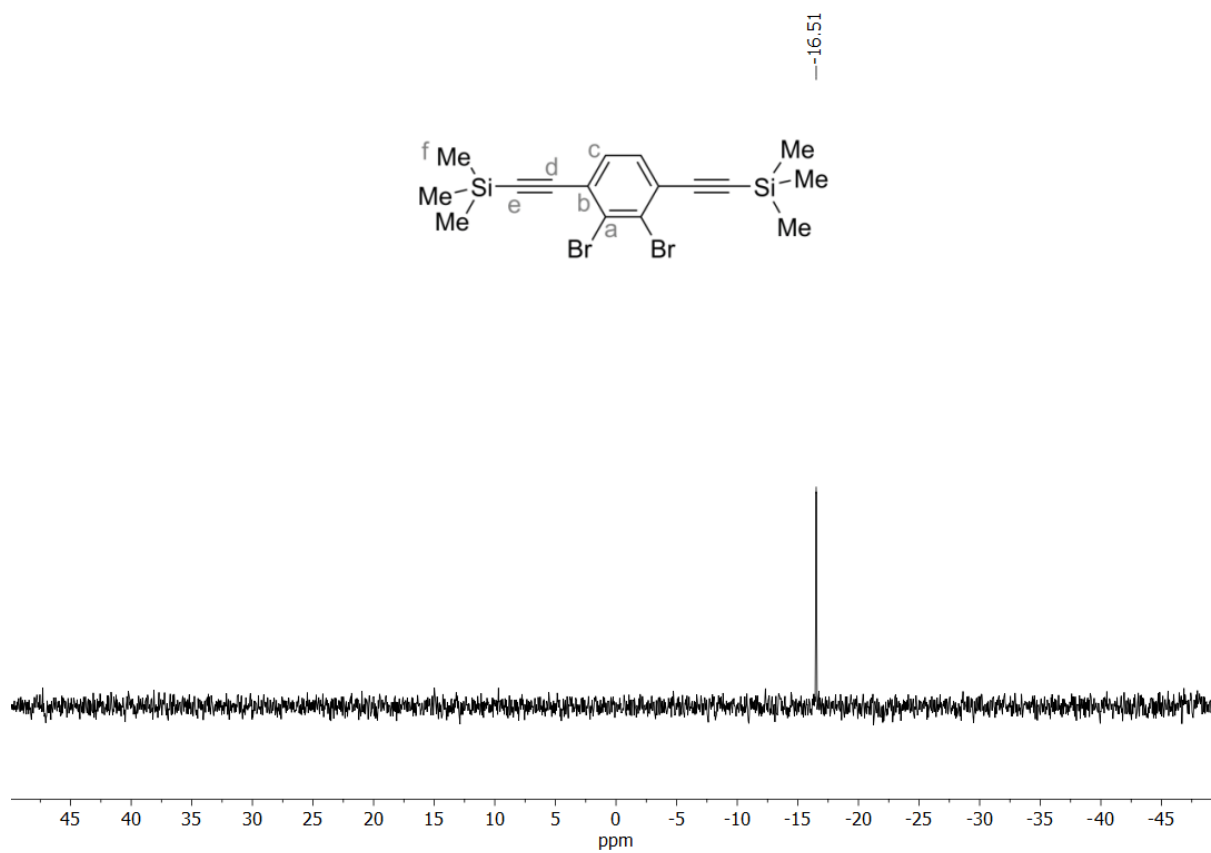

### 6.6. 1,2-bis(6-(1-Hydroxy-2-mesityl)-1,2-azaborinyl)-3,6-bis((trimethylsilyl)ethynyl)benzene (4)

$^1\text{H}$  NMR (601 MHz,  $\text{CDCl}_3$ )

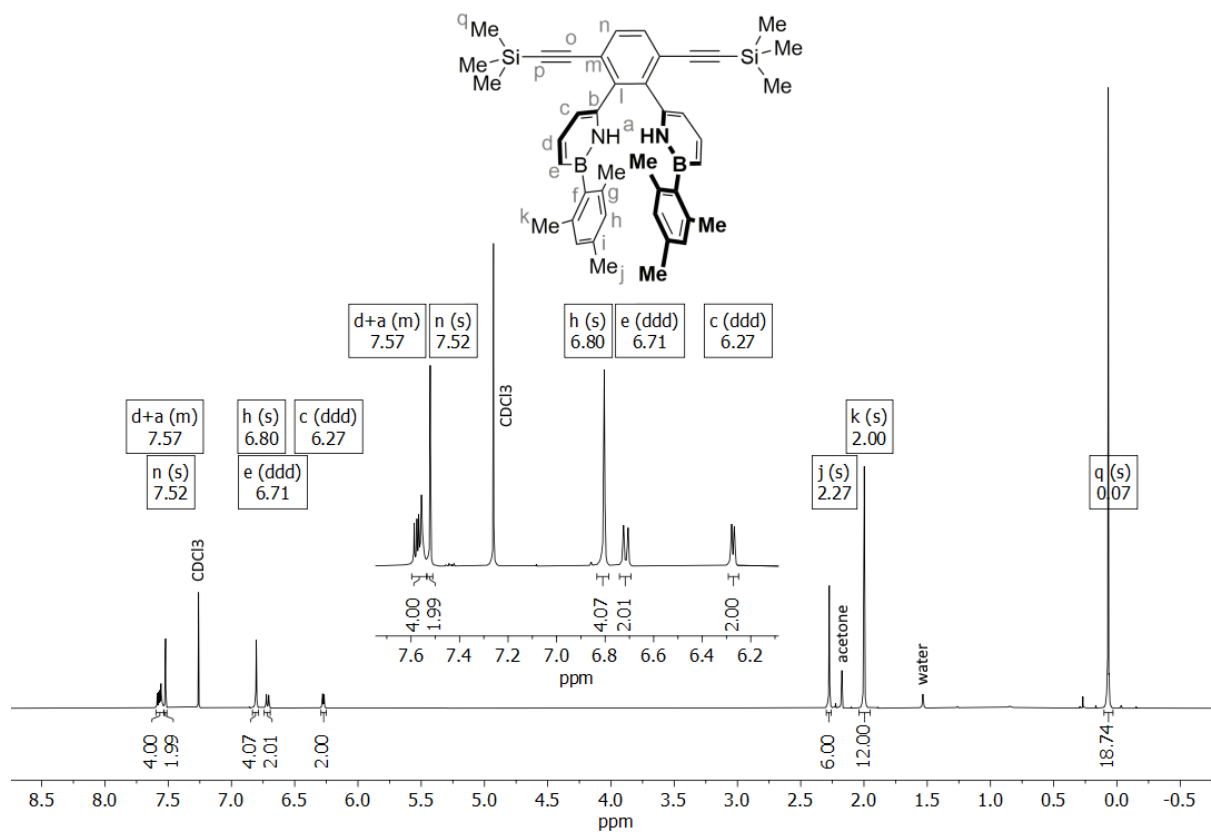

$^{13}\text{C}\{^1\text{H}\}$  NMR (151 MHz,  $\text{CDCl}_3$ )

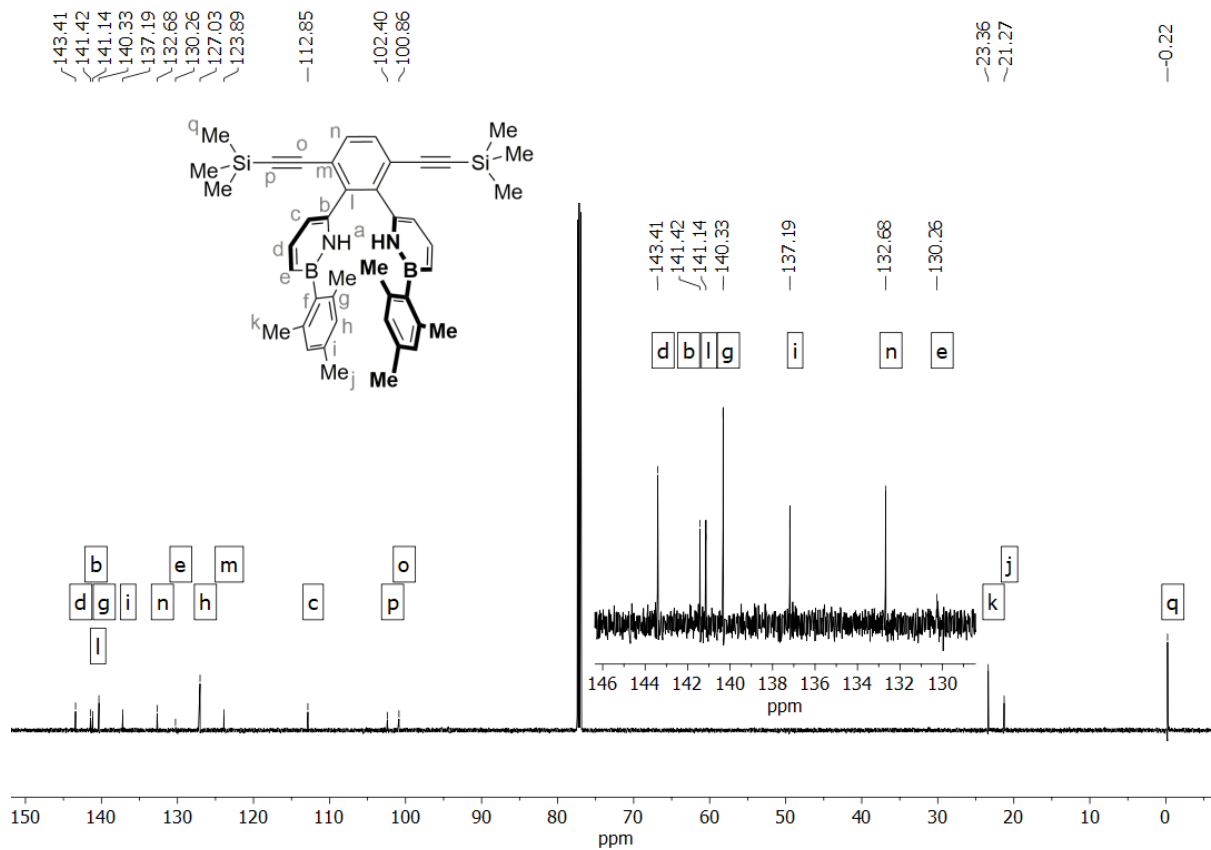

$^{11}\text{B}\{^1\text{H}\}$  NMR (193 MHz,  $\text{CDCl}_3$ )

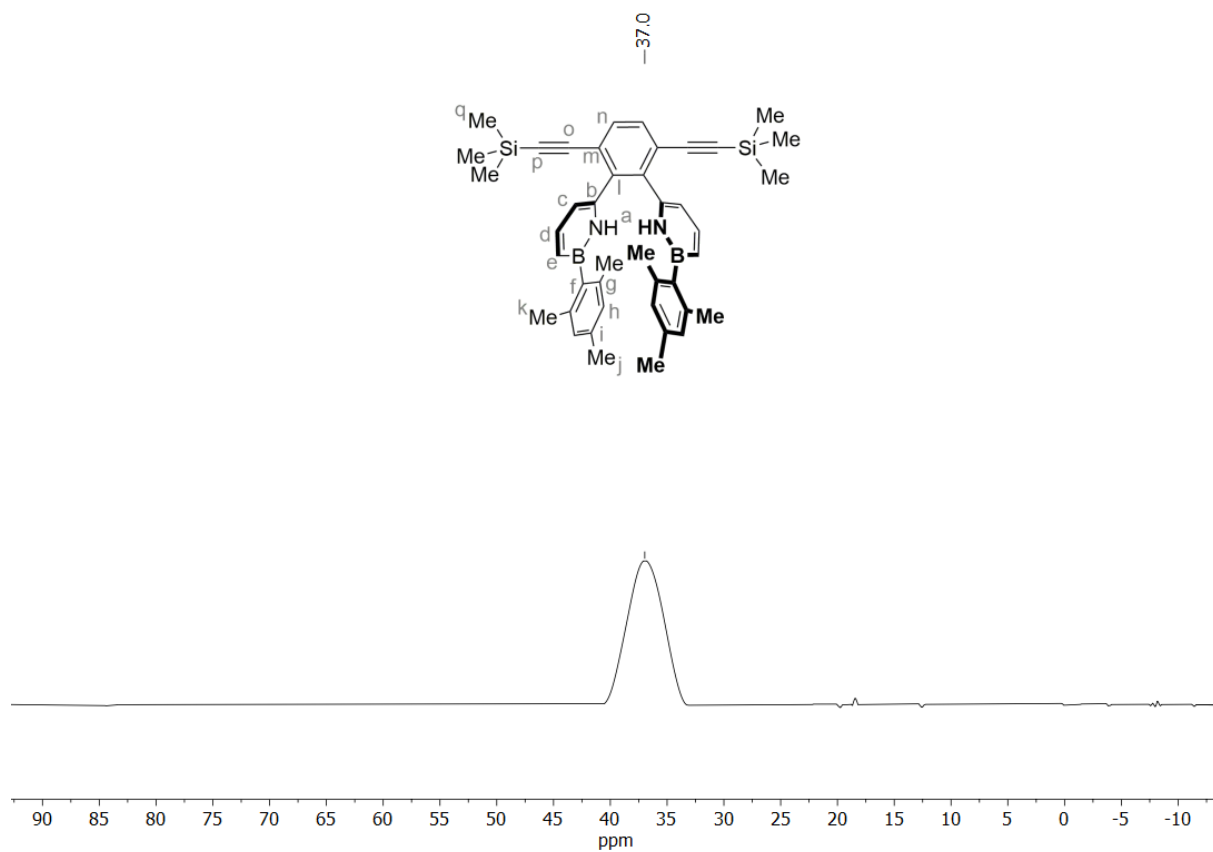

$^{29}\text{Si}\{^1\text{H}\}$  NMR (119 MHz,  $\text{CDCl}_3$ )

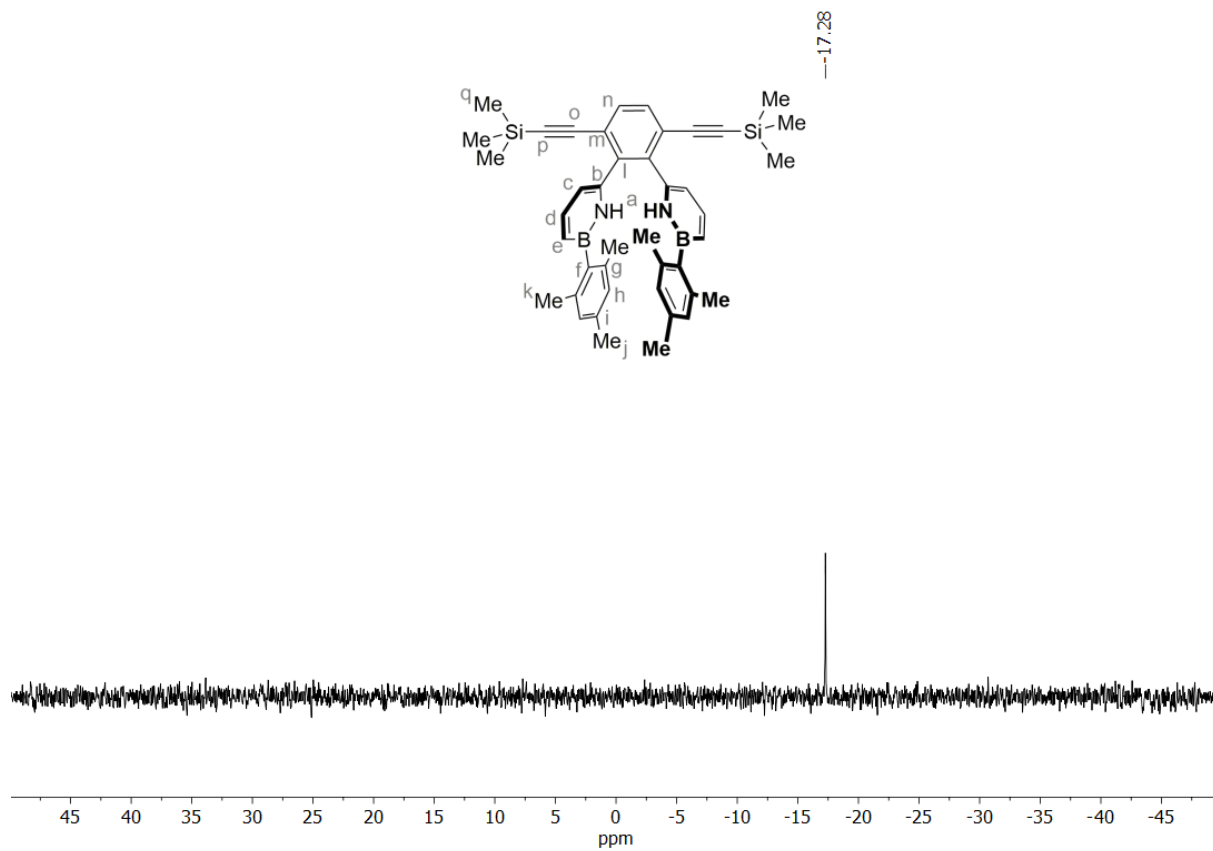

### 6.7. 1,14-Dihydro-2,13-dimesityl-1,14-diaza-2,13-diborapentahelicene (BN[5])

$^1\text{H}$  NMR (601 MHz,  $\text{CDCl}_3$ )

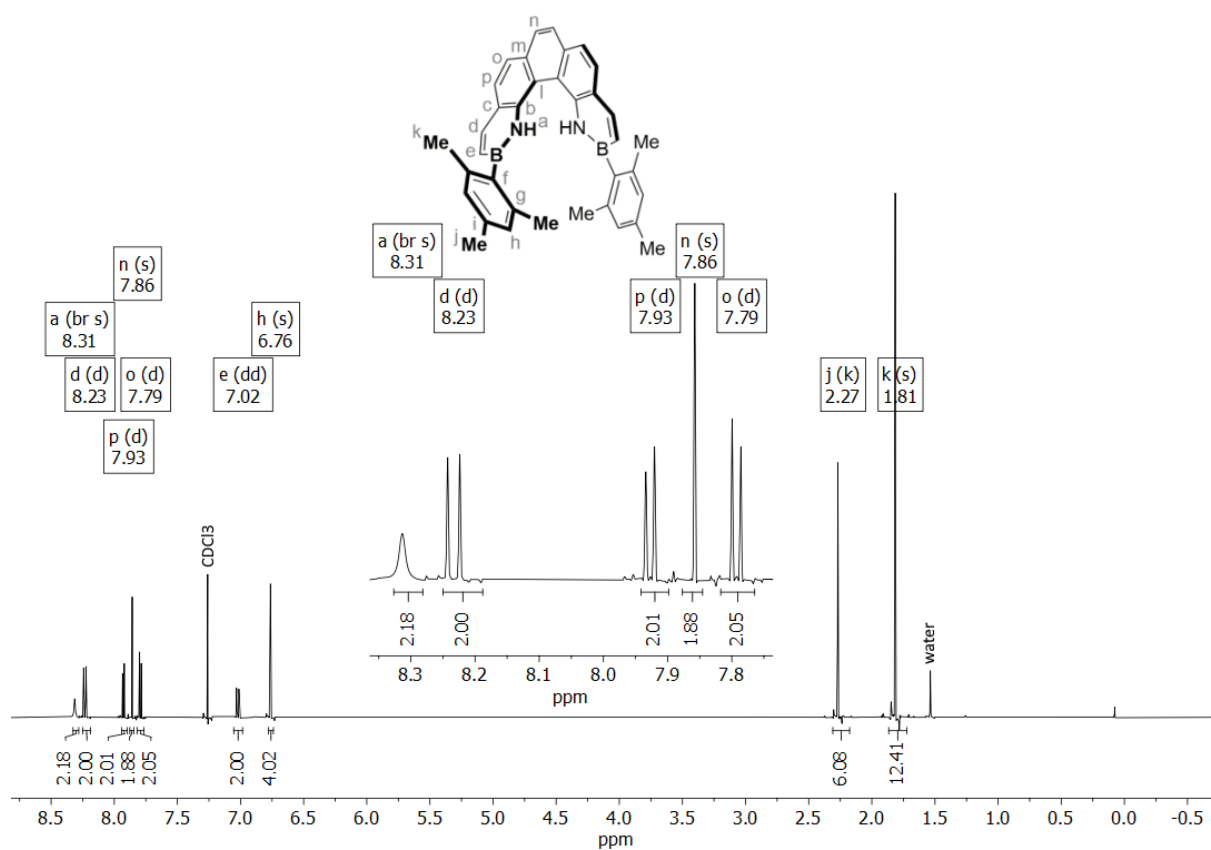

$^{13}\text{C}\{^1\text{H}\}$  NMR (151 MHz,  $\text{CDCl}_3$ )

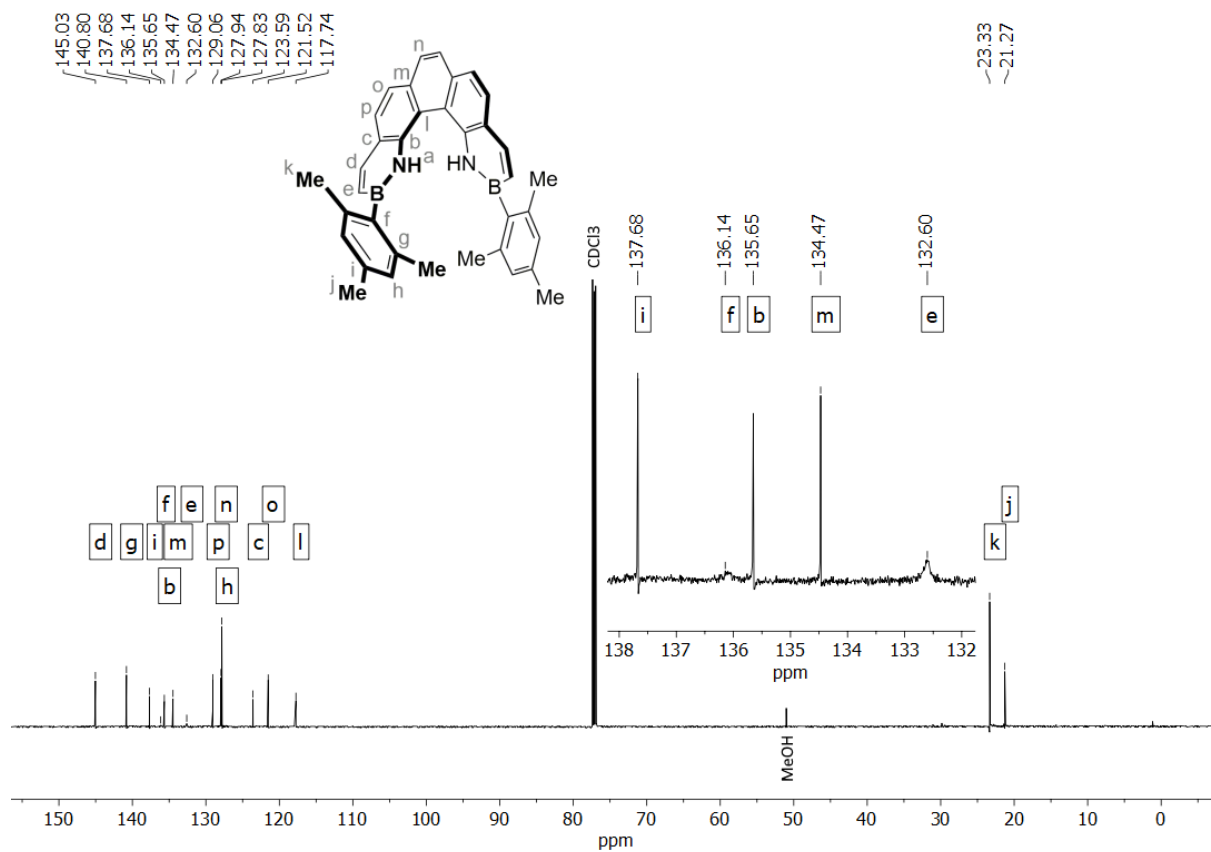

$^{11}\text{B}\{^1\text{H}\}$  NMR (193 MHz,  $\text{CDCl}_3$ )

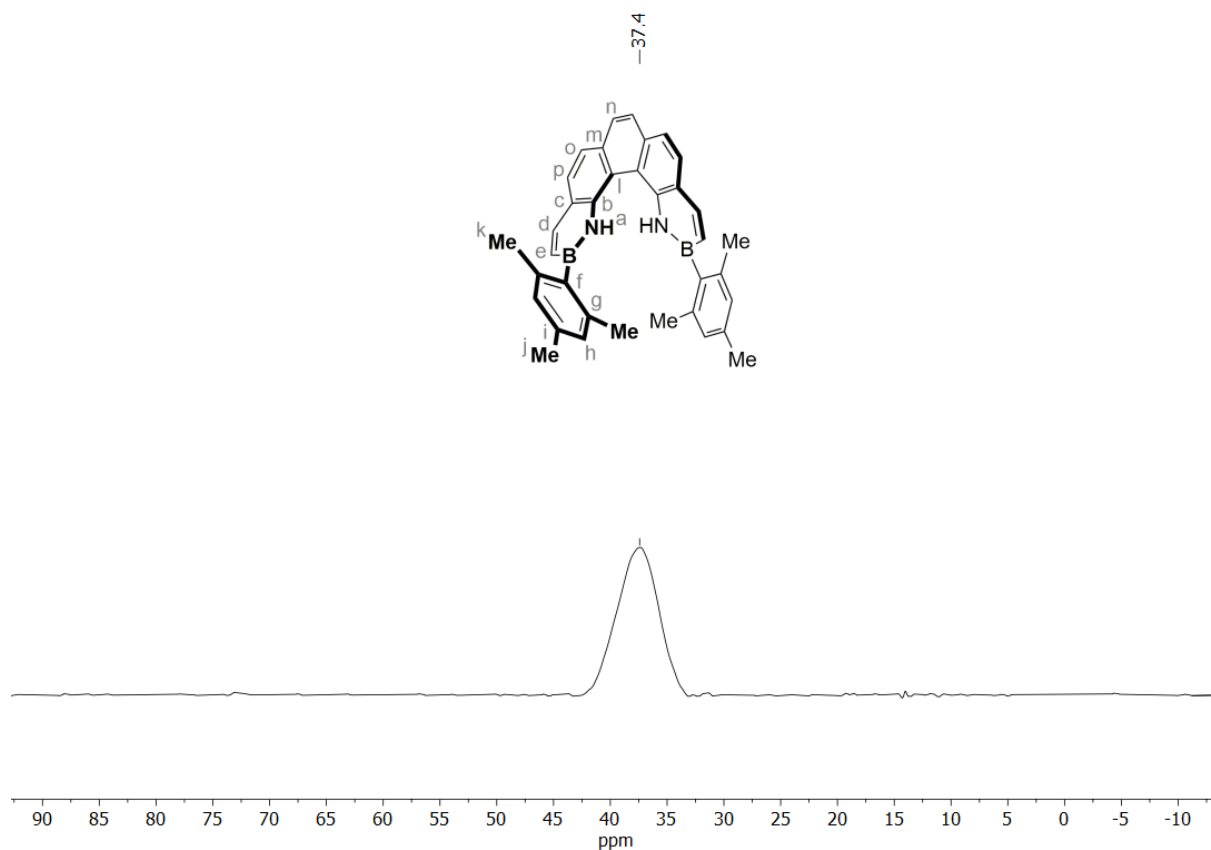

**6.8. 3,12-Dibromo-1,14-dihydro-2,13-dimesityl-1,14-diaza-2,13-diborapentahelicene (BN[5]-Br<sub>2</sub>)**

$^1\text{H}$  NMR (601 MHz,  $\text{CDCl}_3$ )

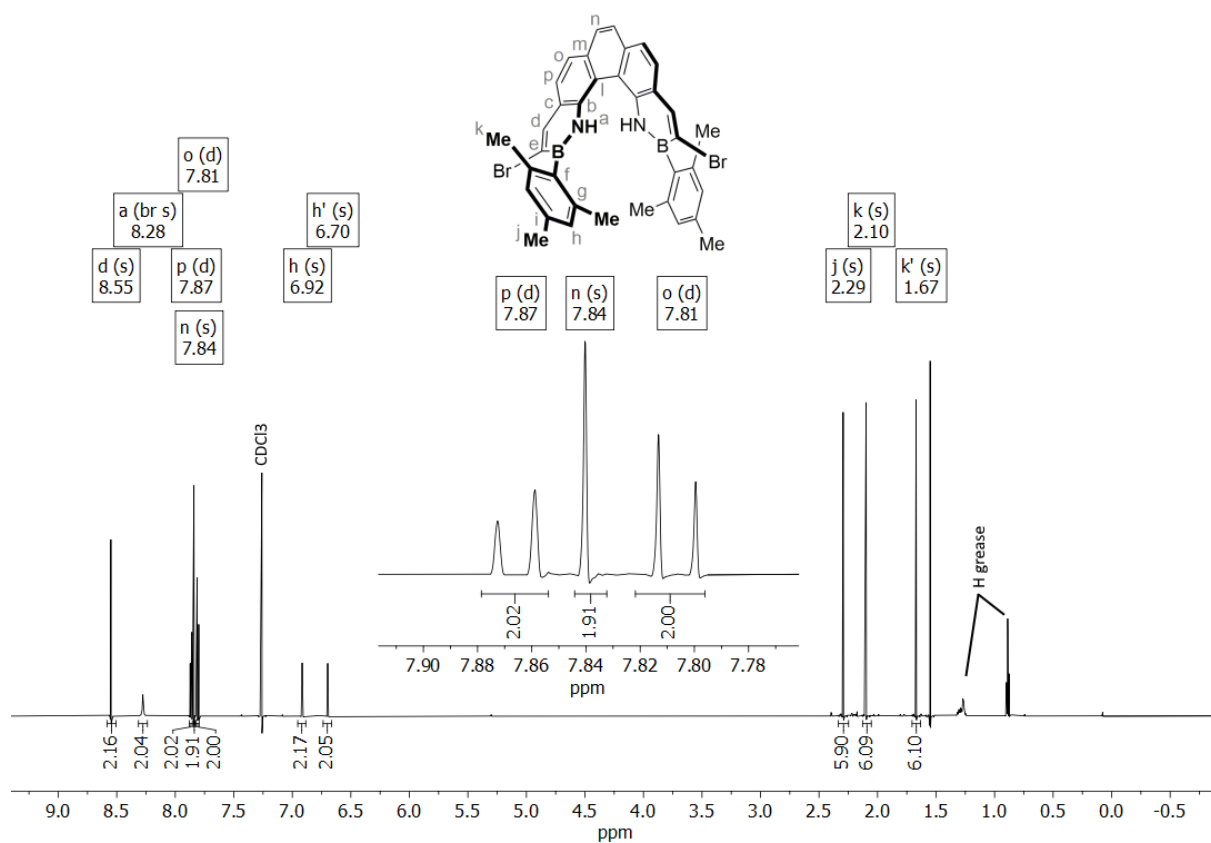

$^{13}\text{C}\{^1\text{H}\}$  NMR (151 MHz,  $\text{CDCl}_3$ )

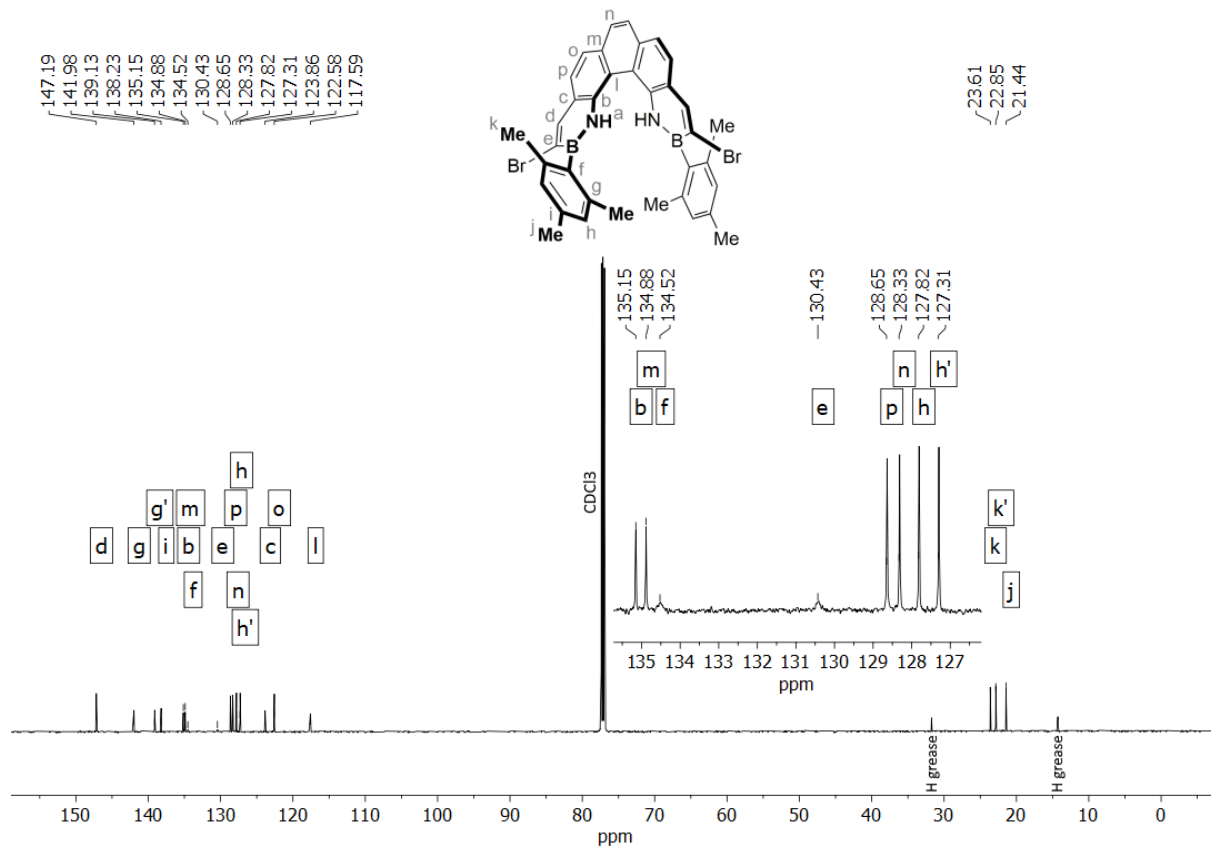

$^{11}\text{B}\{^1\text{H}\}$  NMR (193 MHz,  $\text{CDCl}_3$ )

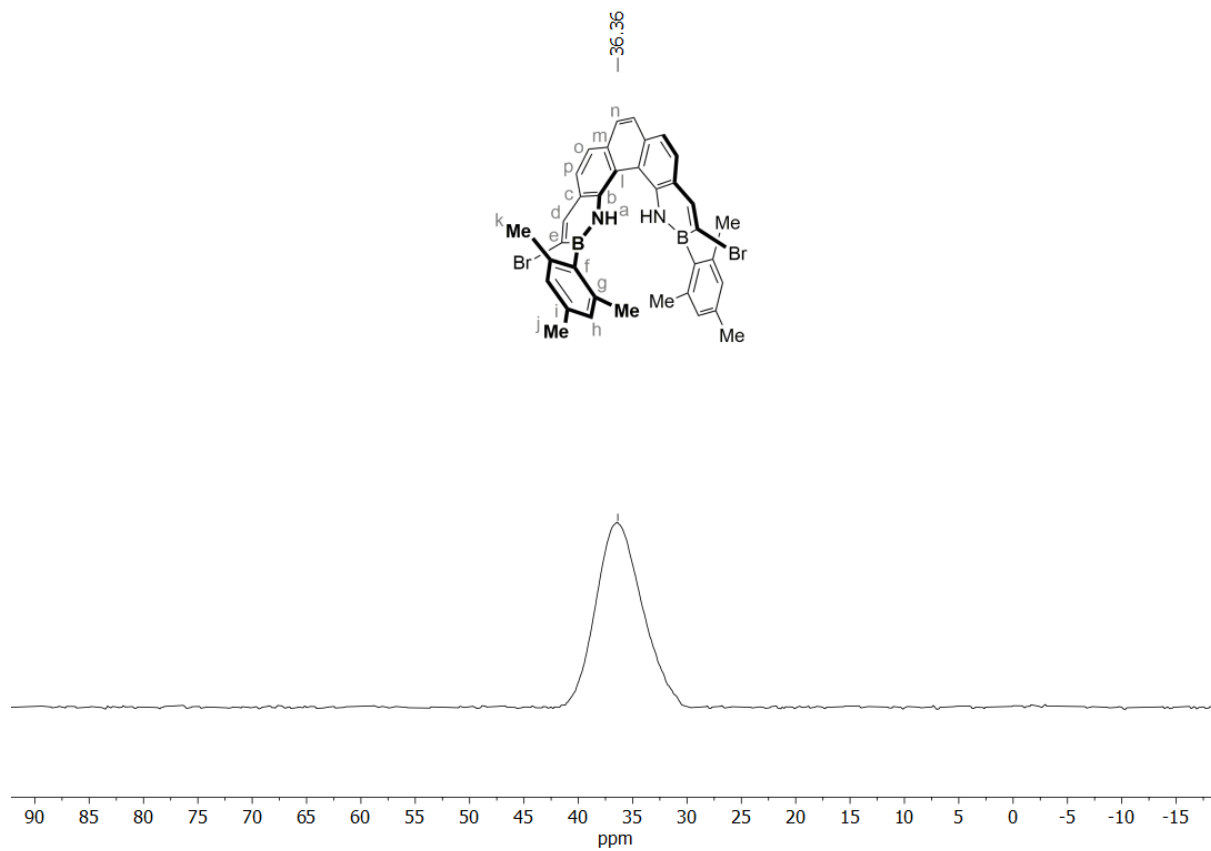

### 6.9. 3,12-Dicyano-1,14-dihydro-2,13-dimesityl-1,14-diaza-2,13-diborapentahelicene (BN[5]-(CN)<sub>2</sub>)

<sup>1</sup>H NMR (601 MHz, CDCl<sub>3</sub>)

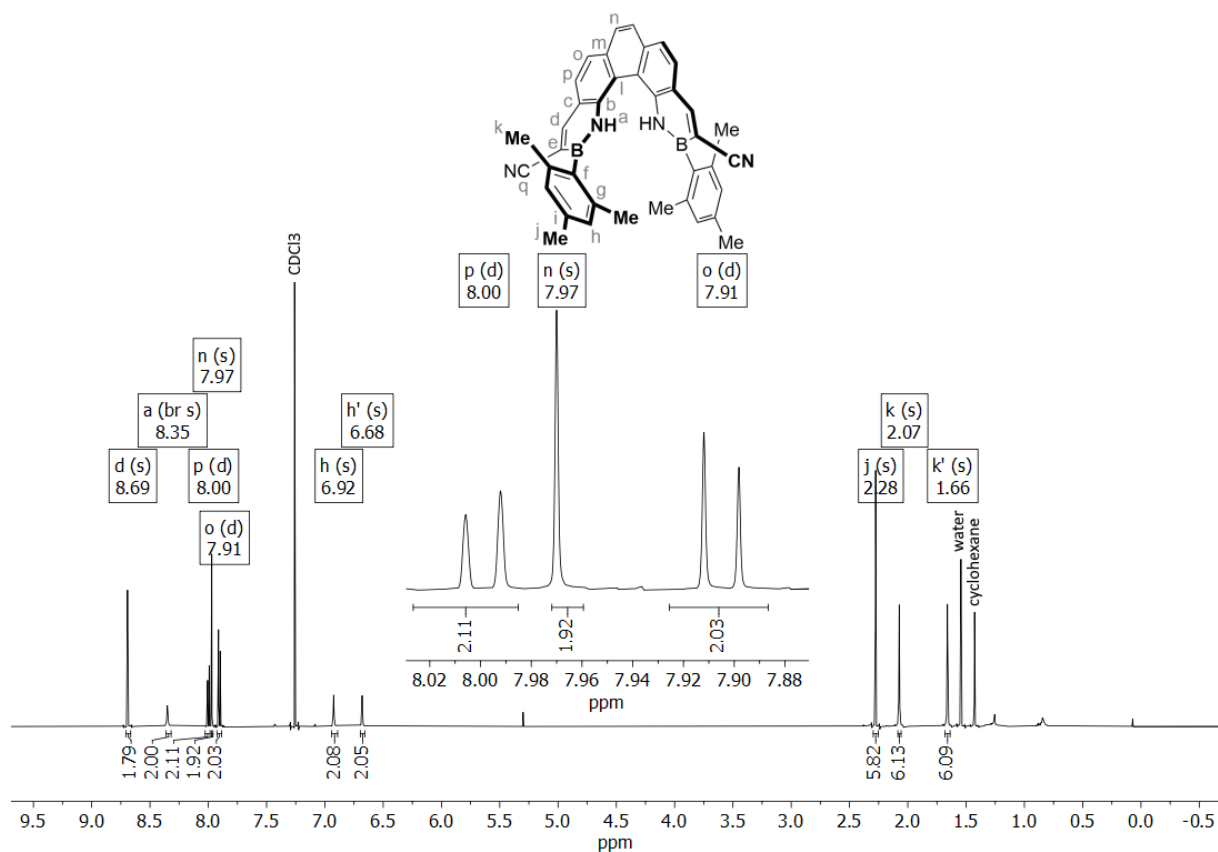

<sup>13</sup>C{<sup>1</sup>H} NMR (151 MHz, CDCl<sub>3</sub>)

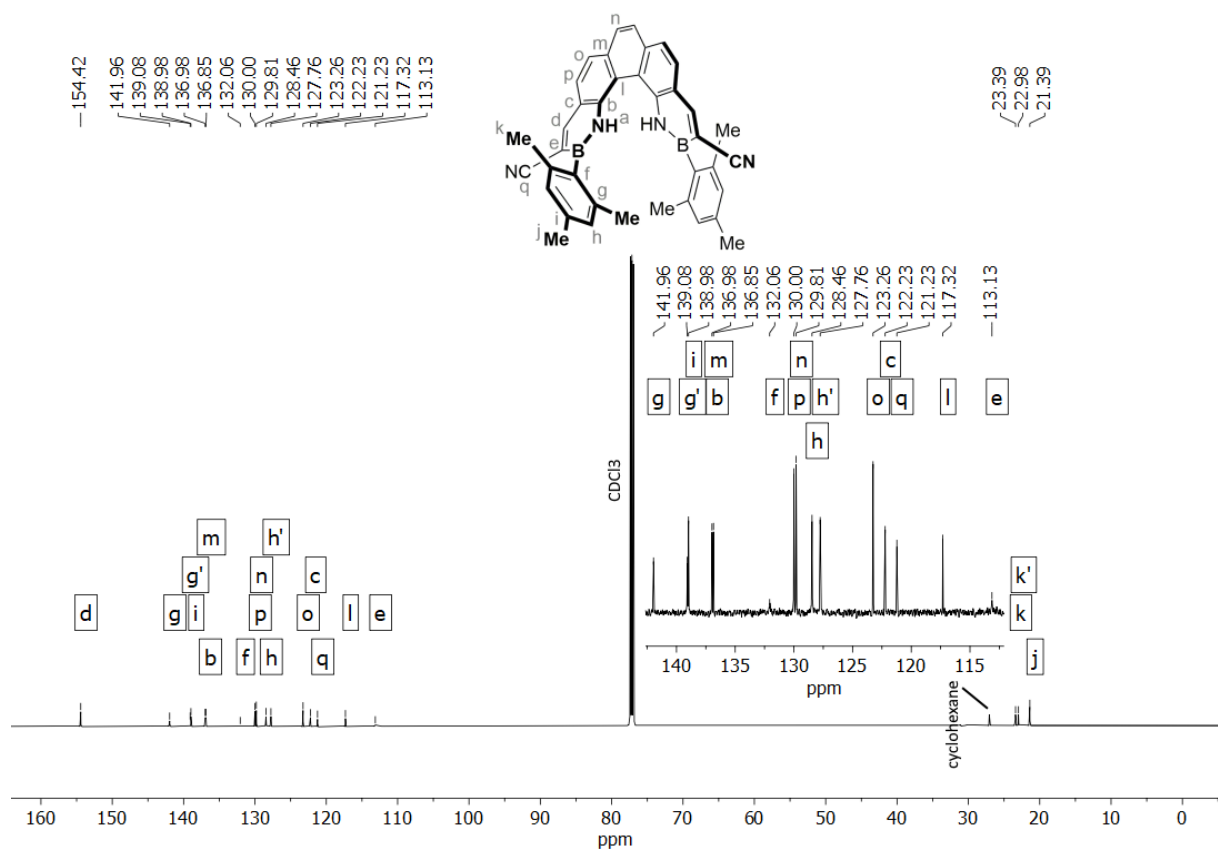



$^{11}\text{B}\{^1\text{H}\}$  NMR (193 MHz,  $\text{CDCl}_3$ )

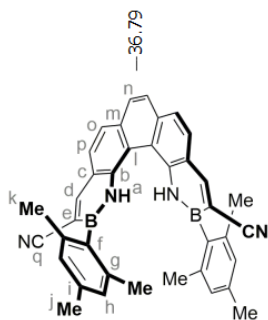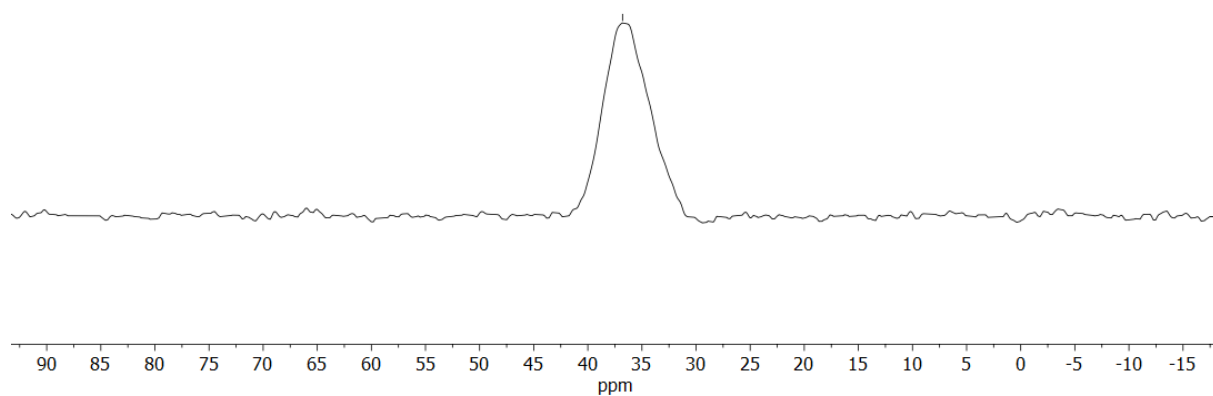

### 6.10. 1,8-Dibromo-2,7-bis(trifluoromethylsulfonyl)naphthalene (17)

$^1\text{H}$  NMR (601 MHz,  $\text{CDCl}_3$ )

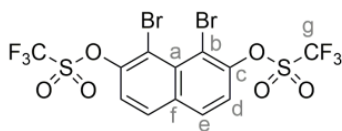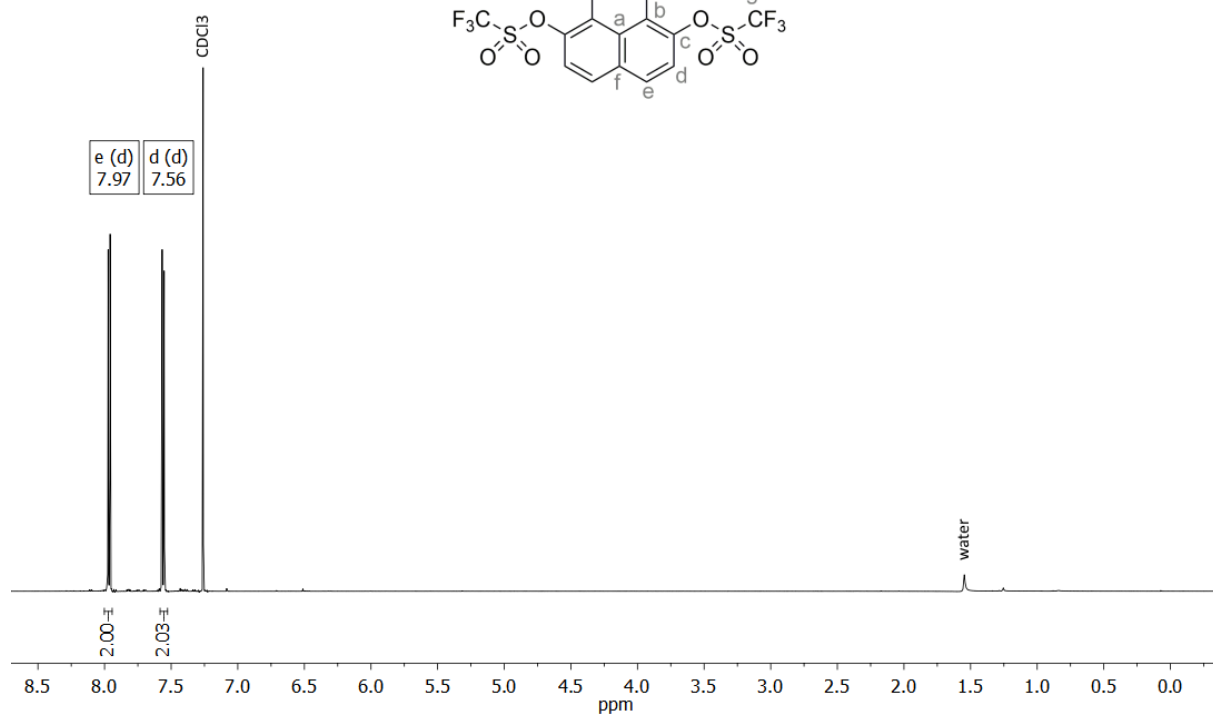

$^{13}\text{C}\{^1\text{H}\}$  NMR (151 MHz,  $\text{CDCl}_3$ )

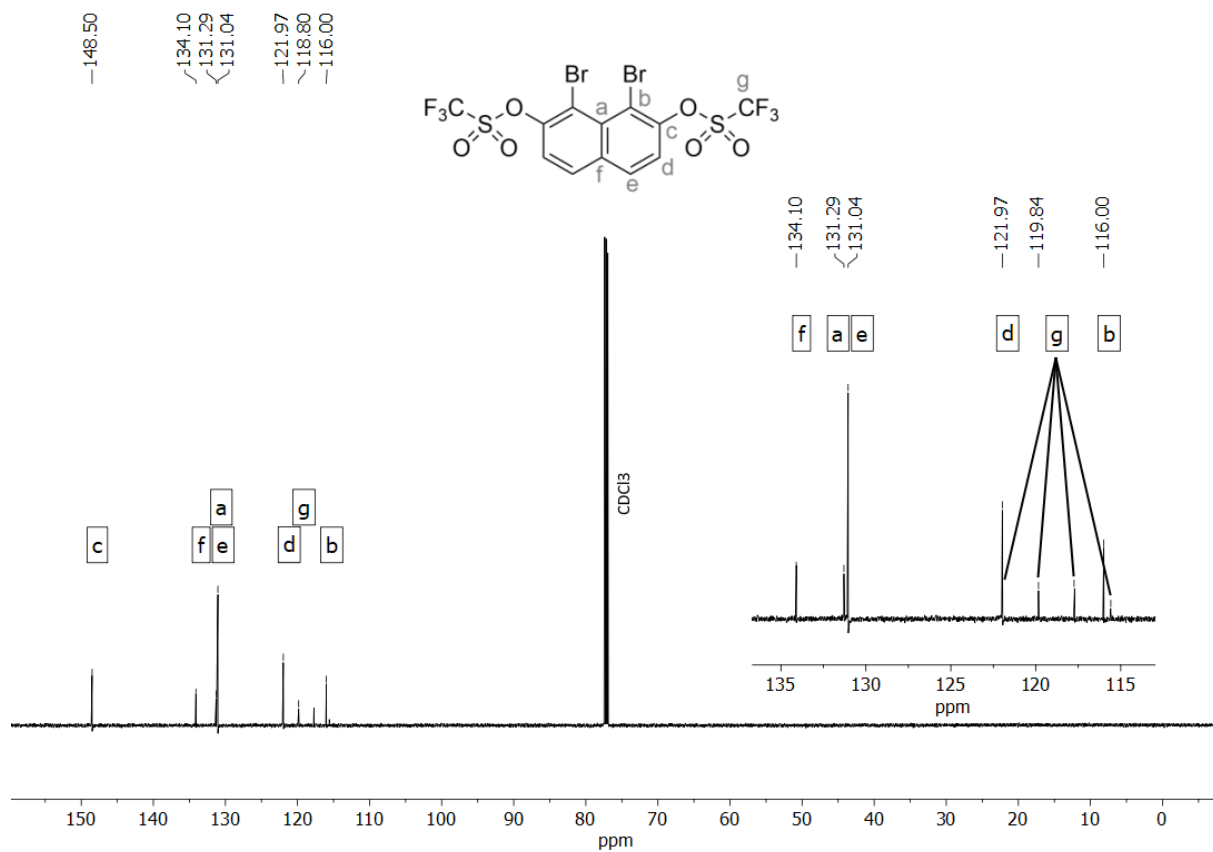

$^{19}\text{F}$  NMR (565 MHz,  $\text{CDCl}_3$ )

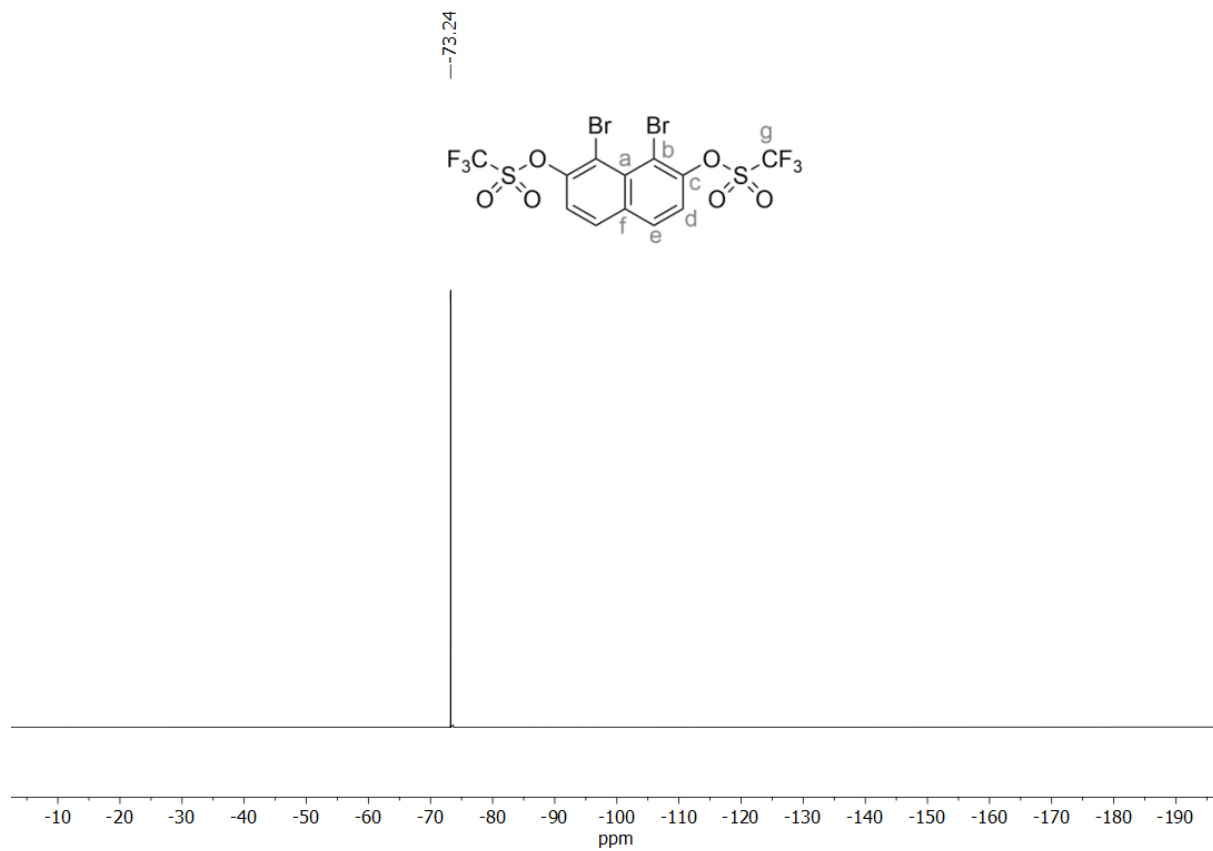

### 6.11. 1,8-Dibromo-2,7-bis(trimethylsilylethynyl)naphthalene (2)

$^1\text{H}$  NMR (601 MHz,  $\text{CDCl}_3$ )

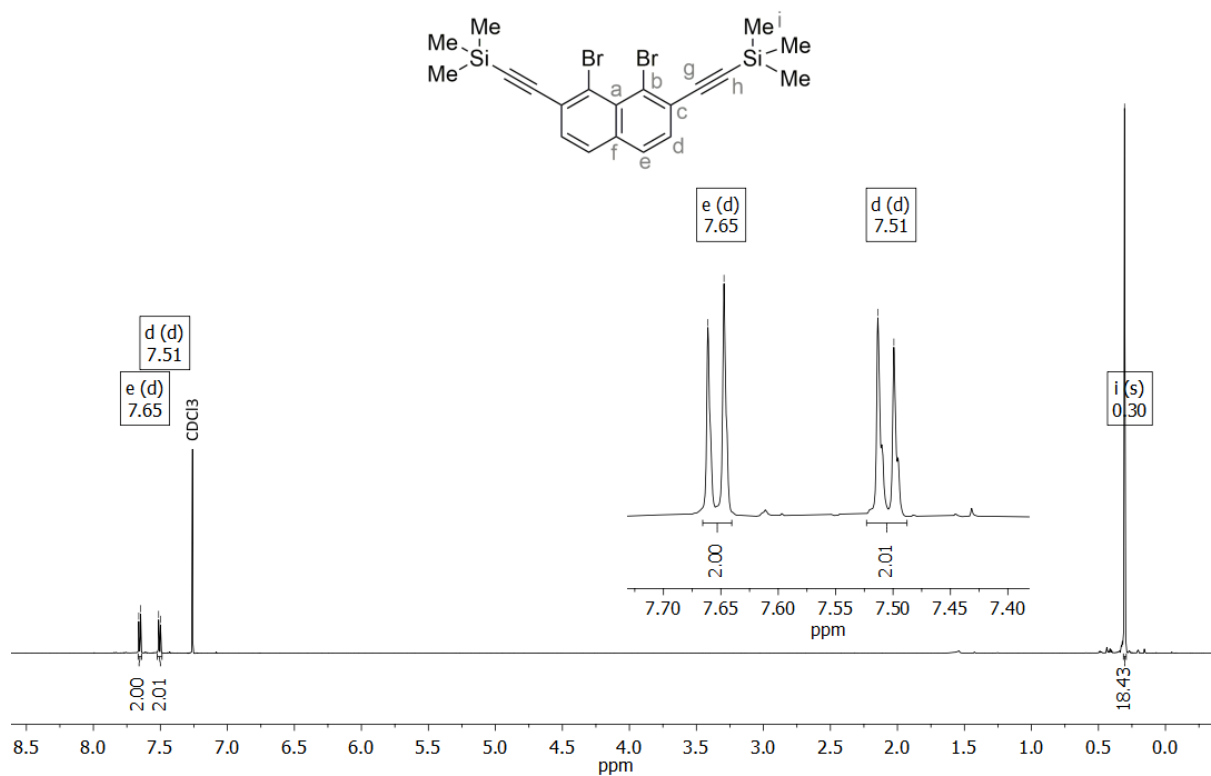

$^{13}\text{C}\{^1\text{H}\}$  NMR (151 MHz,  $\text{CDCl}_3$ )

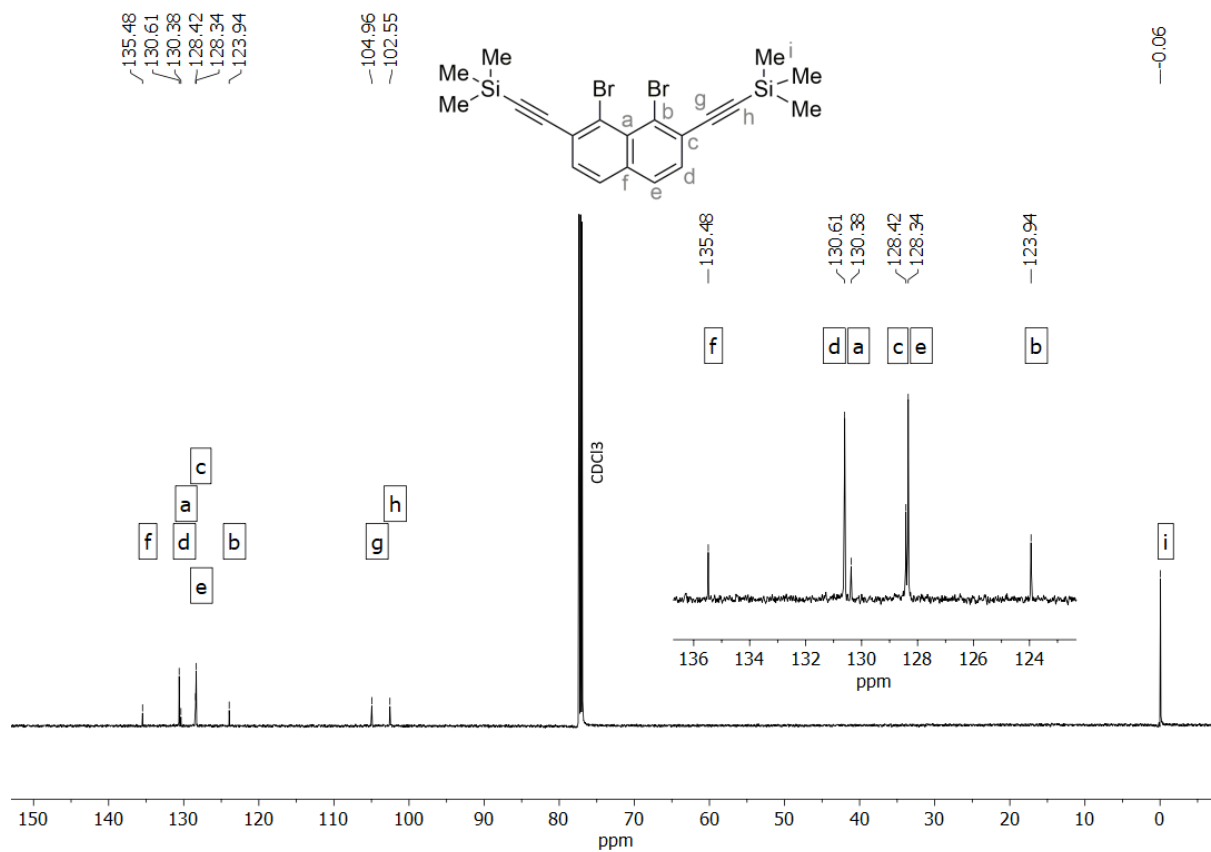

$^{29}\text{Si}\{^1\text{H}\}$  NMR (119 MHz,  $\text{CDCl}_3$ )

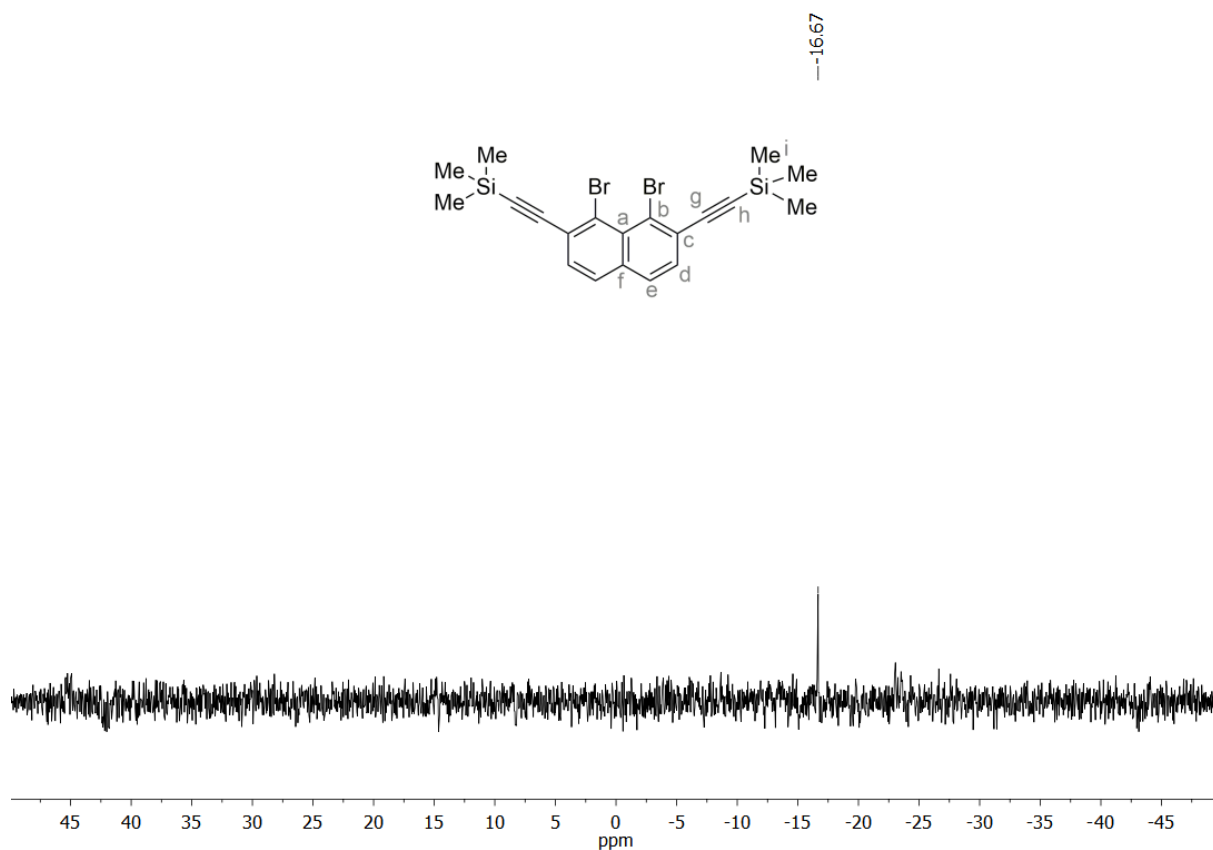

### 6.12. 1,8-bis(6-(1-Hydro-2-mesityl)-1,2-azaborinyl)-2,7-bis(trimethylsilyl)ethynyl)naphthalene (5)

$^1\text{H}$  NMR (601 MHz,  $\text{CDCl}_3$ )

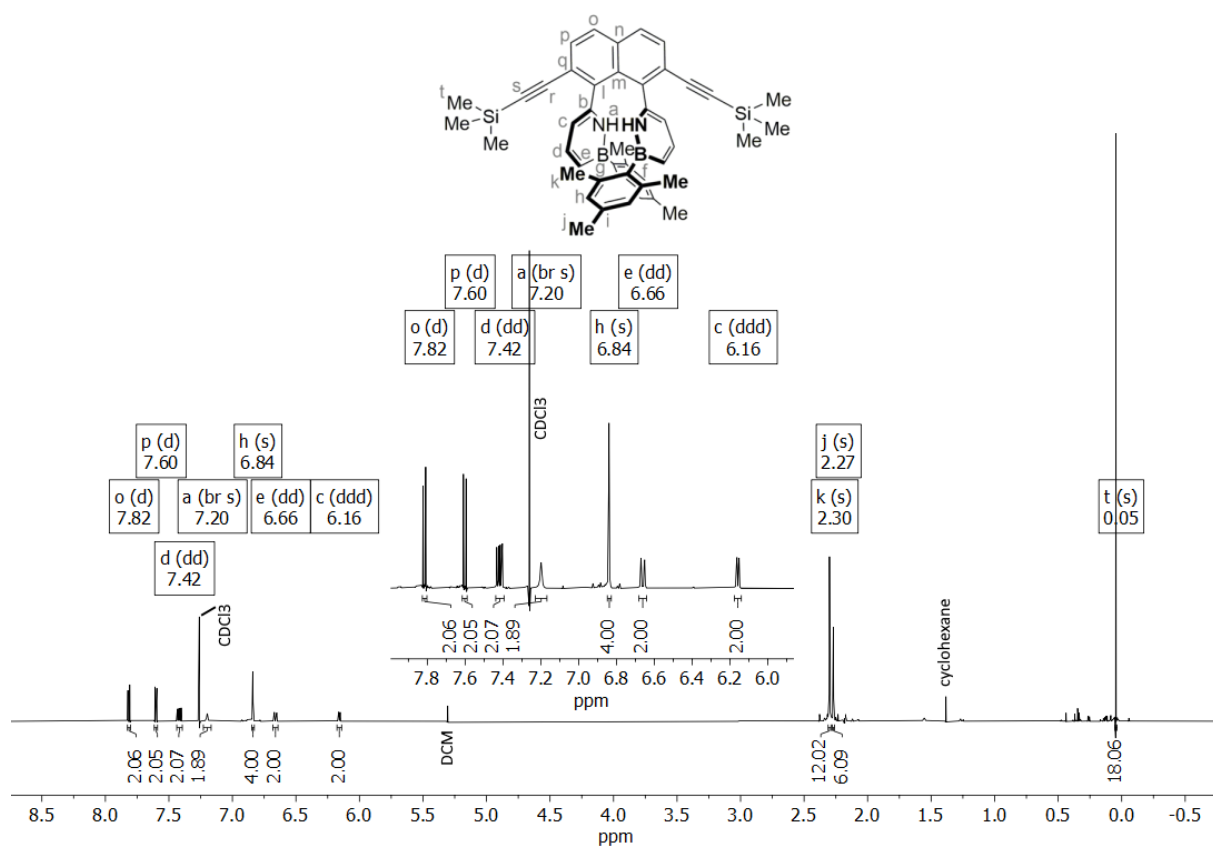

$^{13}\text{C}\{^1\text{H}\}$  NMR (151 MHz,  $\text{CDCl}_3$ )

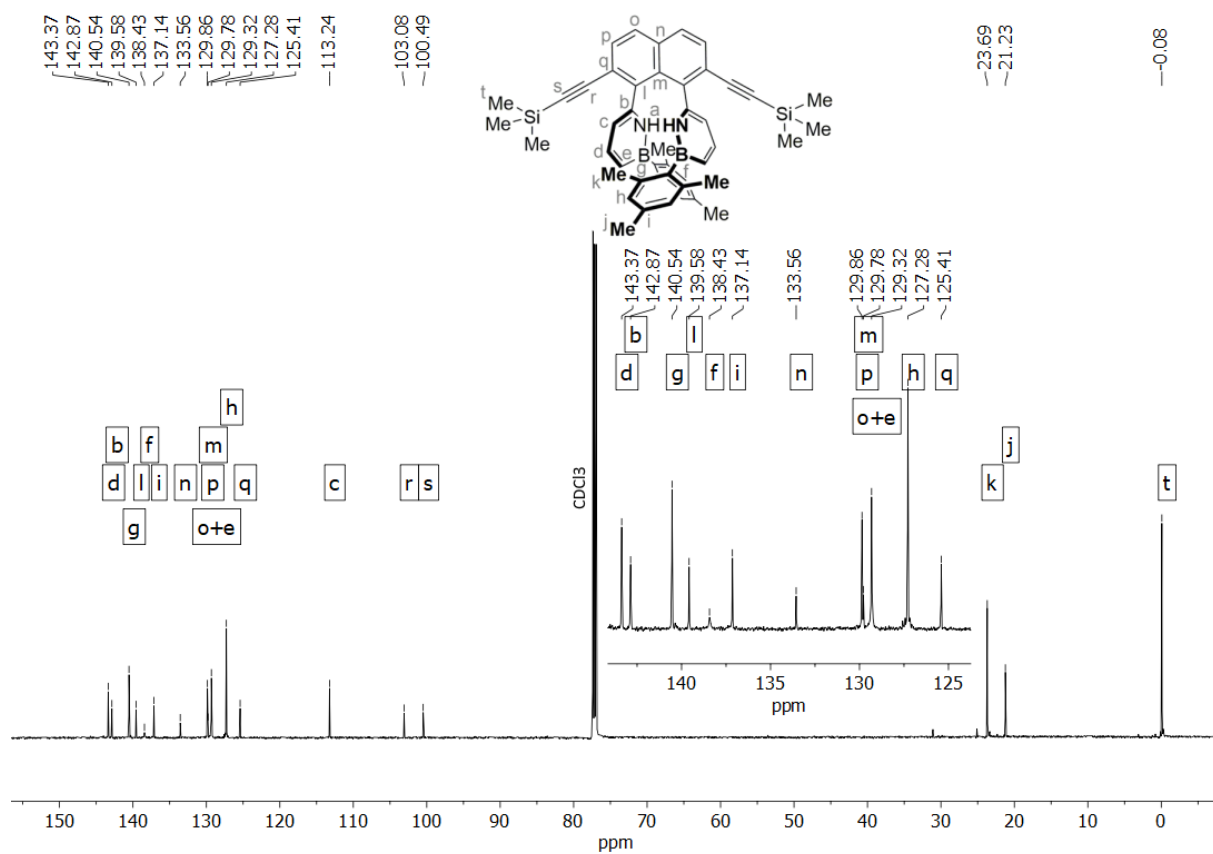

$^{11}\text{B}\{^1\text{H}\}$  NMR (193 MHz,  $\text{CDCl}_3$ )

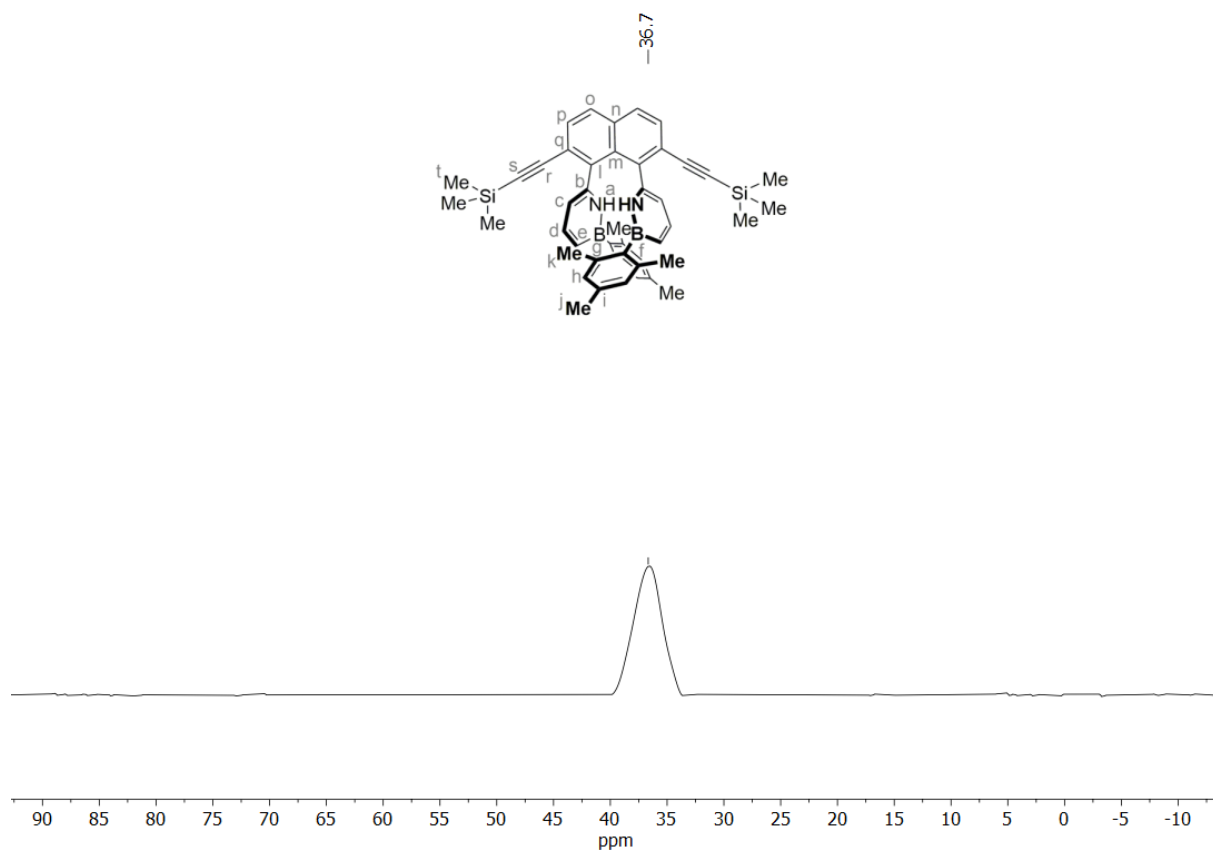

$^{29}\text{Si}\{^1\text{H}\}$  NMR (119 MHz,  $\text{CDCl}_3$ )

—17.65

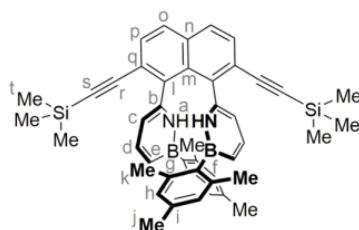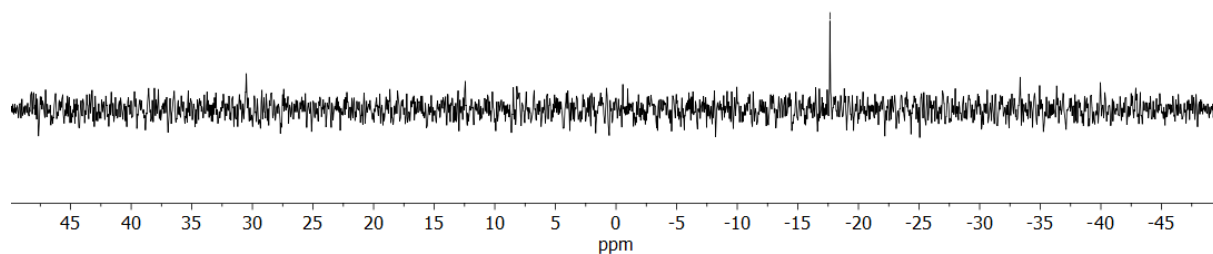

### 6.13. 1,16-Dihydro-2,15-dimesityl-1,16-diaza-2,15-diborahexahelicene (BN[6])

$^1\text{H}$  NMR (601 MHz,  $\text{CDCl}_3$ )

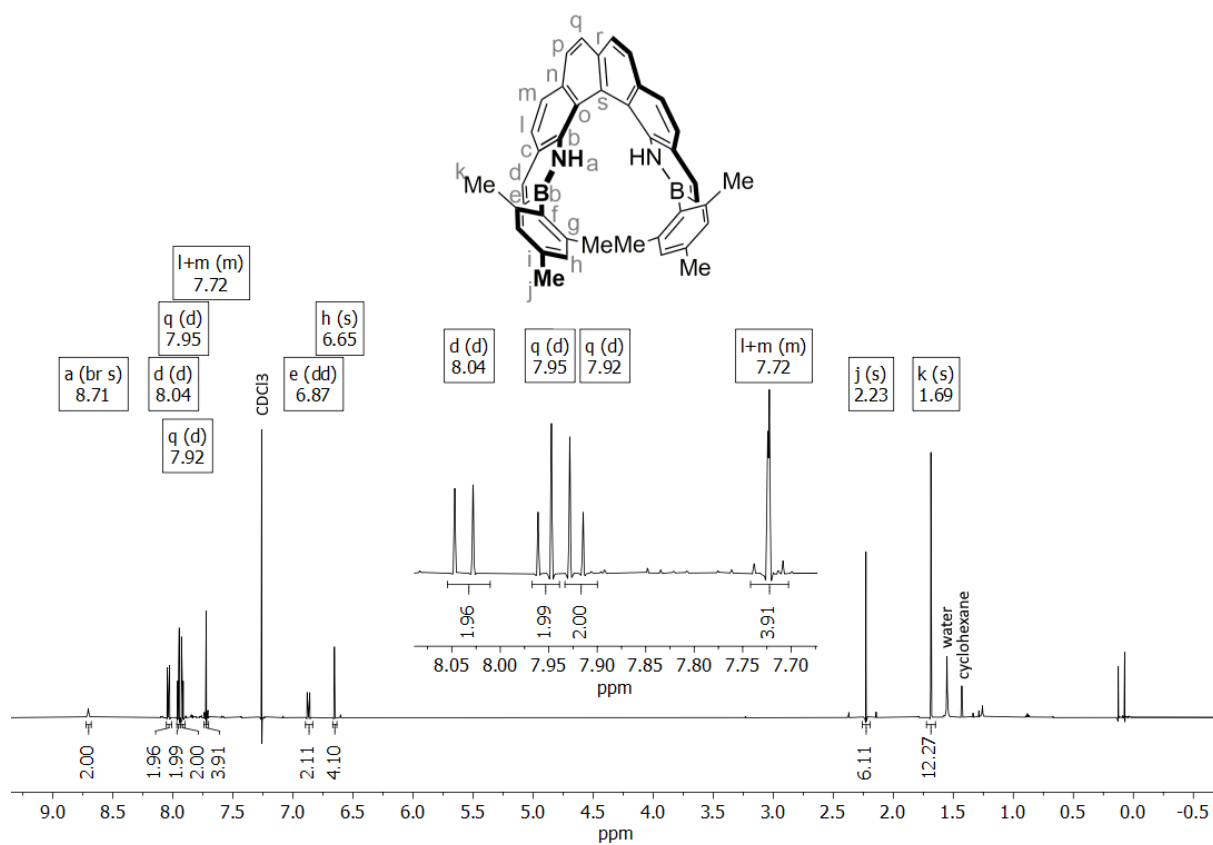

$^{13}\text{C}\{^1\text{H}\}$  NMR (151 MHz,  $\text{CDCl}_3$ )

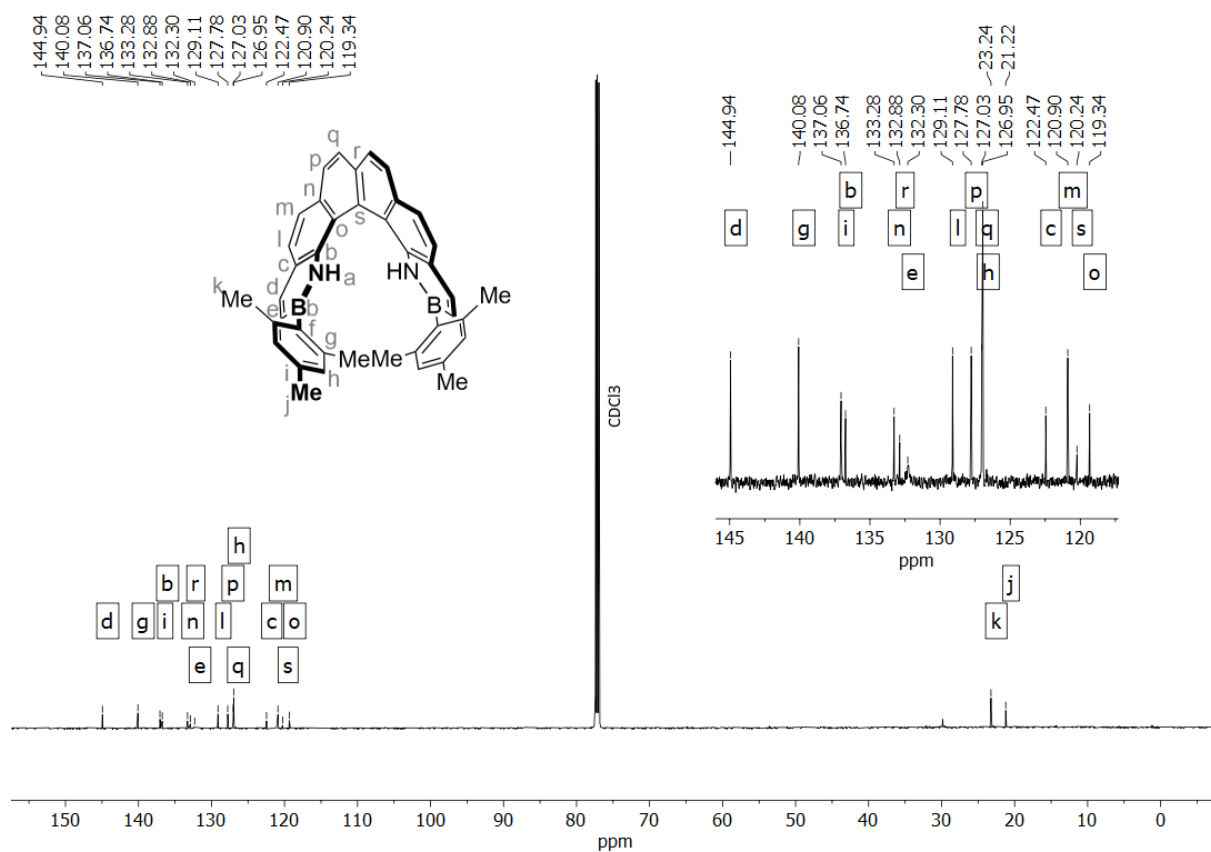

$^1\text{H}\{^1\text{H}\}$  NMR (193 MHz,  $\text{CDCl}_3$ )

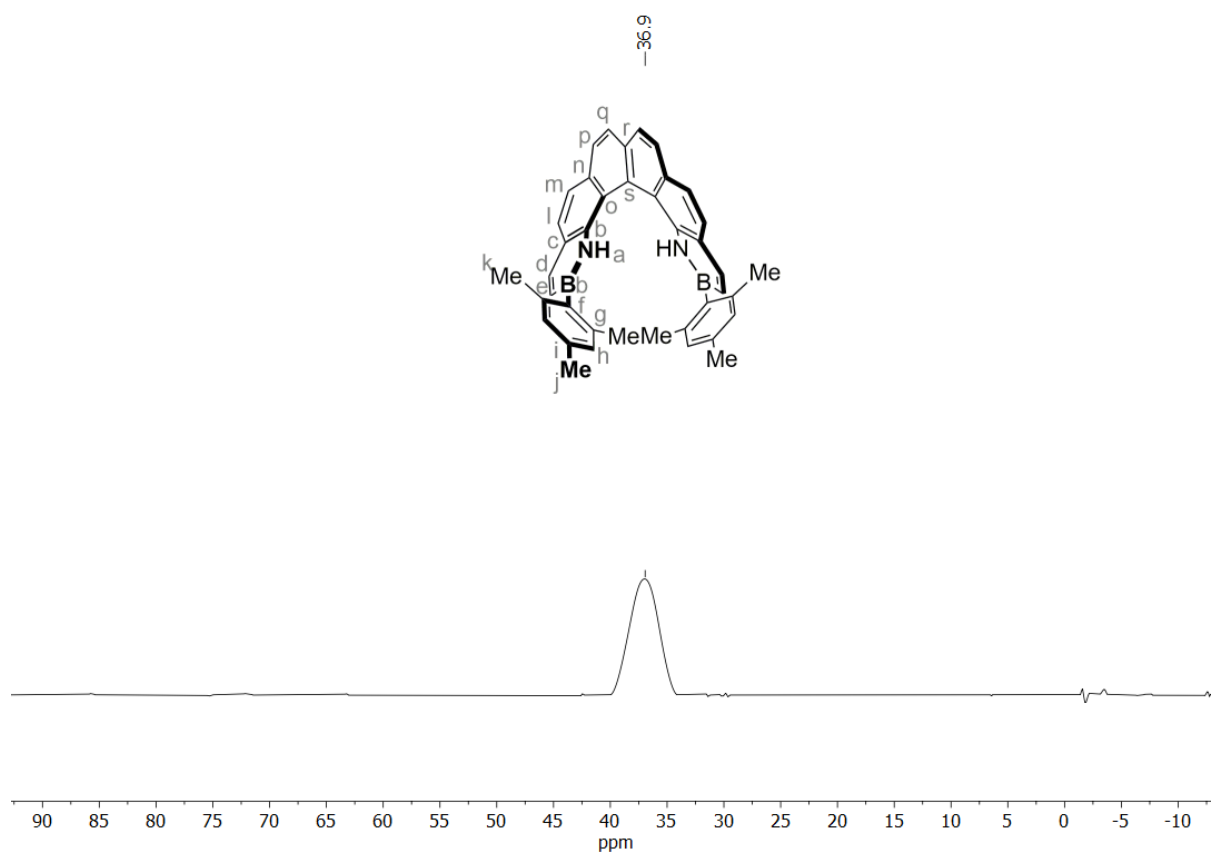

### 6.14. (Z)-4-Bromo-4'-formylstilbene (18)

<sup>1</sup>H NMR (601 MHz, CDCl<sub>3</sub>)

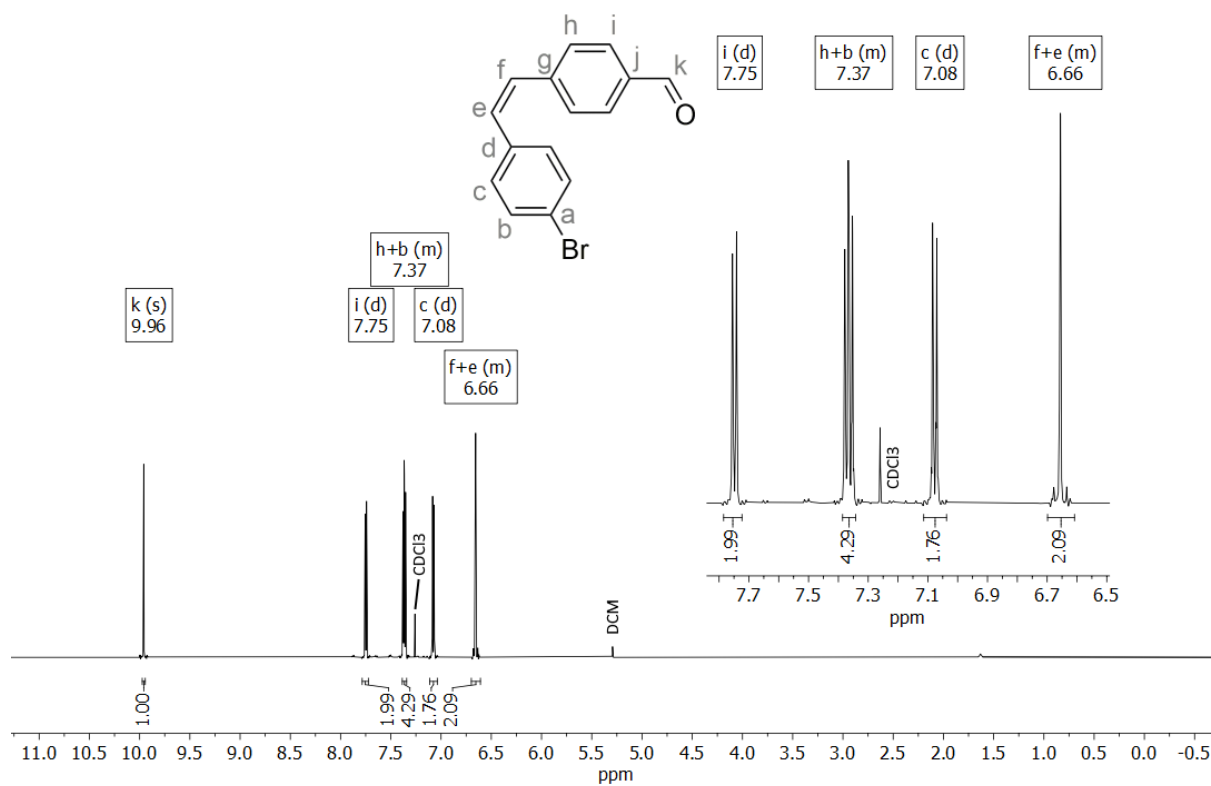

<sup>13</sup>C{<sup>1</sup>H} NMR (151 MHz, CDCl<sub>3</sub>)

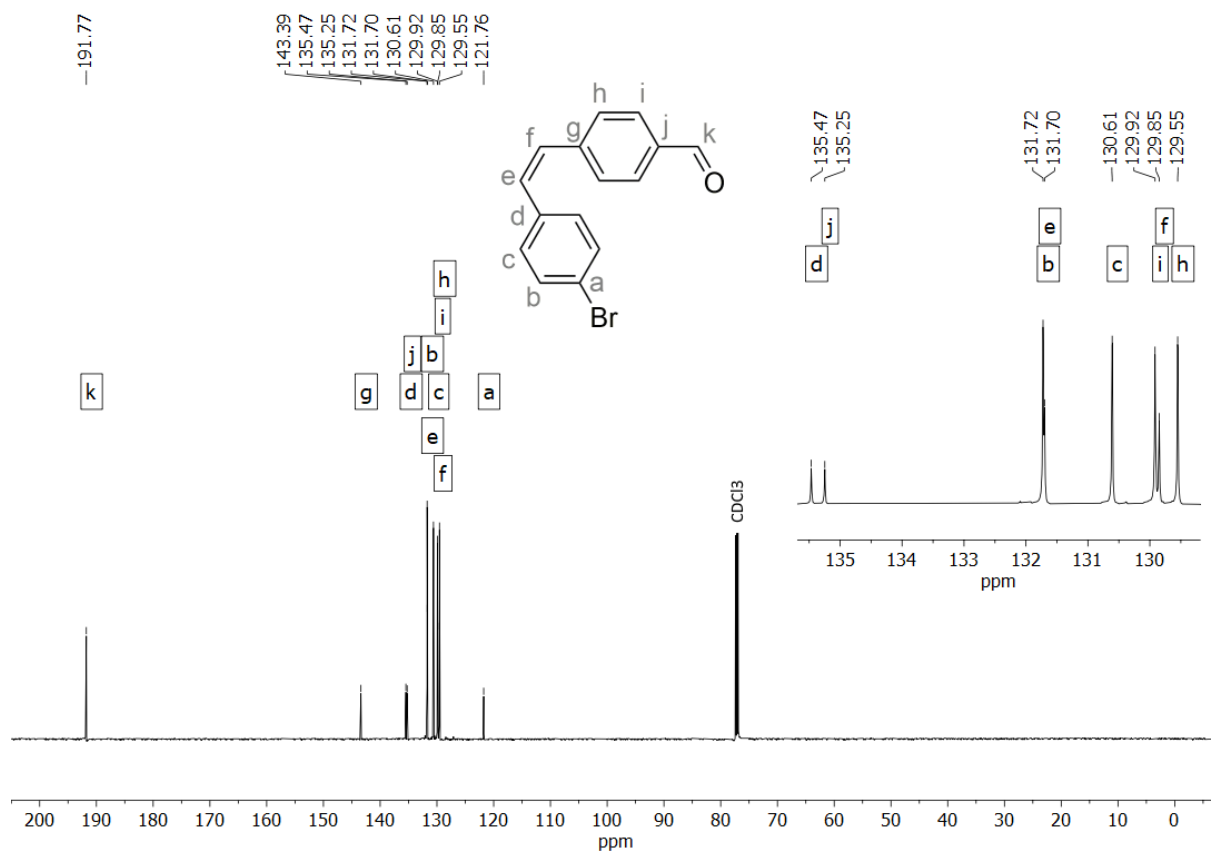



### 6.15. 6-Bromo-3-formylphenanthrene (19)

$^1\text{H}$  NMR (601 MHz,  $\text{CDCl}_3$ )

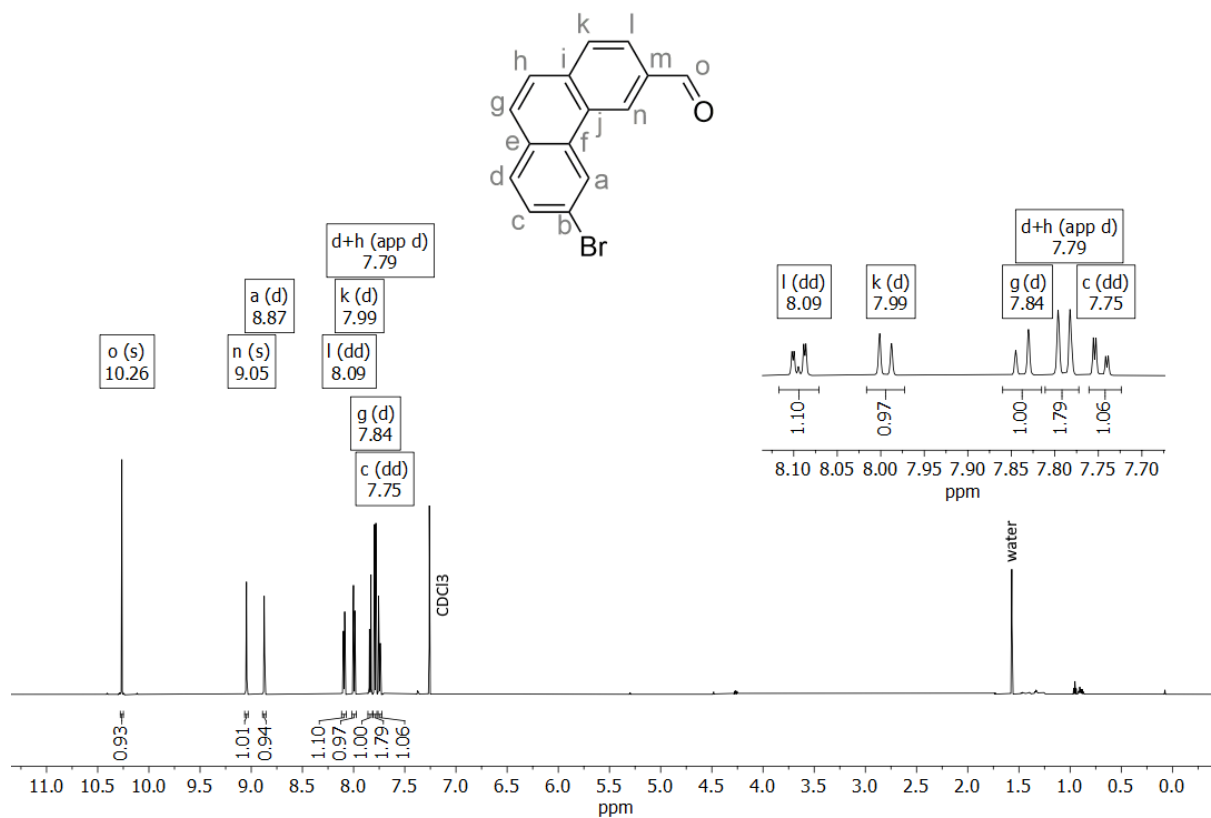

$^{13}\text{C}\{^1\text{H}\}$  NMR (151 MHz,  $\text{CDCl}_3$ )

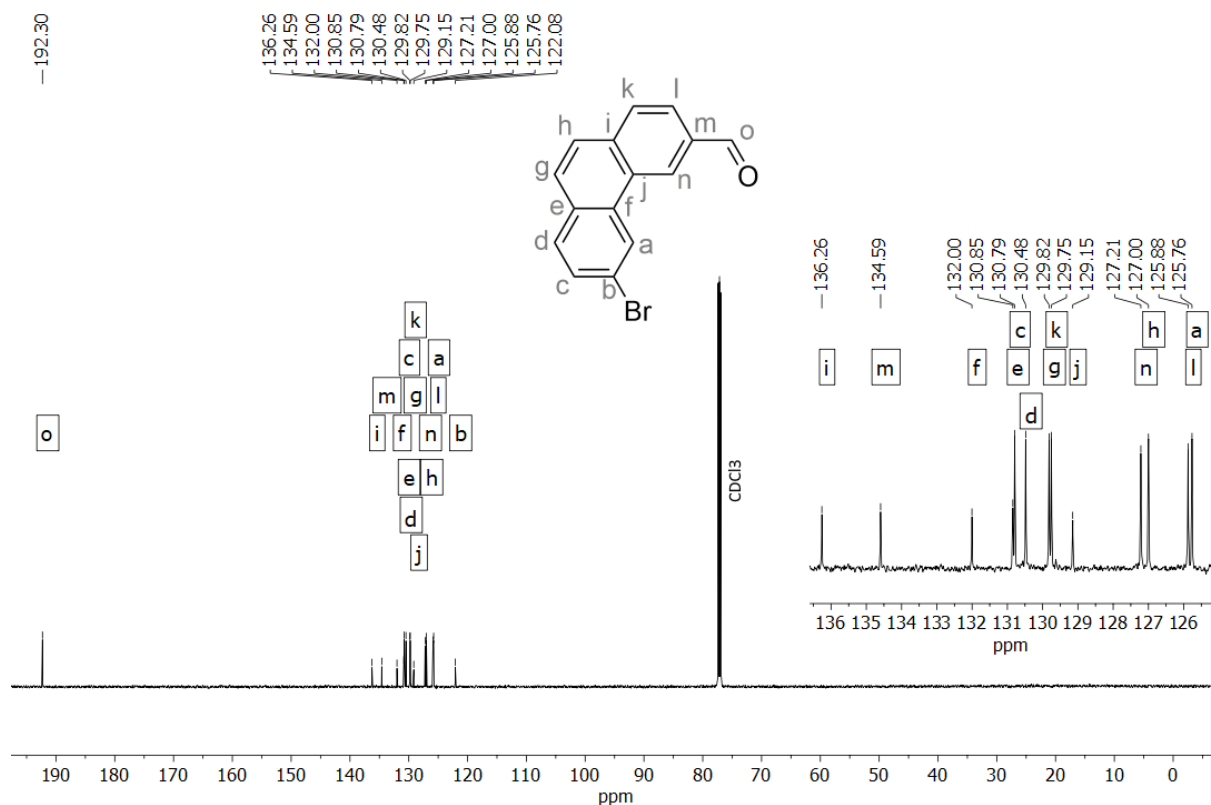

**6.16. (Z)-6-Bromo-3-(2-(4-bromophenyl)ethenyl)phenanthrene (10)**

<sup>1</sup>H NMR (601 MHz, CDCl<sub>3</sub>)

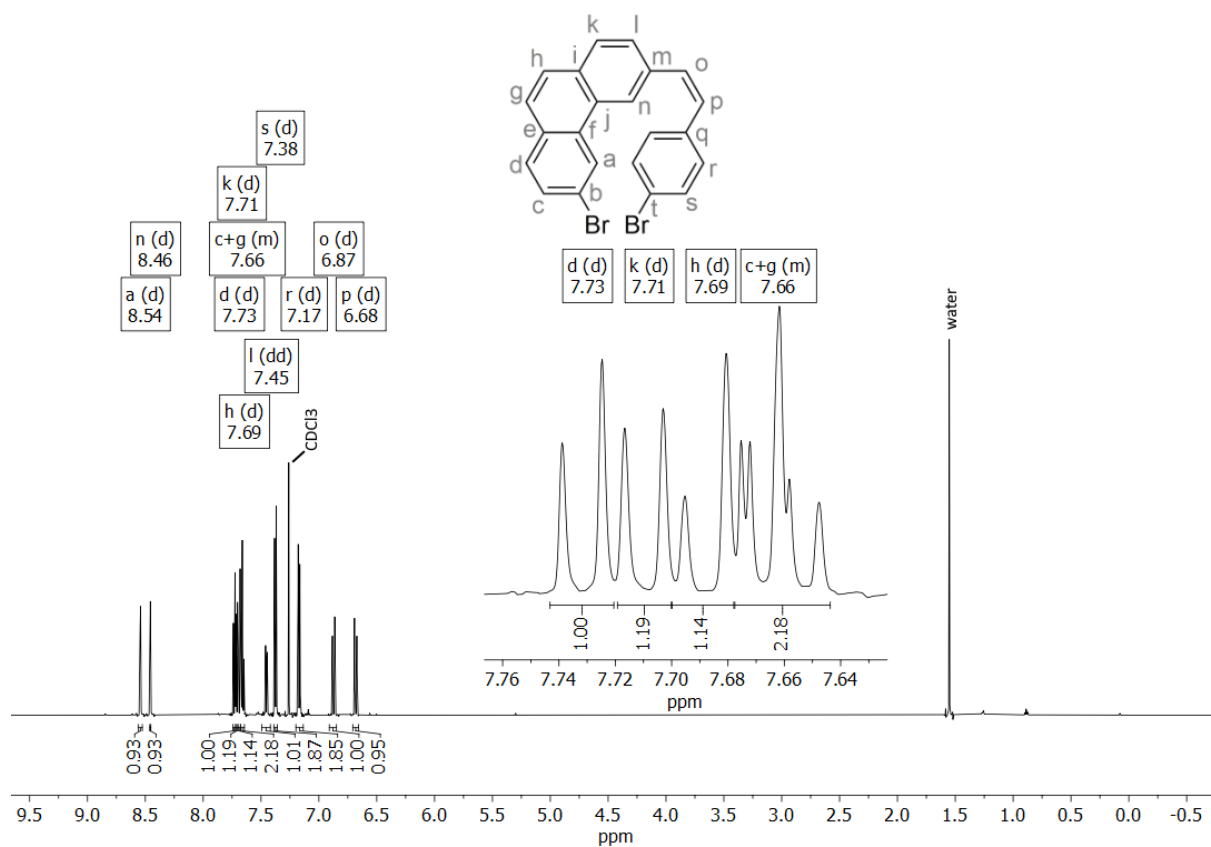

<sup>13</sup>C{<sup>1</sup>H} NMR (151 MHz, CDCl<sub>3</sub>)

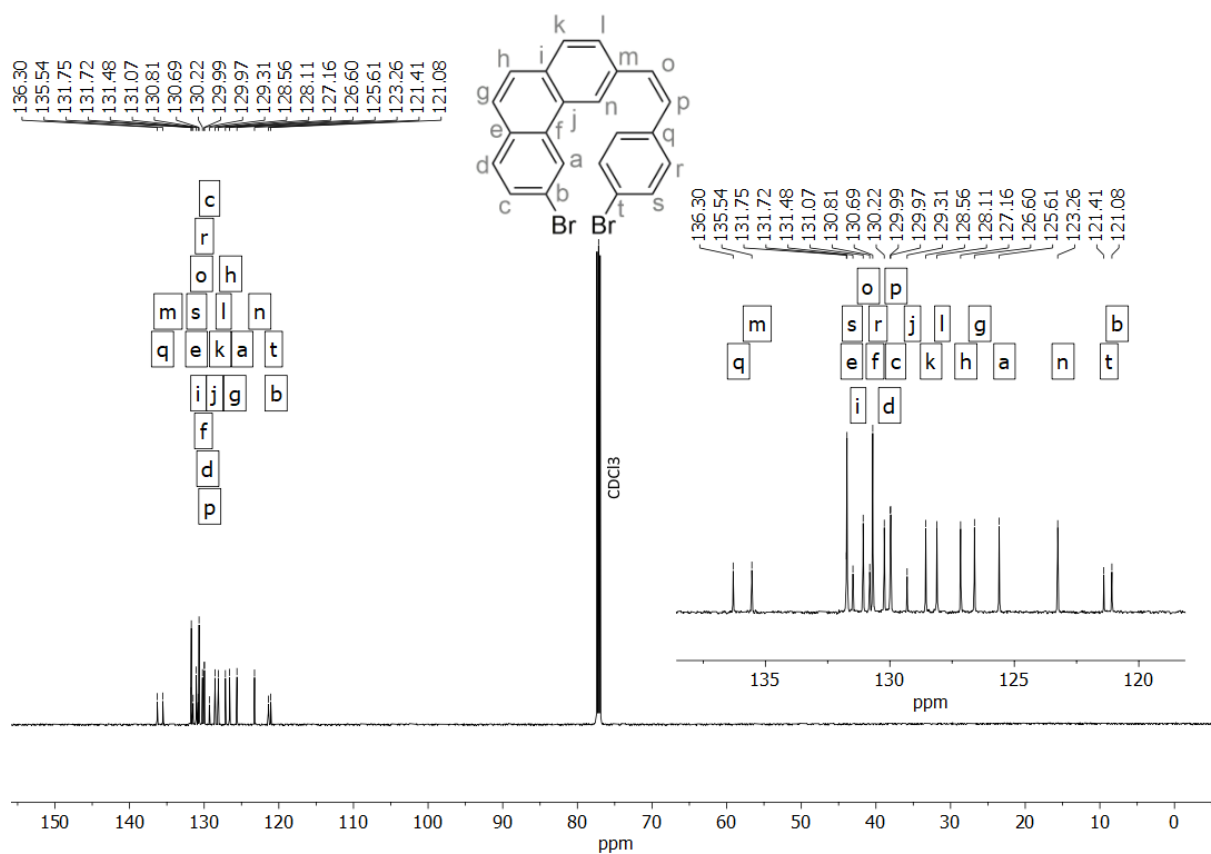

### 6.17. 2,13-Dibromopentahelicene (12)

$^1\text{H}$  NMR (601 MHz,  $\text{C}_6\text{D}_6$ )

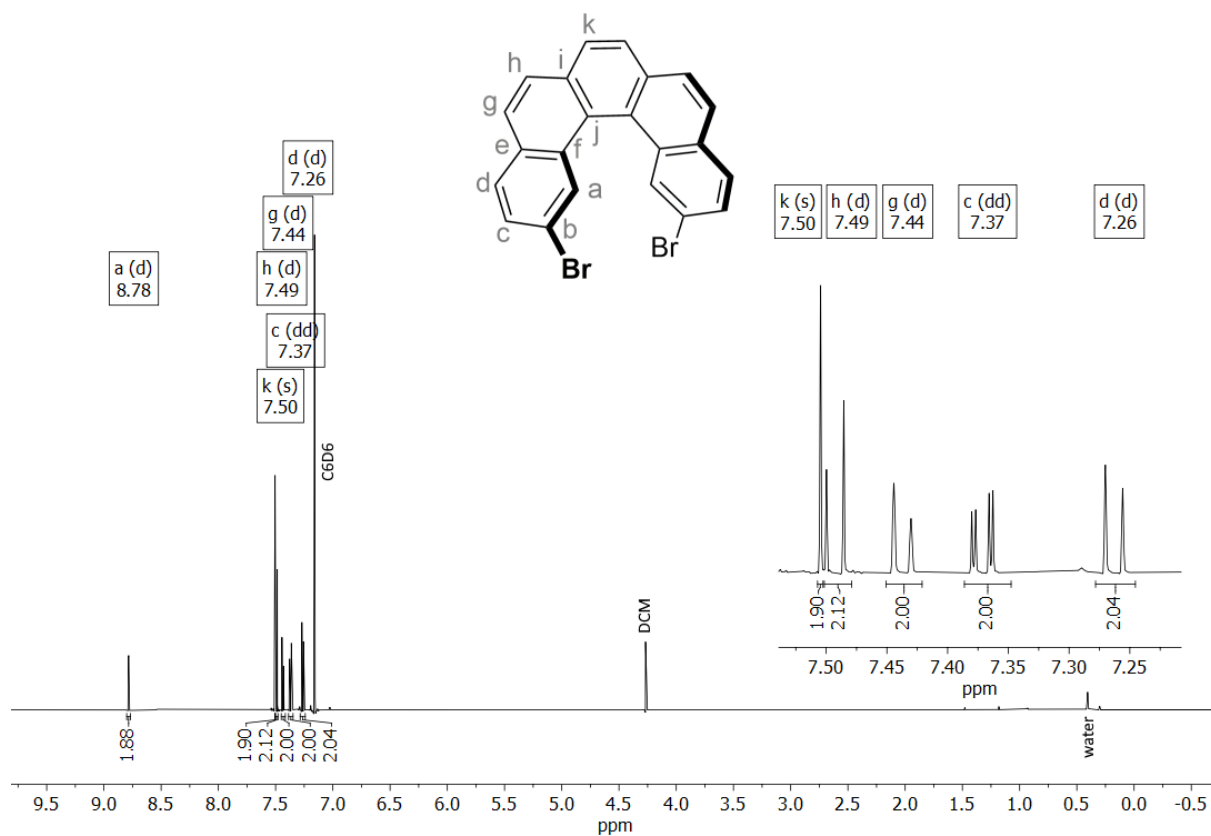

$^{13}\text{C}\{^1\text{H}\}$  NMR (151 MHz,  $\text{C}_6\text{D}_6$ )

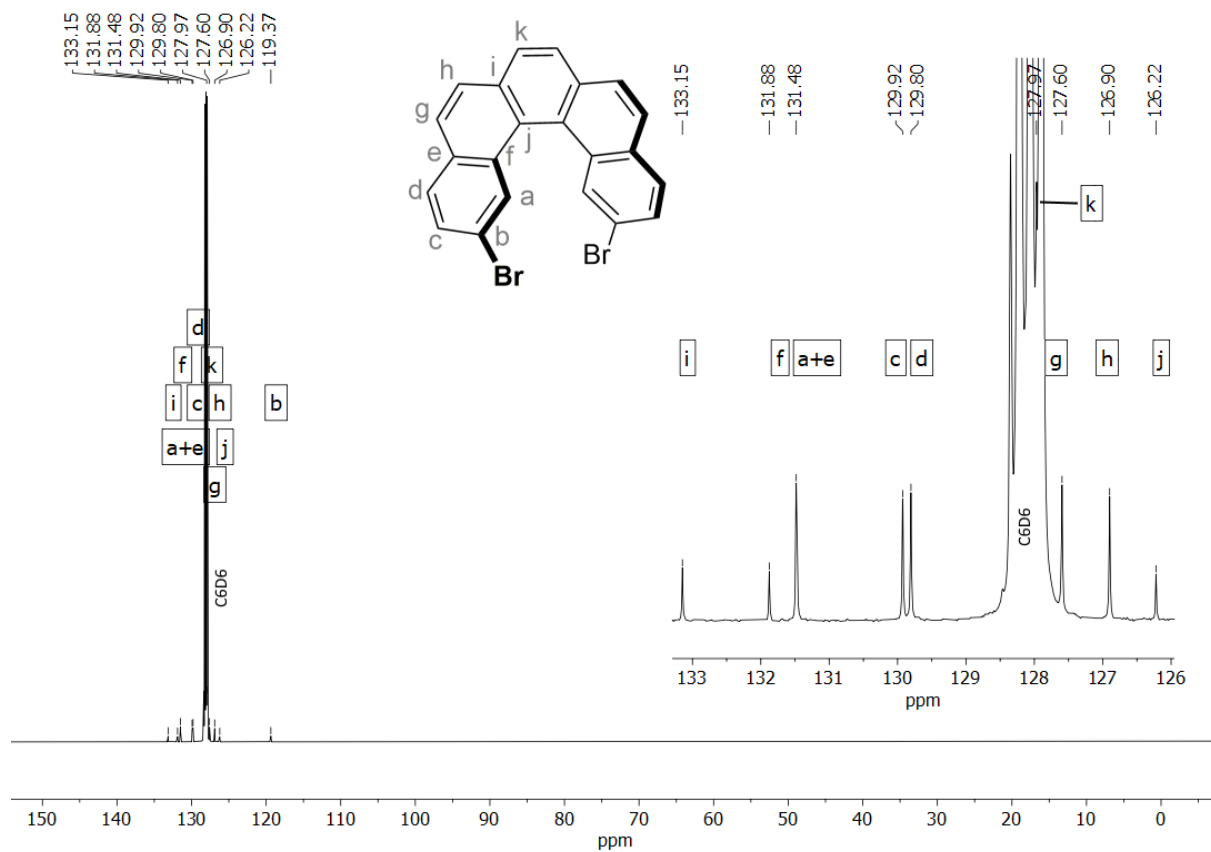

### 6.18. 2,13-Dimesitylpentahelicene (CC[5])

$^1\text{H}$  NMR (601 MHz,  $\text{CD}_2\text{Cl}_2$ )

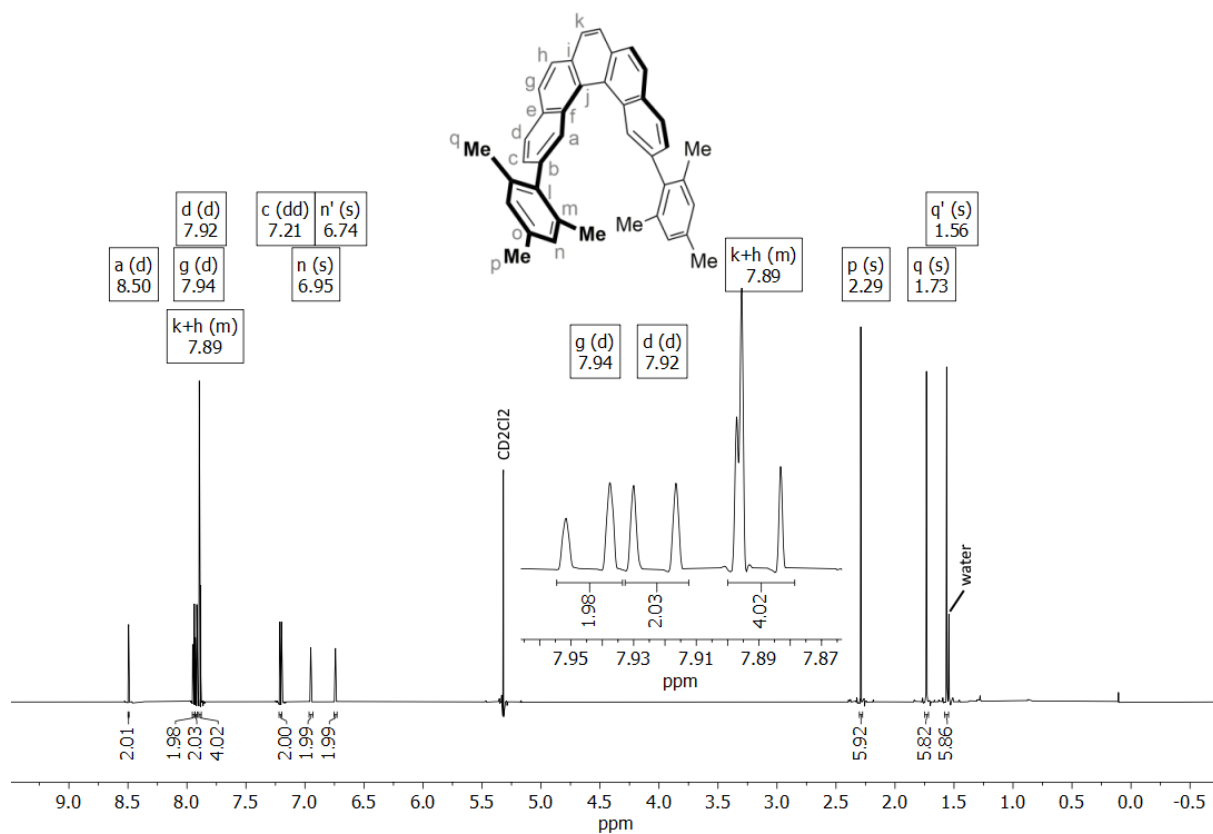

$^{13}\text{C}\{^1\text{H}\}$  NMR (151 MHz,  $\text{CD}_2\text{Cl}_2$ )

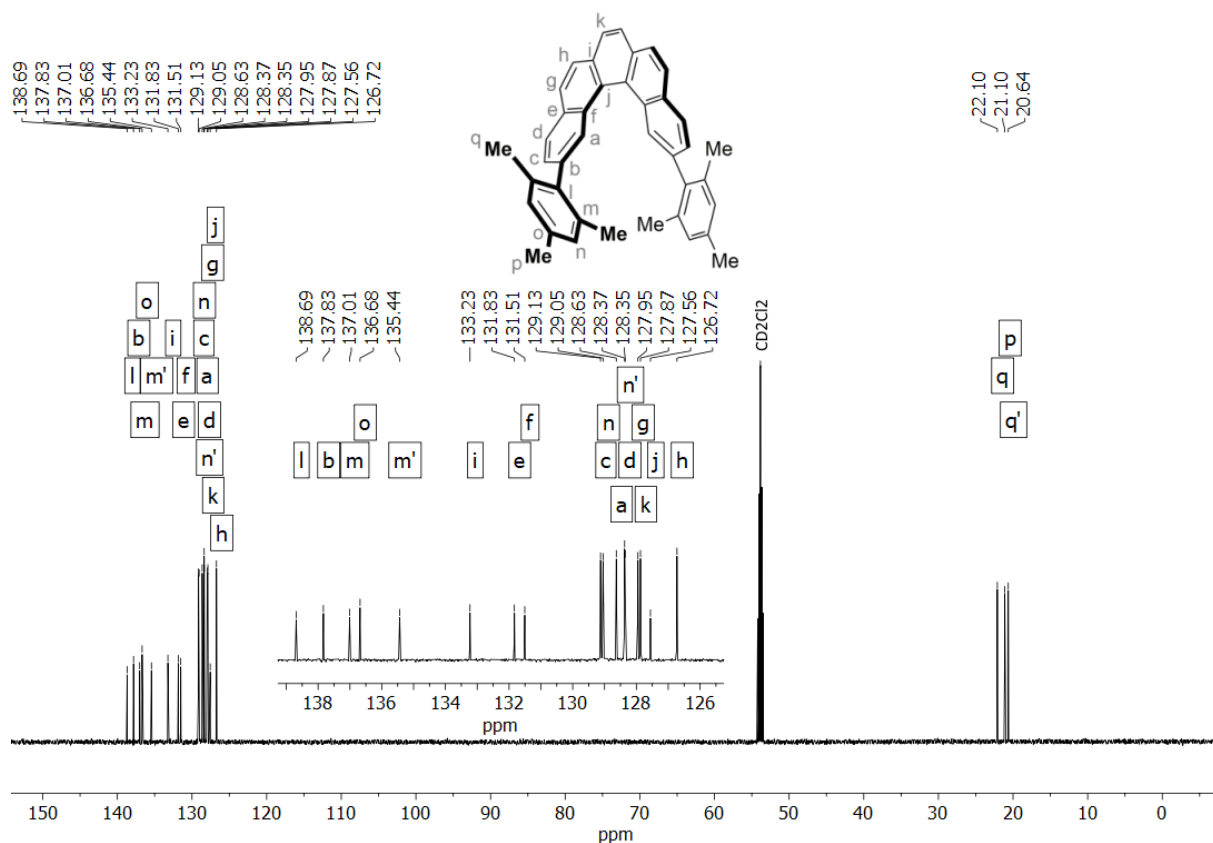

### 6.19. 2,7-bis(Trifluoromethylsulfonyl)naphthalene (20)

$^1\text{H}$  NMR (601 MHz,  $\text{CDCl}_3$ )

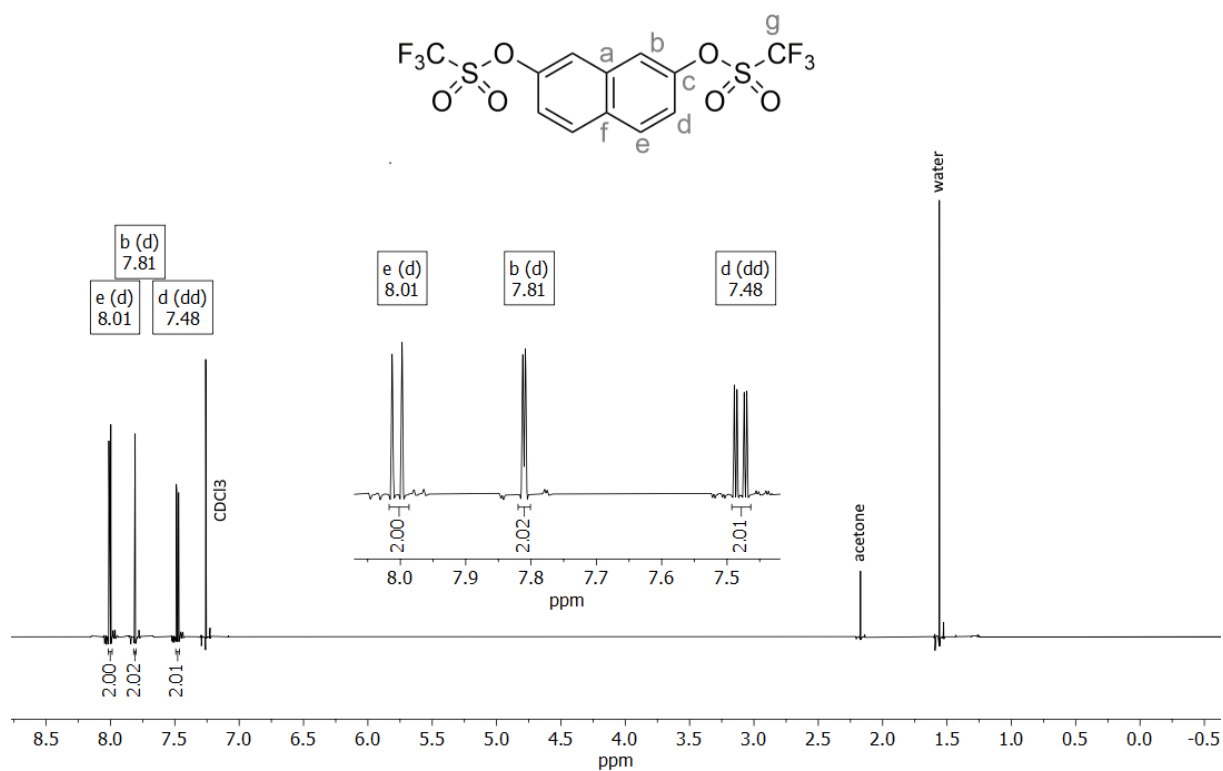

$^{13}\text{C}\{^1\text{H}\}$  NMR (151 MHz,  $\text{CDCl}_3$ )

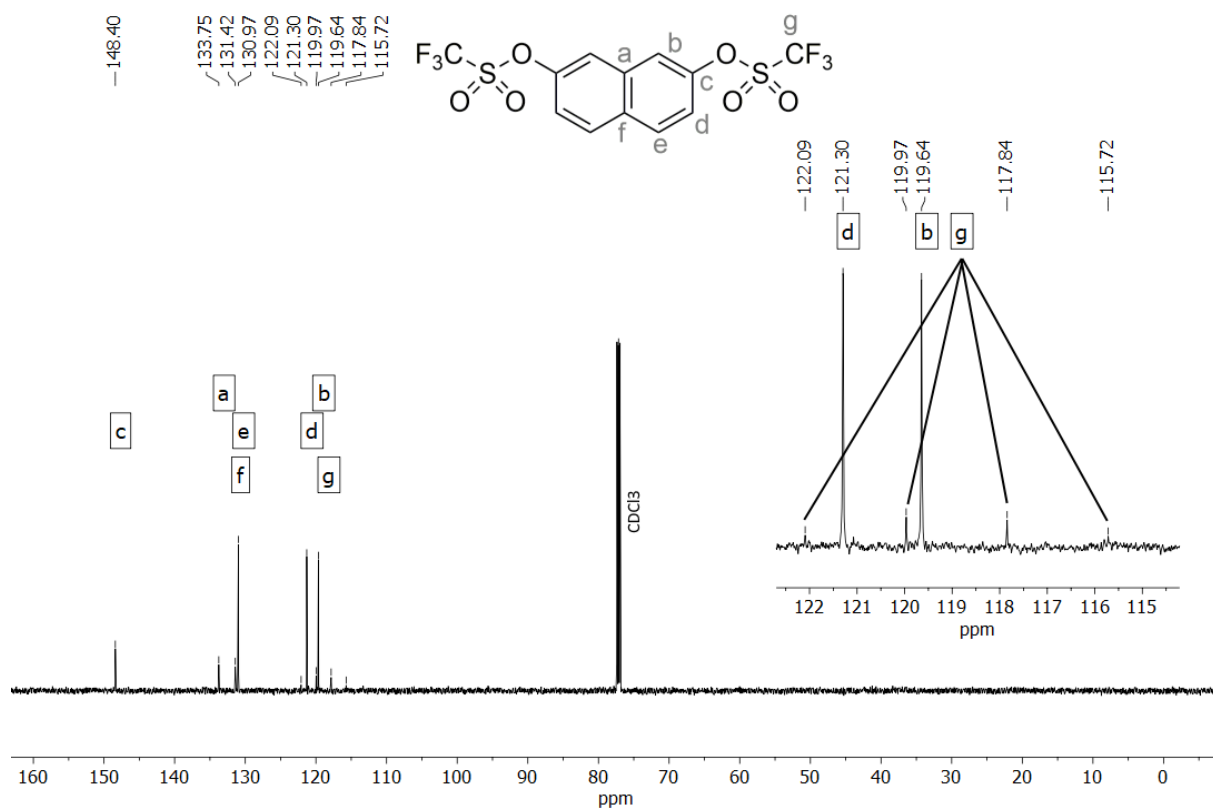

$^{19}\text{F}$  NMR (565 MHz,  $\text{CDCl}_3$ )

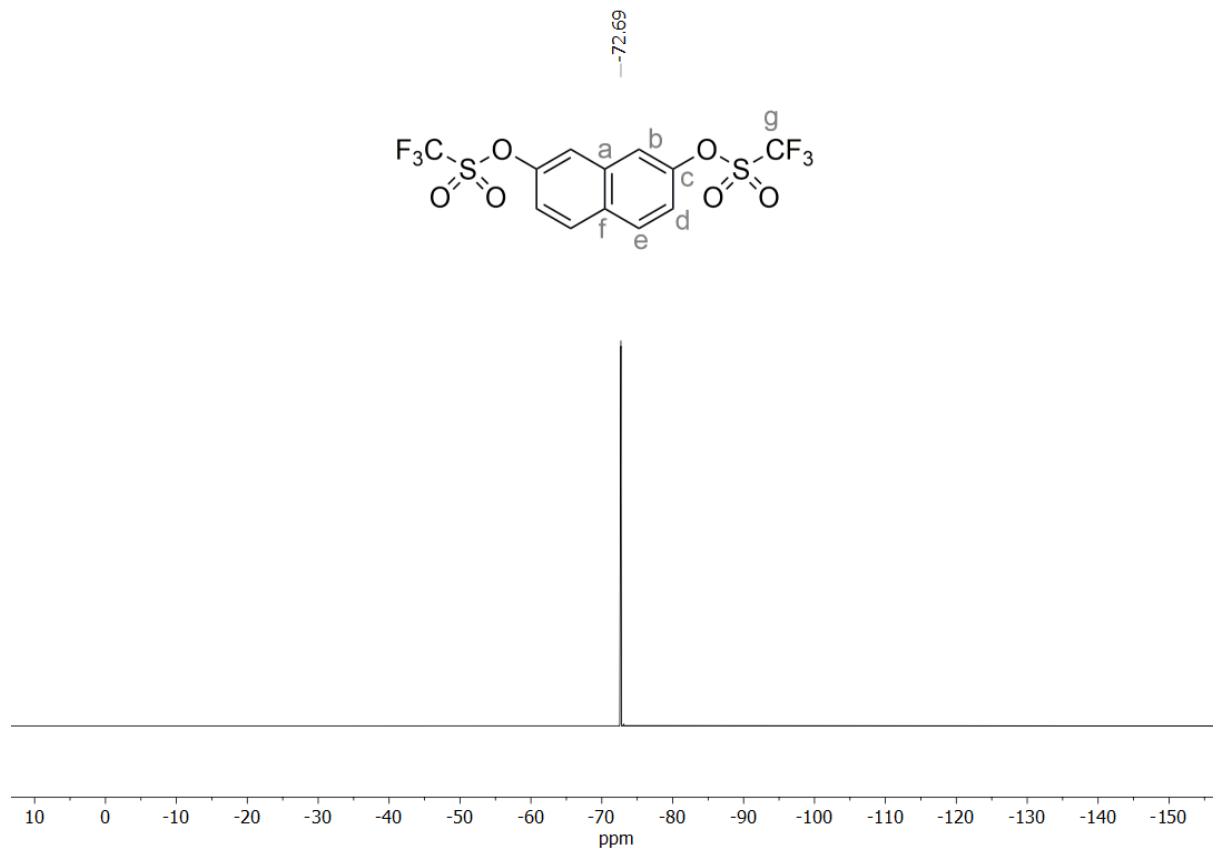

### 6.20. 2,7-Dimethylnaphthalene (21)

$^1\text{H}$  NMR (601 MHz,  $\text{CDCl}_3$ )

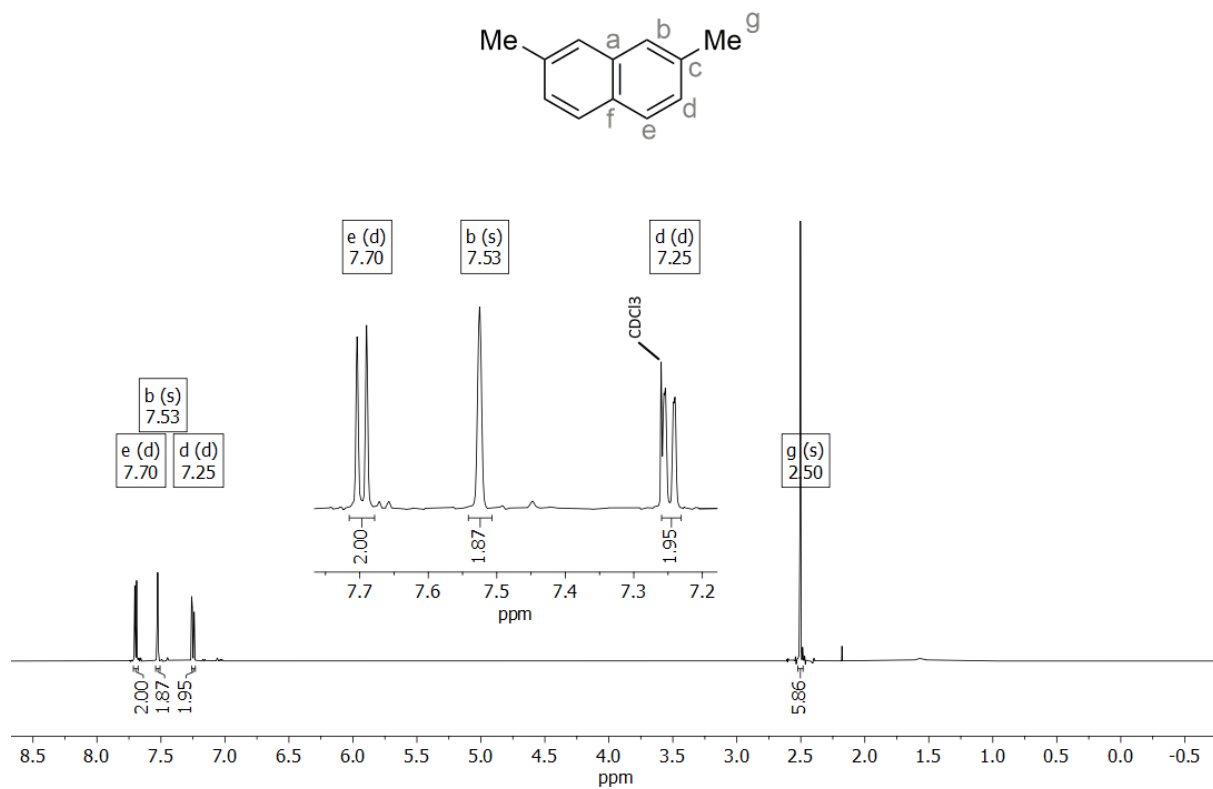

$^{13}\text{C}\{^1\text{H}\}$  NMR (151 MHz,  $\text{CDCl}_3$ )

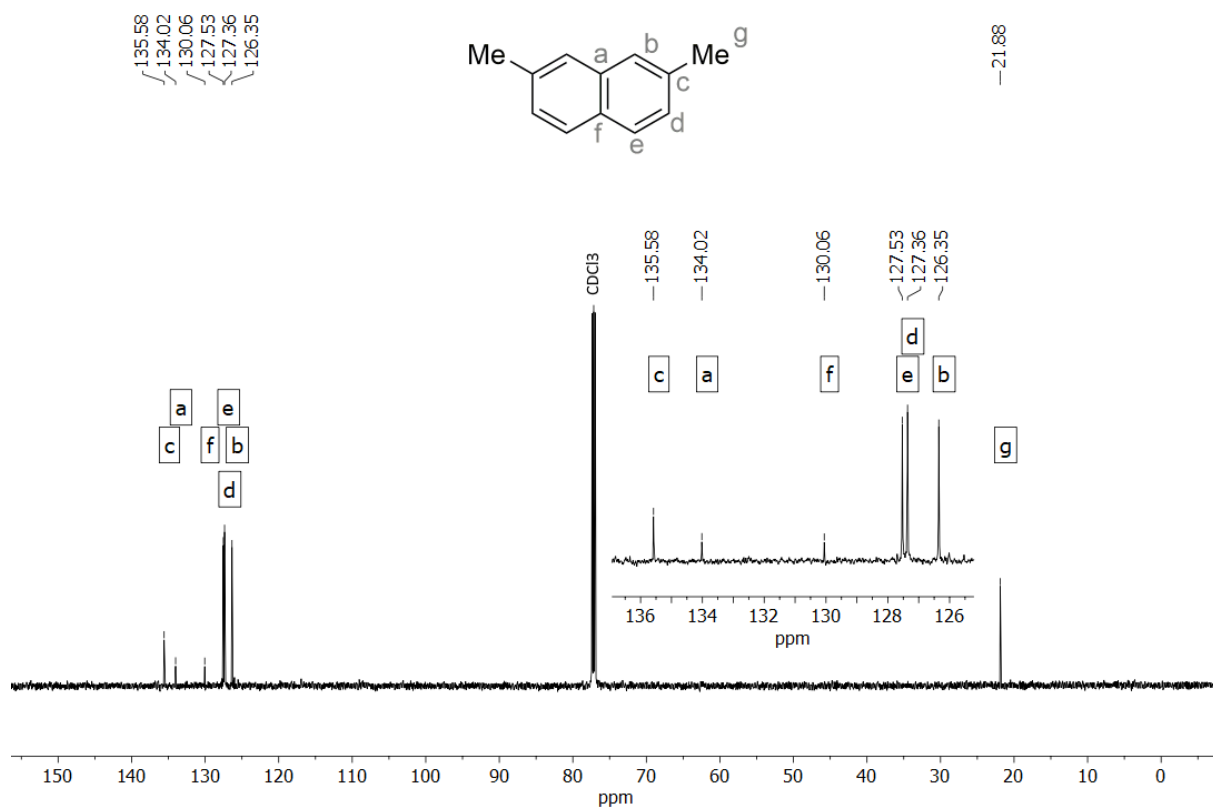

### 6.21. 2,7-bis(Bromomethyl)naphthalene (22)

$^1\text{H}$  NMR (601 MHz,  $\text{CDCl}_3$ )

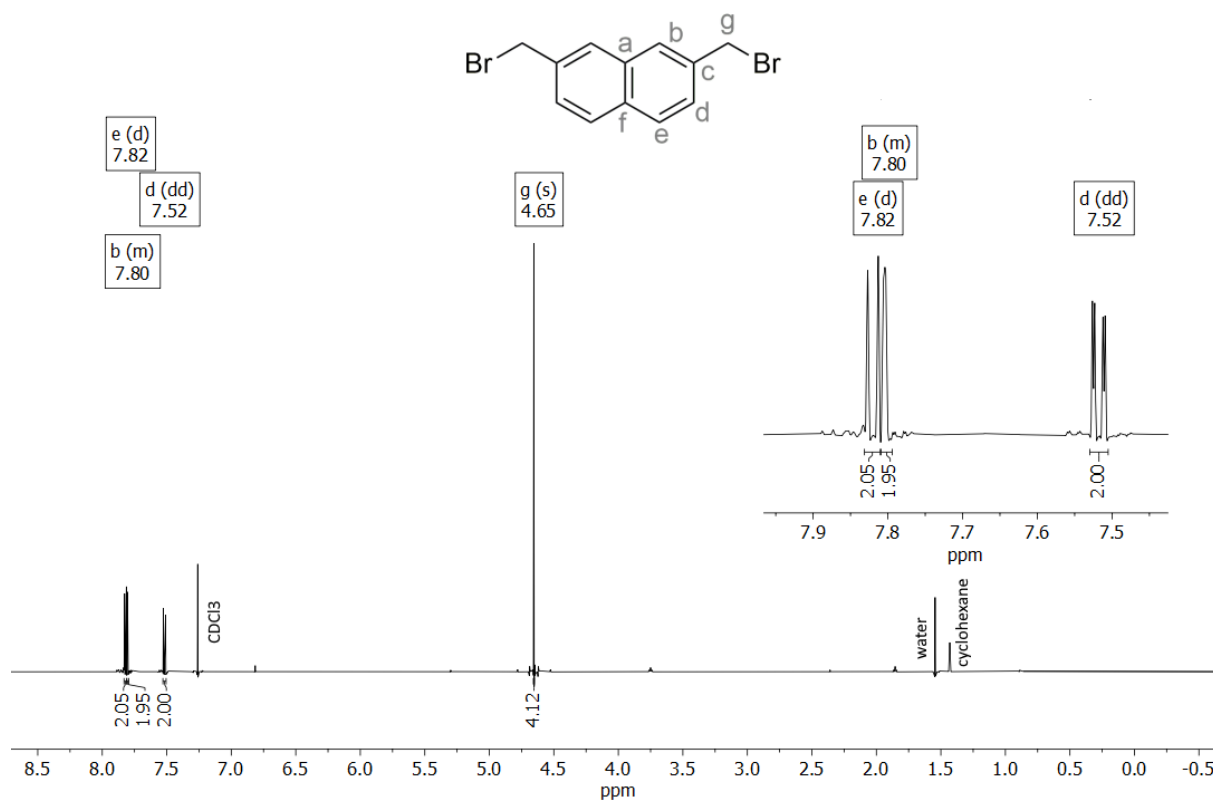

$^{13}\text{C}\{^1\text{H}\}$  NMR (151 MHz,  $\text{CDCl}_3$ )

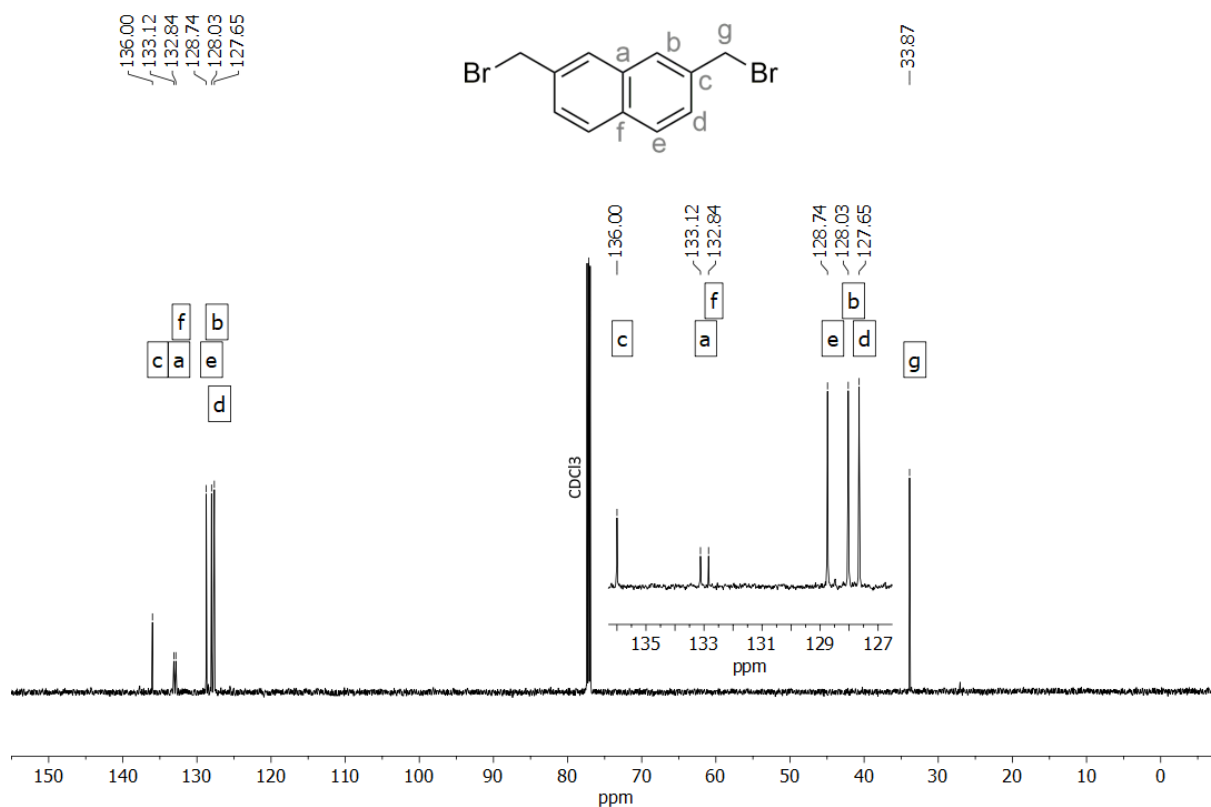

## 6.22. Naphthalene-2,7-bis(methylenetriphenylphosphonium) dibromide (23)

$^1\text{H}$  NMR (601 MHz,  $\text{DMSO}-d_6$ )

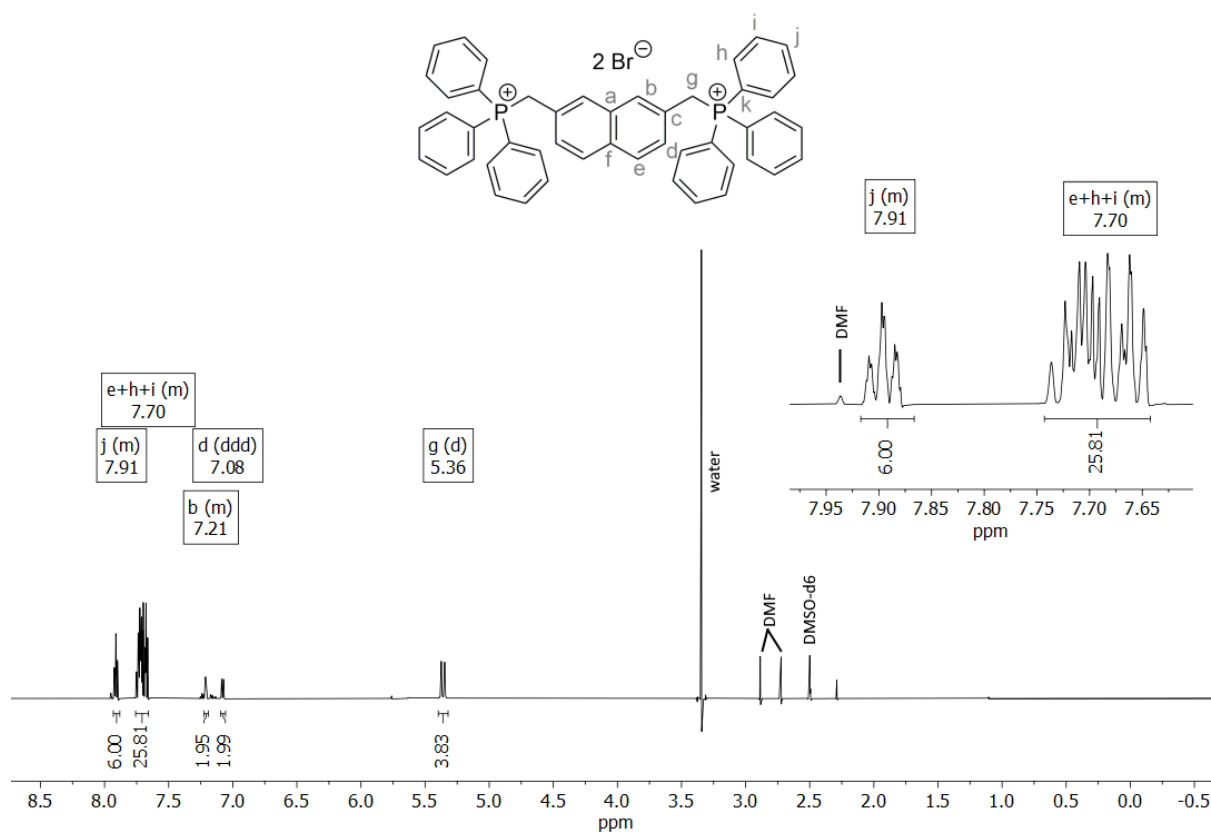



$^{13}\text{C}\{^1\text{H}\}$  NMR (151 MHz,  $\text{DMSO-}d_6$ )

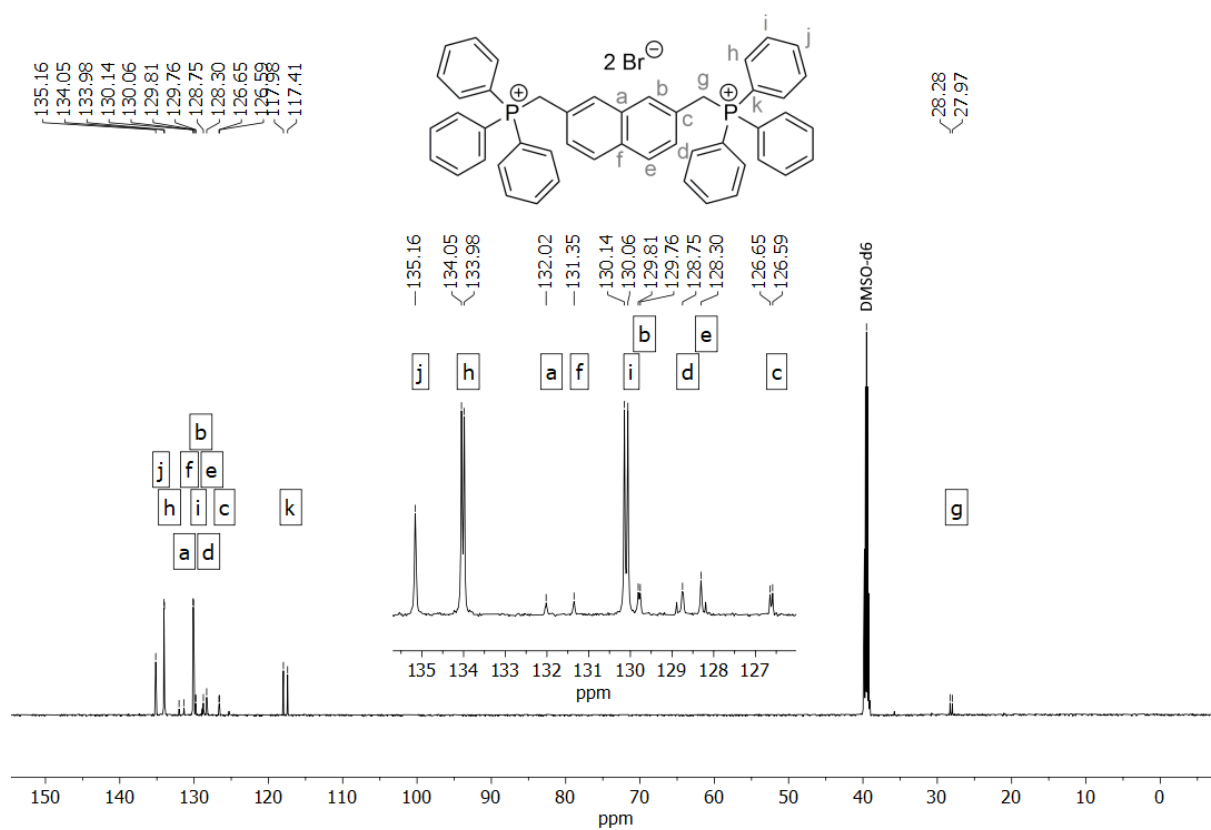

$^{31}\text{P}\{^1\text{H}\}$  NMR (243 MHz,  $\text{DMSO-}d_6$ )

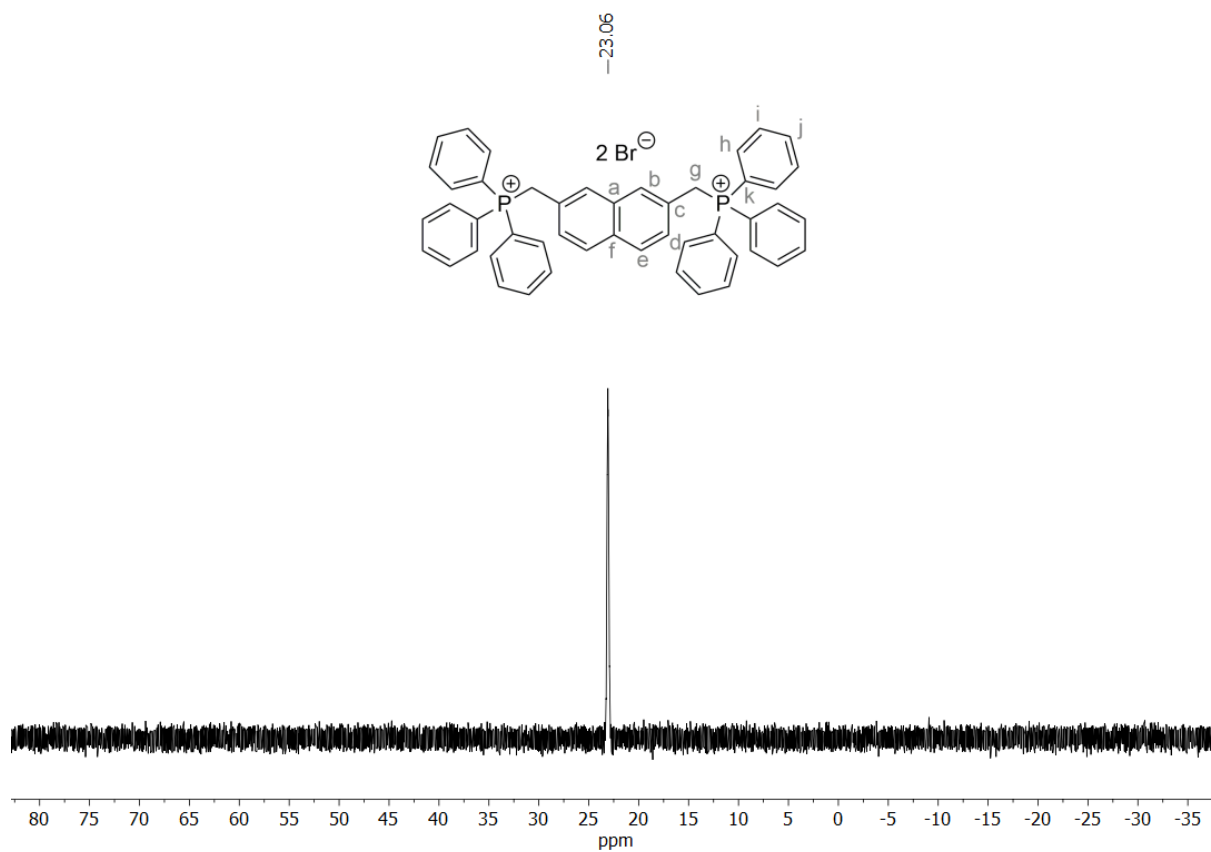

**6.23. (Z,Z)-2,7-bis(2-(4-Bromophenyl)ethenyl)naphthalene (11)**

<sup>1</sup>H NMR (601 MHz, CDCl<sub>3</sub>)

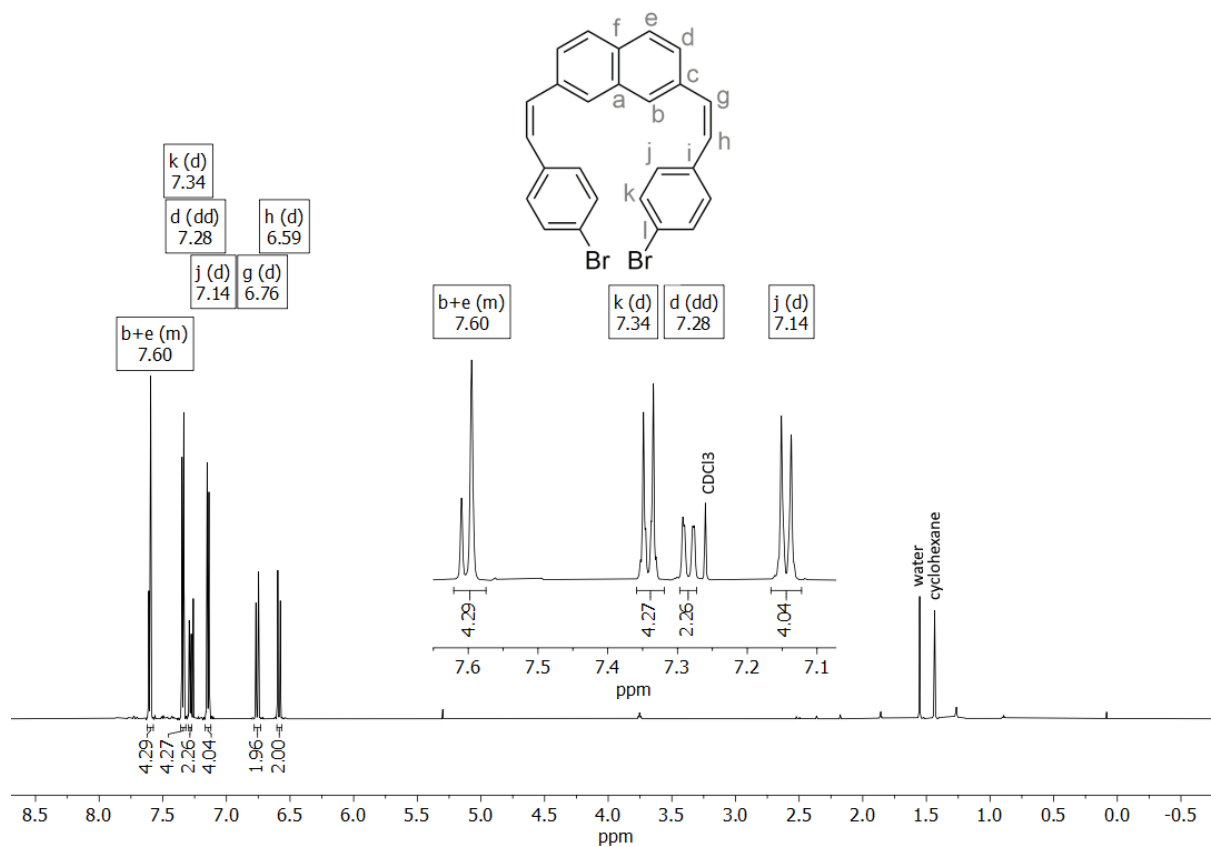

<sup>13</sup>C{<sup>1</sup>H} NMR (151 MHz, CDCl<sub>3</sub>)

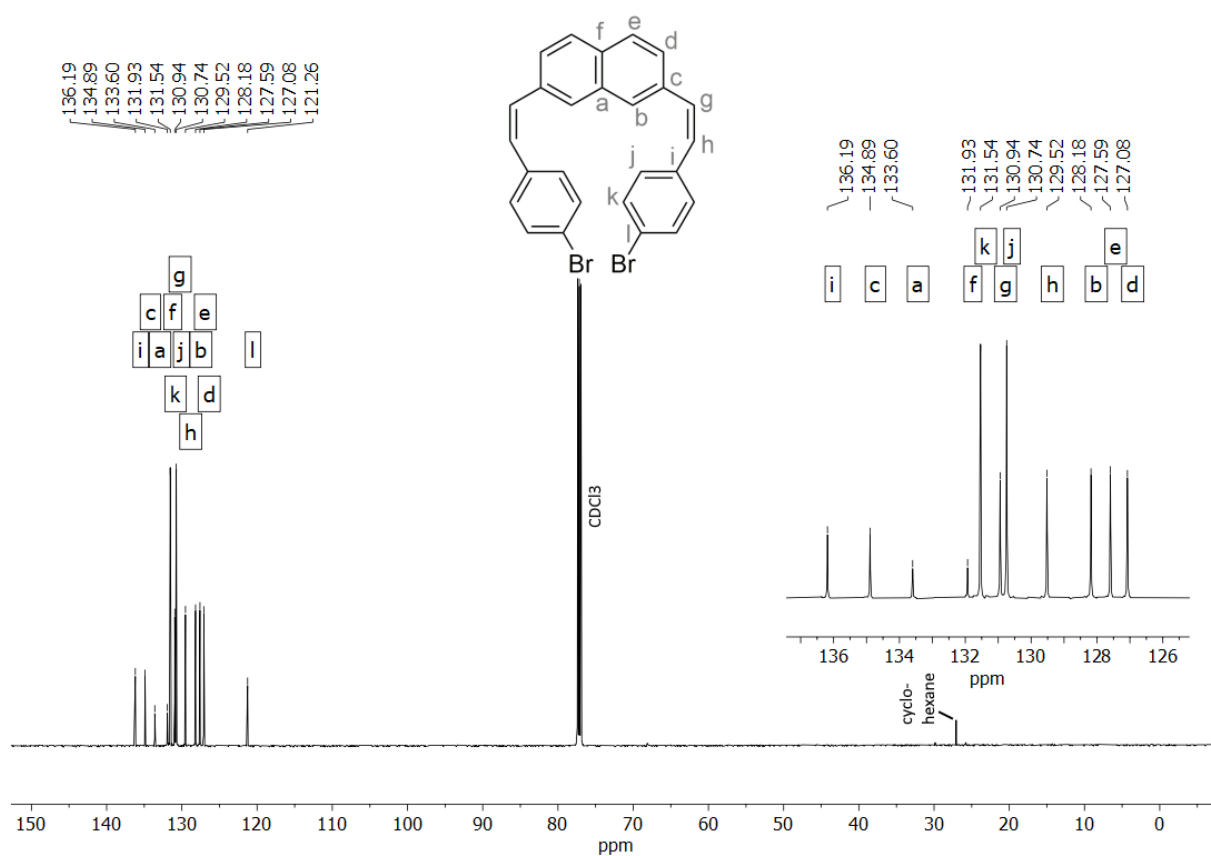

### 6.24. 2,15-Dibromohexahelicene (13)

$^1\text{H}$  NMR (601 MHz,  $\text{CDCl}_3$ )

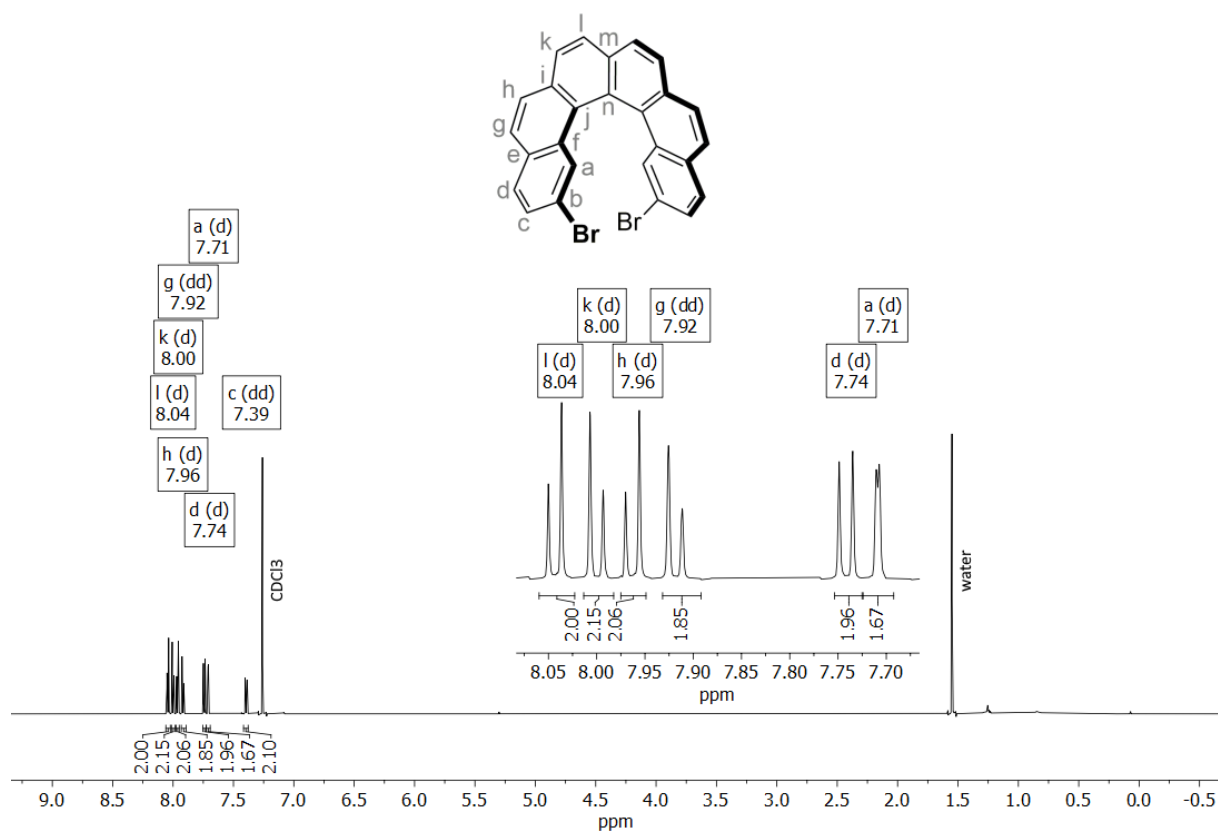

$^{13}\text{C}\{^1\text{H}\}$  NMR (151 MHz,  $\text{CDCl}_3$ )

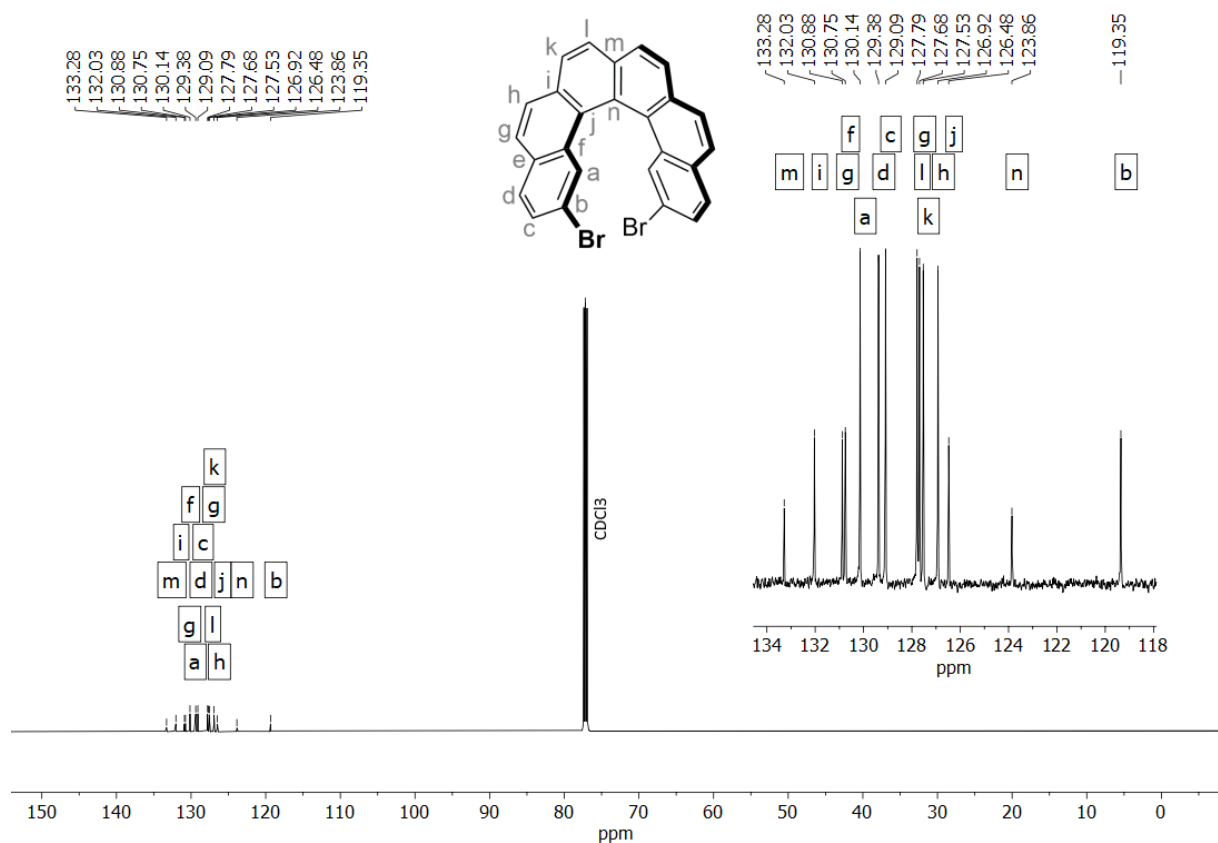

### 6.25. 2,15-Dimesitylhexahelicene (CC[6])

$^1\text{H}$  NMR (601 MHz,  $\text{CDCl}_3$ )

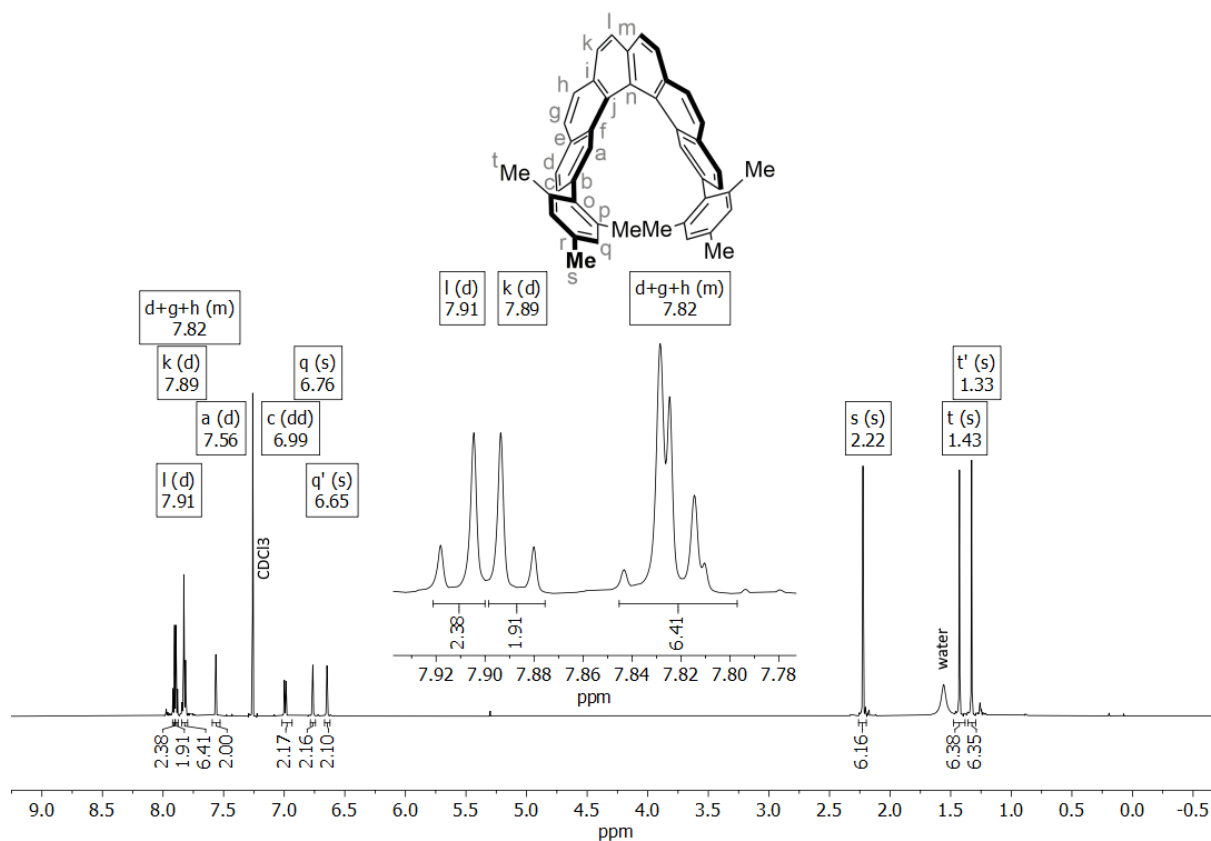

$^{13}\text{C}\{^1\text{H}\}$  NMR (151 MHz,  $\text{CDCl}_3$ )

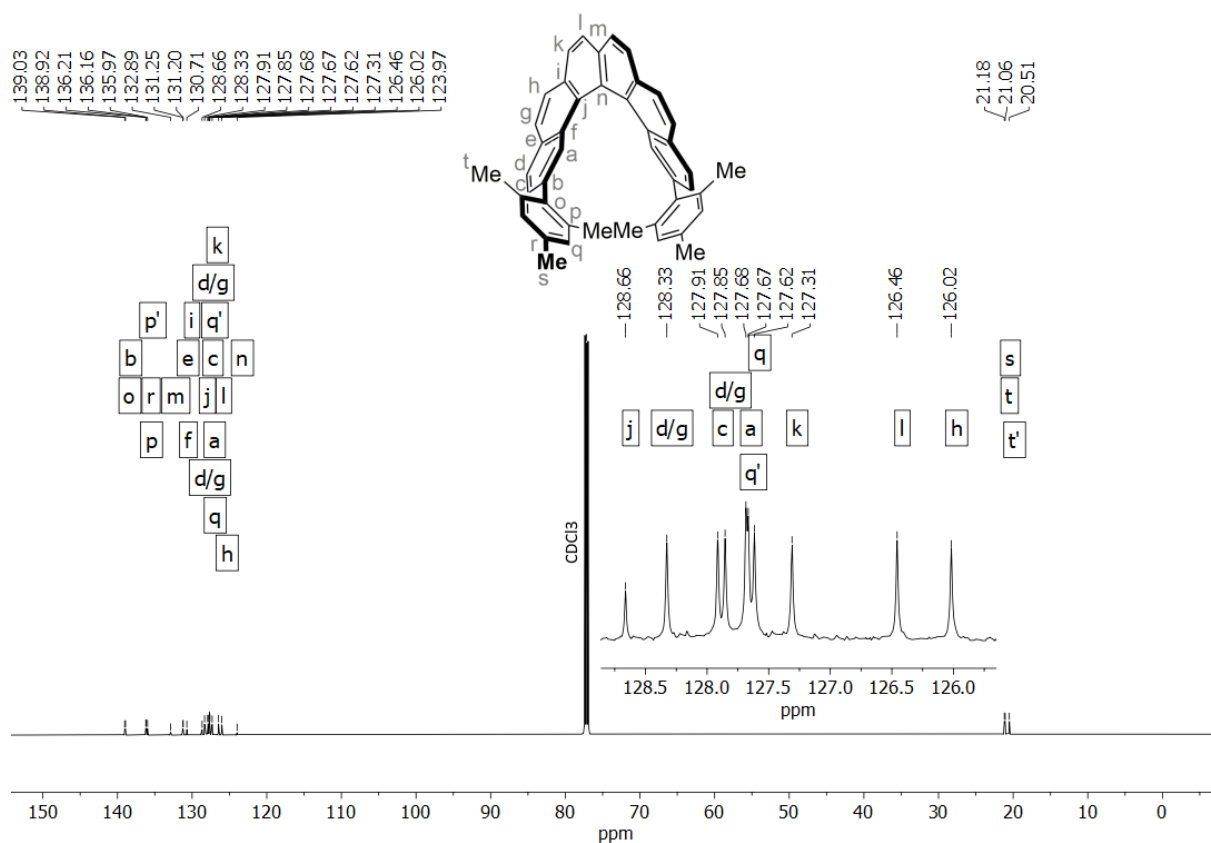

$^1\text{H}$  NMR (601 MHz,  $\text{C}_6\text{D}_6$  + trace of DCM). This solvent mixture allowed the best separation of the proton signals and sufficient solubility of the compound for  $^1\text{H}$  NMR spectroscopy at the same time. The  $^{13}\text{C}\{^1\text{H}\}$  NMR spectrum is not depicted due to the large overlap of the residual solvent signal of  $\text{C}_6\text{D}_6$  and the signals of the compound.

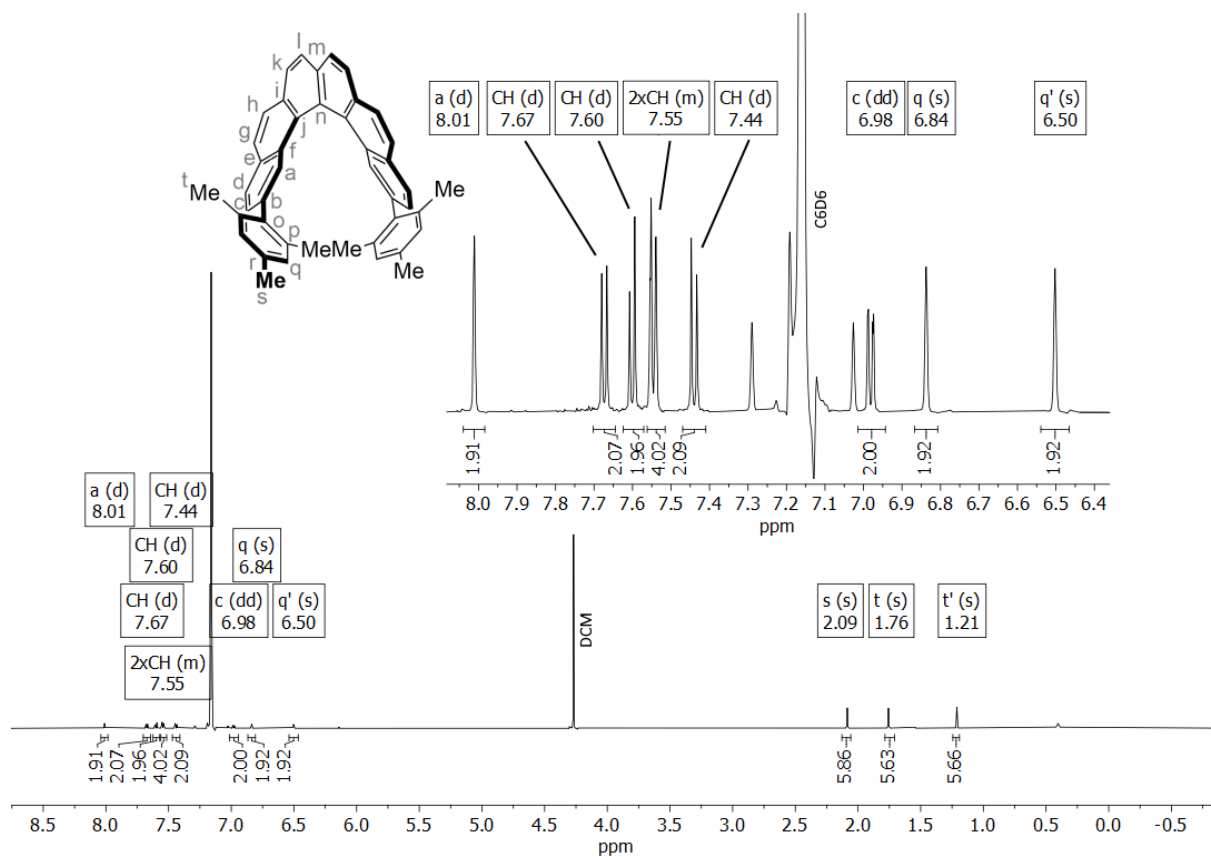

## 6.26. Temperature-Dependent $^1\text{H}$ NMR Measurements

Temperature-dependent  $^1\text{H}$  NMR spectra of the investigated helicenes were measured in chloroform- $d_1$  (BN-helicenes, Fig. S28) or tetrachloroethane- $d_2$  (carbohelicenes, Fig. S29) to analyze the rotation of the mesityl-units around the Mes-helicene single bonds.

At 24  $^\circ\text{C}$ , both heterohelicenes showed one singlet for all aromatic protons and all *ortho*-methyl groups of the mesityl-substituents, respectively. Upon cooling to  $-30$   $^\circ\text{C}$  (maximum cooling temperature of the probe head), the spectrum of **BN[5]** was nearly unchanged besides a small upfield shift of the *NH* resonance. The aromatic region of the  $^1\text{H}$  NMR spectrum of **BN[6]** remained identical upon cooling, yet a broadening of the singlet that represents the *ortho*-methyl groups of the mesityl-substituents was found.

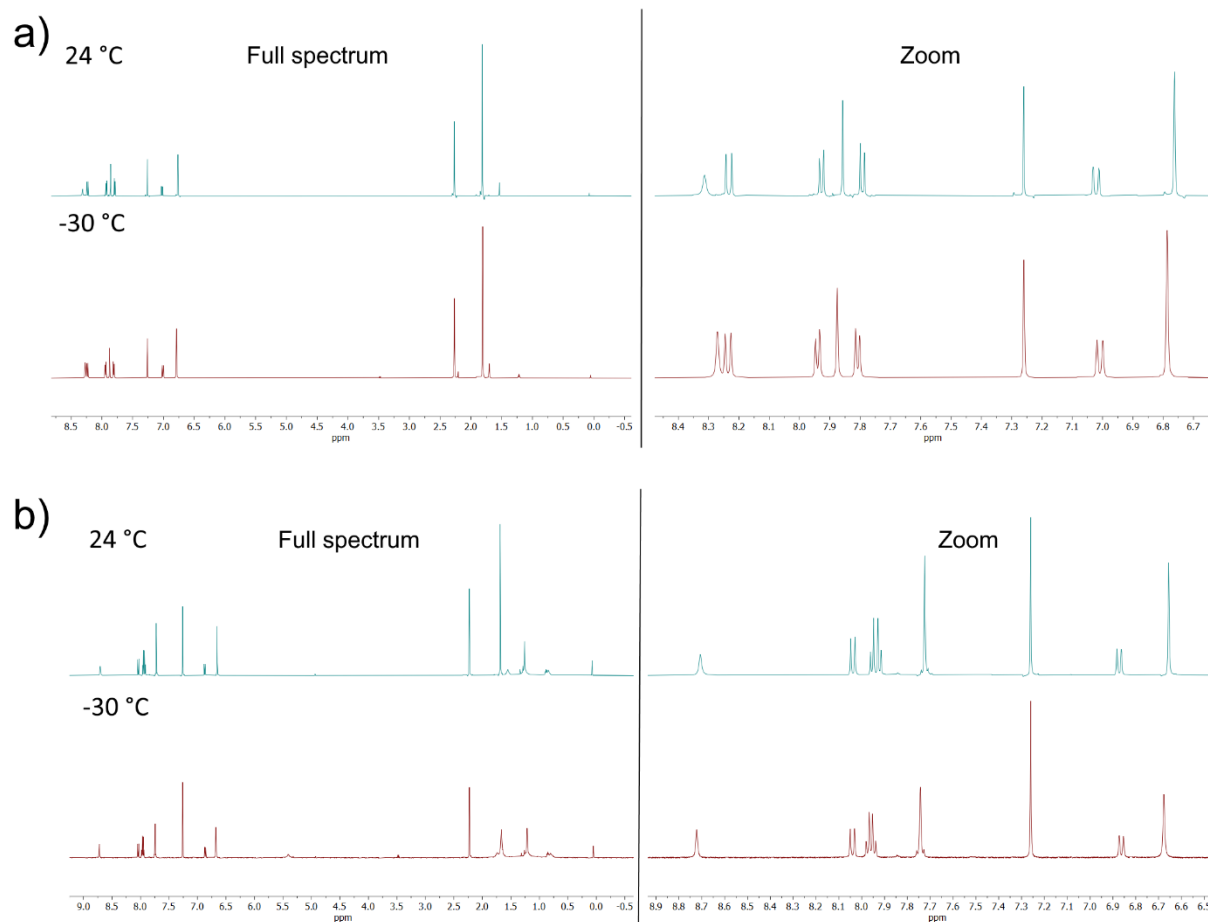

**Fig. S28.** Temperature-dependent  $^1\text{H}$  NMR spectra of **BN[5]** (a) and **BN[6]** (b).

In contrast, both carbohelicenes showed two clearly separated proton signals for each aromatic proton and each *ortho*-methyl group of the mesityl-substituent at 24 °C. Coalescence does not occur for both **CC[5]** and **CC[6]** up to 80 °C (maximum heating temperature of the probe head), however, the signals of **CC[5]** clearly broadened and almost coalesced. The signals of **CC[6]** were only slightly broadened at 80 °C, which hints at a comparatively higher coalescence temperature.

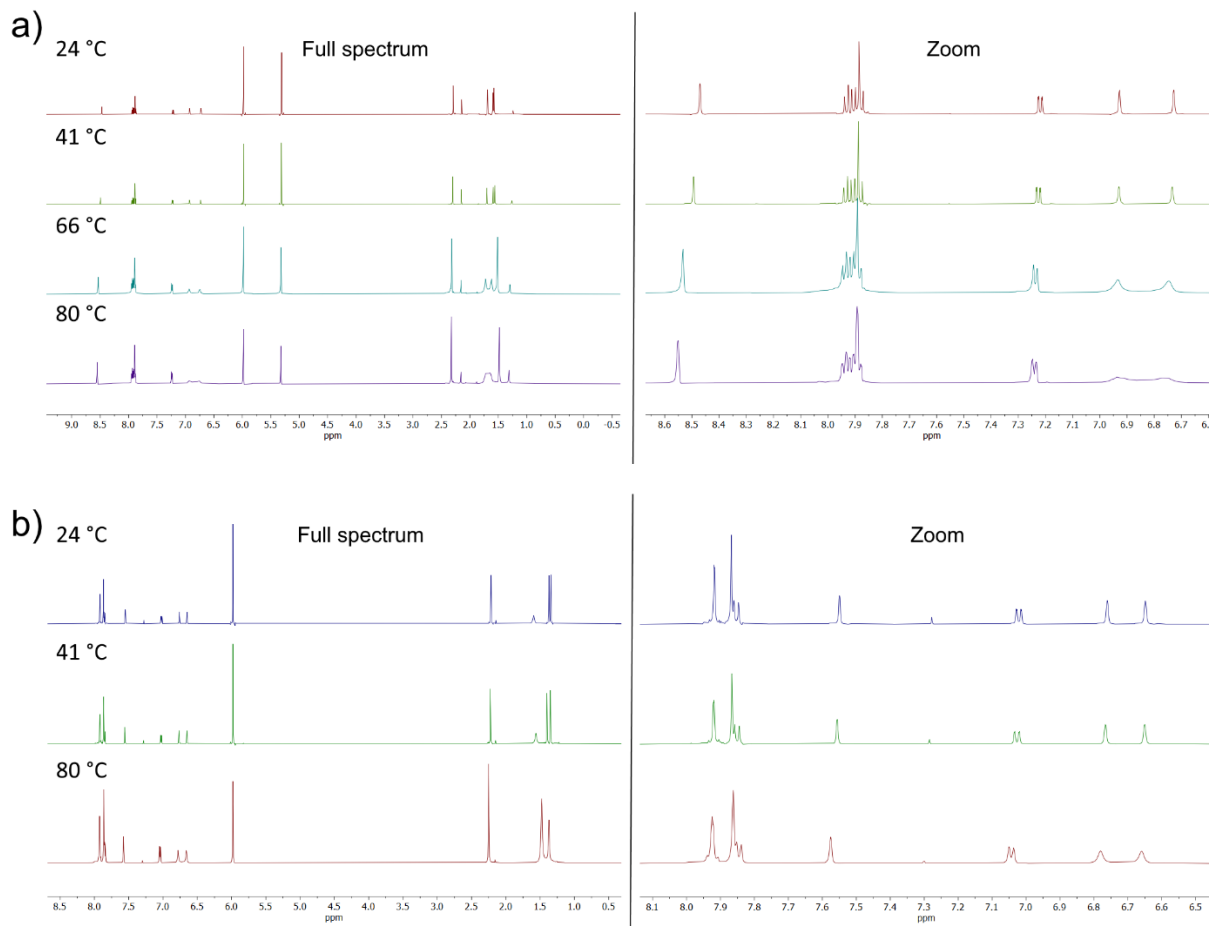

**Fig. S29.** Temperature-dependent <sup>1</sup>H NMR spectra of **CC[5]** (a) and **CC[6]** (b).

## 7. Calculations

### 7.1. Structure Optimizations

All calculations were run with Q-Chem 5.4 / 6.0<sup>20</sup> or Gaussian 09, Rev. B.01.<sup>21</sup> The structures were pre-optimized using a universal force field method (UFF).<sup>22</sup> Geometry optimizations of the ground states ( $S_0$ ) and the first electronically excited singlet states ( $S_1$ ) were carried out with Density Functional Theory (DFT)<sup>23,24</sup> at the B3LYP<sup>25-27</sup> / cc-pVDZ<sup>28</sup> level of theory. The absence of imaginary frequencies confirmed that the obtained geometries were indeed energetic minima. The coordinates of the optimized structures are denoted in Table S49 – Table S53.

**Table S49.** Coordinates of the optimized structure of **BN[5]** (atom / x,y,z coordinates [Å]).

| $S_0$ of <b>BN[5]</b> |             |             |             | $S_1$ of <b>BN[5]</b> |             |             |             |
|-----------------------|-------------|-------------|-------------|-----------------------|-------------|-------------|-------------|
| C                     | 0.08446200  | 1.41721800  | 4.24576400  | C                     | 0.00515300  | 1.42591700  | 4.27260600  |
| C                     | 0.16284900  | 0.71313400  | 3.00484000  | C                     | 0.13694100  | 0.72436000  | 3.01500200  |
| C                     | -0.16284900 | -0.71313400 | 3.00484000  | C                     | -0.13694100 | -0.72436000 | 3.01500200  |
| C                     | -0.08446200 | -1.41721800 | 4.24576400  | C                     | -0.00515300 | -1.42591700 | 4.27260600  |
| C                     | 0.01434400  | -0.68167900 | 5.47094500  | C                     | 0.05276000  | -0.70157400 | 5.47174800  |
| C                     | -0.01434400 | 0.68167900  | 5.47094500  | C                     | -0.05276000 | 0.70157400  | 5.47174800  |
| C                     | 0.68978900  | 1.44648400  | 1.87848100  | C                     | 0.68139900  | 1.44953000  | 1.92071500  |
| C                     | 0.81341700  | 2.86000900  | 1.93483600  | C                     | 0.77460600  | 2.89304500  | 1.96109100  |
| C                     | 0.49831500  | 3.53798000  | 3.14209500  | C                     | 0.39160000  | 3.56582100  | 3.15979600  |
| C                     | 0.19904400  | 2.83395800  | 4.28075700  | C                     | 0.05276000  | 2.86413500  | 4.28360100  |
| C                     | -0.19904400 | -2.83395800 | 4.28075700  | C                     | -0.05276000 | -2.86413500 | 4.28360100  |
| C                     | -0.49831500 | -3.53798000 | 3.14209500  | C                     | -0.39160000 | -3.56582100 | 3.15979600  |
| C                     | -0.81341700 | -2.86000900 | 1.93483600  | C                     | -0.77460600 | -2.89304500 | 1.96109100  |
| C                     | -0.68978900 | -1.44648400 | 1.87848100  | C                     | -0.68139900 | -1.44953000 | 1.92071500  |
| N                     | 1.18994000  | 0.80798900  | 0.75673500  | N                     | 1.18848900  | 0.82064200  | 0.79878000  |
| B                     | 1.82321300  | 1.43686600  | -0.36946100 | B                     | 1.77038500  | 1.47055500  | -0.35415700 |
| C                     | -1.34548300 | -3.58393700 | 0.80905000  | C                     | -1.27295100 | -3.61311400 | 0.84211500  |
| C                     | -1.82321300 | -2.96671800 | -0.31183700 | C                     | -1.73475600 | -2.99481600 | -0.30518600 |
| B                     | -1.82321300 | -1.43686600 | -0.36946100 | B                     | -1.77038500 | -1.47055500 | -0.35415700 |
| N                     | -1.18994000 | -0.80798900 | 0.75673500  | N                     | -1.18848900 | -0.82064200 | 0.79878000  |
| C                     | 2.49995100  | 0.54972800  | -1.48926600 | C                     | 2.43477400  | 0.60143700  | -1.48979900 |
| C                     | -2.49995100 | -0.54972800 | -1.48926600 | C                     | -2.43477400 | -0.60143700 | -1.48979900 |
| C                     | 2.10528500  | 0.66718400  | -2.84577500 | C                     | 2.05364300  | 0.76810900  | -2.85069200 |
| C                     | 2.73320000  | -0.10896700 | -3.83057600 | C                     | 2.66252300  | -0.00023900 | -3.85056500 |
| C                     | 3.76588400  | -1.00001800 | -3.52276100 | C                     | 3.66691300  | -0.93127700 | -3.56132400 |
| C                     | 4.16634200  | -1.09739200 | -2.18483800 | C                     | 4.05509500  | -1.07981500 | -2.22249400 |
| C                     | 3.55366700  | -0.34851700 | -1.17247600 | C                     | 3.45914800  | -0.34465600 | -1.19340300 |
| C                     | -3.55366700 | 0.34851700  | -1.17247600 | C                     | -3.45914800 | 0.34465600  | -1.19340300 |
| C                     | -4.16634200 | 1.09739200  | -2.18483800 | C                     | -4.05509500 | 1.07981500  | -2.22249400 |
| C                     | -3.76588400 | 1.00001800  | -3.52276100 | C                     | -3.66691300 | 0.93127700  | -3.56132400 |
| C                     | -2.73320000 | 0.10896700  | -3.83057600 | C                     | -2.66252300 | 0.00023900  | -3.85056500 |
| C                     | -2.10528500 | -0.66718400 | -2.84577500 | C                     | -2.05364300 | -0.76810900 | -2.85069200 |
| C                     | 1.00916800  | 1.62428400  | -3.26628300 | C                     | 0.98042300  | 1.75645600  | -3.25547100 |
| C                     | -4.06335200 | 0.51106600  | 0.24753000  | C                     | -3.95819000 | 0.56568100  | 0.22136200  |
| C                     | -1.00916800 | -1.62428400 | -3.26628300 | C                     | -0.98042300 | -1.75645600 | -3.25547100 |
| C                     | 4.06335200  | -0.51106600 | 0.24753000  | C                     | 3.95819000  | -0.56568100 | 0.22136200  |
| C                     | 4.42968400  | -1.83626700 | -4.59057400 | C                     | 4.31575900  | -1.75337700 | -4.64683600 |
| C                     | -4.42968400 | 1.83626700  | -4.59057400 | C                     | -4.31575900 | 1.75337700  | -4.64683600 |
| H                     | 0.03746000  | -1.24026900 | 6.40952600  | H                     | 0.10984000  | -1.24596800 | 6.41684300  |
| H                     | -0.03746000 | 1.24026900  | 6.40952600  | H                     | -0.10984000 | 1.24596800  | 6.41684300  |
| H                     | 0.58037200  | 4.62725100  | 3.16561100  | H                     | 0.43071400  | 4.65763200  | 3.17626200  |
| H                     | 0.06958500  | 3.34573600  | 5.23681900  | H                     | -0.15891700 | 3.38239900  | 5.22199900  |
| H                     | -0.06958500 | -3.34573600 | 5.23681900  | H                     | 0.15891700  | -3.38239900 | 5.22199900  |
| H                     | -0.58037200 | -4.62725100 | 3.16561100  | H                     | -0.43071400 | -4.65763200 | 3.17626200  |
| H                     | 1.16213400  | -0.20524200 | 0.79304800  | H                     | 1.18537400  | -0.19254300 | 0.84816700  |
| H                     | -1.38041400 | -4.67500800 | 0.91349100  | H                     | -1.29597800 | -4.70484800 | 0.94006700  |
| H                     | -2.24417200 | -3.59132200 | -1.10461800 | H                     | -2.13034000 | -3.62752900 | -1.10384400 |
| H                     | -1.16213400 | 0.20524200  | 0.79304800  | H                     | -1.18537400 | 0.19254300  | 0.84816700  |
| H                     | 2.40680500  | -0.01006500 | -4.87032600 | H                     | 2.34316800  | 0.13167400  | -4.88862700 |
| H                     | 4.98513800  | -1.77450200 | -1.92128600 | H                     | 4.85203000  | -1.78817200 | -1.97532300 |
| H                     | -4.98513800 | 1.77450200  | -1.92128600 | H                     | -4.85203000 | 1.78817200  | -1.97532300 |
| H                     | -2.40680500 | 0.01006500  | -4.87032600 | H                     | -2.34316800 | -0.13167400 | -4.88862700 |
| H                     | 0.10959900  | 1.52774200  | -2.63905000 | H                     | 0.07733600  | 1.66489500  | -2.63336500 |
| H                     | 0.70683200  | 1.44576300  | -4.30893500 | H                     | 0.68222800  | 1.60589600  | -4.30389600 |



|   |             |             |             |   |             |             |             |
|---|-------------|-------------|-------------|---|-------------|-------------|-------------|
| H | 1.33962300  | 2.67416000  | -3.19458100 | H | 1.33216500  | 2.79705800  | -3.15906900 |
| H | -3.40817700 | 1.16190800  | 0.85283700  | H | -3.28101000 | 1.21507800  | 0.80353800  |
| H | -4.13203900 | -0.45225500 | 0.77586900  | H | -4.05355500 | -0.37806100 | 0.77902400  |
| H | -5.06281900 | 0.97164000  | 0.25409700  | H | -4.94238600 | 1.05782500  | 0.21511600  |
| H | -0.70683200 | -1.44576300 | -4.30893500 | H | -0.68222800 | -1.60589600 | -4.30389600 |
| H | -1.33962300 | -2.67416000 | -3.19458100 | H | -1.33216500 | -2.79705800 | -3.15906900 |
| H | -0.10959900 | -1.52774200 | -2.63905000 | H | -0.07733600 | -1.66489500 | -2.63336500 |
| H | 5.06281900  | -0.97164000 | 0.25409700  | H | 4.94238600  | -1.05782500 | 0.21511600  |
| H | 3.40817700  | -1.16190800 | 0.85283700  | H | 3.28101000  | -1.21507800 | 0.80353800  |
| H | 4.13203900  | 0.45225500  | 0.77586900  | H | 4.05355500  | 0.37806100  | 0.77902400  |
| H | 5.52783100  | -1.74687900 | -4.54689700 | H | 5.41345500  | -1.64702900 | -4.62773900 |
| H | 4.10519700  | -1.53749100 | -5.59860100 | H | 3.96328500  | -1.45731800 | -5.64594000 |
| H | 4.18998400  | -2.90668800 | -4.46632700 | H | 4.09737600  | -2.82767100 | -4.51749300 |
| H | -5.52783100 | 1.74687900  | -4.54689700 | H | -5.41345500 | 1.64702900  | -4.62773900 |
| H | -4.10519700 | 1.53749100  | -5.59860100 | H | -3.96328500 | 1.45731800  | -5.64594000 |
| H | -4.18998400 | 2.90668800  | -4.46632700 | H | -4.09737600 | 2.82767100  | -4.51749300 |
| C | 1.34548300  | 3.58393700  | 0.80905000  | C | 1.27295100  | 3.61311400  | 0.84211500  |
| C | 1.82321300  | 2.96671800  | -0.31183700 | C | 1.73475600  | 2.99481600  | -0.30518600 |
| H | 2.24417200  | 3.59132200  | -1.10461800 | H | 2.13034000  | 3.62752900  | -1.10384400 |
| H | 1.38041400  | 4.67500800  | 0.91349100  | H | 1.29597800  | 4.70484800  | 0.94006700  |

**Table S50.** Coordinates of the optimized structure of **CC[5]** (atom / x,y,z coordinates [Å]).

| $S_0$ of <b>CC[5]</b> |             |             |             | $S_1$ of <b>CC[5]</b> |             |             |             |
|-----------------------|-------------|-------------|-------------|-----------------------|-------------|-------------|-------------|
| C                     | -4.27118600 | 0.44612000  | -1.33459700 | C                     | -4.30133700 | -0.38292200 | 1.36376500  |
| C                     | -3.02890200 | 0.34203100  | -0.64181000 | C                     | -3.03177700 | -0.33558700 | 0.64354200  |
| C                     | -3.02883000 | -0.34235600 | 0.64193600  | C                     | -3.03177900 | 0.33558500  | -0.64352400 |
| C                     | -4.27107300 | -0.44658800 | 1.33478800  | C                     | -4.30134100 | 0.38292000  | -1.36374200 |
| C                     | -5.49700700 | -0.16554300 | 0.66313700  | C                     | -5.51588500 | 0.13401500  | -0.68271200 |
| C                     | -5.49705800 | 0.16494800  | -0.66288600 | C                     | -5.51588300 | -0.13401400 | 0.68274000  |
| C                     | -1.88678700 | 1.03939100  | -1.23543700 | C                     | -1.91109500 | -1.03391700 | 1.23269200  |
| C                     | -1.97201900 | 1.49557000  | -2.59072700 | C                     | -1.96981900 | -1.42847900 | 2.62603700  |
| C                     | -3.18699200 | 1.33272700  | -3.32804300 | C                     | -3.16125800 | -1.19336300 | 3.36743900  |
| C                     | -4.30971400 | 0.88540100  | -2.69821400 | C                     | -4.30161500 | -0.72956100 | 2.73878100  |
| C                     | -4.30948300 | -0.88588500 | 2.69839500  | C                     | -4.30162300 | 0.72955500  | -2.73875900 |
| C                     | -3.18667000 | -1.33307600 | 3.32816900  | C                     | -3.16126800 | 1.19335400  | -3.36742200 |
| C                     | -1.97171800 | -1.49575400 | 2.59079700  | C                     | -1.96982500 | 1.42847000  | -2.62602400 |
| C                     | -1.88661400 | -1.03958100 | 1.23550300  | C                     | -1.91109700 | 1.03391200  | -1.23267900 |
| C                     | -0.74460900 | 1.43727500  | -0.48770400 | C                     | -0.77192500 | -1.45462600 | 0.49273800  |
| C                     | 0.28732200  | 2.19246800  | -1.03431800 | C                     | 0.28289700  | -2.17354300 | 1.06879700  |
| C                     | -0.88519800 | -2.20769200 | 3.15853000  | C                     | -0.87604300 | 2.10632300  | -3.20502200 |
| C                     | 0.21772100  | -2.54951100 | 2.40586900  | C                     | 0.23198400  | 2.47414600  | -2.45126000 |
| C                     | 0.28763900  | -2.19236600 | 1.03426500  | C                     | 0.28289500  | 2.17353700  | -1.06879300 |
| C                     | -0.74442400 | -1.43734000 | 0.48770100  | C                     | -0.77192300 | 1.45462100  | -0.49272900 |
| C                     | 1.43859800  | 2.66546700  | -0.19909300 | C                     | 1.43617400  | -2.64393600 | 0.24152800  |
| C                     | 1.43892600  | -2.66527500 | 0.19901200  | C                     | 1.43617600  | 2.64393500  | -0.24153000 |
| C                     | 2.74438800  | 2.17353700  | -0.44215500 | C                     | 2.74366700  | -2.15764300 | 0.49712000  |
| C                     | 3.80774600  | 2.64582400  | 0.33602800  | C                     | 3.80977500  | -2.62590000 | -0.27885600 |
| C                     | 3.62494400  | 3.59772100  | 1.34718900  | C                     | 3.63172000  | -3.56965200 | -1.29872000 |
| C                     | 2.33078100  | 4.07811300  | 1.56401800  | C                     | 2.33730100  | -4.04382000 | -1.52910200 |
| C                     | 1.23376800  | 3.63173600  | 0.81194600  | C                     | 1.23603500  | -3.59971200 | -0.78323000 |
| C                     | 1.23409800  | -3.63133400 | -0.81222700 | C                     | 1.23605500  | 3.59977500  | 0.78317100  |
| C                     | 2.33113000  | -4.07765600 | -1.56430600 | C                     | 2.33732600  | 4.04388700  | 1.52903400  |
| C                     | 3.62531400  | -3.59740900 | -1.34730000 | C                     | 3.63173100  | 3.56966300  | 1.29869800  |
| C                     | 3.80811500  | -2.64570600 | -0.33595400 | C                     | 3.80976800  | 2.62584400  | 0.27889100  |
| C                     | 2.74474300  | -2.17347700 | 0.44224000  | C                     | 2.74365700  | -2.15758200 | -0.49707500 |
| C                     | 3.01491700  | 1.14217100  | -1.51520500 | C                     | 3.01469300  | -1.12945800 | 1.57341600  |
| C                     | -0.13337500 | -4.21635100 | -1.09205800 | C                     | -0.12858800 | 4.18399900  | 1.07788100  |
| C                     | 3.01532900  | -1.14235900 | 1.51552100  | C                     | 3.01465200  | 1.12931600  | -1.57330100 |
| C                     | -0.13368400 | 4.21690700  | 1.09155500  | C                     | -0.12862400 | -4.18386900 | -1.07799900 |
| C                     | 4.79334900  | 4.07766100  | 2.17485600  | C                     | 4.80441200  | -4.04655900 | -2.12139900 |
| C                     | 4.79375200  | -4.07729200 | -2.17494900 | C                     | 4.80443600  | 4.04659900  | 2.12134200  |
| H                     | -6.43404400 | -0.28502500 | 1.21210300  | H                     | -6.45492500 | 0.21934800  | -1.23370300 |
| H                     | -6.43413400 | 0.28433600  | -1.21180500 | H                     | -6.45492100 | -0.21934600 | 1.23373300  |
| H                     | -3.21842700 | 1.65577500  | -4.37138900 | H                     | -3.18612000 | -1.46359900 | 4.42595300  |
| H                     | -5.27021200 | 0.86191100  | -3.21885900 | H                     | -5.23957400 | -0.65085800 | 3.29445500  |
| H                     | -5.26995900 | -0.86253500 | 3.21908700  | H                     | -5.23958400 | 0.65085200  | -3.29443000 |
| H                     | -3.21801700 | -1.65614500 | 4.37151200  | H                     | -3.18613200 | 1.46358600  | -4.42593600 |
| H                     | 4.81190100  | 2.25484800  | 0.14507000  | H                     | 4.81320900  | -2.23674100 | -0.08055200 |
| H                     | 2.16408400  | 4.83192300  | 2.33912000  | H                     | 2.17448600  | -4.79220800 | -2.31020400 |
| H                     | 2.16442300  | -4.83131000 | -2.33955800 | H                     | 2.17452400  | 4.79232400  | 2.31009300  |

|   |             |             |             |   |             |             |             |
|---|-------------|-------------|-------------|---|-------------|-------------|-------------|
| H | 4.81228400  | -2.25482700 | -0.14486700 | H | 4.81319100  | 2.23663600  | 0.08062700  |
| H | 2.30809700  | 0.30042800  | -1.46199900 | H | 2.27575600  | -0.31466300 | 1.55699800  |
| H | 4.03210800  | 0.73581600  | -1.41777700 | H | 4.01208900  | -0.68486800 | 1.44291800  |
| H | 2.92433900  | 1.56844800  | -2.52802400 | H | 2.97973800  | -1.57121400 | 2.58305800  |
| H | -0.78883300 | -3.50141000 | -1.61633500 | H | -0.77285500 | 3.47451200  | 1.62299600  |
| H | -0.65511100 | -4.49677600 | -0.16407700 | H | -0.66632100 | 4.45121400  | 0.15548400  |
| H | -0.04947300 | -5.11231300 | -1.72485300 | H | -0.03630100 | 5.08800000  | 1.69806200  |
| H | 4.03223300  | -0.73539500 | 1.41763800  | H | 4.01209200  | 0.68480700  | -1.44285600 |
| H | 2.92564500  | -1.56911200 | 2.52822600  | H | 2.97956400  | 1.57096900  | -2.58298200 |
| H | 2.30799500  | -0.30100800 | 1.46310000  | H | 2.27577400  | 0.31447100  | -1.55673000 |
| H | -0.04980100 | 5.11277000  | 1.72449100  | H | -0.03635500 | -5.08786500 | -1.69819000 |
| H | -0.78936600 | 3.50198100  | 1.61556700  | H | -0.77283700 | -3.47434400 | -1.62313000 |
| H | -0.65517000 | 4.49753400  | 0.16349100  | H | -0.66640400 | -4.45107200 | -0.15562600 |
| H | 5.62153900  | 4.42845900  | 1.53691200  | H | 5.62552800  | -4.40769400 | -1.48005700 |
| H | 5.19583900  | 3.26649500  | 2.80594200  | H | 5.21608600  | -3.23051500 | -2.74018400 |
| H | 4.50507300  | 4.90519700  | 2.84012800  | H | 4.51796400  | -4.86559000 | -2.79779200 |
| H | 4.50535900  | -4.90435200 | -2.84076100 | H | 4.51792700  | 4.86544500  | 2.79793300  |
| H | 5.62166500  | -4.42874400 | -1.53700200 | H | 5.62541300  | 4.40801100  | 1.47997700  |
| H | 5.19668700  | -3.26590900 | -2.80547100 | H | 5.21632600  | 3.23049900  | 2.73990600  |
| C | -0.88563800 | 2.20765900  | -3.15850700 | C | -0.87603500 | -2.10633400 | 3.20501000  |
| C | 0.21728200  | 2.54962600  | -2.40589500 | C | 0.23199000  | -2.47415600 | 2.45126300  |
| H | -0.96078100 | -2.52896400 | 4.20059300  | H | -0.93309800 | 2.38024700  | -4.26177000 |
| H | 1.02331800  | -3.13857900 | 2.84897200  | H | 1.04559300  | 3.03650000  | -2.91197400 |
| H | -0.68698200 | -1.17428400 | -0.56695700 | H | -0.72697400 | 1.23290000  | 0.57220400  |
| H | 1.02276800  | 3.13881700  | -2.84904000 | H | 1.04560100  | -3.03650900 | 2.91197300  |
| H | -0.96130800 | 2.52893400  | -4.20056200 | H | -0.93308600 | -2.38026200 | 4.26177600  |
| H | -0.68703600 | 1.17420200  | 0.56694300  | H | -0.72698000 | -1.23290300 | -0.57219400 |

**Table S51.** Coordinates of the optimized structure of **BN[6]** (atom / x,y,z coordinates [Å]).

| $S_0$ of <b>BN[6]</b> |             |             |             | $S_1$ of <b>BN[6]</b> |             |             |             |
|-----------------------|-------------|-------------|-------------|-----------------------|-------------|-------------|-------------|
| C                     | 0.82398000  | 4.91399600  | 0.92677800  | C                     | 0.86620700  | 4.95635300  | 0.87636900  |
| C                     | 1.59324400  | 4.24149400  | 1.83535700  | C                     | 1.66623100  | 4.26928800  | 1.77869500  |
| C                     | 1.42097800  | 2.83611100  | 2.03044600  | C                     | 1.50466800  | 2.88145600  | 1.97945300  |
| C                     | 0.51824700  | 2.11524000  | 1.18658900  | C                     | 0.55209100  | 2.14961300  | 1.16256600  |
| C                     | -0.52127600 | 2.11602600  | -1.18669400 | C                     | -0.55753900 | 2.14806700  | -1.16532900 |
| C                     | -1.42529500 | 2.83627600  | -2.02972200 | C                     | -1.51039900 | 2.87590800  | -1.98508100 |
| C                     | -1.60129700 | 4.24083200  | -1.83201800 | C                     | -1.67823600 | 4.26330200  | -1.78403400 |
| C                     | -0.83416800 | 4.91360400  | -0.92184600 | C                     | -0.88392000 | 4.95277300  | -0.87938100 |
| C                     | -0.00429800 | 4.20568700  | 0.00190000  | C                     | -0.00749400 | 4.26212000  | -0.00113400 |
| C                     | -0.00251200 | 2.78223800  | 0.00060600  | C                     | -0.00460600 | 2.80832000  | -0.00156000 |
| C                     | -0.04976800 | 0.83627300  | -1.67088300 | C                     | -0.11176500 | 0.86844500  | -1.66743600 |
| C                     | -0.67537100 | 0.21658300  | -2.78104700 | C                     | -0.80007400 | 0.22281700  | -2.74966400 |
| C                     | 0.05014500  | 0.83345200  | 1.66864000  | C                     | 0.10977100  | 0.87037000  | 1.66632600  |
| C                     | 0.67843800  | 0.21280700  | 2.77672500  | C                     | 0.80098600  | 0.22726700  | 2.74822800  |
| C                     | 0.19313700  | -1.05369200 | 3.26244200  | C                     | 0.36344300  | -1.05066500 | 3.21695800  |
| C                     | -0.91134100 | -1.67272600 | 2.74601600  | C                     | -0.74427100 | -1.69849200 | 2.71590600  |
| B                     | -1.68268200 | -0.98362900 | 1.61734700  | B                     | -1.57571300 | -1.00038400 | 1.64426800  |
| N                     | -1.07232700 | 0.22600200  | 1.14481100  | N                     | -1.01381000 | 0.25374900  | 1.18760600  |
| N                     | 1.07338400  | 0.23015000  | -1.14705600 | N                     | 1.01304200  | 0.25619600  | -1.18753700 |
| B                     | 1.68681700  | -0.97728700 | -1.62108100 | B                     | 1.57913800  | -0.99699000 | -1.64166200 |
| C                     | 0.91886800  | -1.66522600 | -2.75276400 | C                     | 0.75005400  | -1.69878000 | -2.71337400 |
| C                     | -0.18626500 | -1.04747400 | -3.26929500 | C                     | -0.35853800 | -1.05480400 | -3.21643100 |
| C                     | -2.06696700 | 2.18055500  | -3.11894700 | C                     | -2.20596800 | 2.19622100  | -3.02167200 |
| C                     | -1.73199500 | 0.89361000  | -3.45180200 | C                     | -1.88891700 | 0.89971500  | -3.36723300 |
| C                     | 2.06514100  | 2.17973400  | 3.11781500  | C                     | 2.20432400  | 2.20388200  | 3.01501400  |
| C                     | 1.73390600  | 0.89113400  | 3.44802200  | C                     | 1.88989100  | 0.90751000  | 3.36257300  |
| C                     | -3.07316300 | -1.43961700 | 1.01497600  | C                     | -2.97283300 | -1.46100500 | 1.07121200  |
| C                     | 3.07676800  | -1.43215900 | -1.01675500 | C                     | 2.97729200  | -1.45279000 | -1.06822700 |
| C                     | -3.18902300 | -2.60192300 | 0.21606300  | C                     | -3.11619900 | -2.67148600 | 0.34410300  |
| C                     | -4.44070400 | -2.98887100 | -0.28476600 | C                     | -4.37467000 | -3.05898900 | -0.13627800 |
| C                     | -5.60235200 | -2.26078200 | -0.01071900 | C                     | -5.52050100 | -2.29037000 | 0.08953400  |
| C                     | -5.48405500 | -1.11841500 | 0.79088500  | C                     | -5.37756400 | -1.10150900 | 0.81802600  |
| C                     | -4.24956400 | -0.69917100 | 1.30107500  | C                     | -4.13640400 | -0.67612400 | 1.30284400  |
| C                     | 4.24926300  | -0.68728800 | -1.29175600 | C                     | 4.13510900  | -0.66241900 | -1.29264200 |
| C                     | 5.48614200  | -1.10897900 | -0.78054500 | C                     | 5.38100500  | -1.08833500 | -0.81146800 |
| C                     | 5.60512700  | -2.25580500 | 0.00921400  | C                     | 5.52896800  | -2.28059300 | -0.09557600 |
| C                     | 4.44249000  | -2.99220700 | 0.27231700  | C                     | 4.38413400  | -3.05840900 | 0.12308100  |
| C                     | 3.19405700  | -2.60440400 | -0.22696800 | C                     | 3.12650600  | -2.67185800 | -0.35070400 |
| C                     | -4.20331300 | 0.53902100  | 2.17512200  | C                     | -4.07559100 | 0.61270300  | 2.09946600  |
| C                     | 6.93858700  | -2.69440600 | 0.56628800  | C                     | 6.87358600  | -2.72419000 | 0.42725800  |

|   |             |             |             |   |             |             |             |
|---|-------------|-------------|-------------|---|-------------|-------------|-------------|
| C | 4.20584400  | 0.55901200  | -2.15460900 | C | 4.07269000  | 0.63353700  | -2.07766500 |
| C | -1.97234100 | -3.43558400 | -0.12358400 | C | -1.92067500 | -3.54575700 | 0.03867000  |
| C | -6.94730900 | -2.69124900 | -0.54636900 | C | -6.87489000 | -2.72820100 | -0.41272800 |
| C | 1.97740400  | -3.44368400 | 0.09833000  | C | 1.93321800  | -3.55223700 | -0.05429800 |
| H | 0.85780100  | 6.00436400  | 0.86499600  | H | 0.91878000  | 6.04480700  | 0.80646100  |
| H | 2.28148800  | 4.77861100  | 2.49187500  | H | 2.38381300  | 4.80936300  | 2.40096700  |
| H | -2.29057000 | 4.77741600  | -2.48789400 | H | -2.39669000 | 4.80066500  | -2.40766200 |
| H | -0.87076200 | 6.00376800  | -0.85808800 | H | -0.94208700 | 6.04090200  | -0.80833800 |
| H | -1.23179100 | -2.61807500 | 3.19393300  | H | -1.02063200 | -2.66128300 | 3.15462000  |
| H | -1.51764600 | 0.73111500  | 0.38511300  | H | -1.49064500 | 0.76073700  | 0.44641400  |
| H | 1.51663200  | 0.73438200  | -0.38560300 | H | 1.48687600  | 0.76494000  | -0.44550800 |
| H | 1.24216200  | -2.60860600 | -3.20277200 | H | 1.02939200  | -2.66129600 | -3.15077900 |
| H | -0.73723300 | -1.48283600 | -4.11150000 | H | -0.94704000 | -1.49888800 | -4.02778700 |
| H | -2.80439900 | 2.73508300  | -3.70312800 | H | -2.98457100 | 2.73560800  | -3.56668300 |
| H | -2.22276600 | 0.39122800  | -4.28880700 | H | -2.42869400 | 0.39388900  | -4.17070400 |
| H | 2.80155400  | 2.73493100  | 3.70264400  | H | 2.98306300  | 2.74520200  | 3.55791600  |
| H | 2.22673000  | 0.38820800  | 4.28349500  | H | 2.43226800  | 0.40363300  | 4.16558700  |
| H | -4.50851400 | -3.88755600 | -0.90550300 | H | -4.46135500 | -3.99058900 | -0.70351300 |
| H | -6.38148900 | -0.53901100 | 1.03047000  | H | -6.26342100 | -0.49124400 | 1.02044900  |
| H | 6.38274800  | -0.52589200 | -1.01258200 | H | 6.26431900  | -0.47372300 | -1.00980800 |
| H | 4.51108100  | -3.89849800 | 0.88246400  | H | 4.47544400  | -3.99698400 | 0.67866300  |
| H | -5.21655400 | 0.86306100  | 2.45623300  | H | -5.08443100 | 0.94472900  | 2.38694000  |
| H | -3.71722100 | 1.38831700  | 1.66587400  | H | -3.61540000 | 1.43497400  | 1.52564200  |
| H | -3.63603400 | 0.36231000  | 3.10339300  | H | -3.48244700 | 0.49810400  | 3.02052400  |
| H | 7.76369100  | -2.08504000 | 0.16800300  | H | 7.67986700  | -2.05485300 | 0.09219900  |
| H | 7.14882300  | -3.74948700 | 0.32383600  | H | 7.11807900  | -3.74556000 | 0.09043500  |
| H | 6.96069300  | -2.60837800 | 1.66664400  | H | 6.88751500  | -2.73998900 | 1.53088400  |
| H | 3.62861200  | 0.39653900  | -3.07917300 | H | 3.46678400  | 0.53227800  | -2.99174400 |
| H | 5.21948300  | 0.87632500  | -2.44205900 | H | 5.08017100  | 0.96067600  | -2.37547200 |
| H | 3.73326100  | 1.40840100  | -1.63270000 | H | 3.62750200  | 1.45430000  | -1.48970400 |
| H | -1.44088600 | -3.76931500 | 0.78247900  | H | -1.35857400 | -3.80547400 | 0.94930200  |
| H | -1.24537700 | -2.86616300 | -0.72604200 | H | -1.21188100 | -3.03520700 | -0.63501800 |
| H | -2.25048500 | -4.33218400 | -0.69792000 | H | -2.22792300 | -4.48359200 | -0.44831200 |
| H | -6.86132000 | -3.58227100 | -1.18616900 | H | -6.79794000 | -3.60450500 | -1.07350100 |
| H | -7.41734800 | -1.89141100 | -1.14338200 | H | -7.37556900 | -1.92175500 | -0.97405100 |
| H | -7.64694700 | -2.93226600 | 0.27231600  | H | -7.54297700 | -2.99789500 | 0.42377400  |
| H | 2.25297800  | -4.33964200 | 0.67488600  | H | 2.24086600  | -4.48517400 | 0.44169800  |
| H | 1.45717400  | -3.77866200 | -0.81380900 | H | 1.38331300  | -3.82132400 | -0.96975200 |
| H | 1.24162400  | -2.87752700 | 0.69304500  | H | 1.21373000  | -3.04192200 | 0.60788000  |
| H | 0.74639700  | -1.48987200 | 4.10272400  | H | 0.95400700  | -1.49220800 | 4.02824500  |

Table S52. Coordinates of the optimized structure of **CC[6]** (atom / x,y,z coordinates [Å]).

| $S_0$ of <b>CC[6]</b> |             |             |             | $S_1$ of <b>CC[6]</b> |             |             |             |
|-----------------------|-------------|-------------|-------------|-----------------------|-------------|-------------|-------------|
| C                     | -0.66269400 | 4.96933100  | -1.06388500 | C                     | -0.71395700 | 4.98344700  | -1.02174100 |
| C                     | -1.27342000 | 4.28646000  | -2.08029800 | C                     | -1.34184900 | 4.28659200  | -2.04451900 |
| C                     | -1.06937700 | 2.88055500  | -2.22719800 | C                     | -1.12448400 | 2.89210400  | -2.21048200 |
| C                     | -0.30819200 | 2.16884500  | -1.25905700 | C                     | -0.30065500 | 2.18042600  | -1.25171400 |
| C                     | 0.30507700  | 2.17894400  | 1.25106300  | C                     | 0.29902900  | 2.18687600  | 1.24676600  |
| C                     | 1.06586400  | 2.89839700  | 2.21384800  | C                     | 1.12322700  | 2.90283600  | 2.20204000  |
| C                     | 1.27278200  | 4.30254100  | 2.05443300  | C                     | 1.34279300  | 4.29603300  | 2.02837300  |
| C                     | 0.66429700  | 4.97747400  | 1.03144300  | C                     | 0.71628400  | 4.98805200  | 1.00147400  |
| C                     | 0.00040200  | 4.26620400  | -0.01321100 | C                     | 0.00078400  | 4.30034300  | -0.00829700 |
| C                     | -0.00069800 | 2.83777400  | -0.00695400 | C                     | -0.00020300 | 2.83610300  | -0.00430700 |
| C                     | -0.24531800 | 0.88891200  | 1.65824800  | C                     | -0.24936700 | 0.90713900  | 1.66404000  |
| C                     | 0.24369900  | 0.26707100  | 2.85025400  | C                     | 0.29638300  | 0.25098200  | 2.82665200  |
| C                     | 0.23992100  | 0.87461200  | -1.65535400 | C                     | 0.24604500  | 0.89780600  | -1.66229400 |
| C                     | -0.25405600 | 0.24116800  | -2.83912900 | C                     | -0.30173000 | 0.23562900  | -2.82056500 |
| C                     | 0.30155800  | -0.99799300 | -3.24694500 | C                     | 0.23166800  | -1.01693700 | -3.21279700 |
| C                     | 1.37273100  | -1.55759000 | -2.57865800 | C                     | 1.32492500  | -1.57133500 | -2.56665200 |
| C                     | 1.94470200  | -0.89564000 | -1.46174700 | C                     | 1.94046300  | -0.88976100 | -1.48611200 |
| C                     | 1.35444900  | 0.27788400  | -1.00780500 | C                     | 1.37554200  | 0.30789100  | -1.04360900 |
| C                     | -1.35758200 | 0.28585000  | 1.01261800  | C                     | -1.37849700 | 0.31456000  | 1.04721900  |
| C                     | -1.95045100 | -0.88260900 | 1.47606300  | C                     | -1.94462700 | -0.88040800 | 1.49531500  |
| C                     | -1.38465500 | -1.53234400 | 2.60325000  | C                     | -1.33152100 | -1.55604000 | 2.58098700  |
| C                     | -0.31564700 | -0.96658700 | 3.26970600  | C                     | -0.23889000 | -0.99868700 | 3.22559600  |
| C                     | 1.56523300  | 2.22945300  | 3.37993100  | C                     | 1.66052200  | 2.20948300  | 3.31547600  |
| C                     | 1.21671700  | 0.94000100  | 3.65766500  | C                     | 1.30243500  | 0.90311500  | 3.59472900  |
| C                     | -1.57251600 | 2.20111100  | -3.38559200 | C                     | -1.66359600 | 2.19318000  | -3.31954000 |
| C                     | -1.22784400 | 0.90796000  | -3.65079500 | C                     | -1.30765000 | 0.88468000  | -3.59146700 |
| C                     | 3.20433500  | -1.41804300 | -0.83354300 | C                     | 3.20269600  | -1.41466400 | -0.87229700 |

|   |             |             |             |   |             |             |             |
|---|-------------|-------------|-------------|---|-------------|-------------|-------------|
| C | -3.20513800 | -1.41255400 | 0.84442800  | C | -3.20476900 | -1.40869900 | 0.88019300  |
| C | 3.16572300  | -2.48569400 | 0.08791000  | C | 3.18209300  | -2.55529200 | -0.03953600 |
| C | 4.36563400  | -2.95249800 | 0.64484300  | C | 4.38421400  | -3.02327400 | 0.51075200  |
| C | 5.60347500  | -2.39492100 | 0.31249700  | C | 5.60879300  | -2.39893100 | 0.25755600  |
| C | 5.62073800  | -1.34080300 | -0.60977000 | C | 5.60915800  | -1.27290700 | -0.57552600 |
| C | 4.44760600  | -0.84175000 | -1.18758500 | C | 4.43369400  | -0.76780900 | -1.14254200 |
| C | -4.44783200 | -0.82431200 | 1.16719200  | C | -4.43452600 | -0.76173900 | 1.13939000  |
| C | -5.61745100 | -1.33206400 | 0.58229300  | C | -5.60956800 | -1.27228000 | 0.56854600  |
| C | -5.59234300 | -2.40422000 | -0.31408400 | C | -5.60472800 | -2.40106200 | -0.25564700 |
| C | -4.35002800 | -2.97604900 | -0.61662200 | C | -4.37626900 | -3.02881400 | -0.49807900 |
| C | -3.15865300 | -2.50304500 | -0.05449800 | C | -3.17985600 | -2.55775800 | 0.05392300  |
| C | 4.53102700  | 0.29363800  | -2.18341300 | C | 4.50792900  | 0.44272500  | -2.04697100 |
| C | -6.85848100 | -2.93215800 | -0.94603700 | C | -6.87653600 | -2.92877700 | -0.87572600 |
| C | -4.54340200 | 0.33282500  | 2.13671200  | C | -4.51648300 | 0.45490200  | 2.03497900  |
| C | 1.85783700  | -3.12754200 | 0.48697700  | C | 1.88957900  | -3.26632500 | 0.28796500  |
| C | 6.88629600  | -2.90200300 | 0.92765800  | C | 6.89557400  | -2.91448500 | 0.85651100  |
| C | -1.84687800 | -3.15630800 | -0.42088500 | C | -1.88431900 | -3.26937300 | -0.25979300 |
| H | -0.70415300 | 6.06023100  | -1.01720200 | H | -0.78529100 | 6.07254100  | -0.97003200 |
| H | -1.84932600 | 4.81537600  | -2.84341500 | H | -1.94796900 | 4.81542300  | -2.78357800 |
| H | 1.84878500  | 4.83717100  | 2.81348800  | H | 1.94935900  | 4.82808700  | 2.76474500  |
| H | 0.70773900  | 6.06784100  | 0.97513300  | H | 0.78912600  | 6.07674500  | 0.94375100  |
| H | 2.22371200  | 2.78559600  | 4.05177500  | H | 2.35622000  | 2.73912500  | 3.97134300  |
| H | 1.60823500  | 0.43258800  | 4.54267700  | H | 1.72824400  | 0.38512100  | 4.45706400  |
| H | -2.23121800 | 2.75193700  | -4.06158500 | H | -2.35900000 | 2.72007100  | -3.97792800 |
| H | -1.62294200 | 0.39235100  | -4.52945100 | H | -1.73488600 | 0.36231300  | -4.45045000 |
| H | 4.32663300  | -3.77888500 | 1.36070000  | H | 4.35743200  | -3.90269000 | 1.16091600  |
| H | 6.57829900  | -0.89265000 | -0.89228900 | H | 6.55659000  | -0.77204000 | -0.79722300 |
| H | -6.57667500 | -0.87397900 | 0.84083500  | H | -6.55829000 | -0.77127900 | 0.78235600  |
| H | -4.30431800 | -3.81873200 | -1.31337600 | H | -4.34557000 | -3.91374500 | -1.14114300 |
| H | 5.57864100  | 0.53126500  | -2.41989300 | H | 5.55375100  | 0.69130300  | -2.28043000 |
| H | 4.05570500  | 1.21060000  | -1.79822200 | H | 4.04885000  | 1.33128300  | -1.58334500 |
| H | 4.01348000  | 0.04756200  | -3.12451200 | H | 3.97375100  | 0.27479500  | -2.99546300 |
| H | -7.75278900 | -2.45206400 | -0.52151800 | H | -7.76365100 | -2.41134000 | -0.48106700 |
| H | -6.95723500 | -4.02081300 | -0.80067600 | H | -7.00011600 | -4.00770100 | -0.68483700 |
| H | -6.86734000 | -2.75182600 | -2.03491300 | H | -6.87212900 | -2.79524400 | -1.97147100 |
| H | -4.02950300 | 0.11151600  | 3.08583400  | H | -3.97811100 | 0.29942100  | 2.98311600  |
| H | -5.59378700 | 0.56906000  | 2.36216700  | H | -5.56376800 | 0.69628200  | 2.26955400  |
| H | -4.07252200 | 1.24430800  | 1.73330800  | H | -4.06710600 | 1.34396800  | 1.56267200  |
| H | 1.35912200  | -3.60464100 | -0.37258900 | H | 1.43328400  | -3.72313800 | -0.60529000 |
| H | 1.14922800  | -2.38755400 | 0.89026000  | H | 1.14204600  | -2.57339600 | 0.70433700  |
| H | 2.01736500  | -3.90044800 | 1.25335500  | H | 2.05900500  | -4.06764400 | 1.02238600  |
| H | 6.71295900  | -3.79650800 | 1.54436300  | H | 6.72621800  | -3.81576300 | 1.46427300  |
| H | 7.35120600  | -2.13619600 | 1.57231500  | H | 7.36873400  | -2.15629800 | 1.50351400  |
| H | 7.62788400  | -3.16270800 | 0.15423100  | H | 7.62901100  | -3.16919800 | 0.07282800  |
| H | -1.99846900 | -3.95096000 | -1.16636300 | H | -2.04868300 | -4.08010100 | -0.98497200 |
| H | -1.35696600 | -3.60791400 | 0.45718500  | H | -1.43006700 | -3.71342700 | 0.64082700  |
| H | -1.13428400 | -2.42774800 | -0.83793600 | H | -1.13725800 | -2.57923700 | -0.68176400 |
| H | -0.10373300 | -1.48346100 | -4.13860500 | H | -0.20838500 | -1.52366200 | -4.07566100 |
| H | 1.81603400  | -2.49111600 | -2.93275600 | H | 1.74707000  | -2.51594600 | -2.91610900 |
| H | 1.80272200  | 0.78218200  | -0.15355400 | H | 1.85070000  | 0.82745100  | -0.21234900 |
| H | -1.83070600 | -2.46114400 | 2.96618700  | H | -1.75487300 | -2.49826100 | 2.93539900  |
| H | 0.08536500  | -1.44262400 | 4.16835300  | H | 0.19942000  | -1.50069000 | 4.09209200  |
| H | -1.80183500 | 0.78068300  | 0.15088900  | H | -1.85216400 | 0.82959000  | 0.21233100  |

**Table S53.** Coordinates of the optimized structure of **BN[5]-(CN)<sub>2</sub>** (atom / x,y,z coordinates [Å]).

| <b>S<sub>0</sub> of BN[5]-(CN)<sub>2</sub></b> |             |             |             | <b>S<sub>1</sub> of BN[5]-(CN)<sub>2</sub></b> |            |             |             |
|------------------------------------------------|-------------|-------------|-------------|------------------------------------------------|------------|-------------|-------------|
| C                                              | -4.34298200 | 0.65764700  | -1.25703700 | C                                              | 4.38896100 | -0.56496000 | -1.28476300 |
| C                                              | -3.10150500 | 0.44210600  | -0.58268300 | C                                              | 3.12854800 | -0.39849100 | -0.60271800 |
| C                                              | -3.10145600 | -0.44249100 | 0.58258300  | C                                              | 3.10848300 | 0.49754200  | 0.56789800  |
| C                                              | -4.34289900 | -0.65812900 | 1.25696400  | C                                              | 4.36168800 | 0.71525600  | 1.25411400  |
| C                                              | -5.56746000 | -0.26495000 | 0.62848800  | C                                              | 5.57343200 | 0.36035100  | 0.63104500  |
| C                                              | -5.56749700 | 0.26439500  | -0.62851900 | C                                              | 5.58632600 | -0.15861000 | -0.65830700 |
| C                                              | -1.98211900 | 1.23646600  | -1.02745400 | C                                              | 2.04713200 | -1.22275600 | -1.02553600 |
| C                                              | -2.05155900 | 1.94838000  | -2.25533400 | C                                              | 2.11519200 | -1.95801600 | -2.25470400 |
| C                                              | -3.25505400 | 1.92902300  | -3.01253300 | C                                              | 3.31513800 | -1.88165700 | -3.02942900 |
| C                                              | -4.38458100 | 1.34739000  | -2.50097600 | C                                              | 4.42145500 | -1.24400500 | -2.54581200 |
| C                                              | -4.38442900 | -1.34790100 | 2.50089000  | C                                              | 4.36125600 | 1.39651300  | 2.51698500  |
| C                                              | -3.25485100 | -1.92946200 | 3.01241500  | C                                              | 3.23776400 | 2.00364200  | 2.99174100  |
| C                                              | -2.05136200 | -1.94869900 | 2.25520300  | C                                              | 2.03767200 | 2.04573300  | 2.20476200  |
| C                                              | -1.98198700 | -1.23675200 | 1.02733400  | C                                              | 2.00346000 | 1.28478200  | 0.98338900  |

|   |             |             |             |   |             |             |             |
|---|-------------|-------------|-------------|---|-------------|-------------|-------------|
| N | -0.86048100 | 1.43435600  | -0.24310900 | N | 0.91547800  | -1.42474500 | -0.23822400 |
| B | 0.24626700  | 2.30859300  | -0.51905400 | B | -0.16738800 | -2.33240500 | -0.50745300 |
| C | -0.95964500 | -2.77336100 | 2.67418200  | C | 0.96236600  | 2.86263000  | 2.58535000  |
| C | 0.16104300  | -2.98713100 | 1.90325200  | C | -0.18955500 | 3.04616100  | 1.79358200  |
| B | 0.24652600  | -2.30861200 | 0.51897600  | B | -0.23239000 | 2.29734700  | 0.48463500  |
| N | -0.86031300 | -1.43449600 | 0.24301300  | N | 0.86370500  | 1.44157800  | 0.18332700  |
| C | 1.34445100  | 2.54937400  | 0.58337600  | C | -1.27800600 | -2.55189600 | 0.60301200  |
| C | 1.34484000  | -2.54917900 | -0.58337900 | C | -1.39645000 | 2.49664700  | -0.59962500 |
| C | 2.69802000  | 2.18938600  | 0.36736000  | C | -2.64429200 | -2.26156000 | 0.36376200  |
| C | 3.64918300  | 2.42089000  | 1.37064200  | C | -3.59912900 | -2.47353000 | 1.37185000  |
| C | 3.31196000  | 3.02276300  | 2.58698400  | C | -3.25191100 | -2.98963800 | 2.62274800  |
| C | 1.97562500  | 3.38992400  | 2.78705400  | C | -1.90420800 | -3.29703200 | 2.84731000  |
| C | 0.99401700  | 3.16253400  | 1.81553700  | C | -0.92280100 | -3.08833000 | 1.87034400  |
| C | 0.99465700  | -3.16250800 | -1.81553100 | C | -1.14215000 | 3.22507300  | -1.79028200 |
| C | 1.97641000  | -3.38975400 | -2.78693300 | C | -2.17464800 | 3.39891800  | -2.70355900 |
| C | 3.31264800  | -3.02229500 | -2.58675500 | C | -3.50244900 | 2.87471600  | -2.48894400 |
| C | 3.64962600  | -2.42027500 | -1.37041900 | C | -3.75891400 | 2.18221000  | -1.31074200 |
| C | 2.69831200  | -2.18891000 | -0.36724700 | C | -2.75447800 | 1.99287700  | -0.35763100 |
| C | 3.15150500  | 1.56585200  | -0.93523100 | C | -3.12543100 | -1.75191500 | -0.97829200 |
| C | -0.42618000 | -3.60781900 | -2.10832600 | C | 0.21821500  | 3.82114000  | -2.06510200 |
| C | 3.15153100  | -1.56521200 | 0.93535900  | C | -3.06202000 | 1.30536400  | 0.92526200  |
| C | -0.42695800 | 3.60746500  | 2.10824700  | C | 0.50659700  | -3.47734800 | 2.19641100  |
| C | 4.35690400  | 3.29873600  | 3.64091800  | C | -4.28683500 | -3.22496700 | 3.69672700  |
| C | 4.35775100  | -3.29811900 | -3.64057000 | C | -4.54696000 | 3.10535800  | -3.52919600 |
| H | -6.50577900 | -0.47080200 | 1.14807100  | H | 6.51045500  | 0.56864700  | 1.15238100  |
| H | -6.50584700 | 0.47020500  | -1.14806200 | H | 6.53251000  | -0.33179300 | -1.17555400 |
| H | -3.28191700 | 2.46051600  | -3.96618400 | H | 3.35067200  | -2.41420300 | -3.98313100 |
| H | -5.34059500 | 1.42931100  | -3.02178700 | H | 5.36714700  | -1.27819500 | -3.09197700 |
| H | -5.34042700 | -1.42989200 | 3.02172000  | H | 5.30013200  | 1.45362000  | 3.07329700  |
| H | -3.28165700 | -2.46098000 | 3.96605300  | H | 3.24974100  | 2.53608100  | 3.94574200  |
| H | -0.88083600 | 0.97845900  | 0.66322700  | H | 0.95879300  | -0.98163500 | -0.67398700 |
| H | -1.06798500 | -3.28145800 | 3.63791200  | H | 1.05208500  | 3.39965600  | 3.53481300  |
| C | 1.15641400  | -3.89490800 | 2.38982600  | C | -1.23404700 | 3.91069800  | 2.21943800  |
| H | -0.88066000 | -0.97854700 | -0.66329500 | H | 0.90213300  | 0.93207700  | -0.69303100 |
| H | 4.68693500  | 2.12422100  | 1.19230200  | H | -4.64867300 | -2.24108300 | 1.16501200  |
| H | 1.68935800  | 3.87145200  | 3.72716600  | H | -1.60805700 | -3.72034200 | 3.81223900  |
| H | 1.69034500  | -3.87141700 | -3.72703900 | H | -1.98899500 | 3.95579400  | -3.62504500 |
| H | 4.68729800  | -2.12338200 | -1.19199400 | H | -4.75828200 | 1.78971600  | -1.12019300 |
| H | 2.45892400  | 0.78773600  | -1.29179800 | H | -2.42032700 | -1.03826700 | -1.43341400 |
| H | 4.14102900  | 1.09833600  | -0.82681500 | H | -4.10684200 | -1.26049700 | -0.88708400 |
| H | 3.23290000  | 2.32676300  | -1.72868200 | H | -3.23711900 | -2.58225600 | -1.69437700 |
| H | -1.08929700 | -2.76057600 | -2.35597600 | H | 0.97494500  | 3.03927000  | -2.22336000 |
| H | -0.88079400 | -4.12969100 | -1.25111900 | H | 0.55729100  | 4.42508800  | -1.21054800 |
| H | -0.45129600 | -4.29467300 | -2.96722200 | H | 0.19783800  | 4.46164300  | -2.95771000 |
| H | 4.14096000  | -1.09747600 | 0.82701900  | H | -4.06151600 | 0.85453900  | 0.91959800  |
| H | 3.23301800  | -2.32606400 | 1.72885800  | H | -3.00894200 | 2.04191100  | 1.74734900  |
| H | 2.45873500  | -0.78723600 | 1.29181800  | H | -2.31649000 | 0.52769900  | 1.15399200  |
| H | -0.45231300 | 4.29427600  | 2.96716900  | H | 0.53856500  | -4.15467600 | 3.06284600  |
| H | -1.08987300 | 2.76003800  | 2.35581600  | H | 1.13070800  | -2.60295400 | 2.44886100  |
| H | -0.88164500 | 4.12925200  | 1.25102800  | H | 0.99612600  | -3.98599800 | 1.35186900  |
| H | 4.68440000  | 4.35283800  | 3.60627500  | H | -4.32308400 | -4.28787200 | 3.98956700  |
| H | 5.25024500  | 2.67220100  | 3.49867600  | H | -5.29356200 | -2.93582800 | 3.35972300  |
| H | 3.96694600  | 3.11459200  | 4.65461700  | H | -4.05744700 | -2.64912400 | 4.60943700  |
| H | 4.68541500  | -4.35216600 | -3.60587500 | H | -4.67488000 | 4.18707700  | -3.71084400 |
| H | 5.25097400  | -2.67143400 | -3.49824500 | H | -5.51612800 | 2.67424800  | -3.24934600 |
| H | 3.96787100  | -3.11405500 | -4.65431400 | H | -4.22781800 | 2.66934200  | -4.49249700 |
| C | -0.95991300 | 2.77313600  | -2.67432100 | C | 1.05627500  | -2.80693900 | -2.64620100 |
| C | 0.16072600  | 2.98707200  | -1.90336400 | C | -0.07804000 | -3.03525600 | -1.86371600 |
| C | 1.15596200  | 3.89499800  | -2.38992700 | C | -1.05716800 | -3.95766500 | -2.33680200 |
| H | -1.06832100 | 3.28125300  | -3.63803200 | H | 1.17150700  | -3.33544500 | -3.59853700 |
| N | 1.97174600  | -4.63029000 | 2.78212000  | N | -2.13908900 | 4.58896800  | 2.52152600  |
| N | 1.97119800  | 4.63048800  | -2.78221700 | N | -1.87815100 | -4.69539700 | -2.72179900 |

## 7.2. Transition States and Racemization Barrier

The structures of the transition states that occur during racemization were calculated with Q-Chem (jobtype: ts). The presence of a transition state was verified in all cases by a single imaginary frequency in the vibration spectrum. All

transition states showed largely-distorted, non-planar structures with  $C_2$ -symmetry and almost parallel mesityl-substituents. The overall impact of the BN-units was negligible (Fig. S30).

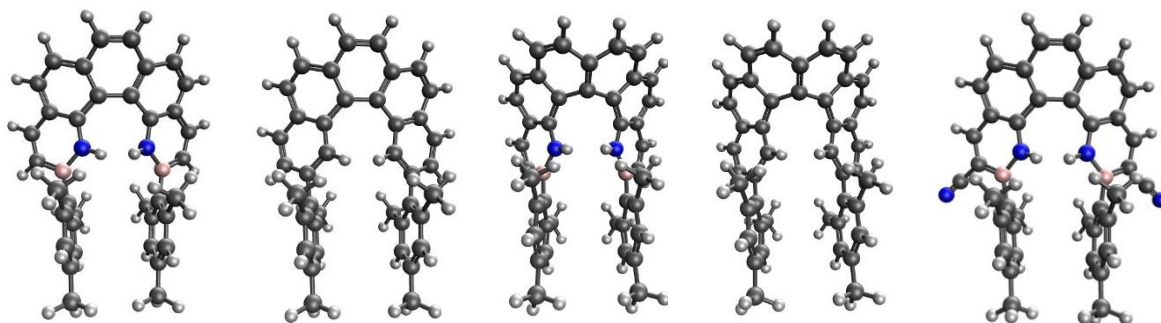

**Fig. S30.** Structures of the transition states of **BN[5]**, **CC[5]**, **BN[6]**, **CC[6]** and **BN[5]-(CN)<sub>2</sub>**.

As the racemization barriers were determined experimentally by ECD in hydrocarbon solvent, we also performed the calculation of the transition states in consideration of the conductor-like polarizable continuum model (CPCM) with *n*-hexane as solvent (dielectric constant: 1.89). Comparing the energies of the optimized structures in  $S_0$  with those of the transition states then allowed a calculation of the Gibbs' free activation energies of enantiomerization ( $\Delta G^\ddagger(T)$ ) in solution. Table S54 shows that the BN-helicenes should racemize significantly more slowly than the carbohelicenes. Although the energy difference was calculated too high, this was in qualitative agreement with the experimental results ( $\Delta G^\ddagger(25\text{ }^\circ\text{C}) = 25.7\text{ kcal mol}^{-1}$  for **BN[5]** and  $24.3\text{ kcal mol}^{-1}$  for **CC[5]**). Moreover, the slightly decreased configurational stability upon the installment of two cyano-moieties ( $\Delta G^\ddagger(25\text{ }^\circ\text{C}) = 25.0\text{ kcal mol}^{-1}$  for **BN[5]-(CN)<sub>2</sub>**) was also mirrored by the calculations.

The elevating effect of BN-substitution on the racemization barriers was also found in the hexahelicenes, which indicates that *N-H* interactions play an important role with respect to the racemization rates.

**Table S54.** Calculated Gibbs' free energies of activation ( $\Delta G^\ddagger(T)$ ) for the racemizations, using CPCM with *n*-hexane as solvent.

| Compound                             | <b>BN[5]</b> | <b>CC[5]</b> | <b>BN[6]</b> | <b>CC[6]</b> | <b>BN[5]-(CN)<sub>2</sub></b> |
|--------------------------------------|--------------|--------------|--------------|--------------|-------------------------------|
| $\Delta G$ [kcal mol <sup>-1</sup> ] | 28.3         | 24.2         | 50.2         | 46.3         | 27.7                          |

### 7.3. Nucleus-Independent Chemical Shifts (NICS)

NICS(0) values (in-plane nucleus-independent chemical shifts) were calculated with Q-Chem (jobtype: nmr) at the MP2<sup>29</sup> / cc-pVDZ level of theory, using the optimized structures from the respective  $S_0$ -calculations as inputs.

### 7.4. Natural Transition Orbitals (NTOs)

Natural transition orbitals (NTOs)<sup>30</sup> were calculated with Q-Chem (jobtype: sp, 40 roots). Fig. S31 shows visualizations (iso value: 0.025) of the NTOs that contribute most to the  $S_1$  states, out of which fluorescence occurs. Also shown are the excitation energies and the respective oscillator strengths  $f$ . All transitions were symmetry-allowed due to a symmetry change upon excitation ( $C_2 \rightarrow C_s$  or vice versa), except for HONTO  $\rightarrow$  LUNTO and HONTO-1  $\rightarrow$  LUNTO+1 of **CC[5]**. Note that for **BN[5]-(CN)<sub>2</sub>**, the  $S_2$  state was calculated at a very similar wavelength (414 nm) to the  $S_1$  state with a much higher oscillator strength of  $f = 0.0996$  and 98.3% contribution of the HONTO (149)  $\rightarrow$  LUNTO (150) transition. Therefore, this state is most likely responsible for the lowest-energy absorption and fluorescence characteristics.

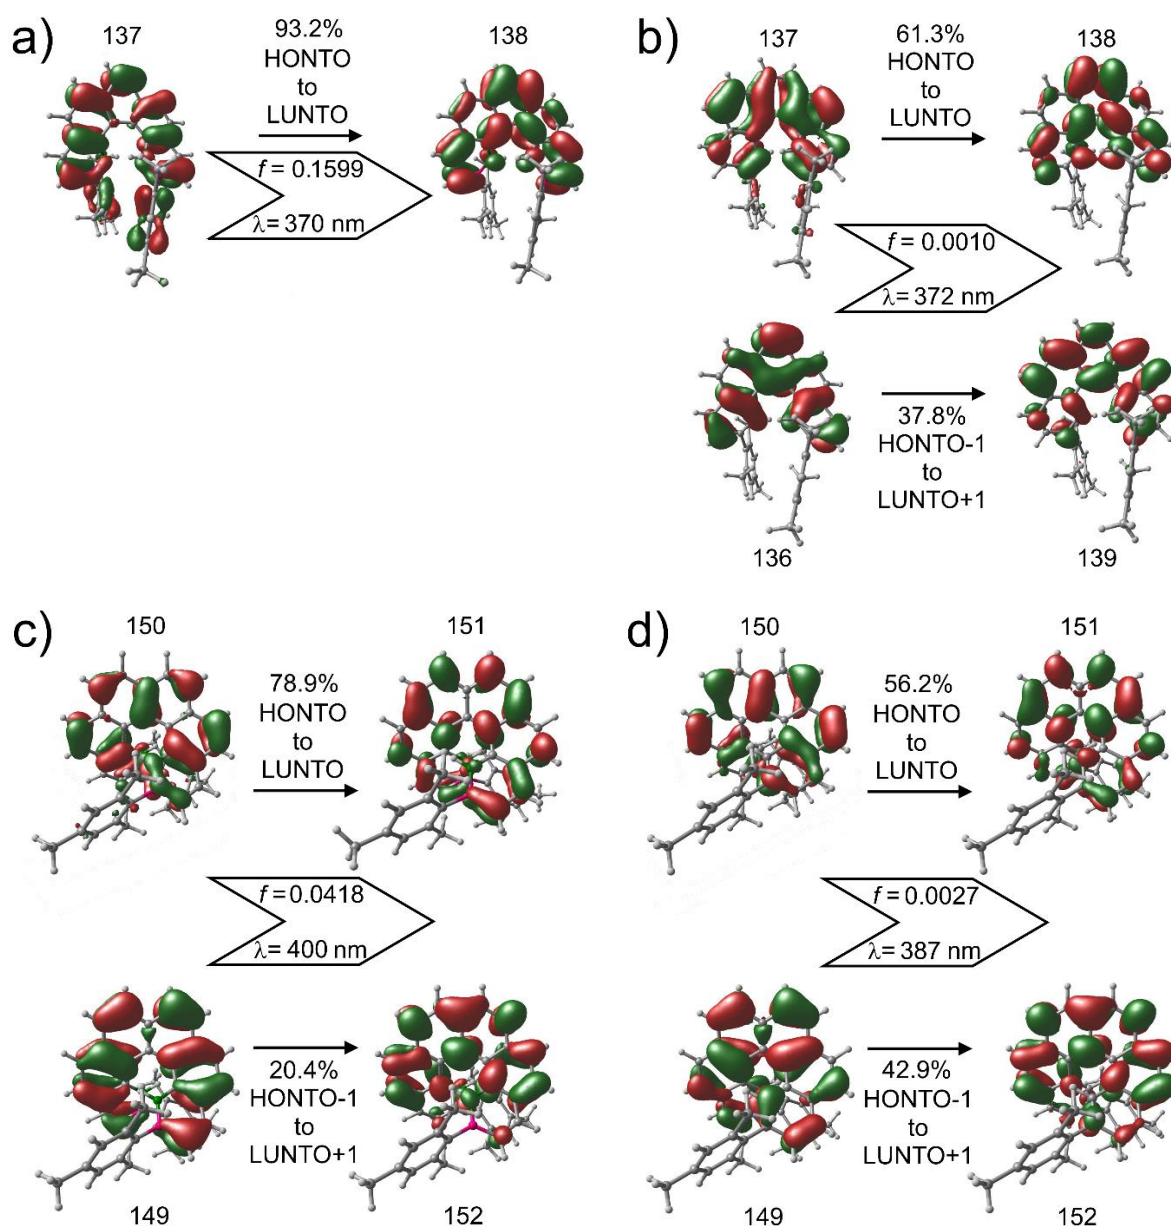

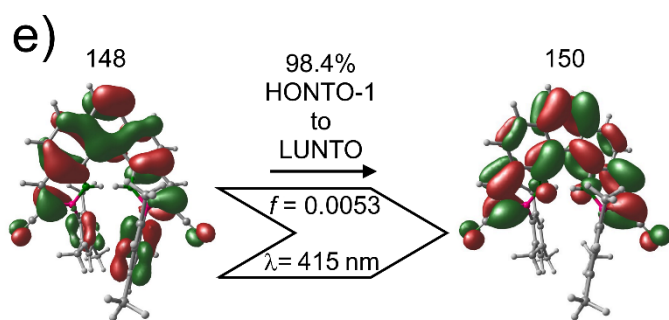

**Fig. S31.** NTO visualizations for **BN[5]** (a), **CC[5]** (b), **BN[6]** (c), **CC[6]** (d) and **BN[5]-(CN)<sub>2</sub>** (e).

## 7.5. Electronic Circular Dichroism (ECD)

ECD spectra of the helicenes in (*M*)-configuration were calculated with Gaussian 09 (jobtype: td). Table S55 lists all wavelengths and rotatory strengths of the 50 lowest-energy states. Fig. S32 compares calculated and measured ECD spectra (second eluted enantiomer from (CSP)-HPLC). In all cases, negative CE was found at the highest wavelengths both in theory and in experiment. Therefore, the absolute configuration of the initially eluted helicenes was always (*P*), while it was (*M*) for the second fractions.

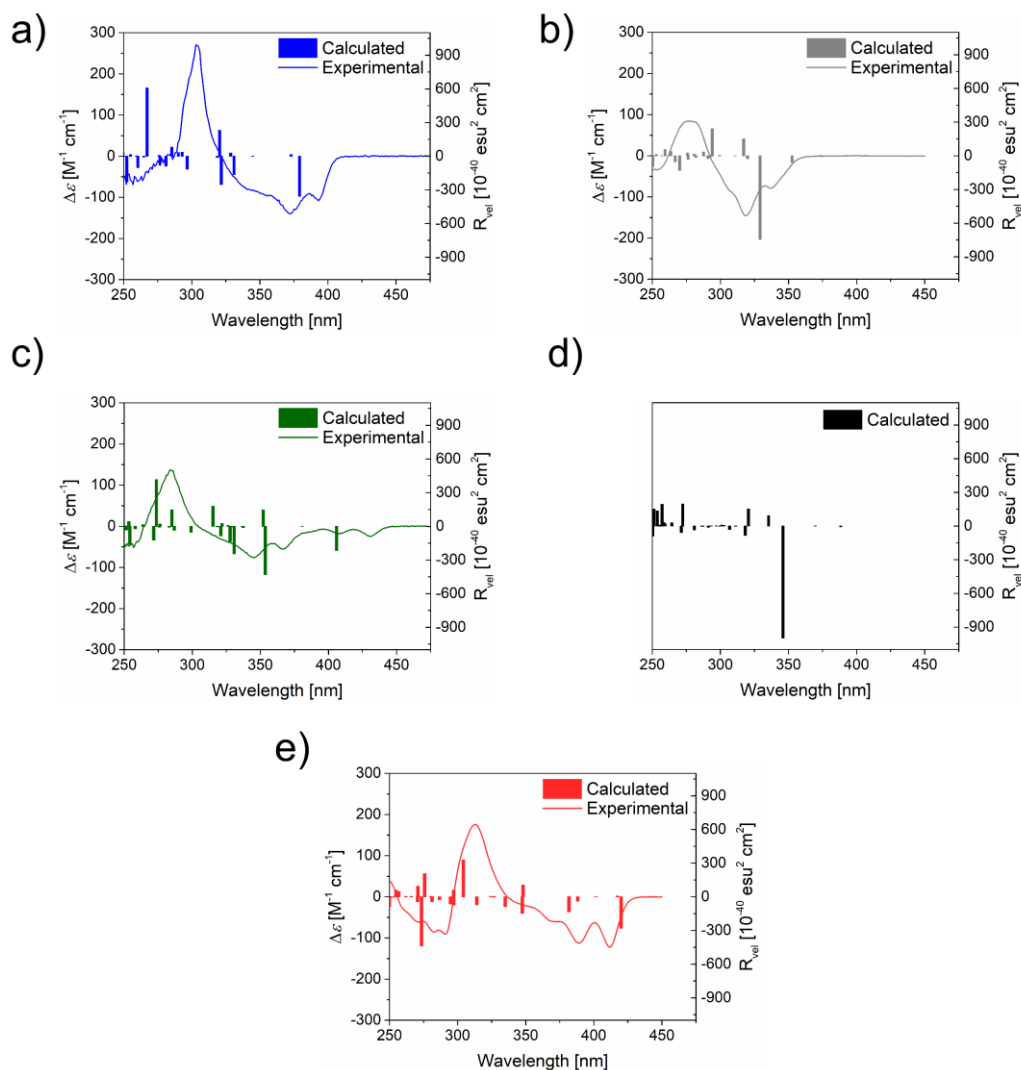

**Fig. S32.** Calculated Cotton bands of **BN[5]** (a), **CC[5]** (b), **BN[6]** (c), **CC[6]** (d) and **BN[5]-(CN)<sub>2</sub>** (e) in (*M*)-configuration and experimentally obtained ECD spectra of the second eluted fractions from (CSP)-HPLC.



**Table S55.** Calculated rotatory strengths for the 50 lowest-energy states.

| State | BN[5]             |                                                                              | BN[6]             |                                                                              | CC[5]             |                                                                              | CC[6]             |                                                                              | BN[5]-(CN) <sub>2</sub> |                                                                              |
|-------|-------------------|------------------------------------------------------------------------------|-------------------|------------------------------------------------------------------------------|-------------------|------------------------------------------------------------------------------|-------------------|------------------------------------------------------------------------------|-------------------------|------------------------------------------------------------------------------|
|       | $\lambda$<br>[nm] | $R_{\text{vel}}$<br>[10 <sup>-40</sup><br>esu <sup>2</sup> cm <sup>2</sup> ] | $\lambda$<br>[nm] | $R_{\text{vel}}$<br>[10 <sup>-40</sup><br>esu <sup>2</sup> cm <sup>2</sup> ] | $\lambda$<br>[nm] | $R_{\text{vel}}$<br>[10 <sup>-40</sup><br>esu <sup>2</sup> cm <sup>2</sup> ] | $\lambda$<br>[nm] | $R_{\text{vel}}$<br>[10 <sup>-40</sup><br>esu <sup>2</sup> cm <sup>2</sup> ] | $\lambda$<br>[nm]       | $R_{\text{vel}}$<br>[10 <sup>-40</sup><br>esu <sup>2</sup> cm <sup>2</sup> ] |
| 1     | 379.24            | -356                                                                         | 405.98            | -216                                                                         | 373.87            | 3                                                                            | 388.35            | -6                                                                           | 420.17                  | -279                                                                         |
| 2     | 372.96            | 14                                                                           | 380.50            | 1                                                                            | 352.57            | -58                                                                          | 369.67            | 2                                                                            | 417.34                  | 6                                                                            |
| 3     | 344.68            | 1                                                                            | 353.56            | -430                                                                         | 329.15            | -746                                                                         | 345.92            | -997                                                                         | 401.69                  | 1                                                                            |
| 4     | 331.01            | -164                                                                         | 352.01            | 145                                                                          | 319.96            | -26                                                                          | 335.36            | 93                                                                           | 388.25                  | -38                                                                          |
| 5     | 328.61            | 27                                                                           | 337.37            | -10                                                                          | 317.08            | 152                                                                          | 320.59            | 151                                                                          | 381.87                  | 2                                                                            |
| 6     | 321.69            | -253                                                                         | 336.83            | 1                                                                            | 310.86            | 1                                                                            | 318.28            | -82                                                                          | 381.75                  | -133                                                                         |
| 7     | 320.45            | 230                                                                          | 330.67            | -244                                                                         | 299.44            | 5                                                                            | 311.19            | 1                                                                            | 348.02                  | 105                                                                          |
| 8     | 318.80            | -10                                                                          | 328.41            | -6                                                                           | 293.99            | 241                                                                          | 311.14            | -1                                                                           | 347.52                  | -149                                                                         |
| 9     | 296.62            | -115                                                                         | 327.77            | -134                                                                         | 293.01            | -6                                                                           | 306.82            | -30                                                                          | 334.92                  | -87                                                                          |
| 10    | 292.92            | 36                                                                           | 326.10            | 7                                                                            | 290.89            | -24                                                                          | 302.73            | 3                                                                            | 326.73                  | 5                                                                            |
| 11    | 290.19            | 32                                                                           | 321.85            | 25                                                                           | 290.17            | 1                                                                            | 301.26            | 7                                                                            | 324.20                  | 2                                                                            |
| 12    | 286.53            | -2                                                                           | 320.85            | -85                                                                          | 287.68            | 33                                                                           | 300.63            | 0                                                                            | 314.13                  | -71                                                                          |
| 13    | 285.33            | 79                                                                           | 319.27            | 1                                                                            | 282.16            | -15                                                                          | 299.54            | -1                                                                           | 304.19                  | 330                                                                          |
| 14    | 281.08            | -87                                                                          | 318.32            | -4                                                                           | 280.77            | 15                                                                           | 297.06            | 2                                                                            | 297.21                  | -75                                                                          |
| 15    | 276.67            | -79                                                                          | 315.08            | 178                                                                          | 276.41            | -31                                                                          | 293.22            | 2                                                                            | 297.06                  | 60                                                                           |
| 16    | 276.05            | 9                                                                            | 299.16            | -52                                                                          | 275.89            | 23                                                                           | 291.19            | -12                                                                          | 294.75                  | -63                                                                          |
| 17    | 267.25            | 607                                                                          | 286.82            | -37                                                                          | 270.06            | -131                                                                         | 287.25            | -2                                                                           | 286.68                  | -27                                                                          |
| 18    | 264.78            | -6                                                                           | 285.06            | 148                                                                          | 266.77            | -54                                                                          | 286.48            | -3                                                                           | 281.20                  | -44                                                                          |
| 19    | 260.47            | -101                                                                         | 283.01            | -7                                                                           | 263.49            | 38                                                                           | 280.91            | -35                                                                          | 280.39                  | 4                                                                            |
| 20    | 259.29            | 2                                                                            | 276.22            | 20                                                                           | 259.38            | 54                                                                           | 272.36            | 195                                                                          | 279.10                  | 0                                                                            |
| 21    | 255.06            | 14                                                                           | 275.78            | -8                                                                           | 256.80            | -1                                                                           | 271.34            | -58                                                                          | 275.72                  | 206                                                                          |
| 22    | 255.02            | 2                                                                            | 273.62            | 417                                                                          | 252.85            | 11                                                                           | 264.52            | 4                                                                            | 273.60                  | -436                                                                         |
| 23    | 252.31            | -228                                                                         | 271.60            | -124                                                                         | 250.28            | -96                                                                          | 264.36            | 28                                                                           | 270.91                  | 95                                                                           |
| 24    | 251.77            | -4                                                                           | 263.75            | 15                                                                           | 247.31            | 118                                                                          | 259.34            | 21                                                                           | 270.53                  | -44                                                                          |
| 25    | 249.53            | 33                                                                           | 258.08            | -23                                                                          | 246.45            | -44                                                                          | 258.26            | 32                                                                           | 266.08                  | 4                                                                            |
| 26    | 247.23            | -4                                                                           | 254.07            | -162                                                                         | 244.49            | 20                                                                           | 257.18            | 194                                                                          | 261.85                  | 3                                                                            |
| 27    | 244.92            | -66                                                                          | 253.46            | 43                                                                           | 241.70            | -24                                                                          | 256.41            | -2                                                                           | 256.80                  | 46                                                                           |
| 28    | 244.23            | -37                                                                          | 251.51            | -33                                                                          | 241.40            | -90                                                                          | 255.93            | 8                                                                            | 254.70                  | 61                                                                           |
| 29    | 243.90            | -2                                                                           | 250.71            | 3                                                                            | 239.94            | -146                                                                         | 253.75            | 134                                                                          | 254.60                  | 15                                                                           |
| 30    | 241.23            | -1                                                                           | 250.60            | -13                                                                          | 239.75            | 47                                                                           | 251.22            | 150                                                                          | 252.49                  | -2                                                                           |
| 31    | 237.83            | -3                                                                           | 248.50            | 12                                                                           | 236.41            | 1                                                                            | 250.32            | -89                                                                          | 251.80                  | -4                                                                           |
| 32    | 236.54            | -8                                                                           | 248.16            | -8                                                                           | 234.22            | 68                                                                           | 249.26            | 4                                                                            | 250.37                  | 3                                                                            |
| 33    | 235.86            | 16                                                                           | 246.63            | 120                                                                          | 234.04            | -20                                                                          | 247.74            | 6                                                                            | 249.89                  | -86                                                                          |
| 34    | 232.11            | -102                                                                         | 243.31            | 1                                                                            | 232.35            | 42                                                                           | 244.94            | 77                                                                           | 246.80                  | -101                                                                         |
| 35    | 230.06            | -5                                                                           | 240.51            | 37                                                                           | 231.79            | -20                                                                          | 244.42            | -64                                                                          | 246.79                  | 8                                                                            |
| 36    | 229.48            | 14                                                                           | 238.76            | 41                                                                           | 230.32            | -6                                                                           | 242.82            | 133                                                                          | 243.86                  | 10                                                                           |
| 37    | 228.48            | 1                                                                            | 237.94            | 42                                                                           | 229.61            | 6                                                                            | 241.07            | -4                                                                           | 239.88                  | 21                                                                           |
| 38    | 227.05            | 43                                                                           | 236.84            | 19                                                                           | 228.81            | 121                                                                          | 240.51            | -27                                                                          | 235.89                  | 14                                                                           |
| 39    | 227.00            | -54                                                                          | 236.72            | 1                                                                            | 227.36            | -10                                                                          | 240.13            | 11                                                                           | 235.72                  | -7                                                                           |
| 40    | 226.48            | 47                                                                           | 236.31            | 35                                                                           | 224.90            | 116                                                                          | 239.67            | -22                                                                          | 233.76                  | 32                                                                           |
| 41    | 225.07            | -1                                                                           | 235.74            | 47                                                                           | 224.84            | 78                                                                           | 237.91            | -4                                                                           | 232.40                  | 1                                                                            |
| 42    | 224.65            | -48                                                                          | 232.58            | -19                                                                          | 224.14            | 76                                                                           | 234.64            | 32                                                                           | 232.38                  | 7                                                                            |
| 43    | 223.58            | 29                                                                           | 231.59            | -49                                                                          | 223.08            | 17                                                                           | 234.35            | -24                                                                          | 231.44                  | -3                                                                           |
| 44    | 223.19            | -3                                                                           | 231.06            | -17                                                                          | 221.27            | 82                                                                           | 233.09            | -18                                                                          | 231.11                  | 39                                                                           |
| 45    | 221.12            | -5                                                                           | 227.39            | -3                                                                           | 220.52            | 35                                                                           | 231.80            | -31                                                                          | 231.02                  | -18                                                                          |
| 46    | 220.71            | 80                                                                           | 226.72            | -22                                                                          | 219.98            | -13                                                                          | 230.71            | -82                                                                          | 229.55                  | 15                                                                           |
| 47    | 220.24            | -6                                                                           | 226.14            | 41                                                                           | 219.34            | -26                                                                          | 230.12            | -7                                                                           | 227.45                  | 204                                                                          |
| 48    | 219.19            | -3                                                                           | 226.03            | -19                                                                          | 219.24            | 82                                                                           | 229.07            | -99                                                                          | 225.86                  | -18                                                                          |
| 49    | 217.93            | 0                                                                            | 225.78            | 13                                                                           | 218.76            | 118                                                                          | 228.02            | 48                                                                           | 224.33                  | 20                                                                           |
| 50    | 216.96            | -26                                                                          | 225.68            | 11                                                                           | 217.21            | -36                                                                          | 226.02            | -3                                                                           | 221.87                  | 2                                                                            |

## 7.6. Absorption and Luminescence Dissymmetry Factors

The dissymmetry factors  $g_{\text{abs}}$  and  $g_{\text{lum}}$  can be calculated using the theoretically obtained transition dipole moments, according to the simplified equation which is valid for most small organic molecules:

$$g_{\text{abs/lum}} \approx 4 \times |m| \times \cos(\theta) / |\mu|.$$

Here,  $|\mu|$  and  $|m|$  are the electric and magnetic transition dipole moments for a particular transition, while  $\theta$  is the angle between both. Table S56 shows the calculated transition dipole moments, angles and dissymmetry factors for the lowest-energy excitation and emission.

**Table S56.** Calculated transition dipole moments, angles and dissymmetry factors for the  $S_0 \rightarrow S_1$  and  $S_1 \rightarrow S_0$  transitions.

|                                  | $S_0 \rightarrow S_1$ transition |                                       |                            |                    | $S_1 \rightarrow S_0$ transition |                                       |                            |                    |                                             |
|----------------------------------|----------------------------------|---------------------------------------|----------------------------|--------------------|----------------------------------|---------------------------------------|----------------------------|--------------------|---------------------------------------------|
|                                  | $ \mu $<br>[ $10^{-20}$ esu cm]  | $ m $<br>[ $10^{-20}$ erg G $^{-1}$ ] | $ \theta $<br>[ $^\circ$ ] | $ g_{\text{abs}} $ | $ \mu $<br>[ $10^{-20}$ esu cm]  | $ m $<br>[ $10^{-20}$ erg G $^{-1}$ ] | $ \theta $<br>[ $^\circ$ ] | $ g_{\text{lum}} $ | $\frac{ g_{\text{lum}} }{ g_{\text{abs}} }$ |
| <b>BN[5]</b>                     | 334                              | 2.61                                  | 114                        | 0.0130             | 405                              | 2.75                                  | 112                        | 0.0103             | 0.79                                        |
| <b>CC[5]</b>                     | 32.6                             | 0.08                                  | 0                          | 0.0095             | 51.0                             | 0.11                                  | 0                          | 0.0085             | 0.89                                        |
| <b>BN[6]</b>                     | 195                              | 1.59                                  | 134                        | 0.0224             | 213                              | 1.73                                  | 135                        | 0.0229             | 1.02                                        |
| <b>CC[6]</b>                     | 51.7                             | 0.37                                  | 106                        | 0.0078             | 36.9                             | 0.25                                  | 102                        | 0.0058             | 0.74                                        |
| <b>BN[5]-(CN)<math>_2</math></b> | 323                              | 2.12                                  | 114                        | 0.0107             | 77.2                             | 0.44                                  | 111                        | 0.0081             | 0.76                                        |

## 7.7. Validation of Dissymmetry Factors

Several recent studies that report the chiroptical properties of helicenes have made use of the long-range corrected hybrid functional CAM-B3LYP.<sup>31-34</sup> This method proved particularly useful for the accurate reproduction of the experimental dissymmetry factors  $g_{\text{abs}}$  and  $g_{\text{lum}}$ .

We were interested whether the unusually high experimental  $g_{\text{lum}}$  value of **BN[6]** was reproducible by using the same theoretical approach. The required calculations were performed by Prof. A. J. Mota from the Department of Inorganic Chemistry from the University of Granada. Using Gaussian 16, Rev. C.02,<sup>35</sup> the  $S_0$  geometry of **BN[6]** was optimized at the B3LYP<sup>26</sup>-D3BJ<sup>36</sup> / 6-311+G(d,p) level of theory, including a Polarizable Continuum Model with DCM. Starting from this input geometry, the vertical transition was calculated with TD-DFT at the CAM-B3LYP<sup>37</sup>-D3BJ / 6-311+G(d,p) level of theory, which allowed to calculate the theoretical  $g_{\text{abs}}$  value. The same level of theory was applied to compute the optimized geometry in  $S_1$  and the  $S_1 \rightarrow S_0$  transition, also enabling the calculation of the theoretical  $g_{\text{lum}}$  value (Table S57).

**Table S57.** Calculated transition dipole moments, angles and dissymmetry factors for the  $S_0 \rightarrow S_1$  and  $S_1 \rightarrow S_0$  transitions of **BN[6]**. Levels of theory: a) B3LYP / cc-pVDZ, gas phase; b) CAM-B3LYP-D3BJ / 6-311+G(d,p), PCM with DCM.

|           | $S_0 \rightarrow S_1$ transition |                                 |                                       |                            |                    | $S_1 \rightarrow S_0$ transition |                                 |                                       |                            |                    |
|-----------|----------------------------------|---------------------------------|---------------------------------------|----------------------------|--------------------|----------------------------------|---------------------------------|---------------------------------------|----------------------------|--------------------|
|           | $\lambda$                        | $ \mu $<br>[ $10^{-20}$ esu cm] | $ m $<br>[ $10^{-20}$ erg G $^{-1}$ ] | $ \theta $<br>[ $^\circ$ ] | $ g_{\text{abs}} $ | $\lambda$                        | $ \mu $<br>[ $10^{-20}$ esu cm] | $ m $<br>[ $10^{-20}$ erg G $^{-1}$ ] | $ \theta $<br>[ $^\circ$ ] | $ g_{\text{lum}} $ |
| <b>a)</b> | 406                              | 195                             | 1.59                                  | 134                        | 0.0224             | 438                              | 213                             | 1.73                                  | 135                        | 0.0229             |
| <b>b)</b> | 354                              | 231                             | 2.11                                  | 126                        | 0.0213             | 392                              | 311                             | 2.38                                  | 121                        | 0.0156             |

While the CAM-B3LYP method expectedly gave an overestimated excitation energy,<sup>38</sup> the  $|g_{\text{abs}}|$  value was similar to the results obtained with B3LYP. With respect to the  $S_1 \rightarrow S_0$  transition, CAM-B3LYP yields a reduced  $|g_{\text{lum}}|$  value for two reasons: Firstly, the electric term  $|\mu|$  undergoes a higher percentage-wise increase for  $S_1 \rightarrow S_0$  than for  $S_0 \rightarrow S_1$ . Secondly, the angle  $\theta$  for the  $S_1 \rightarrow S_0$  transition is smaller than for the excitation. However, the theoretical  $|g_{\text{lum}}|$  value ( $15.6 \times 10^{-3}$ ) agrees very well with the experimental value ( $|g_{\text{lum}}| = 13.3 \times 10^{-3}$ ), as the deviation between experiment and calculation is only 17%. This confirms both the high quality of this theoretical approach and the accuracy of our experimental results.

## 8. References

1. O. V. Dolomanov, L. J. Bourhis, R. J. Gildea, J. A. K. Howard and H. Puschmann, OLEX2: A Complete Structure Solution, Refinement and Analysis Program, *J. Appl. Cryst.*, 2009, **42**, 339-341.
2. G. M. Sheldrick, SHELXT - Integrated Space-Group and Crystal-Structure Determination, *Acta Cryst.*, 2015, **A71**, 3-8.
3. G. M. Sheldrick, Crystal Structure Refinement with SHELXL, *Acta Cryst.*, 2008, **A64**, 112-122.
4. A. W. Baggett, M. Vasiliu, B. Li, D. A. Dixon and S.-Y. Liu, Late-Stage Functionalization of 1,2-Dihydro-1,2-azaborines via Regioselective Iridium-Catalyzed C–H Borylation: The Development of a New N,N-Bidentate Ligand Scaffold, *J. Am. Chem. Soc.*, 2015, **137**, 5536-5541.
5. Apparent singlet. Due to the broadening of the N-H resonance, the  $^3J$  and  $^4J$  couplings to C-H are not visible.
6. Y. Appiaris, T. Stauch, E. Lork, P. Rusch, N. C. Bigall and A. Staubitz, From a 1,2-Azaborinine to Large BN-PAHs via Electrophilic Cyclization: Synthesis, Characterization and Promising Optical Properties, *Org. Chem. Front.*, 2021, **8**, 10-17.
7. B. Wrackmeyer, Carbon-13 NMR spectroscopy of boron compounds, *Prog. Nucl. Magn. Reson. Spectrosc.*, 1979, **12**, 227-259.
8. B. Wrackmeyer, Organoboranes and tetraorganoborates studied by  $^{11}\text{B}$  and  $^{13}\text{C}$  NMR spectroscopy and DFT calculations, *Z. Naturforsch. B*, 2015, **70**, 421-424.
9. The  $^{11}\text{B}$  nucleus ( $I = 3/2$ ) has a quadrupolar moment and is located in an unsymmetrical environment. Therefore, a rapid  $^{11}\text{B}$  spin relaxation occurs. This leads to extremely broadened  $^{13}\text{C}$  resonances with low intensities, impeding their observation.
10. M. Di Giovannantonio, O. Deniz, J. I. Urgel, R. Widmer, T. Dienel, S. Stolz, C. Sánchez-Sánchez, M. Muntwiler, T. Dumsclaff, R. Berger, A. Narita, X. Feng, K. Müllen, P. Ruffieux and R. Fasel, On-Surface Growth Dynamics of Graphene Nanoribbons: The Role of Halogen Functionalization, *ACS Nano*, 2018, **12**, 74-81.
11. S. Luliński and J. Serwatowski, Regiospecific Metalation of Oligobromobenzenes, *J. Org. Chem.*, 2003, **68**, 5384-5387.
12. V. Diemer, F. R. Leroux and F. Colobert, Efficient and Complementary Methods Offering Access to Synthetically Valuable 1,2-Dibromobenzenes, *Eur. J. Org. Chem.*, 2011, **2011**, 327-340.
13. L. D. M. Nicholls, M. Marx, T. Hartung, E. González-Fernández, C. Golz and M. Alcarazo, TADDOL-Derived Cationic Phosphonites: Toward an Effective Enantioselective Synthesis of [6]Helicenes via Au-Catalyzed Alkyne Hydroarylation, *ACS Catal.*, 2018, **8**, 6079-6085.
14. S. Jhulki, A. K. Mishra, T. J. Chow and J. N. Moorthy, Helicenes as All-in-One Organic Materials for Application in OLEDs: Synthesis and Diverse Applications of Carbo- and Aza[5]helical Diamines, *Chem. Eur. J.*, 2016, **22**, 9375-9386.
15. C. Schaack, E. Sidler, N. Trapp and F. Diederich, Helical Threads: Enantiomerically Pure Carbo[6]Helicene Oligomers, *Chem. Eur. J.*, 2017, **23**, 14153-14157.
16. W. Baker, F. Glockling and J. F. W. McOmie, 243. Eight- and higher-membered ring compounds. Part V. Di-(naphthalene-2 : 7-dimethylene) and its conversion into coronene, *J. Chem. Soc.*, 1951, 1118-1121.
17. T. R. Schulte, J. J. Holstein and G. H. Clever, Chiral Self-Discrimination and Guest Recognition in Helicene-Based Coordination Cages, *Angew. Chem. Int. Ed.*, 2019, **58**, 5562-5566.
18. K. Mori, T. Murase and M. Fujita, One-Step Synthesis of [16]Helicene, *Angew. Chem. Int. Ed.*, 2015, **54**, 6847-6851.
19. D. Göbel, S. Míguez-Lago, M. J. Ruedas-Rama, A. Orte, A. G. Campaña and M. Juriček, Circularly Polarized Luminescence of [6]Helicenes through Excited-State Intramolecular Proton Transfer, *Helv. Chim. Acta*, 2022, **105**, e202100221.
20. E. Epifanovsky, A. T. B. Gilbert, X. Feng, J. Lee, Y. Mao, N. Mardirossian, P. Pokhilko, A. F. White, M. P. Coons, A. L. Dempwolff, Z. Gan, D. Hait, P. R. Horn, L. D. Jacobson, I. Kaliman, J. Kussmann, A. W. Lange, K. U. Lao, D. S. Levine, J. Liu, S. C. McKenzie, A. F. Morrison, K. D. Nanda, F. Plasser, D. R. Rehn, M. L. Vidal, Z.-Q. You, Y. Zhu, B. Alam, B. J. Albrecht, A. Aldossary, E. Alguire, J. H. Andersen, V. Athavale, D. Barton, K. Begam, A. Behn, N. Bellonzi, Y. A. Bernard, E. J. Berquist, H. G. A. Burton, A. Carreras, K. Carter-Fenk, R. Chakraborty, A. D. Chien, K. D. Closser, V. Cofer-Shabica, S. Dasgupta, M. de Wergifosse, J. Deng, M. Diedenhofen, H. Do, S. Ehlert, P.-T. Fang, S. Fatehi, Q. Feng, T. Friedhoff, J. Gayvert, Q. Ge, G. Gidofalvi, M. Goldey, J. Gomes, C. E. González-Espinoza, S. Gulania, A. O. Gunina, M. W. D. Hanson-Heine, P. H. P. Harbach, A. Hauser, M. F. Herbst, M. Hernández Vera, M. Hodecker, Z.

- C. Holden, S. Houck, X. Huang, K. Hui, B. C. Huynh, M. Ivanov, Á. Jász, H. Ji, H. Jiang, B. Kaduk, S. Kähler, K. Khistyayev, J. Kim, G. Kis, P. Klunzinger, Z. Koczor-Benda, J. H. Koh, D. Kosenkov, L. Koulias, T. Kowalczyk, C. M. Krauter, K. Kue, A. Kunitsa, T. Kus, I. Ladjánszki, A. Landau, K. V. Lawler, D. Lefrançois, S. Lehtola, R. R. Li, Y.-P. Li, J. Liang, M. Liebenthal, H.-H. Lin, Y.-S. Lin, F. Liu, K.-Y. Liu, M. Loipersberger, A. Luenser, A. Manjanath, P. Manohar, E. Mansoor, S. F. Manzer, S.-P. Mao, A. V. Marenich, T. Markovich, S. Mason, S. A. Maurer, P. F. McLaughlin, M. F. S. J. Menger, J.-M. Mewes, S. A. Mewes, P. Morgante, J. W. Mullinax, K. J. Oosterbaan, G. Paran, A. C. Paul, S. K. Paul, F. Pavošević, Z. Pei, S. Prager, E. I. Proynov, Á. Rák, E. Ramos-Cordoba, B. Rana, A. E. Rask, A. Rettig, R. M. Richard, F. Rob, E. Rossomme, T. Scheele, M. Scheurer, M. Schneider, N. Sergueev, S. M. Sharada, W. Skomorowski, D. W. Small, C. J. Stein, Y.-C. Su, E. J. Sundstrom, Z. Tao, J. Thirman, G. J. Tornai, T. Tsuchimochi, N. M. Tubman, S. P. Veccham, O. Vydrov, J. Wenzel, J. Witte, A. Yamada, K. Yao, S. Yeganeh, S. R. Yost, A. Zech, I. Y. Zhang, X. Zhang, Y. Zhang, D. Zuev, A. Aspuru-Guzik, A. T. Bell, N. A. Besley, K. B. Bravaya, B. R. Brooks, D. Casanova, J.-D. Chai, S. Coriani, C. J. Cramer, G. Cserey, A. E. DePrince, III, R. A. DiStasio, Jr., A. Dreuw, B. D. Dunietz, T. R. Furlani, W. A. Goddard, III, S. Hammes-Schiffer, T. Head-Gordon, W. J. Hehre, C.-P. Hsu, T.-C. Jagau, Y. Jung, A. Klamt, J. Kong, D. S. Lambrecht, W. Liang, N. J. Mayhall, C. W. McCurdy, J. B. Neaton, C. Ochsenfeld, J. A. Parkhill, R. Peverati, V. A. Rassolov, Y. Shao, L. V. Slipchenko, T. Stauch, R. P. Steele, J. E. Subotnik, A. J. W. Thom, A. Tkatchenko, D. G. Truhlar, T. Van Voorhis, T. A. Wesolowski, K. B. Whaley, H. L. Woodcock, III, P. M. Zimmerman, S. Faraji, P. M. W. Gill, M. Head-Gordon, J. M. Herbert and A. I. Krylov, Software for the frontiers of quantum chemistry: An overview of developments in the Q-Chem 5 package, *J. Chem. Phys.*, 2021, **155**.
21. M. J. Frisch, G. W. Trucks, H. B. Schlegel, G. E. Scuseria, M. A. Robb, J. R. Cheeseman, G. Scalmani, V. Barone, B. Mennucci, G. A. Petersson, H. Nakatsuji, M. Caricato, X. Li, H. P. Hratchian, A. F. Izmaylov, J. Bloino, G. Zheng, J. L. Sonnenberg, M. Hada, M. Ehara, K. Toyota, R. Fukuda, J. Hasegawa, M. Ishida, T. Nakajima, Y. Honda, O. Kitao, H. Nakai, T. Vreven, J. A. Montgomery, J. E. Peralta, F. Ogliaro, M. Bearpark, J. J. Heyd, E. Brothers, K. N. Kudin, V. N. Staroverov, R. Kobayashi, J. Normand, K. Raghavachari, A. Rendell, J. C. Burant, S. S. Iyengar, J. Tomasi, M. Cossi, N. Rega, J. M. Millam, M. Klene, J. E. Knox, J. B. Cross, V. Bakken, C. Adamo, J. Jaramillo, R. Gomperts, R. E. Stratmann, O. Yazyev, A. J. Austin, R. Cammi, C. Pomelli, J. W. Ochterski, R. L. Martin, K. Morokuma, V. G. Zakrzewski, G. A. Voth, P. Salvador, J. J. Dannenberg, S. Dapprich, A. D. Daniels, Ö. Farkas, J. B. Foresman, J. V. Ortiz, J. Cioslowski and D. J. Fox, Gaussian 09, Rev. B.01, Wallingford CT, 2010.
  22. A. K. Rappe, C. J. Casewit, K. S. Colwell, W. A. Goddard and W. M. Skiff, UFF, A Full Periodic Table Force Field for Molecular Mechanics and Molecular Dynamics Simulations, *J. Am. Chem. Soc.*, 1992, **114**, 10024-10035.
  23. P. Hohenberg and W. Kohn, Inhomogeneous Electron Gas, *Phys. Rev. B*, 1964, **136**, 864-871.
  24. W. Kohn and L. J. Sham, Self-Consistent Equations Including Exchange and Correlation Effects, *Phys. Rev. A*, 1965, **140**, 1133-1138.
  25. A. D. Becke, Density-Functional Exchange-Energy Approximation with Correct Asymptotic Behavior, *Phys. Rev. A*, 1988, **38**, 3098-3100.
  26. A. D. Becke, A New Mixing of Hartree–Fock and Local Density-Functional Theories, *J. Chem. Phys.*, 1993, **98**, 1372-1377.
  27. C. Lee, W. Yang and R. G. Parr, Development of the Colle-Salvetti Correlation-Energy Formula into a Functional of the Electron Density, *Phys. Rev. B*, 1988, **37**, 785-789.
  28. T. H. Dunning Jr., Gaussian Basis Sets for Use in Correlated Molecular Calculations. I. The Atoms Boron Through Neon and Hydrogen, *J. Chem. Phys.*, 1989, **90**, 1007-1023.
  29. C. Møller and M. S. Plesset, Note on an Approximation Treatment for Many-Electron Systems, *Phys. Rev.*, 1934, **46**, 618-622.
  30. R. L. Martin, Natural transition orbitals, *J. Chem. Phys.*, 2003, **118**, 4775-4777.
  31. C. A. Guido, F. Zinna and G. Pescitelli, CPL calculations of [7]helicenes with alleged exceptional emission dissymmetry values, *J. Mat. Chem. C*, 2023, **11**, 10474-10482.
  32. M. A. Medel, C. M. Cruz, D. Miguel, V. Blanco, S. P. Morcillo and A. G. Campaña, Chiral Distorted Hexaperi-hexabenzocoronenes Bearing a Nonagon-Embedded Carbohelicene, *Angew. Chem. Int. Ed.*, 2021, **60**, 22051-22056.
  33. K. Dhbaibi, L. Abella, S. Meunier-Della-Gatta, T. Roisnel, N. Vanthuyne, B. Jamoussi, G. Pieters, B. Racine, E. Quesnel, J. Autschbach, J. Crassous and L. Favereau, Achieving high circularly polarized luminescence with push–pull helicenic systems: from rationalized design to top-emission CP-OLED applications, *Chem. Sci.*, 2021, **12**, 5522-5533.
  34. S. Abbate, G. Longhi, F. Lebon, E. Castiglioni, S. Superchi, L. Pisani, F. Fontana, F. Torricelli, T. Caronna, C. Villani, R. Sabia, M. Tommasini, A. Lucotti, D. Mendola, A. Mele and D. A. Lightner, Helical Sense-Responsive and Substituent-Sensitive Features in Vibrational and Electronic Circular Dichroism, in

- Circularly Polarized Luminescence, and in Raman Spectra of Some Simple Optically Active Hexahelicenes, *J. Phys. Chem. C*, 2014, **118**, 1682-1695.
35. M. J. Frisch, G. W. Trucks, H. B. Schlegel, G. E. Scuseria, M. A. Robb, J. R. Cheeseman, G. Scalmani, V. Barone, G. A. Petersson, H. Nakatsuji, X. Li, M. Caricato, A. V. Marenich, J. Bloino, B. G. Janesko, R. Gomperts, B. Mennucci, H. P. Hratchian, J. V. Ortiz, A. F. Izmaylov, J. L. Sonnenberg, Williams, F. Ding, F. Lipparini, F. Egidi, J. Goings, B. Peng, A. Petrone, T. Henderson, D. Ranasinghe, V. G. Zakrzewski, J. Gao, N. Rega, G. Zheng, W. Liang, M. Hada, M. Ehara, K. Toyota, R. Fukuda, J. Hasegawa, M. Ishida, T. Nakajima, Y. Honda, O. Kitao, H. Nakai, T. Vreven, K. Throssell, J. A. Montgomery Jr., J. E. Peralta, F. Ogliaro, M. J. Bearpark, J. J. Heyd, E. N. Brothers, K. N. Kudin, V. N. Staroverov, T. A. Keith, R. Kobayashi, J. Normand, K. Raghavachari, A. P. Rendell, J. C. Burant, S. S. Iyengar, J. Tomasi, M. Cossi, J. M. Millam, M. Klene, C. Adamo, R. Cammi, J. W. Ochterski, R. L. Martin, K. Morokuma, O. Farkas, J. B. Foresman and D. J. Fox, Gaussian 16, Rev. C.02, Wallingford CT, 2016.
  36. S. Grimme, S. Ehrlich and L. Goerigk, Effect of the damping function in dispersion corrected density functional theory, *J. Comput. Chem.*, 2011, **32**, 1456-1465.
  37. T. Yanai, D. P. Tew and N. C. Handy, A new hybrid exchange–correlation functional using the Coulomb-attenuating method (CAM-B3LYP), *Chem. Phys. Lett.*, 2004, **393**, 51-57.
  38. D. Jacquemin, V. Wathelet, E. A. Perpète and C. Adamo, Extensive TD-DFT Benchmark: Singlet-Excited States of Organic Molecules, *J. Chem. Theory Comput.*, 2009, **5**, 2420-2435.
